# Supplementary material for: Aryl C–H bond functionalization with diphenyldiazomethane induced by rare-earth metal alkyl complexes
Source: Royal Society of Chemistry journal article supplement (doi:10.1039/d3dt01714a), 2023-01-01
Supplement: d3dt01714a1.pdf [file d3dt01714a1.pdf]

*Electronic Supplementary Information for:*

**Aryl C–H bond functionalization with diphenyldiazomethane induced by rare-earth metal alkyl complexes**

*Dianjun Guo,<sup>a</sup> Thayalan Rajeshkumar,<sup>c</sup> Shan Zhu,<sup>a</sup> Qingbing Yuan,<sup>a</sup> Dongjing Hong,<sup>a</sup> Shuangliu Zhou,<sup>a</sup> Xiancui Zhu,<sup>\*a</sup> Laurent Maron<sup>\*c</sup> and Shaowu Wang<sup>\*a,b</sup>*

<sup>†</sup>Key Laboratory of Functional Molecular Solids, Ministry of Education, Anhui Laboratory of Molecule-Based Materials, College of Chemistry and Materials Science, Anhui Normal University, Wuhu, Anhui 241002 (China).

<sup>‡</sup>Anhui Laboratory of Clean Catalytic Engineering, Anhui Laboratory of Functional Complexes for Materials Chemistry and Application, College of Biological and Chemical Engineering, Anhui Polytechnic University, Wuhu, Anhui 241000 (China).

<sup>§</sup>LPCNO, CNRS & INSA, Université Paul Sabatier, 135 Avenue de Rangueil, 31077 Toulouse, France

|                                                                                               |           |
|-----------------------------------------------------------------------------------------------|-----------|
| <b>1. Crystallographic data.....</b>                                                          | <b>2</b>  |
| <b>Table S1. Crystallographic data of 1a'-2b.....</b>                                         | <b>2</b>  |
| <b>Table S2. Crystallographic data of 2b'-2d .....</b>                                        | <b>3</b>  |
| <b>Table S3. Crystallographic data of 2d'-2g.....</b>                                         | <b>4</b>  |
| <b>Table S4. Crystallographic data of 2h-3a' .....</b>                                        | <b>3</b>  |
| <b>Table S5. Crystallographic data of 4a'-7j.....</b>                                         | <b>6</b>  |
| <b>Table S6. Crystallographic data of 8a-8d.....</b>                                          | <b>7</b>  |
| <b>Table S7. Crystallographic data of 8i and 8j.....</b>                                      | <b>8</b>  |
| <b>2. Molecular structures of complexes 1a'-2h.....</b>                                       | <b>9</b>  |
| <b>3. Characterization data for the rare-earth metal complexes and hydrazone-imines .....</b> | <b>18</b> |
| <b>4. Copies of NMR spectra of the rare-earth metal complexes.....</b>                        | <b>31</b> |
| <b>5. NMR monitoring the transformation of 3a' to 2a' .....</b>                               | <b>53</b> |
| <b>6. NMR monitoring the transformation of 4a' to 2a' .....</b>                               | <b>53</b> |
| <b>7. DFT Study .....</b>                                                                     | <b>59</b> |
| <b>8. References .....</b>                                                                    | <b>94</b> |

## 1. Crystallographic data

**Table S1. Crystallographic data of 1a'-2b**

|                                                                             | 1a' (Lu)                                                           | 2a (Y)                                            | 2a' (Lu)                                           | 2b (Y)                                           |
|-----------------------------------------------------------------------------|--------------------------------------------------------------------|---------------------------------------------------|----------------------------------------------------|--------------------------------------------------|
| CCDC                                                                        | 2192982                                                            | 2192984                                           | 2192983                                            | 2192986                                          |
| Empirical formula                                                           | C <sub>51</sub> H <sub>58</sub> LuN <sub>3</sub> O <sub>2</sub> Si | C <sub>69</sub> H <sub>59</sub> N <sub>6</sub> OY | C <sub>69</sub> H <sub>59</sub> LuN <sub>6</sub> O | C <sub>72</sub> H <sub>59</sub> N <sub>6</sub> Y |
| Formula weight                                                              | 948.06                                                             | 1077.13                                           | 1162.18                                            | 1097.16                                          |
| Crystal system                                                              | monoclinic                                                         | triclinic                                         | triclinic                                          | triclinic                                        |
| Space group                                                                 | <i>C2/c</i>                                                        | <i>P</i> $\bar{1}$                                | <i>P</i> $\bar{1}$                                 | <i>P</i> $\bar{1}$                               |
| <i>a</i> (Å)                                                                | 27.50(6)                                                           | 14.43(7)                                          | 14.08(5)                                           | 11.9372(7)                                       |
| <i>b</i> (Å)                                                                | 12.35(3)                                                           | 16.35(7)                                          | 16.13(6)                                           | 15.1671(8)                                       |
| <i>c</i> (Å)                                                                | 17.13(4)                                                           | 17.84(8)                                          | 17.56(6)                                           | 16.1955(9)                                       |
| $\alpha$ (°)                                                                | 90                                                                 | 98.03(5)                                          | 77.87(4)                                           | 92.2250(10)                                      |
| $\beta$ (°)                                                                 | 120.84(3)                                                          | 94.36(5)                                          | 86.86(9)                                           | 91.3580(10)                                      |
| $\gamma$ (°)                                                                | 90                                                                 | 116.15(5)                                         | 64.85(4)                                           | 94.6340(10)                                      |
| <i>V</i> (Å <sup>3</sup> )                                                  | 4993(20)                                                           | 3698(28)                                          | 3528(22)                                           | 2919.4(3)                                        |
| <i>Z</i>                                                                    | 4                                                                  | 2                                                 | 2                                                  | 2                                                |
| <i>D</i> <sub>calcd</sub> (mg m <sup>-3</sup> )                             | 1.261                                                              | 0.967                                             | 1.094                                              | 1.248                                            |
| $\mu$ (mm <sup>-1</sup> )                                                   | 2.039                                                              | 0.826                                             | 1.439                                              | 1.047                                            |
| <i>F</i> (000)                                                              | 1944.0                                                             | 1124.0                                            | 1186.0                                             | 1144.0                                           |
| $\theta$ range (°)                                                          | 3.45 to 55.142                                                     | 2.828 to 55.26                                    | 2.85 to 55.168                                     | 2.518 to 55.13                                   |
| Reflections collected                                                       | 28265                                                              | 41043                                             | 39132                                              | 34612                                            |
| Data/restraints/parameters                                                  | 5690/1883/490                                                      | 16609/12/695                                      | 15852/1248/729                                     | 13267/393/754                                    |
| Goodness-of-fit on <i>F</i> <sup>2</sup>                                    | 1.163                                                              | 0.883                                             | 0.913                                              | 1.011                                            |
| R(int)                                                                      | 0.0421                                                             | 0.1406                                            | 0.1498                                             | 0.0521                                           |
| <i>R</i> <sub>1</sub> , <i>wR</i> <sub>2</sub> ( <i>I</i> > 2σ( <i>I</i> )) | 0.0685, 0.20299                                                    | 0.0690, 0.1323                                    | 0.0733, 0.1492                                     | 0.0547, 0.1185                                   |

|                                                   |             |             |             |             |
|---------------------------------------------------|-------------|-------------|-------------|-------------|
| $\Delta\rho_{\max,\min}, \text{e}\text{\AA}^{-3}$ | 1.34, -2.25 | 0.39, -0.62 | 2.80, -1.74 | 0.51, -0.35 |
|---------------------------------------------------|-------------|-------------|-------------|-------------|

**Table S2. Crystallographic data of 2b'-2d**

|                                                                             | <b>2b'</b> (Lu)                                  | <b>2c</b> (Y)                                     | <b>2c'</b> (Lu)                                    | <b>2d</b> (Y)                                     |
|-----------------------------------------------------------------------------|--------------------------------------------------|---------------------------------------------------|----------------------------------------------------|---------------------------------------------------|
| CCDC                                                                        | 2192985                                          | 2192988                                           | 2192987                                            | 2192990                                           |
| Empirical formula                                                           | C <sub>65</sub> H <sub>51</sub> LuN <sub>6</sub> | C <sub>66</sub> H <sub>53</sub> N <sub>6</sub> OY | C <sub>66</sub> H <sub>53</sub> LuN <sub>6</sub> O | C <sub>66</sub> H <sub>53</sub> N <sub>6</sub> OY |
| Formula weight                                                              | 1091.08                                          | 1035.05                                           | 1121.11                                            | 1035.05                                           |
| Crystal system                                                              | monoclinic                                       | monoclinic                                        | monoclinic                                         | triclinic                                         |
| Space group                                                                 | <i>P2<sub>1</sub>/n</i>                          | <i>P2<sub>1</sub>/c</i>                           | <i>P2<sub>1</sub>/c</i>                            | <i>P</i> $\bar{1}$                                |
| <i>a</i> (Å)                                                                | 13.6742(10)                                      | 12.84(2)                                          | 12.8580(6)                                         | 11.5090(10)                                       |
| <i>b</i> (Å)                                                                | 25.8835(18)                                      | 19.50(3)                                          | 19.4811(9)                                         | 14.3067(13)                                       |
| <i>c</i> (Å)                                                                | 20.5125(14)                                      | 24.86(4)                                          | 24.8098(11)                                        | 21.0746(19)                                       |
| $\alpha$ (°)                                                                | 90                                               | 90                                                | 90                                                 | 75.5750(10)                                       |
| $\beta$ (°)                                                                 | 106.9660(10)                                     | 98.696(19)                                        | 98.7720(10)                                        | 85.9730(10)                                       |
| $\gamma$ (°)                                                                | 90                                               | 90                                                | 90                                                 | 69.0990(10)                                       |
| <i>V</i> (Å <sup>3</sup> )                                                  | 6944.1(8)                                        | 6156(18)                                          | 6141.9(5)                                          | 3138.9(5)                                         |
| <i>Z</i>                                                                    | 4                                                | 4                                                 | 4                                                  | 2                                                 |
| <i>D</i> <sub>calcd</sub> (mg m <sup>-3</sup> )                             | 1.044                                            | 1.117                                             | 1.212                                              | 1.095                                             |
| $\mu$ (mm <sup>-1</sup> )                                                   | 1.457                                            | 0.990                                             | 1.650                                              | 0.971                                             |
| <i>F</i> (000)                                                              | 2216.0                                           | 2152.0                                            | 2280.0                                             | 1076.0                                            |
| $\theta$ range (°)                                                          | 2.604 to 54.976                                  | 2.666 to 55.038                                   | 2.67 to 54.986                                     | 3.14 to 55.054                                    |
| Reflections collected                                                       | 80822                                            | 71644                                             | 71263                                              | 37086                                             |
| Data/restraints/parameters                                                  | 15837/0/650                                      | 14096/0/669                                       | 14042/6/669                                        | 14255/0/669                                       |
| Goodness-of-fit on <i>F</i> <sup>2</sup>                                    | 0.952                                            | 0.958                                             | 1.007                                              | 0.926                                             |
| R(int)                                                                      | 0.0996                                           | 0.1202                                            | 0.0631                                             | 0.0836                                            |
| <i>R</i> <sub>1</sub> , <i>wR</i> <sub>2</sub> ( <i>I</i> > 2σ( <i>I</i> )) | 0.0489, 0.1148                                   | 0.0564, 0.1127                                    | 0.0360, 0.0762                                     | 0.0572, 0.1081                                    |

$\Delta\rho_{\max,\min}$ , eÅ<sup>-3</sup>      0.88, -0.91      0.27, -0.32      1.24, -0.66      0.27, -0.27

**Table S3. Crystallographic data of 2d'-2g**

|                                                                             | <b>2d' (Lu)</b>                                                                  | <b>2e (Y)</b>                                     | <b>2f (Y)</b>                                    | <b>2g (Y)</b>                                    |
|-----------------------------------------------------------------------------|----------------------------------------------------------------------------------|---------------------------------------------------|--------------------------------------------------|--------------------------------------------------|
| CCDC                                                                        | 2192989                                                                          | 2192991                                           | 2192992                                          | 2192993                                          |
| Empirical formula                                                           | C <sub>132</sub> H <sub>106</sub> Lu <sub>2</sub> N <sub>12</sub> O <sub>2</sub> | C <sub>65</sub> H <sub>50</sub> FN <sub>6</sub> Y | C <sub>65</sub> H <sub>57</sub> N <sub>6</sub> Y | C <sub>66</sub> H <sub>53</sub> N <sub>6</sub> Y |
| Formula weight                                                              | 2242.22                                                                          | 1023.02                                           | 1011.07                                          | 1019.05                                          |
| Crystal system                                                              | monoclinic                                                                       | monoclinic                                        | triclinic                                        | monoclinic                                       |
| Space group                                                                 | <i>P2<sub>1</sub>/n</i>                                                          | <i>P2<sub>1</sub>/n</i>                           | <i>P</i> $\bar{1}$                               | <i>P2<sub>1</sub>/c</i>                          |
| <i>a</i> (Å)                                                                | 14.0687(10)                                                                      | 17.2922(10)                                       | 15.1303(12)                                      | 12.6440(9)                                       |
| <i>b</i> (Å)                                                                | 43.818(3)                                                                        | 20.3976(11)                                       | 15.1348(11)                                      | 19.4671(14)                                      |
| <i>c</i> (Å)                                                                | 20.2354(14)                                                                      | 17.3327(10)                                       | 15.3810(12)                                      | 24.5847(18)                                      |
| $\alpha$ (°)                                                                | 90                                                                               | 90                                                | 91.8130(10)                                      | 90                                               |
| $\beta$ (°)                                                                 | 108.3480(10)                                                                     | 91.7460(10)                                       | 100.9800(10)                                     | 99.3820(10)                                      |
| $\gamma$ (°)                                                                | 90                                                                               | 90                                                | 110.0370(10)                                     | 90                                               |
| <i>V</i> (Å <sup>3</sup> )                                                  | 11840.2(14)                                                                      | 6110.7(6)                                         | 3230.4(4)                                        | 5970.4(7)                                        |
| <i>Z</i>                                                                    | 4                                                                                | 4                                                 | 2                                                | 4                                                |
| <i>D</i> <sub>calcd</sub> (mg m <sup>-3</sup> )                             | 1.258                                                                            | 1.112                                             | 1.039                                            | 1.134                                            |
| $\mu$ (mm <sup>-1</sup> )                                                   | 1.712                                                                            | 0.998                                             | 0.941                                            | 1.019                                            |
| <i>F</i> (000)                                                              | 4560.0                                                                           | 2120.0                                            | 1056.0                                           | 2120.0                                           |
| $\theta$ range (°)                                                          | 2.316 to 54.918                                                                  | 3.084 to 54.938                                   | 2.712 to 55.038                                  | 2.682 to 54.958                                  |
| Reflections collected                                                       | 137606                                                                           | 71142                                             | 38210                                            | 69175                                            |
| Data/restraints/parameters                                                  | 26877/984/1337                                                                   | 13945/0/659                                       | 14656/0/650                                      | 13546/0/660                                      |
| Goodness-of-fit on <i>F</i> <sup>2</sup>                                    | 1.020                                                                            | 0.916                                             | 0.939                                            | 0.967                                            |
| R(int)                                                                      | 0.1278                                                                           | 0.1547                                            | 0.0991                                           | 0.1208                                           |
| <i>R</i> <sub>1</sub> , <i>wR</i> <sub>2</sub> ( <i>I</i> > 2σ( <i>I</i> )) | 0.0722, 0.1415                                                                   | 0.0603, 0.1205                                    | 0.0699, 0.1363                                   | 0.0565, 0.1067                                   |

$\Delta\rho_{\max,\min}, \text{e}\text{\AA}^{-3}$       1.33, -1.45      1.33, -0.33      0.65, -0.40      0.30, -0.27

**Table S4. Crystallographic data of 2h-3a'**

|                                                                             | <b>2h</b> (Y)                                    | <b>2i</b> (Y)                                     | <b>2j</b> (Y)                                    | <b>3a'</b> (Lu)                                     |
|-----------------------------------------------------------------------------|--------------------------------------------------|---------------------------------------------------|--------------------------------------------------|-----------------------------------------------------|
| CCDC                                                                        | 2192994                                          | 2192995                                           | 2192996                                          | 2192997                                             |
| Empirical formula                                                           | C <sub>71</sub> H <sub>55</sub> N <sub>6</sub> Y | C <sub>70</sub> H <sub>57</sub> N <sub>6</sub> SY | C <sub>70</sub> H <sub>57</sub> N <sub>6</sub> Y | C <sub>56</sub> H <sub>52</sub> LuN <sub>5</sub> Si |
| Formula weight                                                              | 1081.12                                          | 1103.18                                           | 1071.12                                          | 998.08                                              |
| Crystal system                                                              | triclinic                                        | triclinic                                         | triclinic                                        | triclinic                                           |
| Space group                                                                 | <i>P</i> $\bar{1}$                               | <i>P</i> $\bar{1}$                                | <i>P</i> $\bar{1}$                               | <i>P</i> $\bar{1}$                                  |
| <i>a</i> (Å)                                                                | 13.339(19)                                       | 11.948(14)                                        | 11.494(9)                                        | 10.8724(6)                                          |
| <i>b</i> (Å)                                                                | 14.75(2)                                         | 14.873(16)                                        | 15.028(11)                                       | 13.1419(7)                                          |
| <i>c</i> (Å)                                                                | 18.38(3)                                         | 16.154(17)                                        | 15.994(13)                                       | 18.0651(10)                                         |
| $\alpha$ (°)                                                                | 81.977(15)                                       | 92.578(16)                                        | 90.881(10)                                       | 97.7980(10)                                         |
| $\beta$ (°)                                                                 | 76.954(14)                                       | 90.58(2)                                          | 95.81(2)                                         | 96.3490(10)                                         |
| $\gamma$ (°)                                                                | 65.660(14)                                       | 93.366(12)                                        | 93.429(13)                                       | 111.5590(10)                                        |
| <i>V</i> (Å <sup>3</sup> )                                                  | 3206(8)                                          | 2863(5)                                           | 2743(4)                                          | 2342.1(2)                                           |
| <i>Z</i>                                                                    | 2                                                | 2                                                 | 2                                                | 2                                                   |
| <i>D</i> <sub>calcd</sub> (mg m <sup>-3</sup> )                             | 1.120                                            | 1.280                                             | 1.297                                            | 1.415                                               |
| $\mu$ (mm <sup>-1</sup> )                                                   | 0.953                                            | 1.103                                             | 1.113                                            | 2.176                                               |
| <i>F</i> (000)                                                              | 1124.0                                           | 1148.0                                            | 1116.0                                           | 1016.0                                              |
| $\theta$ range (°)                                                          | 3.034 to 55.29                                   | 2.524 to 55.044                                   | 2.56 to 55.04                                    | 2.31 to 54.936                                      |
| Reflections collected                                                       | 37959                                            | 33951                                             | 32614                                            | 27571                                               |
| Data/restraints/parameters                                                  | 14610/0/704                                      | 13018/42/705                                      | 12469/42/684                                     | 10573/0/572                                         |
| Goodness-of-fit on <i>F</i> <sup>2</sup>                                    | 0.909                                            | 0.951                                             | 0.970                                            | 1.031                                               |
| R(int)                                                                      | 0.1056                                           | 0.0839                                            | 0.0902                                           | 0.0492                                              |
| <i>R</i> <sub>1</sub> , <i>wR</i> <sub>2</sub> ( <i>I</i> > 2σ( <i>I</i> )) | 0.0621, 0.1098                                   | 0.0588, 0.1012                                    | 0.0661, 0.1147                                   | 0.0455, 0.0840                                      |

$\Delta\rho_{\max,\min}$ , eÅ<sup>-3</sup>      0.25, -0.37      0.37, -0.36      0.43, -0.36      0.43, -0.71

**Table S5. Crystallographic data of 4a'-7j**

|                                                                                      | <b>4a'(Lu)</b>                                       | <b>5c (Y)</b>                                                   | <b>6 (Y)</b>                                       | <b>7j (Y)</b>                                     |
|--------------------------------------------------------------------------------------|------------------------------------------------------|-----------------------------------------------------------------|----------------------------------------------------|---------------------------------------------------|
| CCDC                                                                                 | 2192998                                              | 2192999                                                         | 2193000                                            | 2193001                                           |
| Empirical formula                                                                    | C <sub>59.5</sub> H <sub>53</sub> LuN <sub>4</sub> O | C <sub>57</sub> H <sub>51</sub> N <sub>4</sub> O <sub>2</sub> Y | C <sub>57</sub> H <sub>55</sub> N <sub>4</sub> SiY | C <sub>54</sub> H <sub>47</sub> N <sub>4</sub> OY |
| Formula weight                                                                       | 1015.03                                              | 912.92                                                          | 913.05                                             | 856.86                                            |
| Crystal system                                                                       | triclinic                                            | monoclinic                                                      | monoclinic                                         | triclinic                                         |
| Space group                                                                          | <i>P</i> $\bar{1}$                                   | <i>P</i> 2 <sub>1</sub> / <i>n</i>                              | <i>P</i> 2 <sub>1</sub> / <i>n</i>                 | <i>P</i> $\bar{1}$                                |
| <i>a</i> (Å)                                                                         | 13.8291(7)                                           | 10.3399(9)                                                      | 14.37(2)                                           | 10.74(3)                                          |
| <i>b</i> (Å)                                                                         | 14.0855(7)                                           | 24.627(2)                                                       | 10.679(18)                                         | 13.66(3)                                          |
| <i>c</i> (Å)                                                                         | 14.6541(7)                                           | 20.7916(19)                                                     | 36.16(6)                                           | 17.96(5)                                          |
| $\alpha$ (°)                                                                         | 90.7390(10)                                          | 90                                                              | 90                                                 | 85.25(4)                                          |
| $\beta$ (°)                                                                          | 107.4760(10)                                         | 98.4700(10)                                                     | 100.46(3)                                          | 76.64(3)                                          |
| $\gamma$ (°)                                                                         | 117.4340(10)                                         | 90                                                              | 90                                                 | 74.83(7)                                          |
| <i>V</i> (Å <sup>3</sup> )                                                           | 2377.6(2)                                            | 5236.6(8)                                                       | 5458(16)                                           | 2473(11)                                          |
| <i>Z</i>                                                                             | 2                                                    | 4                                                               | 4                                                  | 2                                                 |
| <i>D</i> <sub>calcd</sub> (mg m <sup>-3</sup> )                                      | 1.418                                                | 1.158                                                           | 1.111                                              | 1.151                                             |
| $\mu$ (mm <sup>-1</sup> )                                                            | 2.122                                                | 1.156                                                           | 1.127                                              | 1.218                                             |
| <i>F</i> (000)                                                                       | 1034.0                                               | 1904.0                                                          | 1912.0                                             | 892.0                                             |
| $\theta$ range (°)                                                                   | 2.962 to 57.16                                       | 2.58 to 55.058                                                  | 2.29 to 55.178                                     | 3.09 to 55.148                                    |
| Reflections collected                                                                | 28725                                                | 61104                                                           | 62836                                              | 28928                                             |
| Data/restraints/parameters                                                           | 11329/87/612                                         | 11966/24/579                                                    | 12492/422/654                                      | 11192/249/588                                     |
| Goodness-of-fit on <i>F</i> <sup>2</sup>                                             | 1.021                                                | 0.968                                                           | 1.023                                              | 0.980                                             |
| R(int)                                                                               | 0.0341                                               | 0.1292                                                          | 0.1223                                             | 0.0665                                            |
| <i>R</i> <sub>1</sub> , <i>wR</i> <sub>2</sub> ( <i>I</i> > 2 $\sigma$ ( <i>I</i> )) | 0.0350, 0.0768                                       | 0.0600, 0.1213                                                  | 0.0691, 0.1497                                     | 0.0630, 0.1430                                    |

$\Delta\rho_{\max,\min}, \text{e}\text{\AA}^{-3}$       1.13, -0.59      0.36, -0.29      0.57, -0.37      0.62, -0.35

**Table S6. Crystallographic data of 8a-8d**

|                                                                                      | <b>8a</b>                                      | <b>8a'</b>                                       | <b>8c</b>                                        | <b>8d</b>                                        |
|--------------------------------------------------------------------------------------|------------------------------------------------|--------------------------------------------------|--------------------------------------------------|--------------------------------------------------|
| CCDC                                                                                 | 2193002                                        | 2193003                                          | 2193004                                          | 2193005                                          |
| Empirical formula                                                                    | C <sub>26</sub> H <sub>21</sub> N <sub>3</sub> | C <sub>26</sub> H <sub>20</sub> N <sub>2</sub> O | C <sub>27</sub> H <sub>23</sub> N <sub>3</sub> O | C <sub>27</sub> H <sub>23</sub> N <sub>3</sub> O |
| Formula weight                                                                       | 375.46                                         | 376.44                                           | 405.48                                           | 405.48                                           |
| Crystal system                                                                       | triclinic                                      | monoclinic                                       | monoclinic                                       | monoclinic                                       |
| Space group                                                                          | <i>P</i> $\bar{1}$                             | <i>P</i> 2 <sub>1</sub> / <i>n</i>               | <i>P</i> 2 <sub>1</sub> / <i>c</i>               | <i>P</i> 2 <sub>1</sub> / <i>c</i>               |
| <i>a</i> (Å)                                                                         | 9.90(3)                                        | 11.2744(10)                                      | 22.752(6)                                        | 14.63(2)                                         |
| <i>b</i> (Å)                                                                         | 10.39(3)                                       | 10.6960(10)                                      | 9.525(2)                                         | 5.784(8)                                         |
| <i>c</i> (Å)                                                                         | 10.65(3)                                       | 17.0182(16)                                      | 10.485(3)                                        | 25.69(4)                                         |
| $\alpha$ (°)                                                                         | 76.10(3)                                       | 90                                               | 90                                               | 90                                               |
| $\beta$ (°)                                                                          | 74.76(3)                                       | 97.3680(10)                                      | 101.731(4)                                       | 104.741(17)                                      |
| $\gamma$ (°)                                                                         | 89.66(3)                                       | 90                                               | 90                                               | 90                                               |
| <i>V</i> (Å <sup>3</sup> )                                                           | 1025(5)                                        | 2035.3(3)                                        | 2224.9(9)                                        | 2102(5)                                          |
| <i>Z</i>                                                                             | 2                                              | 4                                                | 4                                                | 4                                                |
| <i>D</i> <sub>calcd</sub> (mg m <sup>-3</sup> )                                      | 1.217                                          | 1.229                                            | 1.211                                            | 1.281                                            |
| $\mu$ (mm <sup>-1</sup> )                                                            | 0.072                                          | 0.075                                            | 0.075                                            | 0.079                                            |
| <i>F</i> (000)                                                                       | 396.0                                          | 792.0                                            | 856.0                                            | 856.0                                            |
| $\theta$ range (°)                                                                   | 4.046 to 55.08                                 | 4.104 to 55.05                                   | 3.656 to 55.074                                  | 2.928 to 49.996                                  |
| Reflections collected                                                                | 12167                                          | 21793                                            | 11429                                            | 8446                                             |
| Data/restraints/parameters                                                           | 4648/0/263                                     | 4600/7/263                                       | 4893/271/313                                     | 3673/0/235                                       |
| Goodness-of-fit on <i>F</i> <sup>2</sup>                                             | 0.969                                          | 0.999                                            | 1.060                                            | 1.135                                            |
| R(int)                                                                               | 0.0424                                         | 0.0526                                           | 0.0332                                           | 0.1020                                           |
| <i>R</i> <sub>1</sub> , <i>wR</i> <sub>2</sub> ( <i>I</i> > 2 $\sigma$ ( <i>I</i> )) | 0.0541, 0.1223                                 | 0.0488, 0.1219                                   | 0.0582, 0.1527                                   | 0.1432, 0.3662                                   |

$\Delta\rho_{\max,\min}, \text{e}\text{\AA}^{-3}$ 

0.15, -0.20

0.17, -0.24

0.25, -0.16

0.39, -0.42

**Table S7. Crystallographic data of 8i and 8j**

|                                                                             | <b>8i</b>                                        | <b>8j</b>                                      |
|-----------------------------------------------------------------------------|--------------------------------------------------|------------------------------------------------|
| CCDC                                                                        | 2193006                                          | 2193007                                        |
| Empirical formula                                                           | C <sub>24</sub> H <sub>19</sub> N <sub>3</sub> S | C <sub>24</sub> H <sub>19</sub> N <sub>3</sub> |
| Formula weight                                                              | 381.48                                           | 349.42                                         |
| Crystal system                                                              | monoclinic                                       | monoclinic                                     |
| Space group                                                                 | <i>P</i> 2 <sub>1</sub>                          | <i>P</i> 2 <sub>1</sub> / <i>n</i>             |
| <i>a</i> (Å)                                                                | 5.89(2)                                          | 9.0659(7)                                      |
| <i>b</i> (Å)                                                                | 15.53(6)                                         | 11.4910(8)                                     |
| <i>c</i> (Å)                                                                | 10.89(4)                                         | 17.7791(13)                                    |
| $\alpha$ (°)                                                                | 90                                               | 90                                             |
| $\beta$ (°)                                                                 | 95.96(3)                                         | 96.5740(10)                                    |
| $\gamma$ (°)                                                                | 90                                               | 90                                             |
| <i>V</i> (Å <sup>3</sup> )                                                  | 990(6)                                           | 1840.0(2)                                      |
| <i>Z</i>                                                                    | 2                                                | 4                                              |
| <i>D</i> <sub>calcd</sub> (mg m <sup>-3</sup> )                             | 1.279                                            | 1.261                                          |
| $\mu$ (mm <sup>-1</sup> )                                                   | 0.177                                            | 0.075                                          |
| <i>F</i> (000)                                                              | 400.0                                            | 736.0                                          |
| $\theta$ range (°)                                                          | 3.76 to 55.146                                   | 4.228 to 54.948                                |
| Reflections collected                                                       | 9829                                             | 20458                                          |
| Data/restraints/parameters                                                  | 3964/1/241                                       | 4201/0/244                                     |
| Goodness-of-fit on <i>F</i> <sup>2</sup>                                    | 1.028                                            | 0.998                                          |
| R(int)                                                                      | 0.0356                                           | 0.0330                                         |
| <i>R</i> <sub>1</sub> , <i>wR</i> <sub>2</sub> ( <i>I</i> > 2σ( <i>I</i> )) | 0.0644, 0.1285                                   | 0.0495, 0.1378                                 |
| $\Delta\rho_{\max,\min}, \text{e}\text{\AA}^{-3}$                           | 0.16, -0.19                                      | 0.16, -0.25                                    |



## 2. Molecular structures of complexes 1a'-2h.

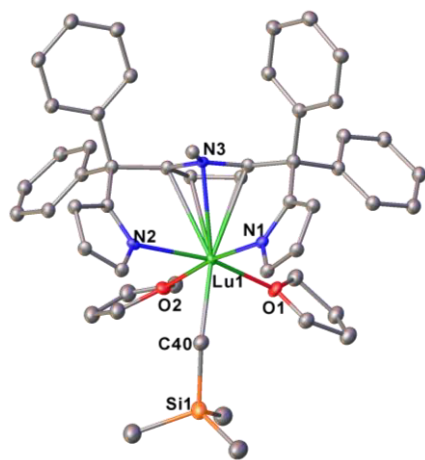

**Figure S1.** Molecular structure of **1a'**. All the hydrogen atoms are omitted. Selected bond lengths (Å) and angles (°): Lu(1)-N(1) 2.228(17), Lu(1)-N(2) 2.435(17), Lu(1)-N(3) 2.776(13), Lu(1)-C(40) 2.43(2), C(40)-Si(1) 1.951(19), C(40)-Lu(1)-N(1) 93.4(7), C(40)-Lu(1)-N(2) 86.2(7), N(1)-Lu(1)-N(2) 101.2(6), N(1)-Lu(1)-O(1) 89.9(5), N(2)-Lu(1)-O(2) 85.0(5), N(1)-Lu(1)-N(3) 71.2(5), N(2)-Lu(1)-N(3) 69.9(5).

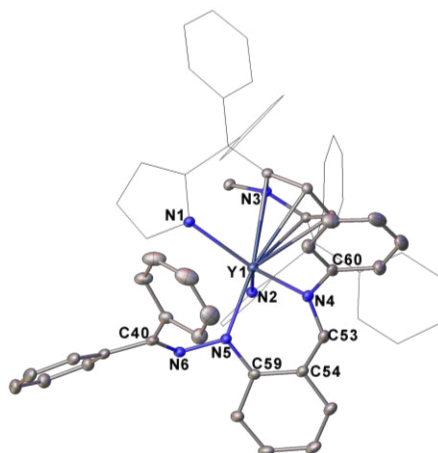

**Figure S2.** Molecular structure of **2b**. All the hydrogen atoms are omitted. The rings of benzene and pyrrole on the ligand were depicted in wireframe style for clarity. Selected bond lengths (Å) and angles (°): Y-N(4) 2.398(2), Y-N(5) 2.316(2), N(5)-N(6) 1.414(3), C(59)-N(5) 1.373(3), C(40)-N(6) 1.283(4), C(53)-N(4) 1.304(4), N(5)-Y-N(4) 74.54(9), N(6)-N(5)-C(59) 110.8(2), C(40)-N(6)-N(5) 117.7(3), N(6)-N(5)-Y 123.03(17), Y-N(5)-C(59) 113.56(18), C(54)-C(53)-N(4) 127.6(3), Y-N(4)-C(53) 114.1(2).

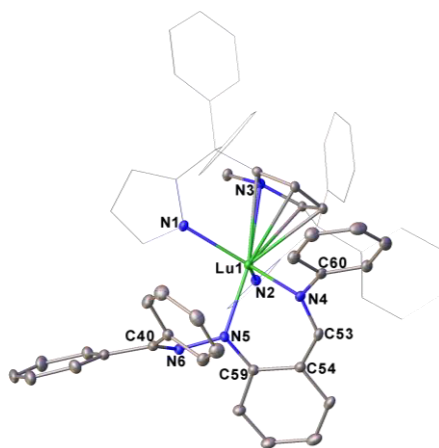

**Figure S3.** Molecular structure of **2b'**. All the hydrogen atoms are omitted. The rings of benzene and pyrrole on the ligand were depicted in wireframe style for clarity. Selected bond lengths (Å) and angles (°): Lu–N(4) 2.332(4), Lu–N(5) 2.267(4), N(5)–N(6) 1.411(5), C(59)–N(5) 1.360(6), C(40)–N(6) 1.274(6), C(53)–N(4) 1.310(6), N(5)–Lu–N(4) 75.81(13), N(6)–N(5)–C(59) 112.2(4), C(40)–N(6)–N(5) 117.0(4), N(6)–N(5)–Lu 122.4(3), Lu–N(5)–C(59) 117.0(3), C(54)–C(53)–N(4) 127.6(4), Lu–N(4)–C(53) 116.0(3).

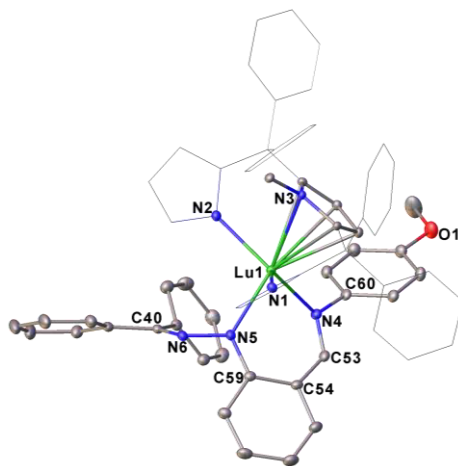

**Figure S4.** Molecular structure of **2c'**. All the hydrogen atoms are omitted. The rings of benzene and pyrrole on the ligand were depicted in wireframe style for clarity. Selected bond lengths (Å) and angles (°): Lu–N(4) 2.340(3), Lu–N(5) 2.263(3), N(5)–N(6) 1.428(4), C(59)–N(5) 1.364(4), C(40)–N(6) 1.285(4), C(53)–N(4) 1.293(4), N(5)–Lu–N(4) 75.42(9), N(6)–N(5)–C(59) 111.6(3), C(40)–N(6)–N(5) 116.0(3), N(6)–N(5)–Lu 120.55(19), Lu–N(5)–C(59) 119.3(2), C(54)–C(53)–N(4) 127.7(3), Lu–N(4)–C(53) 117.3(2).

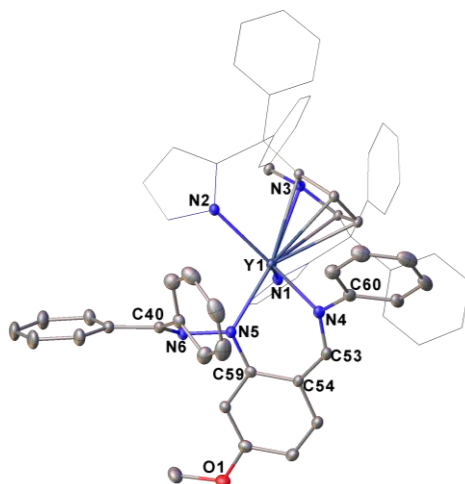

**Figure S5.** Molecular structure of **2d**. All the hydrogen atoms are omitted. The rings of benzene and pyrrole on the ligand were depicted in wireframe style for clarity. Selected bond lengths (Å) and angles (°): Y–N(4) 2.392(3), Y–N(5) 2.315(3), N(5)–N(6) 1.424(3), C(59)–N(5) 1.367(4), C(40)–N(6) 1.279(4), C(53)–N(4) 1.305(4), N(5)–Y–N(4) 74.58(9), N(6)–N(5)–C(59) 110.4(3), C(40)–N(6)–N(5) 117.7(3), N(6)–N(5)–Y 123.03(17), Y–N(5)–C(59) 113.56(18), C(54)–C(53)–N(4) 127.6(3), Y–N(4)–C(53) 114.1(2).

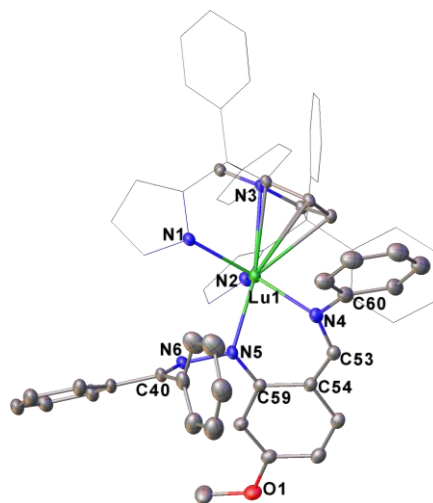

**Figure S6.** Molecular structure of **2d'**. All the hydrogen atoms are omitted. The rings of benzene and pyrrole on the ligand were depicted in wireframe style for clarity. Selected bond lengths (Å) and angles (°): Lu–N(4) 2.344(7), Lu–N(5) 2.255(7), N(5)–N(6) 1.438(9), C(59)–N(5) 1.351(10), C(40)–N(6) 1.254(10), C(53)–N(4) 1.288(10), N(5)–Lu–N(4) 74.4(3), N(6)–N(5)–C(59) 111.6(7), C(40)–N(6)–N(5) 115.8(7), N(6)–N(5)–Lu 117.6(5), Lu–N(5)–C(59) 118.4(5), C(54)–C(53)–N(4) 126.9(9), Lu–N(4)–C(53) 118.6(6).

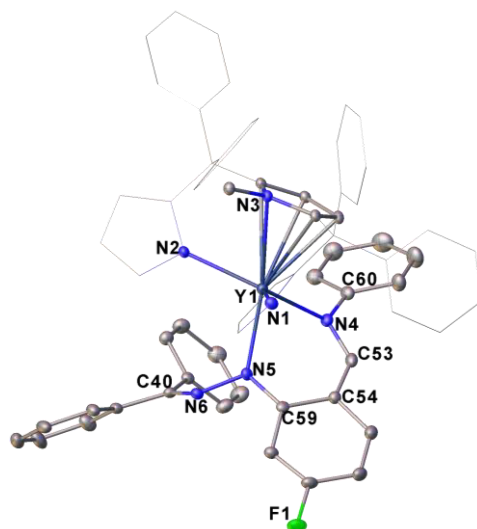

**Figure S7.** Molecular structure of **2e**. All the hydrogen atoms are omitted. The rings of benzene and pyrrole on the ligand were depicted in wireframe style for clarity. Selected bond lengths (Å) and angles (°): Y–N(4) 2.400(3), Y–N(5) 2.310(3), N(5)–N(6) 1.429(4), C(59)–N(5) 1.360(4), C(40)–N(6) 1.280(4), C(53)–N(4) 1.311(5), N(5)–Y–N(4) 73.98(11), N(6)–N(5)–C(59) 73.98(11), C(40)–N(6)–N(5) 113.8(3), N(6)–N(5)–Y 120.6(2), Y–N(5)–C(59) 117.8(2), C(54)–C(53)–N(4) 127.7(4), Y–N(4)–C(53) 116.2(3).

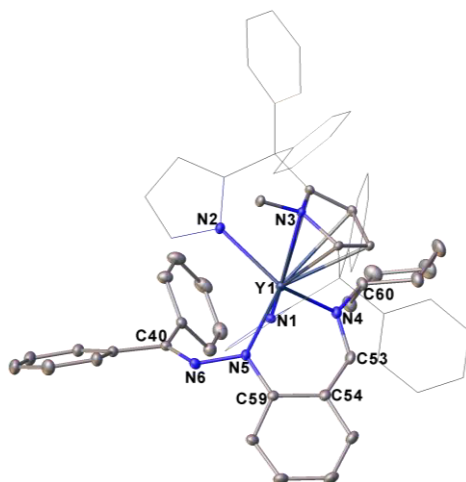

**Figure S8.** Molecular structure of **2f**. All the hydrogen atoms are omitted. The rings of benzene and pyrrole on the ligand were depicted in wireframe style for clarity. Selected bond lengths (Å) and angles (°): Y–N(4) 2.389(3), Y–N(5)–Y–N5 2.300(3), N(5)–N(6) 1.413(4), C(59)–N(5) 1.372(4), C(40)–N(6) 1.286(4), C(53)–N(4) 1.294(5), N(5)–Y–N(4) 74.67(11), N(6)–N(5)–C(59) 111.8(3), C(40)–N(6)–N(5) 117.8(3), N(6)–N(5)–Y 120.0(2), Y–N(5)–C(59) 109.9(2), C(54)–C(53)–N(4) 127.1(4), Y–N(4)–C(53) 112.3(3).

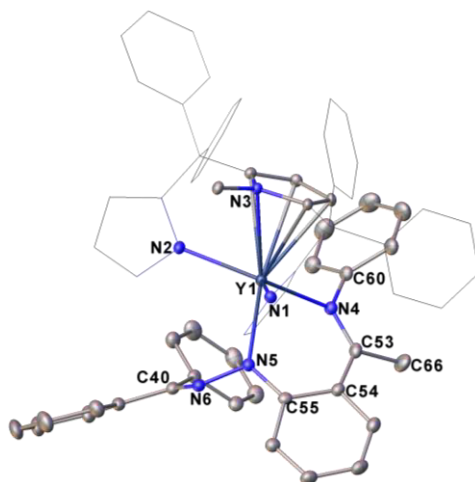

**Figure S9.** Molecular structure of **2g**. All the hydrogen atoms are omitted. The rings of benzene and pyrrole on the ligand were depicted in wireframe style for clarity. Selected bond lengths (Å) and angles (°): Y–N(4) 2.388(2), Y–N(5) 2.290(3), N(5)–N(6) 1.429(3), C(59)–N(5) 1.371(4), C(40)–N(6) 1.292(4), C(53)–N(4) 1.302(4), N(5)–Y–N(4) 73.13(9), N(6)–N(5)–C(59) 73.13(9), C(40)–N(6)–N(5) 114.6(3), N(6)–N(5)–Y 119.02(17), Y–N(5)–C(59) 117.83(19), C(54)–C(53)–N(4) 122.2(3), Y–N(4)–C(53) 124.8(2).

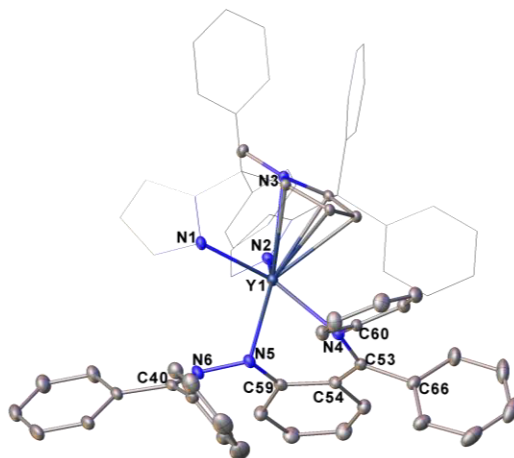

**Figure S10.** Molecular structure of **2h**. All the hydrogen atoms are omitted. The rings of benzene and pyrrole on the ligand were depicted in wireframe style for clarity. Selected bond lengths (Å) and angles (°): Y–N(4) 2.368(4), Y–N(5) 2.287(4), N(5)–N(6) 1.412(4), C(59)–N(5) 1.378(4), C(40)–N(6) 1.278(4), C(53)–N(4) 1.310(4), N(5)–Y–N(4) 72.18(11), N(6)–N(5)–C(59) 111.3(3), C(40)–N(6)–N(5) 115.9(3), N(6)–N(5)–Y 119.2(2), Y–N(5)–C(59) 114.0(2), C(54)–C(53)–N(4) 121.2(3), Y–N(4)–C(53) 120.1(2).

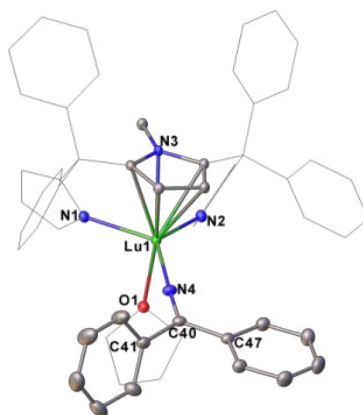

**Figure S11.** Molecular structure of **4a'**. All the hydrogen atoms are omitted. The rings of benzene and pyrrole on the ligand and the carbon atoms of THF were depicted in wireframe style for clarity. Selected bond lengths (Å): Lu1–N1 2.262(3), Lu1–N2 2.272(3), Lu1–N3 2.617(2), Lu1–N4 2.127(3), N4–C40 1.265(4).

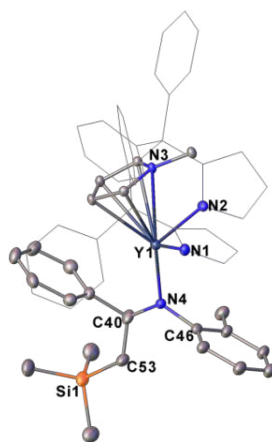

**Figure S12.** Molecular structure of **6**. All the hydrogen atoms are omitted. The rings of benzene and pyrrole on the ligand were depicted in wireframe style for clarity. Selected bond lengths (Å): Y1–N1 2.267(5), Y1–N2 2.267(4), Y1–N3 2.742(5), Y1–N4 2.164(5), N4–C40 1.454(6), N4–C46 1.431(5), C40–C53 1.438(7).

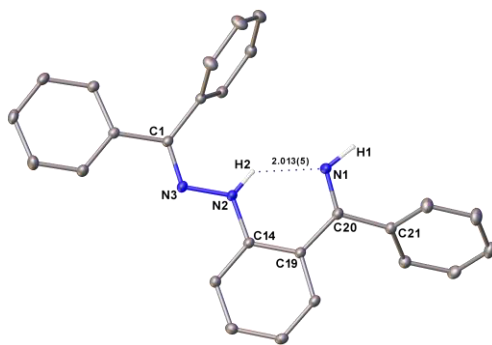

**Figure S13.** Molecular structure of **8a**. All the hydrogen atoms (except for H1 and H2) are omitted. Selected bond lengths (Å) and angles (°): N(3)-N(2) 1.370(4), C(1)-N(3) 1.288(4), C(20)-N(1) 1.262(4), C(14)-N(2) 1.377(4); C(1)-N(3)-N(2) 117.54(17), N(3)-N(2)-C(14) 118.56(16), N(2)-C(14)-C(19) 120.30(17), C(19)-C(20)-N(1) 120.53(19), N(1)-C(20)-C(21) 120.07(19).

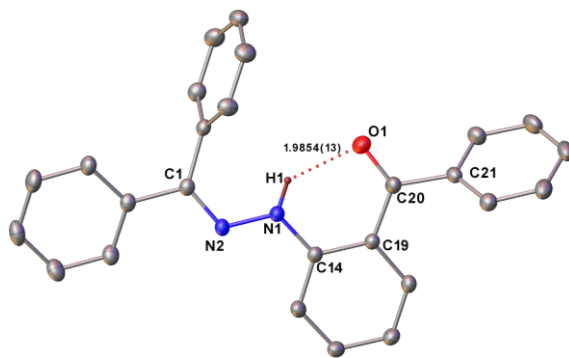

**Figure S14.** Molecular structure of **8a'**. All the hydrogen atoms (except for H1) are omitted. Selected bond lengths (Å) and angles (°): N(2)-N(1) 1.3660(18), C(1)-N(2) 1.292(2), C(20)-O(1) 1.271(4), C(14)-N(1) 1.391(4); C(1)-N(2)-N(1) 117.1(3), N(2)-N(1)-C(14) 119.0(3), N(1)-C(14)-C(19) 120.0(3), C(19)-C(20)-O(1) 120.8(3), O(1)-C(20)-C(21) 118.3(3).

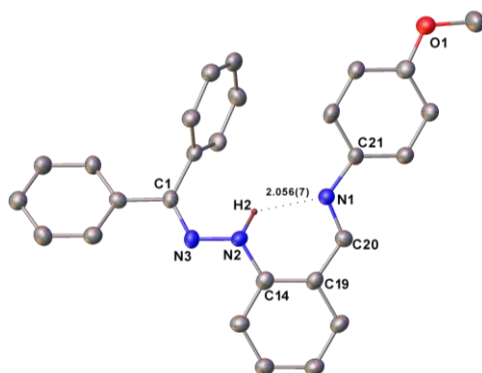

**Figure S15.** Molecular structure of **8c**. All the hydrogen atoms (except for H2) are omitted. Selected bond lengths (Å) and angles (°): N(3)-N(2) 1.332(9), C(1)-N(3) 1.278(10), C(20)-N(1) 1.266(10), C(14)-N(2) 1.364(8), C(21)-N(1) 1.391(8), C(1)-N(3)-N(2) 117.8(7), N(3)-N(2)-C(14) 120.6(7), N(2)-C(14)-C(19) 121.4(5), C(14)-C(19)-C(20) 124.1(4), C(19)-C(20)-N(1) 123.2(8), C(21)-N(1)-C(20) 121.7(7).

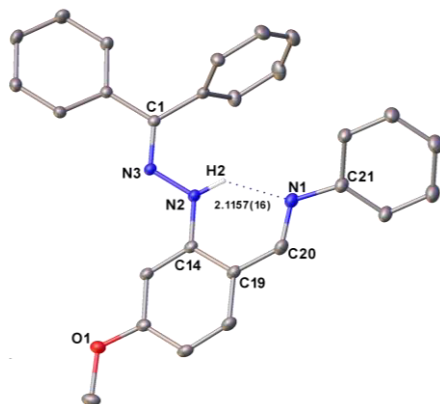

**Figure S16.** Molecular structure of **8d**. All the hydrogen atoms (except for H2) are omitted. Selected bond lengths (Å) and angles (°): N(3)-N(2) 1.371(2), C(1)-N(3) 1.290(2), C(20)-N(1) 1.276(3), C(14)-N(2) 1.377(2), C(21)-N(1) 1.398(3), C(1)-N(3)-N(2) 117.58(15), N(3)-N(2)-C(14) 118.78(15), N(2)-C(14)-C(19) 119.30(17), C(14)-C(19)-C(20) 123.96(18), C(19)-C(20)-N(1) 125.69(19), C(21)-N(1)-C(20) 116.8(2).

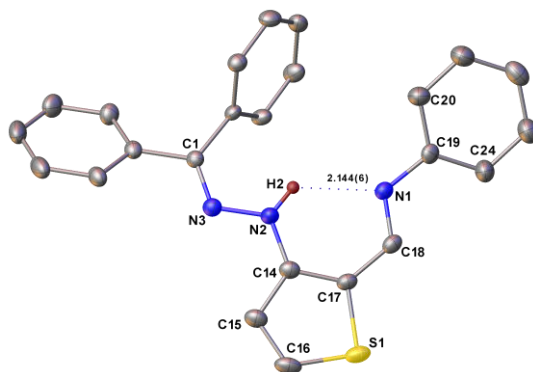

**Figure S17.** Molecular structure of **8i**. All the hydrogen atoms (except for H2) are omitted. Selected bond lengths (Å) and angles (°): N(3)-N(2) 1.363(4), C(1)-N(3) 1.271(4), C(18)-N(1) 1.266(4), C(14)-N(2) 1.353(4), C(19)-N(1) 1.395(3), C(1)-N(3)-N(2) 117.32(10), N(3)-N(2)-C(14) 118.75(12), N(2)-C(14)-C(17) 121.29(13), C(14)-C(17)-C(18) 128.35(12), C(17)-C(18)-N(1) 121.63(18), C(18)-N(1)-C(19) 120.36(18).



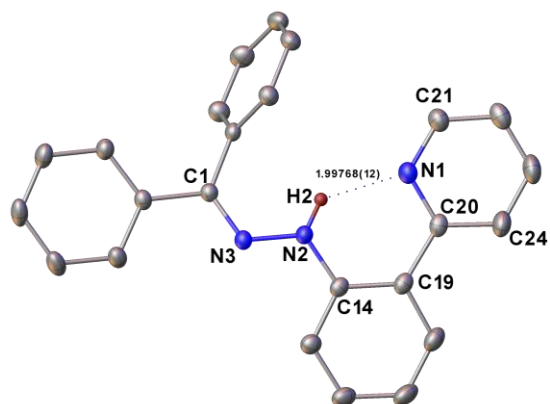

**Figure S18.** Molecular structure of **8j**. All the hydrogen atoms (except for H2) are omitted. Selected bond lengths (Å) and angles (°): N(3)-N(2) 1.35733(7), C(1)-N(3) 1.29097(7), C(20)-N(1) 1.33259(7), C(14)-N(2) 1.38069(7), C(21)-N(1) 1.33699(7), C(1)-N(3)-N(2) 118.8005(18), N(3)-N(2)-C(14) 119.115(2), N(2)-C(14)-C(19) 120.877(2), C(14)-C(19)-C(20) 124.226(3), C(19)-C(20)-N(1) 118.314(4), C(21)-N(1)-C(20) 119.211(4).

### 3. Characterization data for the rare-earth metal complexes and hydrazone-imines

#### General procedures.

All manipulations of oxygen- or moisture-sensitive materials were carried out under an atmosphere of argon in BRAUN glovebox or using standard Schlenk techniques. All glassware was rigorously dried one hour at 110 °C and cooled under vacuum before use. Toluene, *n*-hexane, and THF were dried and distilled at atmospheric pressure from sodium benzophenone ketyl; sodium was used to dry these solvents. Diphenyldiazomethane<sup>1</sup>,  $\text{LY}(\text{CH}_2\text{SiMe}_3)(\text{THF})_2$ ,<sup>2</sup> and substituted imines<sup>3</sup> were prepared according to literature methods. All other reagents were purchased from commercial sources and used as received. Elemental analyses data were obtained on a PerkinElmer 2400 Series II elemental analyzer. The NMR spectra were collected on a Bruker AV-500 NMR spectrometer (500 MHz for <sup>1</sup>H; 126 MHz for <sup>13</sup>C; 471 MHz for <sup>19</sup>F). Chemical shifts ( $\delta$ ) and *J* values were reported in ppm and Hz respectively. Under argon protection, suitable crystals of rare-earth metal complexes were sealed in a thin-walled capillary. X-ray crystallographic diffraction was performed on a Bruker SMART CCD area detector diffractometer using graphite-monochromated Mo-K $\alpha$  radiation ( $\lambda = 0.71073$  Å). An empirical absorption correction was applied using the SADABS program.<sup>4</sup> All structures were solved by direct methods, completed by subsequent difference Fourier syntheses, and refined

anisotropically for all non-hydrogen atoms by full-matrix least-squares calculations on  $F^2$  using the SHELXTL program package. The solvents of some structures were moved by Platon Squeeze.<sup>5</sup>

**Preparation of 1a'.** To a clear colorless solution of the ligand H<sub>2</sub>L (1.00 g, 1.84 mmol) in 7.0 mL of THF was added a clear colorless solution of Lu(CH<sub>2</sub>SiMe<sub>3</sub>)<sub>3</sub>(THF)<sub>2</sub> (0.91 g, 1.84 mmol) in 7.0 mL of THF at room temperature. Then 4.0 mL of *n*-hexane was added, and the resulting mixture was stirred vigorously for 2 min before being allowed to stand still for 12 h. During this course, crystals precipitated and were collected by filtration, washed with 3 mL of *n*-hexane, and dried in *vacuo*. Yield: 155 mg (89%). <sup>1</sup>H NMR (C<sub>6</sub>D<sub>6</sub>): δ 7.47 (d, *J* = 7.8 Hz, 3H, Ph), 7.30–7.26 (m, 1H), 7.22 (d, *J* = 1.5 Hz, 1H), 7.20 (s, 2H), 7.18 (d, *J* = 1.5 Hz, 1H Ph), 6.97 (t, *J* = 1.0 Hz, 1H), 6.76–6.65 (m, 1H, Py), 6.72–6.67 (m, 1H, Py), 6.61 (dd, *J* = 3.0, 1.5 Hz, 2H, Py), 6.58 (t, *J* = 2.5 Hz, 2H, Py), 6.15 (s, 2H, Py), 3.64 (s, 8H, THF), 2.42 (s, 3H, NMe), 1.336 (s, 8H, THF), -0.07 (s, 9H, SiMe<sub>3</sub>), -1.09 (s, 2H, CH<sub>2</sub>SiMe<sub>3</sub>) ppm. <sup>13</sup>C{<sup>1</sup>H} NMR (C<sub>6</sub>D<sub>6</sub>): δ 149.8 (Ph), 148.9, 145.4, 144.2, 130.2, 129.6, 128.4, 127.5, 127.1 (Ph), 127.2 (Ph), 113.6 (Py), 110.6 (Py), 108.4 (Py), 68.9 (THF), 58.2 (CPh<sub>2</sub>), 35.9 (Lu-CH<sub>2</sub>SiMe<sub>3</sub>), 35.5 (NMe), 25.6 (THF), 4.5 (SiMe<sub>3</sub>) ppm. Anal. Calcd for C<sub>51</sub>H<sub>58</sub>N<sub>3</sub>O<sub>2</sub>SiLu: C, 64.61; H, 6.17; N, 4.43. Found: C, 64.36; H, 6.51; N, 4.03.

#### **Preparation of 2a' from 3a' and Ph<sub>2</sub>CN<sub>2</sub>**

To a clear colorless solution of 3a' (100 mg, 0.100 mmol) in 1.5 mL of toluene was added a brown solution of Ph<sub>2</sub>CN<sub>2</sub> (19 mg, 0.174 mmol) in 1.5 mL of toluene at room temperature. Then 100 μL of THF was added. During the process, the color of the solution changed to deep red slowly. After 5 h, 4.5 mL of *n*-hexane was added and the resulting mixture was stirred vigorously for 2 min before being allowed to stand still. Red crystals appeared and dried in *vacuum*. Yield: 104 mg (90%).

#### **Preparation of 2a' from 4a' and Ph<sub>2</sub>CN<sub>2</sub>:**

To a clear colorless solution of 4a' (91 mg, 0.100 mmol) in 1.5 mL of toluene was added a brown solution of Ph<sub>2</sub>CN<sub>2</sub> (19 mg, 0.100 mmol) in 1.5 mL of toluene at room temperature. During the process, the color of the solution changed to deep red slowly. After 3 h, 4.5 mL of *n*-hexane was added and the resulting mixture was stirred vigorously for 2 min before being allowed to stand still. Red crystals appeared and dried in *vacuum*. Yield: 105 mg (91%).

#### **Preparation of 2b-2j**

Under an argon atmosphere, to a clear colorless solution of the complex **1** (0.174 mmol) in 1.5 mL of toluene was added a clear solution of imine (0.174 mmol) in 1.5 mL of toluene and the mixture was stirred at room temperature for 3 h. During this course, the color of the solution changed to green slowly. Then Ph<sub>2</sub>CN<sub>2</sub> (33 mg, 0.174 mmol) and a suitable amount of *n*-hexane were added, the color of the solution changes from green to red and finally to dark red. Red crystals were obtained by standing the solution at room temperature for several hours.

**Preparation of 2b.** The complex **2b** was isolated as red crystals by treatment of **1a** (150 mg, 0.174 mmol) with PhCH=NPh (31 mg, 0.174 mmol) and Ph<sub>2</sub>CN<sub>2</sub> (33 mg, 0.174 mmol) following the same procedure as that described above. Yield: 187 mg (90%). <sup>1</sup>H NMR (THF-*d*<sub>8</sub>): δ 7.86 (s, 1H, imine *H*), 7.73 (d, *J* = 7.0 Hz, 2H, Ph), 7.34 (s, 2H), 7.28–7.24 (m, 6H), 7.21 (d, *J* = 7.5 Hz, 3H), 7.15–7.09 (m, 8H), 7.08–7.04 (m, 7H), 7.01 (d, *J* = 7.0 Hz, 2H), 6.98 (d, *J* = 7.5 Hz, 3H), 6.81 (d, *J* = 7.5 Hz, 1H), 6.74 (d, *J* = 7.5 Hz, 2H), 6.58 (s, 2H), 6.44 (d, *J* = 7.0 Hz, 1H, Ph), 5.93 (s, 2H, Py), 5.82 (d, *J* = 7.5 Hz, 2H, Py), 5.66 (s, 2H, Py), 4.94 (s, 2H, Py), 2.16 (s, 3H, *NMe*) ppm. <sup>13</sup>C{<sup>1</sup>H} NMR (THF-*d*<sub>8</sub>): δ 163.9 (CH=N), 162.0 (NN-*C*<sub>aryl</sub>), 152.1 (Ph), 151.2, 150.1, 149.0, 143.7, 138.6, 137.1, 133.7, 133.5, 131.6, 129.4, 129.2, 128.7, 128.3, 128.1, 127.9, 127.6, 127.4, 127.0, 126.3, 126.1, 125.9, 125.6, 124.9, 121.5, 120.7 (Ph), 117.4 (Py), 115.2, 114.4, 112.4, 110.9, 107.7, 106.2 (Py), 57.2 (CPh<sub>2</sub>), 34.9 (*NMe*) ppm. Anal. Calcd for C<sub>65</sub>H<sub>51</sub>N<sub>6</sub>Y·C<sub>7</sub>H<sub>8</sub>: C, 78.82; H, 5.42; N, 7.66. Found: C, 78.85; H, 5.37; N, 7.34.

**Preparation of 2b'.** The complex **2b'** was isolated as red crystals by treatment of **1a'** (168 mg, 0.174 mmol) with PhCH=NPh (31 mg, 0.174 mmol) and Ph<sub>2</sub>CN<sub>2</sub> (33 mg, 0.174 mmol) following the same procedure as that described above. Yield: 173 mg (91%). <sup>1</sup>H NMR (THF-*d*<sub>8</sub>): δ 7.84 (s, 1H, imine *H*), 7.79 (d, *J* = 3.5 Hz, 2H, Ph), 7.46 (s, 1H), 7.44 (s, 1H), 7.36–7.32 (m, 3H), 7.24–7.18 (m, 8H), 7.14–7.09 (m, 15H), 7.02 (s, 1H), 7.00 (s, 1H), 6.96 (d, *J* = 7.0 Hz, 1H), 6.91 (d, *J* = 7.0 Hz, 2H), 6.77 (t, *J* = 7.5 Hz, 1H), 6.69 (t, *J* = 7.5 Hz, 2H, Ph), 6.47–6.44 (m, 1H), 5.97 (s, 2H, Py), 5.67 (s, 4H, Py), 5.05 (s, 1H, Py), 4.61 (s, 1H, Py), 2.14 (s, 3H, *NMe*) ppm. <sup>13</sup>C{<sup>1</sup>H} NMR (THF-*d*<sub>8</sub>): δ 164.1 (CH=N), 163.2 (NN-*C*<sub>aryl</sub>), 153.0 (Ph), 151.2, 149.7, 149.1, 143.6, 138.2, 135.9, 135.5, 134.1, 129.4, 129.1, 128.8, 128.3, 128.2, 127.9, 127.6, 127.4, 127.3, 127.0, 126.3, 126.1, 126.0, 124.6 (Ph), 115.1 (Py), 114.0, 113.0, 107.9, 106.2 (Py), 57.0 (CPh<sub>2</sub>), 34.4 (*NMe*) ppm. Anal. Calcd for C<sub>65</sub>H<sub>51</sub>N<sub>6</sub>Lu: C, 71.55; H, 4.71; N, 7.70. Found: C, 71.93; H, 5.19; N, 7.54.

**Preparation of 2c.** To a clear colorless solution of **5c** (150 mg, 0.164 mmol) in 3.0 mL of toluene was added a clear colorless solution of Ph<sub>2</sub>CN<sub>2</sub> (35 mg, 0.164 mmol) in 1.5 mL of toluene at room temperature. The mixture was stirred for 1 h and the color of the solution changed to dark red slowly. Then 2.0 mL of *n*-hexane was added and red crystals appeared after standing the

solution at room temperature for 24 h. Yield: 165 mg (92%).  $^1\text{H}$  NMR (THF- $d_8$ ):  $\delta$  7.83 (s, 1H, imine *H*), 7.74 (d,  $J = 7.5$  Hz, 2H, Ph), 7.36–7.25 (m, 8H), 7.24–7.19 (m, 4H), 7.14–7.07 (m, 13H), 7.03–6.96 (m, 5H), 6.58 (s, 3H), 6.42 (t,  $J = 7.3$  Hz, 1H), 6.28 (d,  $J = 8.5$  Hz, 2H, Ph), 5.92 (s, 2H, Py), 5.72 (d,  $J = 8.0$  Hz, 2H, Py), 5.65 (s, 2H, Py), 4.92 (s, 2H, Py), 3.56 (s, 3H, *OMe*), 2.15 (s, 3H, *NMe*) ppm.  $^{13}\text{C}\{^1\text{H}\}$  NMR (THF- $d_8$ ):  $\delta$  163.3 (CH=N), 160.0, 157.2 (NN- $C_{\text{aryl}}$ ), 151.9 (Ph), 150.0, 149.1, 143.8, 143.7, 143.0, 138.6, 135.3, 133.5, 129.5, 129.2, 128.8, 128.7, 128.3, 128.1, 127.6, 127.5, 127.4, 127.0, 126.7, 126.1, 125.9, 125.6, 124.7, 122.2 (Ph), 114.9 (Py), 114.1, 113.8, 113.1, 107.6, 106.1 (Py), 57.2 ( $C\text{Ph}_2$ ), 54.3 (*OMe*), 34.3 (*NMe*) ppm. Anal. Calcd for  $\text{C}_{66}\text{H}_{53}\text{N}_6\text{OY}\cdot 0.5\text{C}_6\text{H}_{11}$ : C, 76.87; H, 5.61; N, 7.79. Found: C, 76.72; H, 6.07; N, 7.32.

**Preparation of 2c'.** The complex **2c'** was isolated as pale red crystals by treatment of **1a'** (168 mg, 0.174 mmol) with *p*-MeOC<sub>6</sub>H<sub>4</sub>N=CHPh (37 mg, 0.174 mmol) and Ph<sub>2</sub>CN<sub>2</sub> (33 mg, 0.174 mmol) following the same procedure as that described above. Yield: 177 mg (91%).  $^1\text{H}$  NMR (THF- $d_8$ ):  $\delta$  7.82 (s, 1H, imine *H*), 7.79 (d,  $J = 3.5$  Hz, 2H, Ph), 7.46 (d,  $J = 8.5$  Hz, 2H), 7.36–7.32 (m, 4H, Ph), 7.23–7.20 (m, 7H, Ph), 7.15 (d,  $J = 7.5$  Hz, 5H), 7.13–7.09 (m, 8H), 7.01 (m, 3H), 6.91 (d,  $J = 7.5$  Hz, 2H), 6.71–6.66 (m, 1H), 6.51–6.43 (m, 2H), 6.23 (d,  $J = 8.5$  Hz, 2H, Ph), 5.96 (s, 2H, Py), 5.67 (s, 2H, Py), 5.58 (d,  $J = 7.6$  Hz, 2H, Py), 5.02 (s, 1H, Py), 4.65 (s, 1H, Py), 3.56 (s, 3H, *OMe*), 2.13 (s, 3H, *NMe*) ppm.  $^{13}\text{C}\{^1\text{H}\}$  NMR (THF- $d_8$ ):  $\delta$  163.6 (CH=N), 160.6, 157.1 (NN- $C_{\text{aryl}}$ ), 152.9, 149.6, 149.1, 143.8, 138.3, 137.1, 136.0, 135.4, 133.8, 129.5, 129.2, 129.1, 128.9, 128.3, 128.2, 127.4, 126.7, 126.2, 126.1, 126.0, 122.6, 121.7, 117.3, 115.2, 113.9, 113.7, 113.1 (Py), 113.0 (Py), 108.6 (Py), 106.2 (Py), 57.0 ( $C\text{Ph}_2$ ), 54.2 (*OMe*), 34.4 (*NMe*) ppm. Anal. Calcd for  $\text{C}_{66}\text{H}_{53}\text{N}_6\text{OLu}\cdot 0.5\text{C}_7\text{H}_8$ : C, 71.52; H, 4.92; N, 7.20. Found: C, 71.66; H, 5.41; N, 6.81.

**Preparation of 2d.** The complex **2d** was isolated as deep red crystals by treatment of **1a** (150 mg, 0.174 mmol) with *p*-MeOC<sub>6</sub>H<sub>4</sub>CH=NPh (37 mg, 0.174 mmol) and Ph<sub>2</sub>CN<sub>2</sub> (33 mg, 0.174 mmol) following the same procedure as that described above. Yield: 167 mg (93%).  $^1\text{H}$  NMR (THF- $d_8$ ):  $\delta$  7.80 (dd,  $J = 6.5, 2.7$  Hz, 2H), 7.68 (s, 1H, imine *H*), 7.37 (s, 2H, Ph), 7.34–7.32 (m, 3H, Ph), 7.20–7.17 (m, 5H), 7.13–7.05 (m, 14H), 7.03–7.00 (m, 5H), 6.96 (t,  $J = 7.0$  Hz, 1H), 6.78–6.74 (m, 2H), 6.70 (d,  $J = 7.7$  Hz, 2H), 6.57 (s, 2H, Ph), 6.11 (dd,  $J = 9.0, 2.5$  Hz, 1H, Py), 5.92 (s, 1H, Py), 5.73 (d,  $J = 7.5$  Hz, 2H, Py), 5.65 (s, 2H, Py), 4.94 (s, 2H, Py), 3.67 (s, 3H, *OMe*), 2.14 (s, 3H, *NMe*) ppm.  $^{13}\text{C}\{^1\text{H}\}$  NMR (THF- $d_8$ ):  $\delta$  165.0 (CH=N), 162.7, 162.0 (NN- $C_{\text{aryl}}$ ), 154.1 (Ph), 151.3 (Ph), 149.9, 149.0, 143.6, 138.3, 137.8, 135.7, 129.4, 129.1, 129.0, 128.5, 128.1, 127.8, 127.6, 127.3, 126.9, 126.9, 126.7, 126.3, 125.9, 125.6, 124.6, 124.2, 121.4 (Ph), 120.6 (Ph), 108.5 (Py), 106.1 (Py), 106.0 (Py), 94.0, 57.1 ( $C\text{Ph}_2$ ), 53.9 (*OMe*), 34.3 (*NMe*) ppm. Anal. Calcd for  $\text{C}_{66}\text{H}_{53}\text{N}_6\text{OY}\cdot 1.5\text{C}_7\text{H}_8$ : C, 78.31; H, 5.58; N, 7.16. Found: C, 77.80; H, 5.79; N, 6.94.

**Preparation of 2d'.** The complex **2d'** was isolated as deep red crystals by treatment of **1a'** (168 mg, 0.174 mmol) with *p*-MeOC<sub>6</sub>H<sub>4</sub>CH=NPh (37 mg, 0.174 mmol) and Ph<sub>2</sub>CN<sub>2</sub> (33 mg, 0.174 mmol) following the same procedure as that described above. Yield: 175 mg (90%). <sup>1</sup>H NMR (THF-*d*<sub>8</sub>): δ 7.82 (s, 2H), 7.71 (s, 1H, imine *H*), 7.56 (s, 1H), 7.47 (s, 1H), 7.35 (d, *J* = 3.5 Hz, 1H), 7.27–7.16 (m, 11H), 7.14–7.06 (m, 8H), 7.00–6.98 (m, 6H), 6.94 (d, *J* = 7.0 Hz, 3H), 6.72 (d, *J* = 6.5 Hz, 1H), 6.64 (s, 2H), 6.49 (d, *J* = 7.0 Hz, 1H), 6.27 (s, 1H), 6.16–6.12 (m, 1H, Py), 6.03 (s, 1H, Py), 5.88 (s, 1H, Py), 5.74 (s, 1H, Py), 5.58 (s, 2H, Py), 5.03 (s, 1H, Py), 4.44 (s, 1H, Pyr*H*), 3.69 (s, 3H, OMe), 2.12 (s, 3H, NMe) ppm. <sup>13</sup>C{<sup>1</sup>H} NMR (THF-*d*<sub>8</sub>): δ 165.0 (CH=N), 163.4, 162.7 (NN-C<sub>aryl</sub>), 155.0 (Ph), 149.5 (Ph), 143.3, 138.1, 137.6, 135.8, 129.4, 129.2, 128.7, 128.1, 127.6, 127.4, 127.3, 127.1, 126.7, 126.1, 125.9, 124.1, 121.8 (Ph), 120.5 (Ph), 108.1 (Py), 106.2 (Py), 94.5 (Py), 56.9 (CPh<sub>2</sub>), 53.9 (OMe), 34.3 (NMe) ppm. Anal. Calcd for C<sub>66</sub>H<sub>53</sub>N<sub>6</sub>OLu·1.5C<sub>7</sub>H<sub>8</sub>: C, 72.96; H, 5.20; N, 6.67. Found: C, 72.68; H, 5.10; N, 6.30.

**Preparation of 2e.** The complex **2e** was isolated as red crystals by treatment of **1a** (150 mg, 0.174 mmol) with *p*-FC<sub>6</sub>H<sub>4</sub>CH=NPh (35 mg, 0.174 mmol) and Ph<sub>2</sub>CN<sub>2</sub> (33 mg, 0.174 mmol) following the same procedure as that described above. Yield: 148 mg (83%). <sup>1</sup>H NMR (THF-*d*<sub>8</sub>): δ 7.82 (s, 1H, imine *H*), 7.80–7.76 (m, 2H, Ph), 7.35 (d, *J* = 5.5 Hz, 5H, Ph), 7.23–7.17 (m, 8H), 7.15–7.08 (m, 12H), 7.03–6.98 (m, 4H), 6.82–6.80 (m, 1H), 6.73 (t, *J* = 7.5 Hz, 2H), 6.60–6.51 (m, 3H), 6.25–6.21 (m, 1H, Ph), 5.94 (s, 2H, Py), 5.74 (d, *J* = 7.5 Hz, 2H, Py), 5.67 (s, 2H, Py), 4.87 (s, 2H, Py), 2.16 (s, 3H, NMe) ppm. <sup>13</sup>C{<sup>1</sup>H} NMR (THF-*d*<sub>8</sub>): δ 167.1 (d, *J*<sub>F-C</sub> = 253.3 Hz), 163.9 (CH=N), 162.7 (NN-C<sub>aryl</sub>), 161.0 (Ph), 154.1 (d, *J*<sub>F-C</sub> = 11.4 Hz), 150.8 (Ph), 150.2, 149.9, 145.6, 143.5, 143.1, 138.9 (d, *J*<sub>F-C</sub> = 12.6 Hz), 138.1, 135.6, 130.0, 129.4, 129.3, 129.1, 129.0, 128.4, 128.2, 127.9, 127.8, 127.7, 127.4, 127.0, 127.6, 126.5, 126.1, 126.0, 125.4, 125.1, 124.9, 124.8, 121.5 (Ph), 120.6 (Ph), 111.2, 107.8, 106.3 (Py), 105.1 (Py), 103.5 (Py), 103.3, 98.7, 98.6, 57.2 (CPh<sub>2</sub>), 34.5 (NMe) ppm. <sup>19</sup>F NMR (471 MHz, THF-*d*<sub>8</sub>): δ -103.97 (s). Anal. Calcd for C<sub>65</sub>H<sub>50</sub>N<sub>6</sub>FY·1.5C<sub>7</sub>H<sub>8</sub>: C, 77.55; H, 5.24; N, 7.54. Found: C, 77.88; H, 5.54; N, 7.82.

**Preparation of 2f.** The complex **2f** was isolated as red crystals by treatment of **1a** (150 mg, 0.174 mmol) with PhCH=NC<sub>6</sub>H<sub>11</sub> (33 mg, 0.174 mmol) and Ph<sub>2</sub>CN<sub>2</sub> (33 mg, 0.174 mmol) following the same procedure as that described above. Yield: 158 mg (90%). <sup>1</sup>H NMR (THF-*d*<sub>8</sub>): δ 7.90 (s, 1H, imine *H*), 7.41 (d, *J* = 7.0 Hz, 2H, Ph), 7.24 (s, 4H, Ph), 7.13 (d, *J* = 8.0 Hz, 3H, Ph), 7.11–7.06 (m, 5H), 7.02–6.07 (m, 10H), 6.94 (d, *J* = 7.0 Hz, 3H), 6.83–6.75 (m, 7H, Ph), 6.28 (t, *J* = 7.5 Hz, 1H, Py), 5.98 (s, 5H, Py), 5.68 (t, *J* = 2.5 Hz, 2H, Py), 2.82 (s, 1H, Cy), 2.22 (s, 3H, NMe), 1.53 (s, 2H, Cy), 1.45 (s, 1H, Cy), 1.13 (s, 1H, Cy), 1.11 (s, 1H, Cy), 0.99 (s, 5H, Cy) ppm. <sup>13</sup>C{<sup>1</sup>H} NMR (THF-*d*<sub>8</sub>): δ 160.8 (CH=N), 160.5 (NN-C<sub>aryl</sub>), 150.0 (Ph), 149.6 (Ph), 148.9, 144.3, 142.5, 139.6, 136.4, 132.2, 131.2, 130.3, 129.5, 129.3, 128.8, 128.3, 127.9, 127.3, 127.0, 126.9, 126.1, 125.9, 125.8 (Ph), 117.1, 116.4, 115.2, 112.2 (Py), 109.3 (Py), 107.5 (Py), 105.7

(Cy), 70.0 (Cy), 63.7 (Cy), 57.4 (CPh<sub>2</sub>), 34.9 (NMe), 33.1 (Cy) ppm. Anal. Calcd for C<sub>65</sub>H<sub>57</sub>N<sub>6</sub>Y·2C<sub>7</sub>H<sub>8</sub>: C, 79.38; H, 6.16; N, 7.03. Found: C, 79.35; H, 6.35; N, 7.48.

**Preparation of 2g.** The complex **2g** was isolated as deep red crystals by treatment of **1a** (150 mg, 0.174 mmol) with PhMeC=NPh (34 mg, 0.174 mmol) and Ph<sub>2</sub>CN<sub>2</sub> (33 mg, 0.174 mmol) following the same procedure as that described above. Yield: 158 mg (90%). <sup>1</sup>H NMR (THF-*d*<sub>8</sub>): δ 8.25 (s, 1H, Ph), 8.09 (d, *J* = 7.0 Hz, 1H, Ph), 7.98 (d, *J* = 7.5 Hz, 1H, Ph), 7.90 (s, 1H), 7.49 (s, 1H), 7.33 (d, *J* = 7.5 Hz, 1H), 7.26–7.18 (m, 3H), 7.15–7.12 (m, 6H), 7.02 (s, 8H), 6.90 (s, 2H), 6.67 (s, 3H), 6.62 (m, 6H), 6.55 (t, *J* = 7.3 Hz, 3H), 6.50–6.47 (m, 2H, Ph), 6.17 (d, *J* = 7.5 Hz, 2H, Py), 5.49 (s, 2H, Py), 5.32 (s, 2H, Py), 4.46 (s, 2H, Py), 2.68 (s, 3H, NMe), 2.32 (s, 3H, N=CMe) ppm. <sup>13</sup>C{<sup>1</sup>H} NMR (THF-*d*<sub>8</sub>): δ 170.9 (CH=N), 160.8 (NN-C<sub>aryl</sub>), 151.6 (Ph), 151.1 (Ph), 150.8, 147.4, 139.6, 138.1, 137.9, 133.9, 131.6, 130.5, 130.4, 130.1, 129.5, 129.4, 129.3, 129.1, 128.6, 127.2, 127.0, 126.9, 126.4, 125.7, 125.3 (Ph), 123.4 (Ph), 118.0, 117.9, 115.2 (Py), 107.8 (Py), 58.1 (Ph<sub>2</sub>C), 35.6 (NMe), 32.0 (N=CMe) ppm. Anal. Calcd for C<sub>66</sub>H<sub>53</sub>N<sub>6</sub>Y: C, 77.79; H, 5.24; N, 8.25. Found: C, 77.72; H, 5.55; N, 7.88.

**Preparation of 2h.** The complex **2h** was isolated as deep red crystals by treatment of **1a** (150 mg, 0.174 mmol) with Ph<sub>2</sub>C=NPh (45 mg, 0.174 mmol) and Ph<sub>2</sub>CN<sub>2</sub> (33 mg, 0.174 mmol) following the same procedure as that described above. Yield: 175 mg (93%). <sup>1</sup>H NMR (THF-*d*<sub>8</sub>): δ 7.76–7.73 (m, 2H, Ph), 7.50 (s, 1H, Ph), 7.34–7.28 (m, 7H), 7.23–7.00 (m, 6H), 7.13–7.02 (m, 12H), 6.85 (d, *J* = 8.5 Hz, 2H), 6.54 (s, 6H), 6.43–6.38 (m, 3H), 6.23 (d, *J* = 7.0 Hz, 1H), 6.06–6.03 (m, 1H, Ph), 5.92 (s, 3H, Ph), 5.67 (s, 2H, Py), 5.32 (d, *J* = 6.5 Hz, 3H, Py), 4.39 (s, 2H, Py), 4.11 (m, 1H, Py), 2.17 (s, 3H, NMe) ppm. <sup>13</sup>C{<sup>1</sup>H} NMR (THF-*d*<sub>8</sub>): δ 171.3 (CH=N), 160.3 (NN-C<sub>aryl</sub>), 151.8 (Ph), 149.9 (Ph), 146.3, 138.8, 136.8, 134.4, 132.7, 130.0, 129.3, 129.1, 128.7, 128.4, 128.3, 127.9, 127.6, 127.5, 127.3, 127.2, 127.1, 126.8, 126.5, 126.1, 126.0, 125.7 (Ph), 123.9 (Ph), 116.1, 115.6, 113.3 (Py), 106.0 (Py), 105.0 (Py), 57.1 (CPh<sub>2</sub>), 34.6 (NMe) ppm. Anal. Calcd for C<sub>71</sub>H<sub>55</sub>N<sub>6</sub>Y: C, 78.88; H, 5.13; N, 7.77. Found: C, 78.72; H, 5.35; N, 7.31.

**Preparation of 2i.** The complex **2i** was isolated as red crystals by treatment of **1a** (150 mg, 0.174 mmol) with C<sub>4</sub>H<sub>3</sub>SCH=NPh (33 mg, 0.174 mmol) and Ph<sub>2</sub>CN<sub>2</sub> (33 mg, 0.174 mmol) following the same procedure as that described above. Yield: 171 mg (89%). <sup>1</sup>H NMR (THF-*d*<sub>8</sub>): δ 7.74 (dd, *J* = 7.0, 2.5 Hz, 2H, Ph), 7.67 (s, 1H, imine *H*), 7.66 (s, 1H, Ph), 7.35–7.31 (m, 3H), 7.20 (m, 8H), 7.14 (s, 4H), 7.11–7.06 (m, 6H), 7.05 (d, *J* = 4.0 Hz, 2H), 7.03–6.99 (m, 3H), 6.97 (d, *J* = 7.5 Hz, 1H), 6.65 (m, 4H, Ph), 6.58 (s, 3H, Ph), 5.93 (s, 2H, Py), 5.72–5.61 (m, 4H, Py), 4.97 (s, 1H, Py), 4.66 (s, 1H, Pyr*H*), 2.13 (s, 3H, NMe) ppm. <sup>13</sup>C{<sup>1</sup>H} NMR (C<sub>6</sub>D<sub>6</sub>): δ 162.5 (CH=N), 158.3 (NN-C<sub>aryl</sub>), 151.5 (Ph), 150.5 (Ph), 143.5, 138.3, 138.0, 135.1, 129.7, 129.4, 128.6, 127.9, 127.6, 127.9, 127.3, 126.9, 126.1, 126.0, 123.4 (Ph), 120.9 (Ph), 118.0 (Py), 106.1 (Py), 104.1

(Py), 57.1(CPh<sub>2</sub>), 34.3 (NMe) ppm. Anal. Calcd for C<sub>63</sub>H<sub>49</sub>N<sub>6</sub>SY·C<sub>7</sub>H<sub>8</sub>: C, 76.21; H, 5.21; N, 7.62. Found: C, 76.11; H, 5.37; N, 7.44.

**Preparation of 2j.** To a clear yellow solution of **7j** (149 mg, 0.174 mmol) in 2.0 mL of toluene was added a clear brown solution of Ph<sub>2</sub>CN<sub>2</sub> (33 mg, 0.174 mmol) in 2.0 mL of toluene at room temperature. Then 3.0 mL of *n*-hexane was added and the resulting mixture was stirred vigorously for 2 min before being allowed to stand still for 24 h. Red crystals were appeared and dried in *vacuum*. Yield: 164 mg (88%). <sup>1</sup>H NMR (THF-*d*<sub>8</sub>): δ 8.40 (d, *J* = 1.5 Hz, 1H, Ph), 7.59 (dd, *J* = 7.5, 6.5 Hz, 1H, Ph), 7.36 (s, 2H), 7.30 (dd, *J* = 7.0, 2.0 Hz, 3H), 7.24–7.17 (m, 6H), 7.10–7.06 (m, 9H), 7.01–6.99 (m, 4H), 6.97 (s, 1H), 6.82 (t, *J* = 7.0 Hz, 2H), 6.79–6.75 (m, 2H), 6.74–6.70 (m, 2H), 6.67 (d, *J* = 7.0 Hz, 1H), 6.61–6.56 (m, 2H), 6.52 (t, *J* = 7.5 Hz, 2H), 6.28 (t, *J* = 7.0 Hz, 2H), 6.15 (d, *J* = 2.0 Hz, 1H), 6.09 (d, *J* = 2.5 Hz, 1H), 6.05–6.02 (m, 1H), 5.45 (d, *J* = 3.5 Hz, 1H), 5.26 (d, *J* = 3.0 Hz, 1H), 5.10 (d, *J* = 8.0 Hz, 1H), 2.14 (s, 3H, NMe) ppm. <sup>13</sup>C{<sup>1</sup>H} NMR (THF-*d*<sub>8</sub>): δ 157.9 (NN-C<sub>aryl</sub>), 149.6 (Ph), 149.0 (Ph), 148.4, 147.8, 147.2, 146.4, 145.6, 145.1, 142.7, 142.2, 141.6, 141.3, 138.9, 130.6, 130.1, 129.8, 129.2, 128.0, 127.0, 126.9, 126.8, 126.2, 126.1, 126.0, 125.9, 125.7, 125.5, 125.2, 124.9, 124.4, 124.1 (Ph), 120.2 (Ph), 115.9, 115.5, 111.6, 108.4, 108.3, 107.9 (Py), 106.6 (Py), 106.3 (Py), 105.0 (Py), 57.4 (CPh<sub>2</sub>), 35.4 (NMe) ppm. Anal. Calcd for C<sub>63</sub>H<sub>49</sub>N<sub>6</sub>Y: C, 77.29; H, 5.04; N, 8.58. Found: C, 77.20; H, 5.40; N, 8.05.

**Preparation of 3a'.** To a clear colorless solution of **1a'** (168 mg, 0.174 mmol) in 2.0 mL of toluene was added a clear brown solution of Ph<sub>2</sub>CN<sub>2</sub> (33 mg, 0.174 mmol) in 1.0 mL of toluene at room temperature. The mixture was stirred for 3 h and the color of the solution gradually changed from red to colorless. Then 1.5 mL of *n*-hexane was added and the resulting mixture was stirred vigorously for 2 min before being allowed to stand still for 24 h. White crystals were appeared and dried in *vacuo*. Yield: 108 mg (62%). <sup>1</sup>H NMR (C<sub>6</sub>D<sub>6</sub>): δ 7.33 (s, 2H, Ph), 7.27 (s, 3H, Ph), 7.05–7.00 (m, 10H, Ph), 6.95 (s, 6H), 6.91–6.87 (m, 5H, Ph), 6.82–6.80 (m, 4H), 6.78–6.74 (m, 2H, Py), 6.54 (d, *J* = 2.0 Hz, 2H, Py), 6.52–6.46 (m, 2H, Py), 5.35 (d, *J* = 3.0 Hz, 2H, Py), 3.22 (s, 2H, CH<sub>2</sub>SiMe<sub>3</sub>), 2.46 (s, 3H, NMe), -0.16 (s, 9H, CH<sub>2</sub>SiMe<sub>3</sub>) ppm. <sup>13</sup>C{<sup>1</sup>H} NMR (C<sub>6</sub>D<sub>6</sub>): δ 151.5 (imine C), 149.8 (Ph), 144.5 (Ph), 143.5, 143.2, 137.9, 136.2, 131.2, 129.8, 129.6, 128.8, 127.4, 127.3, 127.2, 127.1 (Ph), 126.2 (Ph), 111.8, 110.5, 109.0, 58.5 (CPh<sub>2</sub>), 50.1 (CH<sub>2</sub>SiMe<sub>3</sub>), 36.7 (NMe), -1.5 (CH<sub>2</sub>SiMe<sub>3</sub>) ppm. Anal. Calcd for C<sub>56</sub>H<sub>52</sub>N<sub>5</sub>SiLu: C, 67.39; H, 5.25; N, 7.02. Found: C, 67.01; H, 5.24; N, 7.03.

**Preparation of 4a'.** To a clear colorless solution of **1a'** (168 mg, 0.174 mmol) in 2.0 mL of toluene was added a clear colorless solution of Ph<sub>2</sub>C=NH (30.3 μL, 0.174 mmol) in 1.0 mL of toluene at room temperature. The mixture was stirred for 3 h and the color of the solution

changed from colorless to red. Then 2.5 mL of *n*-hexane was added and the resulting mixture was stirred vigorously for 2 min before being allowed to stand still for 24 h. Yellow crystals were appeared and dried in *vacuo*. Yield: 39 mg (22%).  $^1\text{H}$  NMR ( $\text{C}_6\text{D}_6$ ):  $\delta$  7.45 (s, 3H, Ph), 7.27 (s, 5H, Ph), 7.20 (d,  $J = 6.5$  Hz, 3H, Ph), 7.14–7.11 (m, 8H), 7.08–7.07 (m, 6H), 7.05–7.04 (m, 5H, Ph), 7.02 (s, 1H, Py), 7.01 (s, 1H, Py), 6.75–6.71 (m, 2H, Py), 6.65 (s, 2H, Py), 5.86 (s, 2H, Py), 3.74 (s, 4H, THF), 2.59 (s, 3H, *NMe*), 1.15 (s, 4H, THF) ppm.  $^{13}\text{C}\{^1\text{H}\}$  NMR ( $\text{C}_6\text{D}_6$ ):  $\delta$  165.8 (imine C), 149.8 (Ph), 148.6 (Ph), 145.3, 144.7, 143.1, 130.4, 129.6, 128.3, 126.9 (Ph), 126.8 (Ph), 112.5 (Py), 110.3 (Py), 108.5 (Py), 70.7 (THF), 58.5 ( $\text{CPh}_2$ ), 35.8 (*NMe*), 25.1 (THF) ppm. Anal. Calcd for  $\text{C}_{56}\text{H}_{49}\text{N}_4\text{OLu}$ : C, 69.41; H, 5.10; N, 5.78. Found: C, 69.28; H, 5.26; N, 5.52.

**Preparation of 5c.** To a clear colorless solution of **1a** (150 mg, 0.174 mmol) in 1.5 mL of toluene was added a clear colorless solution of *p*-MeOC<sub>6</sub>H<sub>4</sub>N=CHPh (37 mg, 0.174 mmol) in 1.5 mL of toluene at room temperature. The mixture was stirred for 5 h and the color of the solution changed to green slowly. Then 2.5 mL of *n*-hexane was added and green crystals appeared after standing the solution at room temperature for 12 h. The crystals were washed with 2.0 mL of cold *n*-hexane and dried in *vacuo*. Yield: 101 mg (63%).  $^1\text{H}$  NMR (THF-*d*<sub>8</sub>):  $\delta$  8.43 (d,  $J = 6.5$  Hz, 1H, Ph), 7.98 (s, 1H, imine H), 7.89 (s, 2H, Ph), 7.45 (s, 4H), 7.33–7.26 (m, 2H, Ph), 7.13–7.12 (m, 7H), 7.06–7.016 (m, 4H), 6.91–6.85 (m, 6H), 6.66 (d,  $J = 2.0$  Hz, 2H), 6.64 (dd,  $J = 5.0, 3.0$  Hz, 2H, Py), 6.52 (dd,  $J = 9.0, 2.5$  Hz, 2H, Py), 6.33–6.28 (m, 2H, Py), 5.76 (d,  $J = 2.5$  Hz, 2H, Py), 3.33 (s, 4H, THF), 3.24 (s, 3H, *OMe*), 2.62 (s, 3H, *NMe*), 1.13 (s, 4H, THF) ppm.  $^{13}\text{C}\{^1\text{H}\}$  NMR (THF-*d*<sub>8</sub>):  $\delta$  193.4 (d,  $J_{\text{Y-C}} = 59.9$  Hz), 180.3 (Ph), 158.4 (Ph), 150.6, 150.5, 149.9, 145.2, 145.0, 144.0, 143.4, 139.2, 133.1, 131.7, 130.5, 129.3, 128.6, 126.8, 126.5, 125.9 (Ph), 123.8 (Ph), 114.5, 110.6 (Py), 110.4 (Py), 109.6 (Py), 107.8, 70.0 (THF), 58.4 ( $\text{CPh}_2$ ), 55.1 (*OMe*), 36.7 (*NMe*), 25.2 (THF) ppm. Anal. Calcd for  $\text{C}_{57}\text{H}_{51}\text{N}_4\text{O}_2\text{Y}\cdot 0.5\text{C}_7\text{H}_8$ : C, 75.45; H, 6.18; N, 5.82. Found: C, 75.06; H, 5.79; N, 5.61.

**Preparation of 6.** The complex **6** was isolated as white crystals by treatment of **1a** (150 mg, 0.174 mmol) with 2-MeC<sub>6</sub>H<sub>4</sub>N=CHPh (34 mg, 0.174 mmol) following the same procedure as that described above for the preparation of **5c**. Yield: 157 mg (70%).  $^1\text{H}$  NMR ( $\text{C}_6\text{D}_6$ ):  $\delta$  7.34 (s, 2H, Ph), 7.33 (s, 2H, Ph), 7.23 (d,  $J = 5.5$  Hz, 3H), 7.22–7.21 (m, 2H), 7.20–7.18 (m, 3H), 7.18–7.17 (m, 3H), 7.16 (t,  $J = 1.5$  Hz, 2H), 7.15–7.12 (m, 5H), 7.11–7.10 (m, 2H), 7.10–7.07 (m, 2H), 7.06–7.05 (m, 1H), 7.04 (m, 1H), 7.02 (s, 1H, Ph), 7.00 (s, 1H, Py), 6.99 (s, 1H, Py), 6.57 (d,  $J = 3.0$  Hz, 2H, Py), 6.53 (t,  $J = 3.0$  Hz, 1H, Py), 6.49 (d,  $J = 3.0$  Hz, 1H, Py), 5.28–5.14 (m, 2H, Py), 4.78 (dd,  $J = 12.0, 3.5$  Hz, 1H, N-CHCH<sub>2</sub>SiMe<sub>3</sub>), 2.42 (s, 3H, *NMe*), 2.38 (s, 3H, *PhMe*), 1.37–1.34 (m, 1H, CH<sub>2</sub>SiMe<sub>3</sub>), 1.23–1.11 (m, 1H, CH<sub>2</sub>SiMe<sub>3</sub>), -0.25 (s, 9H, CH<sub>2</sub>SiMe<sub>3</sub>) ppm.  $^{13}\text{C}\{^1\text{H}\}$  NMR ( $\text{C}_6\text{D}_6$ ):  $\delta$  151.3 (Ph), 150.8 (Ph), 149.8 (Ph), 148.5, 147.8, 144.2, 144.0, 143.7, 143.5, 133.6, 130.3, 129.9, 128.9, 128.4, 127.2, 127.1, 126.9, 125.1, 124.2 (Ph), 112.5 (Ph), 111.7,



110.1, 110.0 (Py), 108.4 (Py), 108.2 (Py), 58.5 (CPh<sub>2</sub>), 58.4 (NCHCH<sub>2</sub>SiMe<sub>3</sub>), 36.1(NMe), 27.2 (Me), 20.0 (CH<sub>2</sub>SiMe<sub>3</sub>), -1.1 (CH<sub>2</sub>SiMe<sub>3</sub>) ppm. Anal. Calcd for C<sub>57</sub>H<sub>55</sub>N<sub>4</sub>SiY·C<sub>7</sub>H<sub>8</sub>: C, 76.47; H, 6.32; N, 5.57. Found: C, 76.16; H, 6.81; N, 5.63.

**Preparation of 7j.** To a clear colorless solution of **1a** (150 mg, 0.174 mmol) in 2.0 mL of toluene was added a clear colorless solution of 2-phenylpyridine (24.5  $\mu$ L, 0.174 mmol) in 2.0 mL of *n*-hexane at room temperature. The mixture was stirred for 2 h and the color of the solution changed to yellow slowly. Yellow crystals appeared after standing the solution at room temperature for 12 h and dried in *vacuo*. Yield: 121 mg (65%). <sup>1</sup>H NMR (THF-*d*<sub>8</sub>):  $\delta$  7.91 (d, *J* = 4.5 Hz, 1H, Ph), 7.71 (d, *J* = 8.5 Hz, 1H, Ph), 7.62–7.57 (m, 1H), 7.43 (d, *J* = 8.0 Hz, 1H), 7.33 (d, *J* = 8.0 Hz, 4H), 7.23 (t, *J* = 7.5 Hz, 2H), 7.09–6.85 (m, 4H), 7.00 (m, 6H), 7.00–6.91 (m, 6H), 6.83 (s, 2H), 6.73–6.68 (m, 1H), 6.48 (t, *J* = 7.0 Hz, 1H), 6.26 (d, *J* = 6.5 Hz, 1H), 6.16 (d, *J* = 2.0 Hz, 2H), 6.12 (s, 1H), 5.90 (s, 2H), 2.21 (s, 3H, NMe) ppm. <sup>13</sup>C{<sup>1</sup>H} NMR (THF-*d*<sub>8</sub>):  $\delta$  188.7 (d, *J*<sub>Y-C</sub> = 42.8 Hz), 164.8 (Ph), 150.8 (Ph), 148.2 (Ph), 148.1, 145.1, 143.8, 138.3, 137.5, 129.8, 128.3, 127.8, 126.8, 126.0, 125.5, 125.2, 124.0, 122.3 (Ph), 120.4 (Ph), 118.2, 110.8 (Py), 107.8 (Py), 106.3 (Py), 57.7 (CPh<sub>2</sub>), 34.9 (NMe) ppm. Anal. Calcd for C<sub>54</sub>H<sub>47</sub>N<sub>4</sub>OY·0.5C<sub>7</sub>H<sub>8</sub>: C, 76.48; H, 5.69; N, 6.20. Found: C, 76.25; H, 5.69; N, 5.71.

### Preparation of 8a-8j

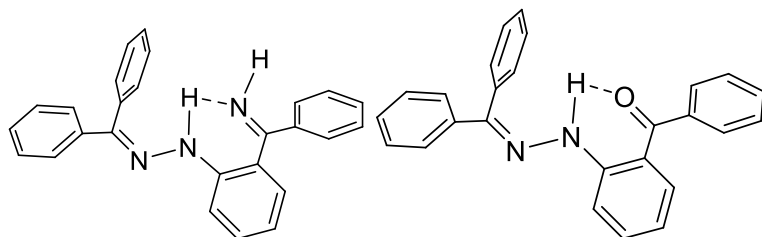

**8a**

**8a'**

**Preparation of 8a and 8a':** Red crystals of **2a** (0.10 mmol) were stirred in methanol (5 mL) at room temperature for 10 min to give a yellow mixture. After filtration, a clear yellow solution was evaporated under reduced pressure. The crude product was purified by column chromatography with ethyl acetate/petroleum ether (v/v = 1:20) to give the desired product as a yellow oil. Yield: (90%). Recrystallization from methanol afforded two different yellow crystals **8a** and **8a'**. <sup>1</sup>H NMR (C<sub>6</sub>D<sub>6</sub>):  $\delta$  13.19 (s, 1H, NH), 12.01 (s, 2H, NH), 8.95 (s, 1H), 8.49 (dd, *J* = 8.5, 1.0 Hz, 1H, Ph), 8.37 (dd, *J* = 8.5, 1.0 Hz, 2H, Ph), 7.91–7.87 (m, 2H, Ph), 7.86–7.81 (m, 4H), 7.38 (dd, *J* = 8.0, 1.5 Hz, 2H, Ph), 7.35–7.31 (m, 6H, Ph), 7.29–7.25 (m, 5H, Ph), 7.24–7.21 (m, 4H, Ph), 7.19–7.16 (m, 10H, Ph), 7.14–7.11 (m, 4H,

Ph), 7.03–6.99 (m, 2H, Ph), 6.99–6.96 (m, 1H, Ph), 6.94–6.90 (m, 5H, Ph), 6.83 (t,  $J = 1.5$  Hz, 1H, Ph), 6.81 (d,  $J = 1.5$  Hz, 1H, Ph), 6.54 (ddd,  $J = 8.0, 7.0, 1.0$  Hz, 1H, Ph), 6.48 (ddd,  $J = 8.0, 7.0, 1.0$  Hz, 2H, Ph).  $^{13}\text{C}\{^1\text{H}\}$  ( $\text{C}_6\text{D}_6$ ):  $\delta$  198.6 (C=O), 179.9 (C=N), 148.7 (Ph), 148.6 (Ph), 148.1 (Ph), 147.1, 142.6, 140.5, 139.4, 139.0, 135.7, 134.9, 134.7, 134.0, 133.8, 132.5, 130.8, 129.9, 129.6, 129.5, 129.3, 129.1, 128.8, 128.7, 128.6, 128.5, 128.4 (Ph), 127.6 (Ph), 127.4 (Ph), 117.8, 117.3, 114.8, 114.2 ppm.  $^1\text{H}$  NMR ( $\text{CDCl}_3$ ):  $\delta$  12.63 (s, 1H, NNHN), 11.45 (s, 2H, NNHO), 9.06 (s, 1H, C=NH), 8.08 (d,  $J = 1.0$  Hz, 1H), 8.06 (d,  $J = 1.0$  Hz, 1H), 8.05 (s, 1H), 7.69–7.62 (m, 9H), 7.58–7.53 (m, 4H), 7.52–7.45 (m, 9H), 7.40–7.32 (m, 19H), 7.25–7.22 (m, 1H), 7.06 (dd,  $J = 8.0, 1.5$  Hz, 1H), 6.72 (ddd,  $J = 8.0, 7.0, 1.0$  Hz, 2H), 6.65 (t,  $J = 7.5$  Hz, 1H).  $^{13}\text{C}\{^1\text{H}\}$  NMR ( $\text{CDCl}_3$ ):  $\delta$  199.2 (C=O), 180.1 (C=N), 148.4 (Ph), 148.3 (Ph), 147.4 (Ph), 147.1, 142.5, 140.4, 139.0, 138.8, 135.2, 134.9, 133.8, 132.4, 131.2, 130.1, 129.9, 129.8, 129.4, 129.3, 129.1, 128.9, 128.7, 128.6, 128.4, 127.6, 127.5 (Ph), 127.2 (Ph), 117.8, 117.4, 114.6, 113.8 ppm. HRMS (ESI):calcd for  $\text{C}_{26}\text{H}_{21}\text{N}_3$   $[\text{M}+\text{H}]^+$ : 376.1808, found 376.1806. HRMS (ESI):calcd for  $\text{C}_{26}\text{H}_{20}\text{N}_2\text{O}[\text{M}+\text{H}]^+$ : 377.1648, found 377.1651

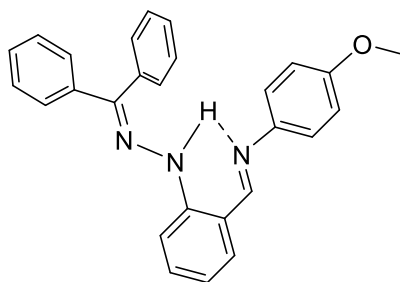

**8c**

**Preparation of 8c.** The compound of **8c** was isolated as red crystals by treatment of **2c** (0.10 mmol) with methanol (5 mL) following the same procedure as that described above for the preparation of **8a**. Yield: (92%).  $^1\text{H}$  NMR ( $\text{C}_6\text{D}_6$ ):  $\delta$  12.64 (s, 1H, NH), 8.39 (d,  $J = 8.5$  Hz, 1H, CH=N), 8.09 (s, 1H, Ph), 7.81 (t,  $J = 2.0$  Hz, 1H, Ph), 7.79 (d,  $J = 1.0$  Hz, 1H, Ph), 7.34 (s, 2H, Ph), 7.15–7.14 (m, 1H, Ph), 7.14–7.12 (m, 2H, Ph), 7.11–7.06 (m, 5H, Ph r), 6.77 (dd,  $J = 6.5, 1.5$  Hz, 2H, Ph), 6.75 (d,  $J = 2.0$  Hz, 1H, Ph), 6.49 (d,  $J = 2.0$  Hz, 1H, Ph), 6.47 (d,  $J = 2.0$  Hz, 1H, Ph), 3.37 (s, 3H, OMe) ppm.  $^{13}\text{C}\{^1\text{H}\}$  NMR ( $\text{C}_6\text{D}_6$ ):  $\delta$  193.3 (MeO- $\text{C}_{\text{aryl}}$ ), 161.0 (CH=N), 158.6 (NHN- $\text{C}_{\text{aryl}}$ ), 147.1 (Ph), 146.8 (Ph), 144.6 (Ph), 139.6, 135.2, 134.1, 132.4, 129.7, 129.6, 129.1, 128.9 (Ph), 127.5 (Ph), 112.7, 118.4, 118.1, 117.9, 114.1, 113.8, 55.0 (OMe) ppm. HRMS (ESI): calcd for  $\text{C}_{27}\text{H}_{23}\text{ON}_3$   $[\text{M}+\text{H}]^+$ : 406.1914, found 406.1920.

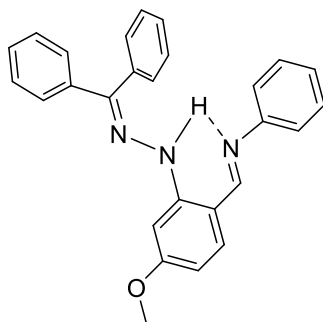

**8d**

**Preparation of 8d.** The compound of **8d** was isolated as yellow crystals by treatment of **2d** (0.10 mmol) with methanol (5 mL) following the same procedure as that described above for the preparation of **8a**. Yield: (93%).  $^1\text{H}$  NMR ( $\text{C}_6\text{D}_6$ ):  $\delta$  12.76 (s, 1H, NH), 8.01 (s, 1H, CH=N), 7.95 (d,  $J = 2.4$  Hz, 1H, Ph), 7.80 (s, 1H, Ph), 7.79 (s, 1H, Ph), 7.16–7.13 (m, 4H, Ph), 7.14–7.13 (m, 1H, Ph), 7.11–7.06 (m, 3H, Ph), 7.04 (dd,  $J = 5.5, 4.0$  Hz, 2H, Ph), 6.96 (d,  $J = 8.5$  Hz, 2H, Ph), 6.55 (s, 1H, Ph), 6.53 (s, 1H, Ph), 6.46 (dd,  $J = 8.5, 2.5$  Hz, 1H, Ph), 3.45 (s, 3H, OMe) ppm.  $^{13}\text{C}\{^1\text{H}\}$  NMR ( $\text{C}_6\text{D}_6$ ):  $\delta$  164.0 (MeO- $\text{C}_{\text{aryl}}$ ), 161.9 (CH=N), 151.9 (NHN- $\text{C}_{\text{aryl}}$ ), 148.8 (Ph), 147.7 (Ph), 139.4, 136.3, 135.1, 129.7, 129.4, 129.2, 128.5, 128.4, 127.5, 125.3 (Ph), 121.7 (Ph), 112.0, 106.5, 97.2, 54.9 (OMe) ppm. HRMS (ESI): calcd for  $\text{C}_{27}\text{H}_{23}\text{ON}_3$   $[\text{M}+\text{H}]^+$ : 406.1914, found 406.1911.

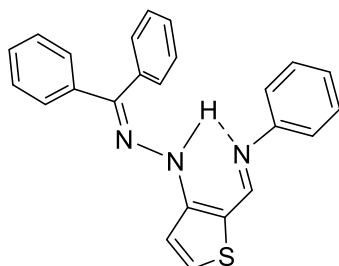

**8i**

**Preparation of 8i.** The compound of **8i** was isolated as red crystals by treatment of **2i** (0.10 mmol) with methanol (5 mL) following the same procedure as that described above for the preparation of **8a**. Yield: (91%).  $^1\text{H}$  NMR ( $\text{C}_6\text{D}_6$ ):  $\delta$  11.76 (s, 1H, NH), 8.02 (s, 1H, imine H), 7.81 (d,  $J = 1.5$  Hz, 1H, Ph), 7.79 (t,  $J = 1.5$  Hz, 1H, Ph), 7.69 (d,  $J = 5.5$  Hz, 1H), 7.24–7.20 (m, 3H), 7.19–7.15 (m, 7H), 7.11–7.07 (m, 1H), 6.98 (d,  $J = 5.5$  Hz, 1H), 6.59 (d,  $J = 1.5$  Hz, 1H), 6.58 (t,  $J = 1.5$  Hz, 1H) ppm.  $^{13}\text{C}\{^1\text{H}\}$  NMR ( $\text{C}_6\text{D}_6$ ):  $\delta$  181.7 (CH=N), 152.9 (Ph), 151.5 (Ph), 149.8, 147.0, 138.9, 134.4, 130.8, 129.8, 129.3, 129.2, 128.9, 128.5, 127.4 (Ph), 125.3 (Ph),

121.5 (Ph), 119.4, 111.1 ppm. HRMS (ESI): calcd for C<sub>24</sub>H<sub>19</sub>N<sub>3</sub>S[M+H]<sup>+</sup>: 382.1372, found 382.1367.

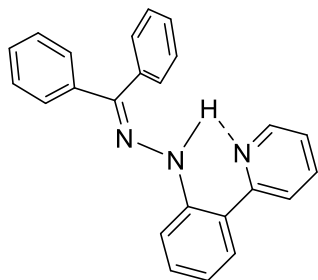

**8j**

**Preparation of 8j.** The compound of **8j** was isolated as yellow crystals by treatment of **2j** (0.10 mmol) with methanol (5 mL) following the same procedure as that described above for the preparation of **8a**. Yield: (92%). <sup>1</sup>H NMR (C<sub>6</sub>D<sub>6</sub>): δ 12.78 (s, 1H, NH), 8.49 (dd, *J* = 8.5, 1.5 Hz, 1H, Ph), 7.86–7.79 (m, 2H), 7.61 (ddd, *J* = 5.0, 2.0, 1.0 Hz, 1H, Ph), 7.47 (dd, *J* = 8.0, 1.5 Hz, 1H, Ph), 7.38 (ddd, *J* = 8.5, 7.0, 1.5 Hz, 1H, Ph), 7.21 (d, *J* = 8.0 Hz, 1H, Ph), 7.20–7.15 (m, 5H, Ph), 7.14–7.12 (m, 2H), 7.11–7.07 (m, 1H), 6.95 (td, *J* = 8.0, 2.0 Hz, 1H), 6.81 (ddd, *J* = 8.0, 7.0, 1.5 Hz, 1H), 6.43 (ddd, *J* = 7.5, 5.0, 1.0 Hz, 1H) ppm. <sup>13</sup>C{<sup>1</sup>H} NMR (C<sub>6</sub>D<sub>6</sub>): δ 158.8 (NHN-C<sub>aryl</sub>), 146.8 (Ph), 145.6 (Ph), 145.5 (Ph), 139.5, 136.6, 136.1, 131.0, 129.9, 129.5, 128.6, 128.5, 128.4, 128.2, 127.1, 121.3 (Ph), 120.1, 120.0, 118.9, 114.8 ppm. HRMS (ESI): calcd for C<sub>24</sub>H<sub>19</sub>N<sub>3</sub> [M+H]<sup>+</sup>: 350.1652, found 350.1655.

### Synthesis of different imines

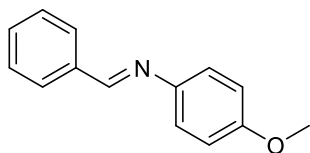

1. Methoxy-*N*-(phenylmethylene)benzenamine<sup>6</sup>: Yellow solid. <sup>1</sup>H NMR (C<sub>6</sub>D<sub>6</sub>): δ 8.22 (s, 1H), 7.88–7.82 (m, 2H), 7.21–7.16 (m, 2H), 7.15–7.09 (m, 3H), 6.80–6.74 (m, 2H), 3.29 (s, 3H) ppm. <sup>13</sup>C{<sup>1</sup>H} NMR (C<sub>6</sub>D<sub>6</sub>): δ 158.9, 157.9, 145.5, 137.4, 131.0, 129.0, 129.1, 122.8, 114.8, 55.0 ppm.

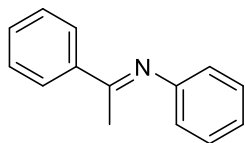

*N*-(1-phenylethylidene)benzenamine<sup>6</sup>: Yellow solid. <sup>1</sup>H NMR (C<sub>6</sub>D<sub>6</sub>): δ 7.95 (ddd, *J* = 4.0, 3.0, 1.5 Hz, 2H), 7.19–7.17 (m, 2H), 7.17–7.12 (m, 4H), 6.95–6.91 (m, 1H), 6.77–6.73 (m, 1H), 1.81 (s, 3H) ppm. <sup>13</sup>C{<sup>1</sup>H} NMR (C<sub>6</sub>D<sub>6</sub>): δ 164.5, 152.6, 140.0, 131.0, 129.3, 128.4, 127.7, 123.5, 120.0, 16.8 ppm.

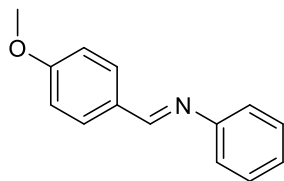

1. (*p*-Anisal)aniline<sup>7</sup>: Yellow solid. <sup>1</sup>H NMR (C<sub>6</sub>D<sub>6</sub>): δ 8.15 (s, 1H), 7.76 (d, *J* = 8.0 Hz, 2H), 7.16 (t, *J* = 4.5 Hz, 3H), 7.05–6.99 (m, 1H), 6.93 (d, *J* = 8.0 Hz, 2H), 2.01 (s, 3H) ppm. <sup>13</sup>C{<sup>1</sup>H} NMR (C<sub>6</sub>D<sub>6</sub>): δ 162.6, 159.4, 153.3, 130.9, 130.1, 129.4, 125.8, 121.5, 114.5, 54.9 ppm.

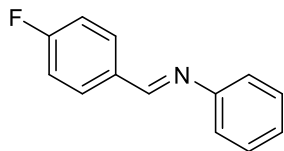

*N*-(4-fluorobenzylidene)Aniline<sup>7</sup>: White solid. <sup>1</sup>H NMR (C<sub>6</sub>D<sub>6</sub>): δ 7.95 (s, 1H), 7.58–7.52 (m, 2H), 7.18–7.15 (m, 2H), 7.14–7.10 (m, 2H), 7.04–7.00 (m, 1H), 6.74–6.68 (m, 2H) ppm. <sup>13</sup>C{<sup>1</sup>H} NMR (C<sub>6</sub>D<sub>6</sub>): δ 164.9 (d, *J*<sub>C-F</sub> = 252.0 Hz), 163.9, 158.5, 152.6, 131.1 (d, *J*<sub>C-F</sub> = 8.8 Hz), 129.5, 126.2, 121.3, 116.0, 115.9 (d, *J*<sub>C-F</sub> = 22.7 Hz) ppm.

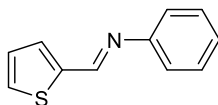

*N*-(2-thienylmethylene)benzenamine<sup>7</sup>: Yellow oil <sup>1</sup>H NMR (C<sub>6</sub>D<sub>6</sub>): δ 8.16 (s, 1H), 7.18 (s, 1H), 7.16–7.13 (m, 3H), 7.03 (dd, *J* = 5.5, 2.5 Hz, 1H), 6.99 (dd, *J* = 3.5, 1.0 Hz, 1H), 6.86 (d, *J* = 5.0 Hz, 1H), 6.67 (dd, *J* = 5.0, 3.5 Hz, 1H) ppm. <sup>13</sup>C{<sup>1</sup>H} NMR (C<sub>6</sub>D<sub>6</sub>): δ 152.8, 152.1, 143.8, 132.1, 130.3, 129.4, 127.6, 126.2, 121.5 ppm.

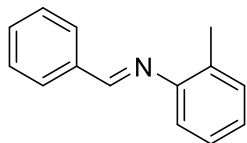

1. Methyl-*N*-(phenylmethylene)benzenamine<sup>8</sup>: Yellow oil <sup>1</sup>H NMR (C<sub>6</sub>D<sub>6</sub>): δ 8.05 (s, 1H), 7.81 (dd, *J* = 7.5, 2.0 Hz, 2H), 7.14–7.11 (m, 3H), 7.10–7.05 (m, 2H), 6.75 (d, *J* = 7.5 Hz, 1H), 2.42 (s, 3H) ppm. <sup>13</sup>C{<sup>1</sup>H} NMR (C<sub>6</sub>D<sub>6</sub>): δ 159.3, 151.7, 137.2, 132.4, 131.2, 130.6, 129.1, 128.9, 128.3, 128.1, 127.9, 127.1, 126.1, 118.0, 18.2 ppm.

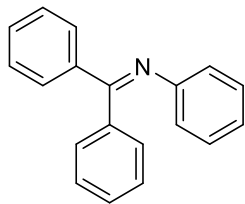

*N*-(diphenylmethylene)benzenamine<sup>9</sup>: Yellow solid. <sup>1</sup>H NMR (C<sub>6</sub>D<sub>6</sub>): δ 7.95–7.91 (m, 2H), 7.14–7.06 (m, 3H), 7.00–6.95 (m, 2H), 6.95–6.89 (m, 2H), 6.87–6.82 (m, 3H), 6.82–6.76 (m, 2H), 6.76–6.71 (m, 1H) ppm. <sup>13</sup>C{<sup>1</sup>H} NMR (C<sub>6</sub>D<sub>6</sub>): δ 140.2, 136.8, 130.9, 129.8, 129.7, 128.8, 128.2, 123.4, 121.3 ppm.

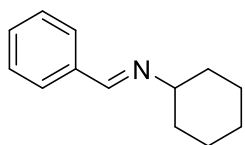

*N*-(phenylmethylene)cyclohexanamine<sup>10</sup>: Yellow oil. <sup>1</sup>H NMR (C<sub>6</sub>D<sub>6</sub>): δ 8.01 (s, 1H), 7.77 (s, 1H), 7.75 (s, 1H), 7.10 (d, *J* = 7.4 Hz, 2H), 7.06 (dd, *J* = 8.5, 5.5 Hz, 1H), 3.01 (dt, *J* = 14.0, 7.0 Hz, 1H), 1.71 (dd, *J* = 12.5, 6.5 Hz, 5H), 1.56–1.48 (m, 1H), 1.29–1.15 (m, 3H) ppm. <sup>13</sup>C{<sup>1</sup>H} NMR (C<sub>6</sub>D<sub>6</sub>): δ 158.1, 137.5, 130.4, 128.6, 70.2, 34.9, 26.2, 25.0 ppm.

#### 4. Copies of NMR spectra of the rare-earth metal complexes

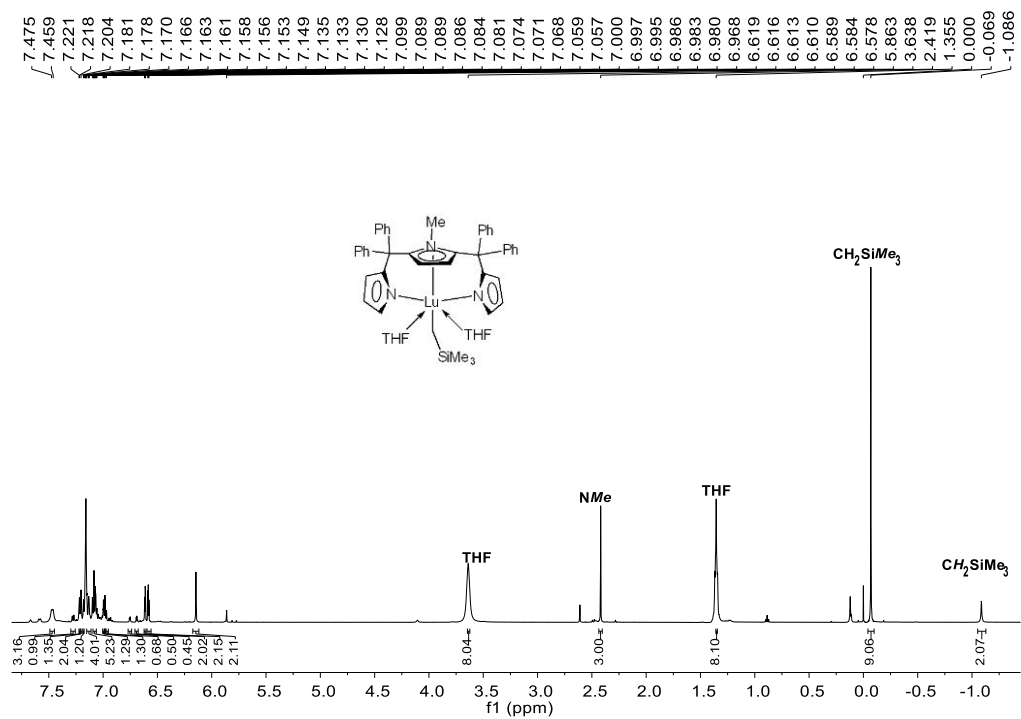

Figure S19. <sup>1</sup>H NMR (500 MHz, C<sub>6</sub>D<sub>6</sub>, 25 °C) spectrum of complex **1a'**.

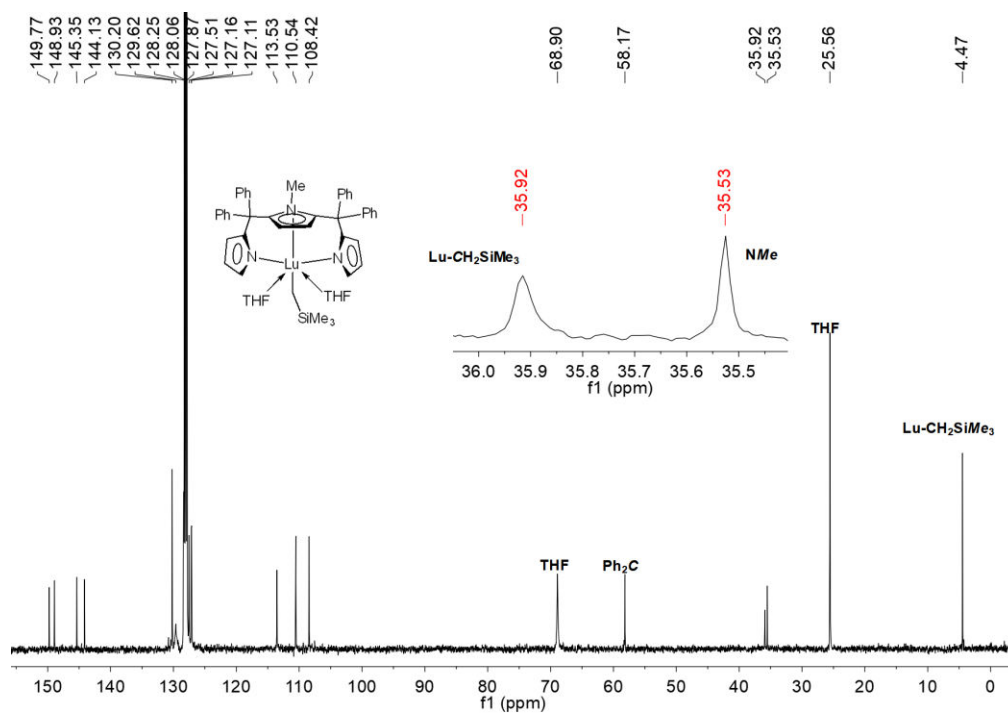

Figure S20. <sup>13</sup>C{<sup>1</sup>H} NMR (126 MHz, C<sub>6</sub>D<sub>6</sub>, 25 °C) spectrum of complex **1a'**.

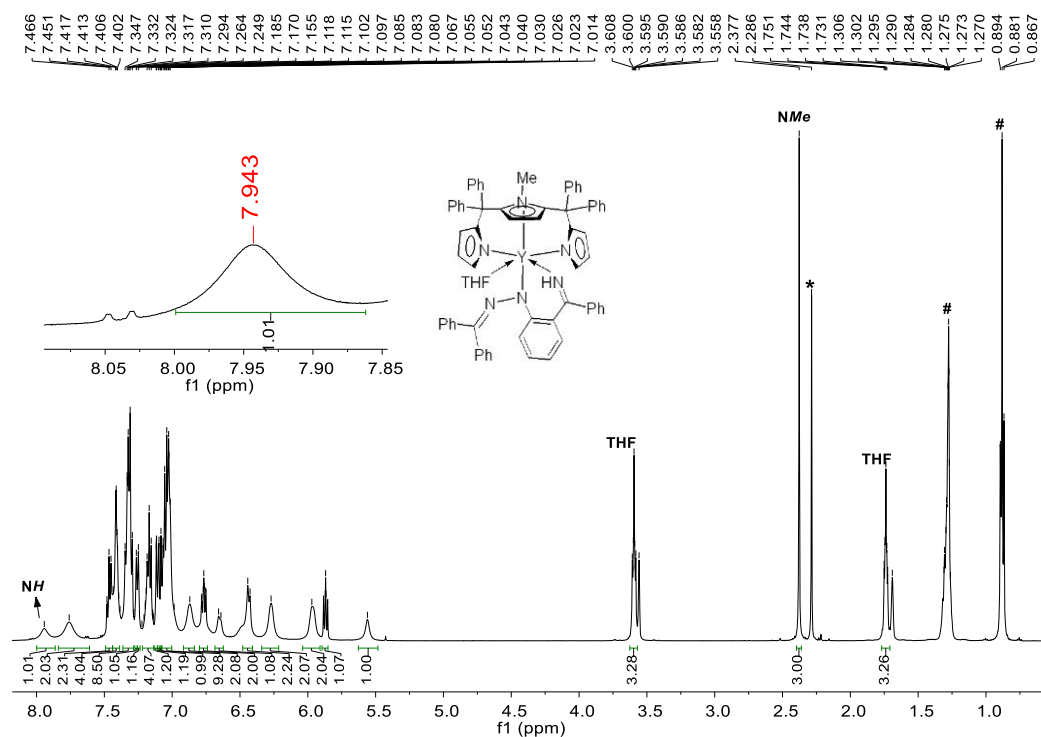

**Figure S21.**  $^1\text{H}$  NMR (500 MHz,  $\text{THF-}d_8$ ,  $25^\circ\text{C}$ ) spectrum of complex **2a**. The peaks labelled with \* and # represent residual toluene and *n*-hexane, respectively.

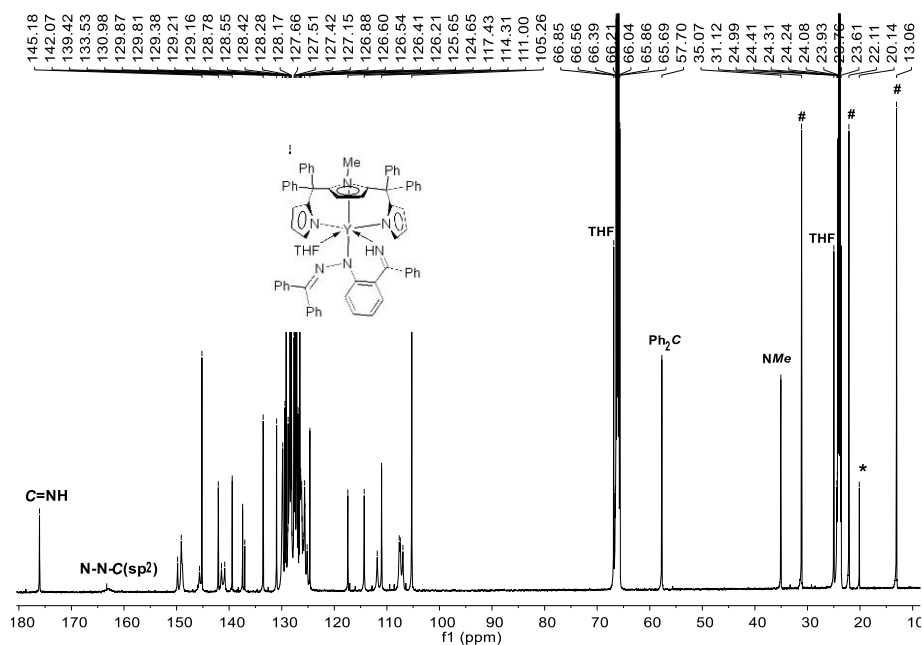

**Figure S22.**  $^{13}\text{C}\{^1\text{H}\}$  NMR (126 MHz,  $\text{THF-}d_8$ ,  $25^\circ\text{C}$ ) spectrum of complex **2a**. The peaks labelled with \* and # represent residual toluene and *n*-hexane, respectively.



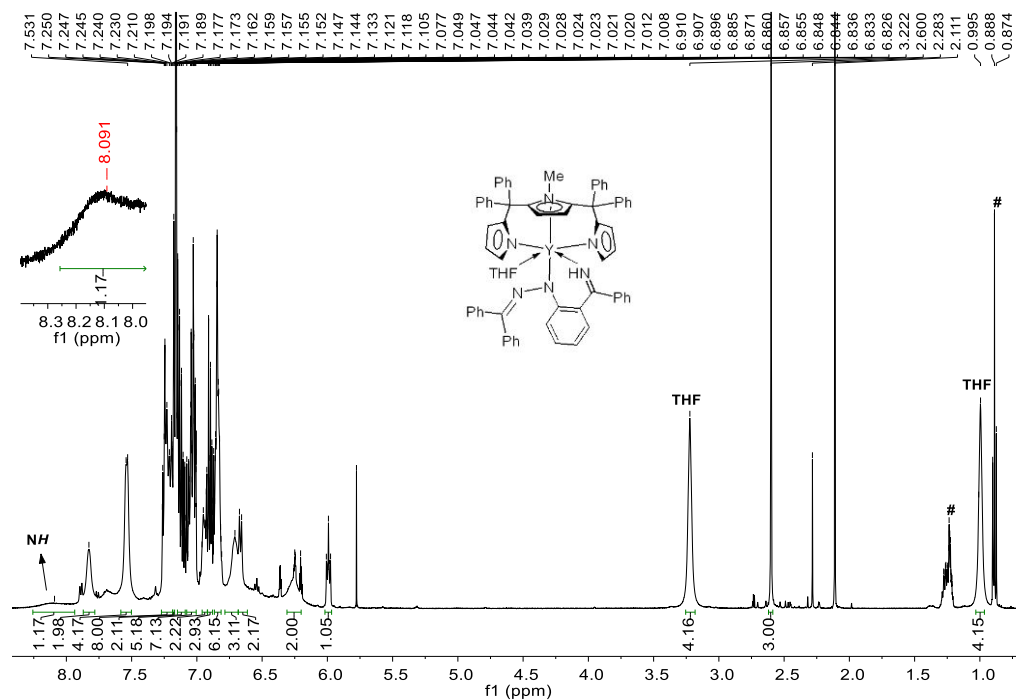

**Figure S23.**  $^1\text{H}$  NMR (500 MHz,  $\text{C}_6\text{D}_6$ , 25  $^\circ\text{C}$ ) spectrum of complex **2a**. The peaks labelled with \* and # represent residual toluene and *n*-hexane, respectively.

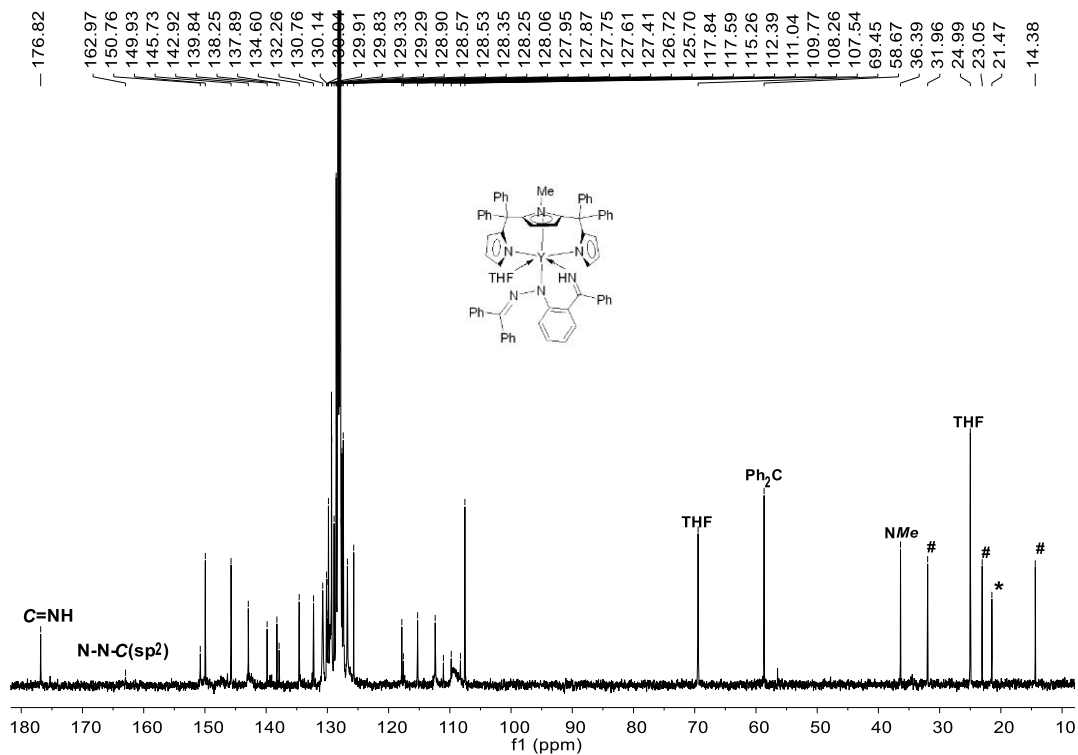

**Figure S24.**  $^{13}\text{C}\{^1\text{H}\}$  NMR (126 MHz,  $\text{C}_6\text{D}_6$ , 25 °C) spectrum of complex **2a**. The peaks labelled with \* and # represent residual toluene and *n*-hexane, respectively.

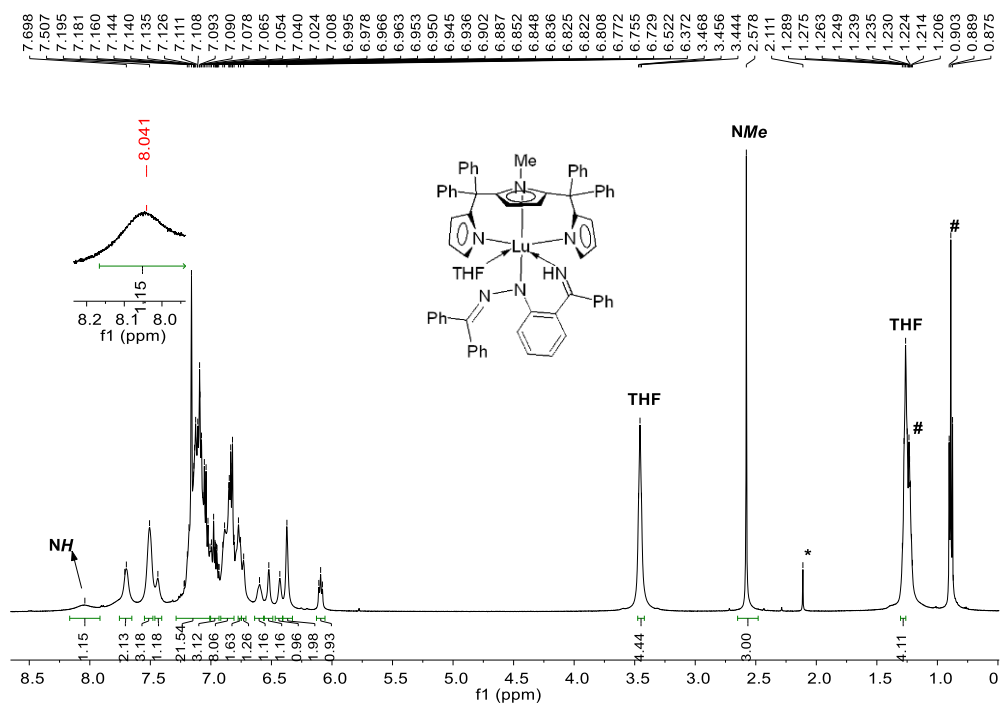

**Figure S25.**  $^1\text{H}$  NMR (500 MHz,  $\text{C}_6\text{D}_6$ , 25 °C) spectrum of complex **2a'**. The peaks labelled with \* and # represent residual toluene and *n*-hexane, respectively.

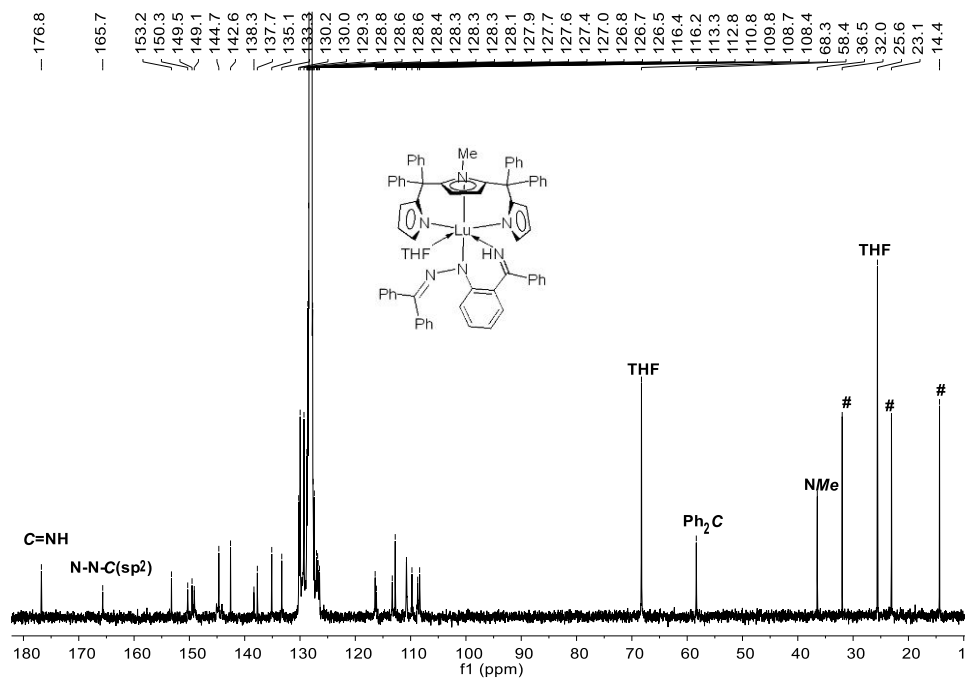

**Figure S26.**  $^{13}\text{C}\{^1\text{H}\}$  NMR (126 MHz,  $\text{C}_6\text{D}_6$ , 25 °C) spectrum of complex **2a'**. The peaks labelled with # represent residual *n*-hexane

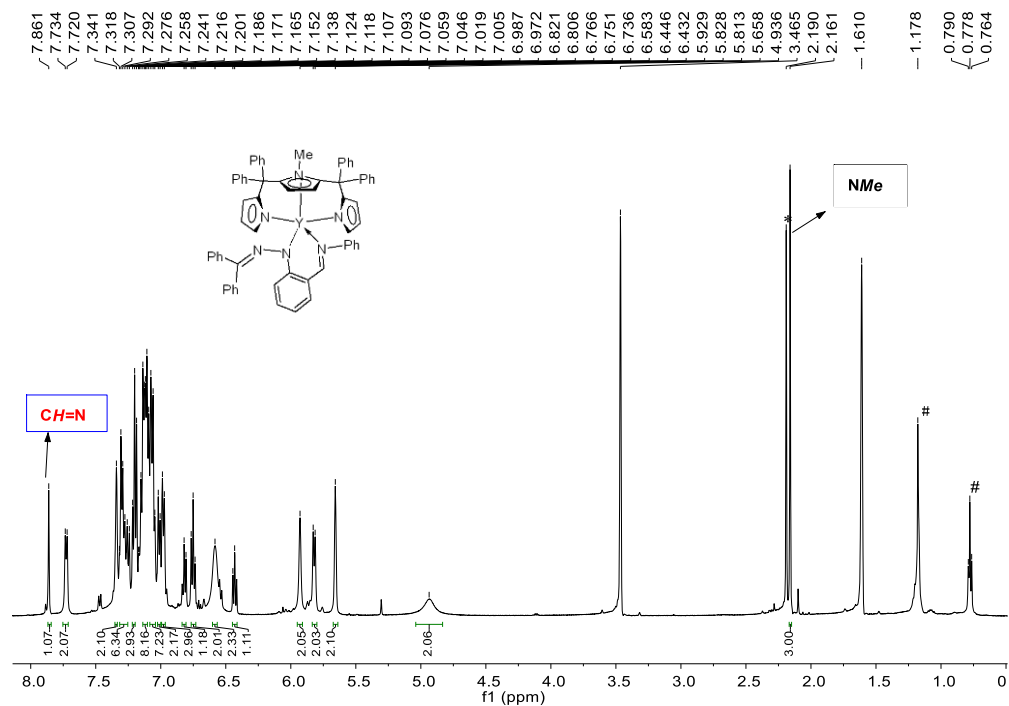

**Figure S27.**  $^1\text{H}$  NMR (500 MHz,  $\text{THF-}d_8$ , 25 °C) spectrum of complex **2b**. The peaks labelled with \* and # represent residual toluene and *n*-hexane, respectively.

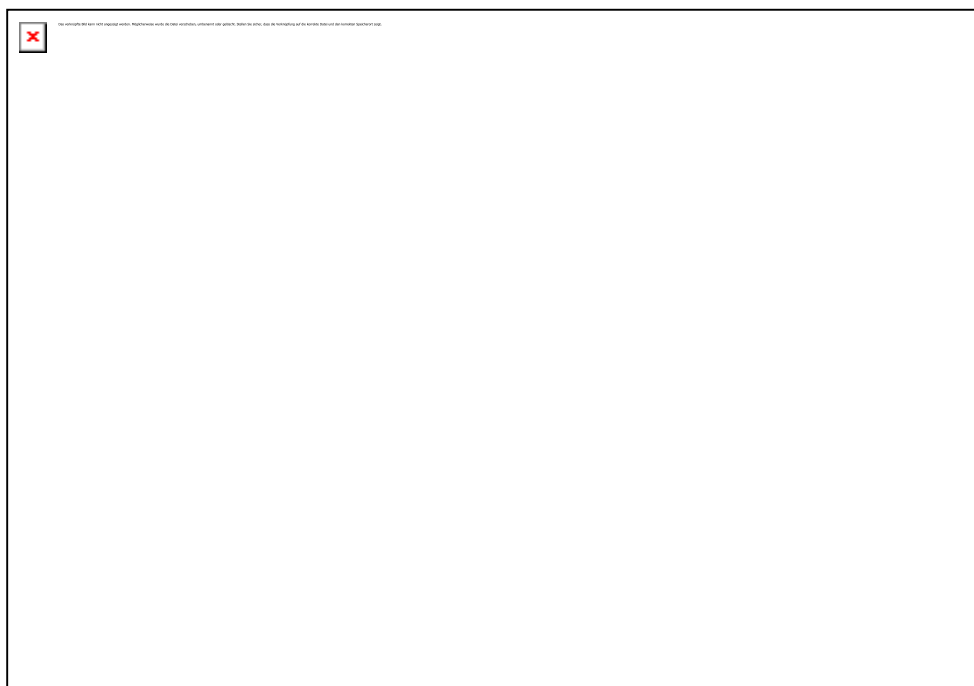

**Figure S28.**  $^{13}\text{C}\{^1\text{H}\}$  NMR (126 MHz, THF- $d_8$ , 25 °C) spectrum of complex **2b**. The peaks labelled with \* and # represent residual toluene and *n*-hexane, respectively.

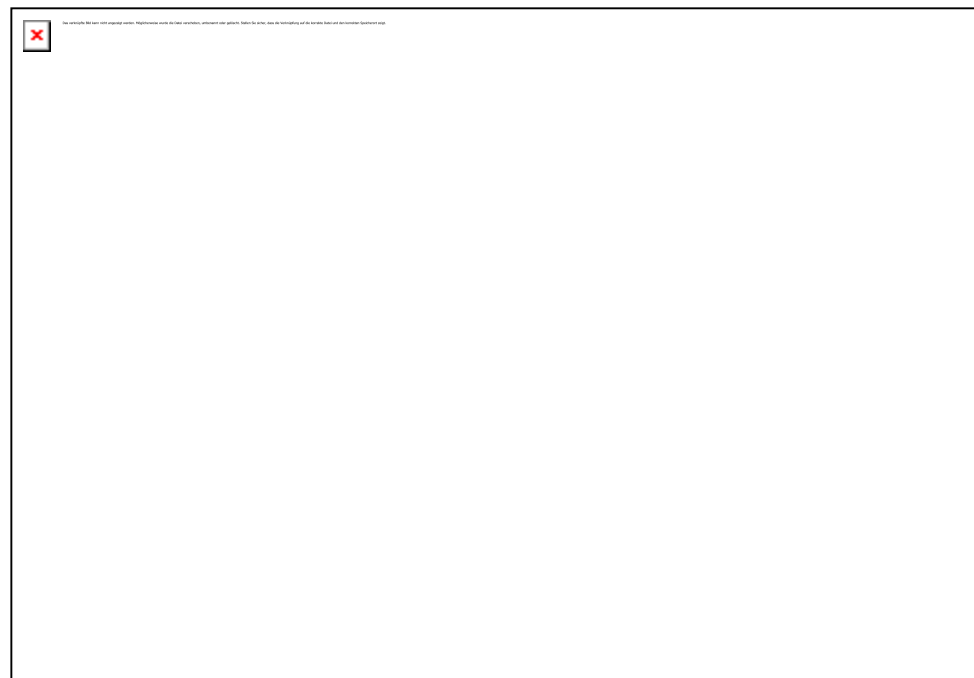

**Figure S29.**  $^1\text{H}$  NMR (500 MHz, THF- $d_8$ , 25 °C) spectrum of complex **2b'**. The peaks labelled with \* and # represent residual toluene and *n*-hexane, respectively.

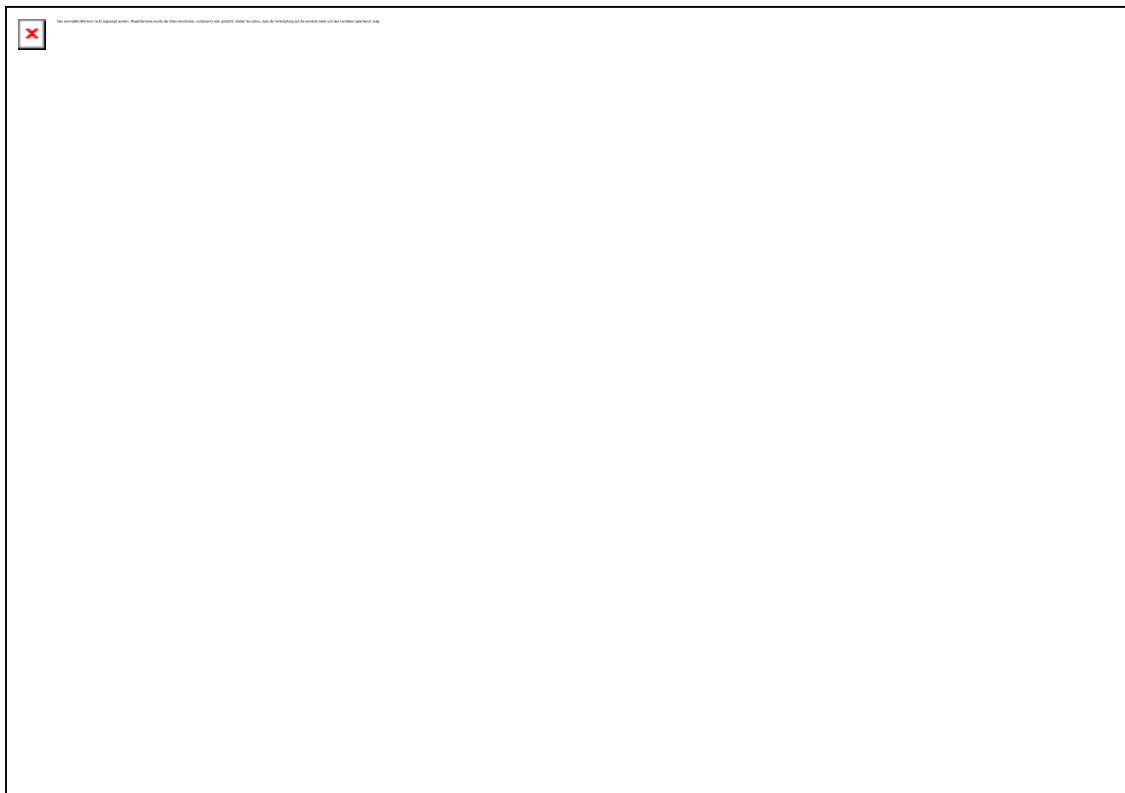

**Figure S30.**  $^{13}\text{C}\{^1\text{H}\}$  NMR (126 MHz, THF- $d_8$ , 25 °C) spectrum of complex **2b'**. The peaks labelled with \*, # and • represent residual toluene, *n*-hexane and impurities respectively.

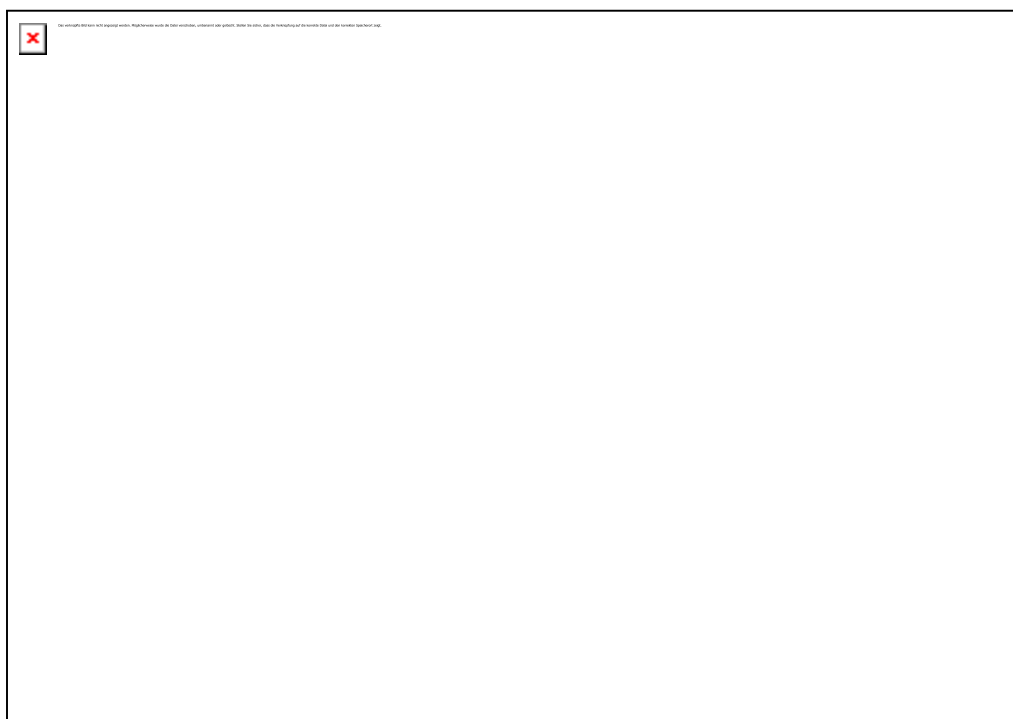

**Figure S31.**  $^1\text{H}$  NMR (500 MHz, THF- $d_8$ , 25 °C) spectrum of complex **2c**. The peaks labelled with \* and # represent residual toluene and *n*-hexane, respectively.

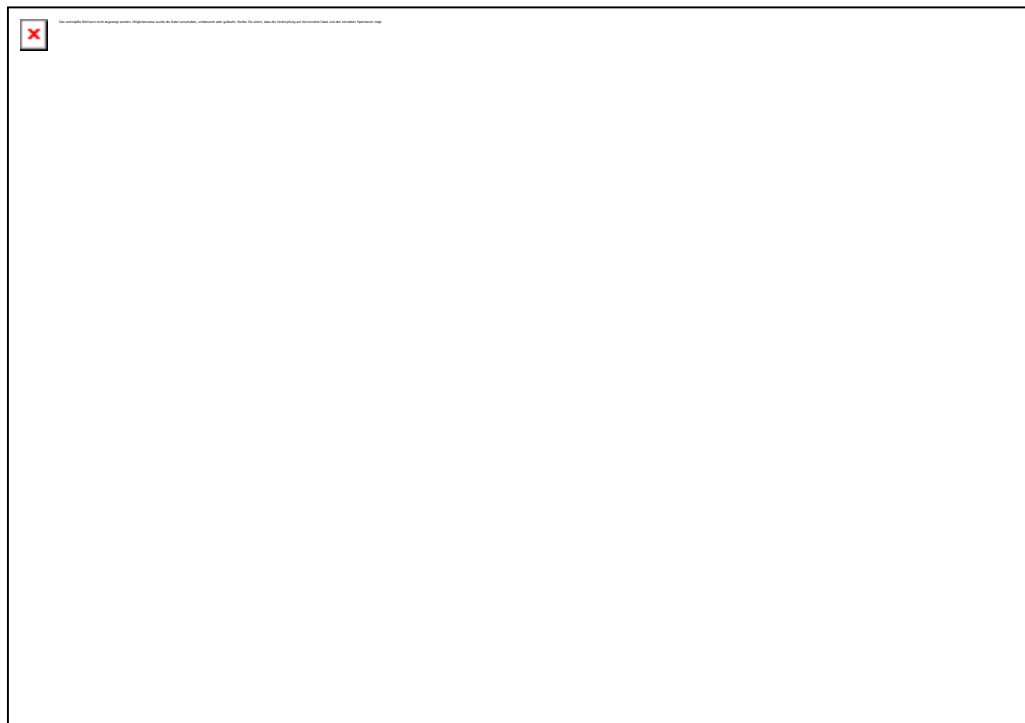

**Figure S32.**  $^{13}\text{C}\{^1\text{H}\}$  NMR (126 MHz, THF- $d_8$ , 25 °C) spectrum of complex **2c**. The peaks labelled with \* and # represent residual toluene and *n*-hexane, respectively.

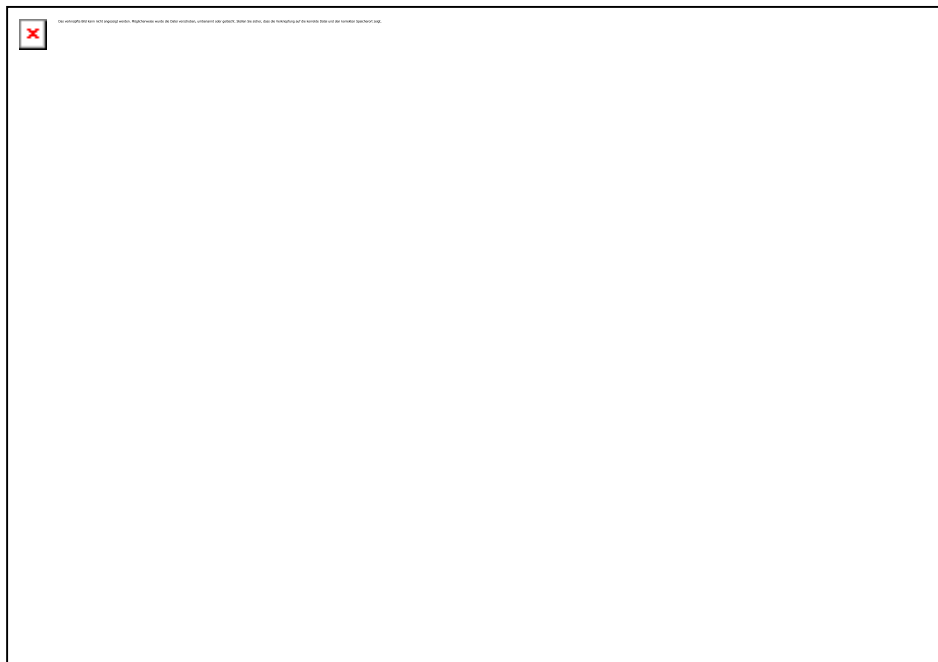

**Figure S33.**  $^1\text{H}$  NMR (500 MHz, THF- $d_8$ , 25 °C) spectrum of complex **2c'**. The peaks labelled with \* and # represent residual toluene and *n*-hexane, respectively.

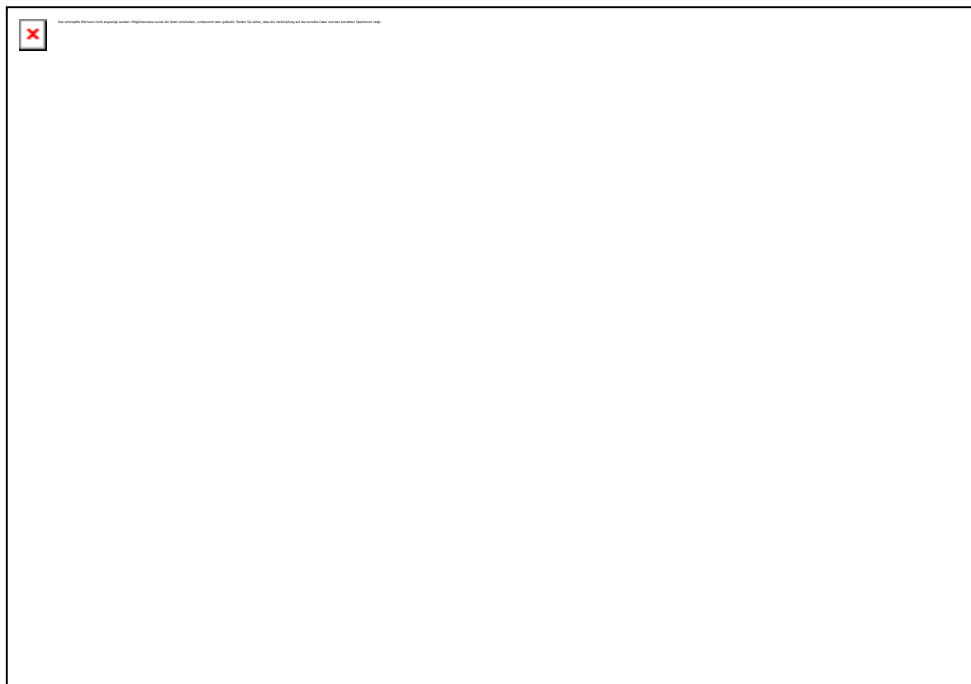

**Figure S34.**  $^{13}\text{C}\{^1\text{H}\}$  NMR (126 MHz, THF- $d_8$ , 25 °C) spectrum of complex **2c'**. The peaks labelled with \* and # represent residual toluene and *n*-hexane, respectively.

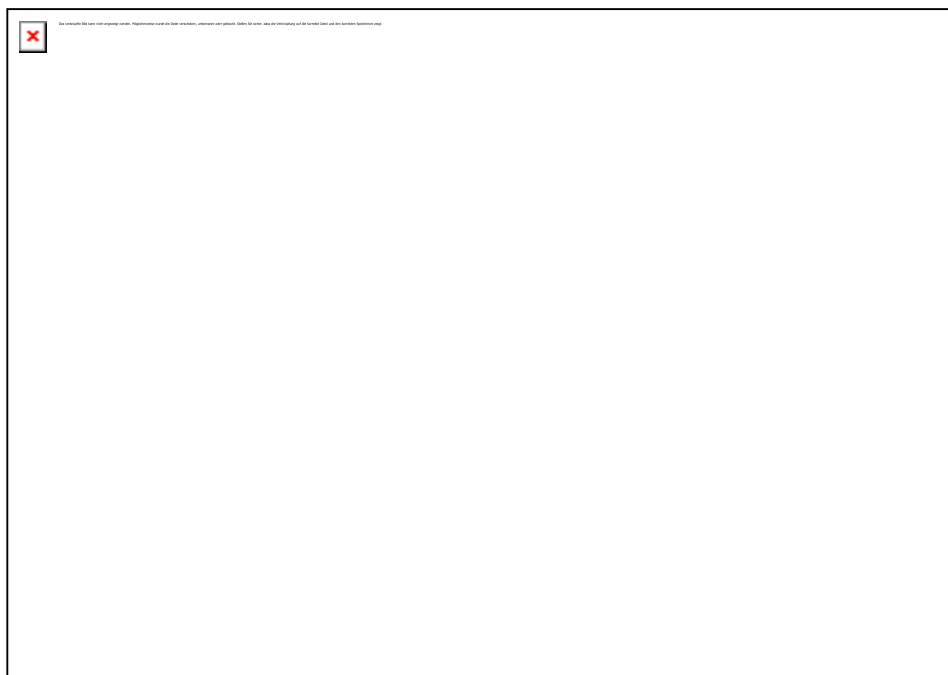

**Figure S35.**  $^1\text{H}$  NMR (500 MHz, THF- $d_8$ , 25 °C) spectrum of complex **2d**. The peaks labelled with \* and # represent residual toluene and *n*-hexane, respectively.

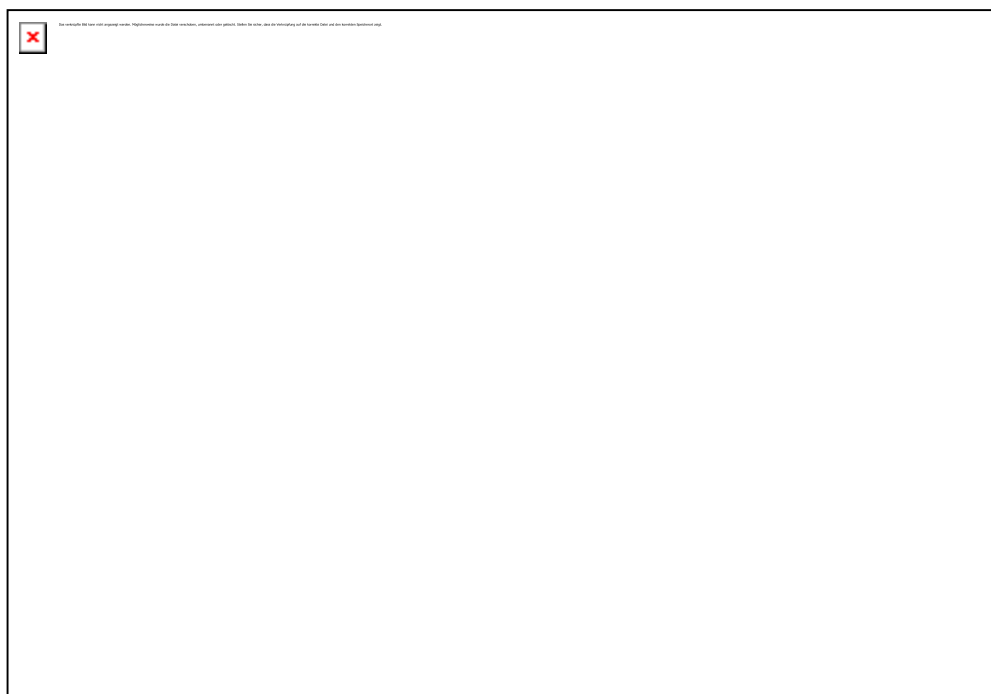



**Figure S36.**  $^{13}\text{C}\{^1\text{H}\}$  NMR (126 MHz, THF- $d_8$ , 25 °C) spectrum of complex **2d**. The peaks labelled with \* and # represent residual toluene and *n*-hexane, respectively.

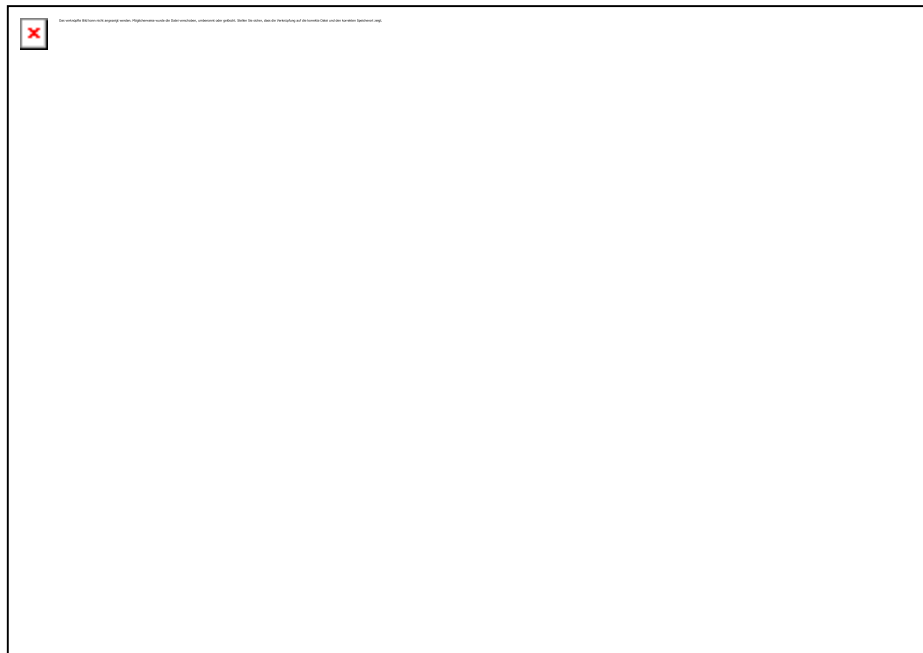

**Figure S37.**  $^1\text{H}$  NMR (500 MHz, THF- $d_8$ , -20 °C) spectrum of complex **2d'**. The peaks labelled with \* and # represent residual toluene and *n*-hexane, respectively.

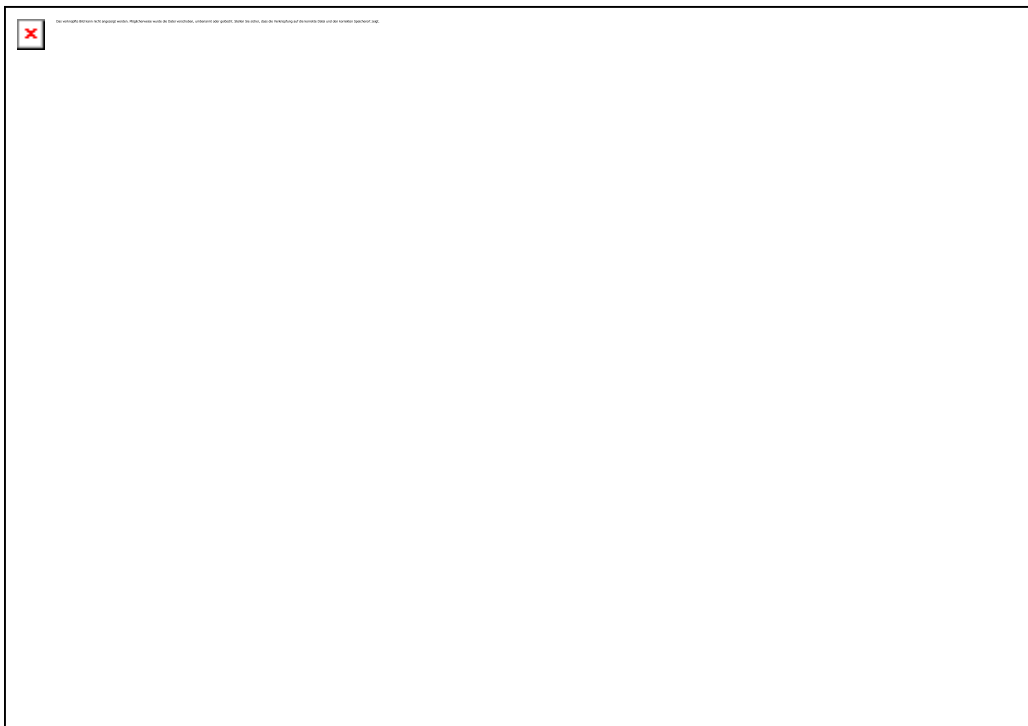

**Figure S38.**  $^{13}\text{C}\{^1\text{H}\}$  NMR (126 MHz, THF- $d_8$ , 25 °C) spectrum of complex **2d'**. The peaks labelled with \* and # represent residual toluene and *n*-hexane, respectively.

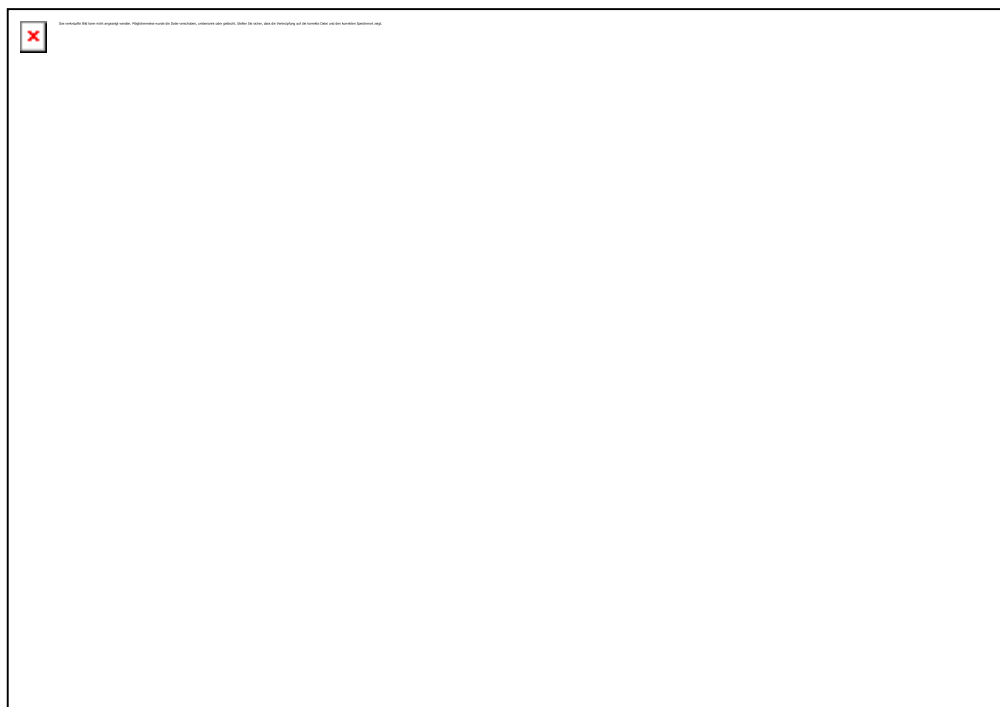

**Figure S39.**  $^1\text{H}$  NMR (500 MHz, THF- $d_8$ , 25 °C) spectrum of complex **2e**. The peaks labelled with \* and # represent residual toluene and *n*-hexane, respectively.

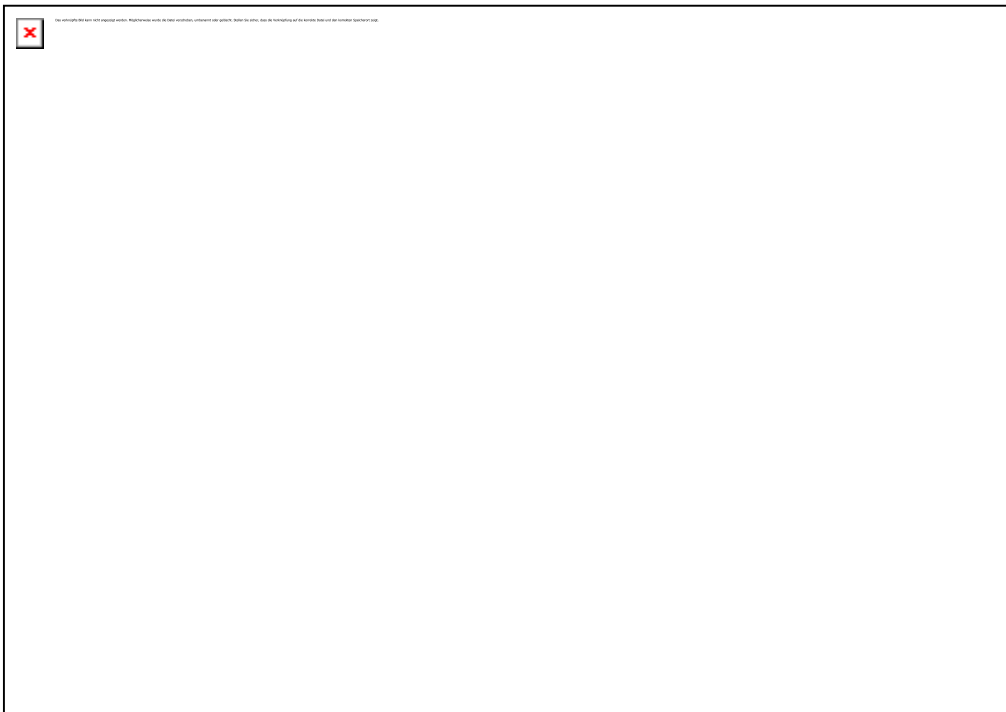

**Figure S40.**  $^{13}\text{C}\{^1\text{H}\}$  NMR (500 MHz,  $\text{THF-}d_8$ , 25 °C) spectrum of complex **2e**. The peaks labelled with \* and # represent residual toluene and *n*-hexane, respectively.

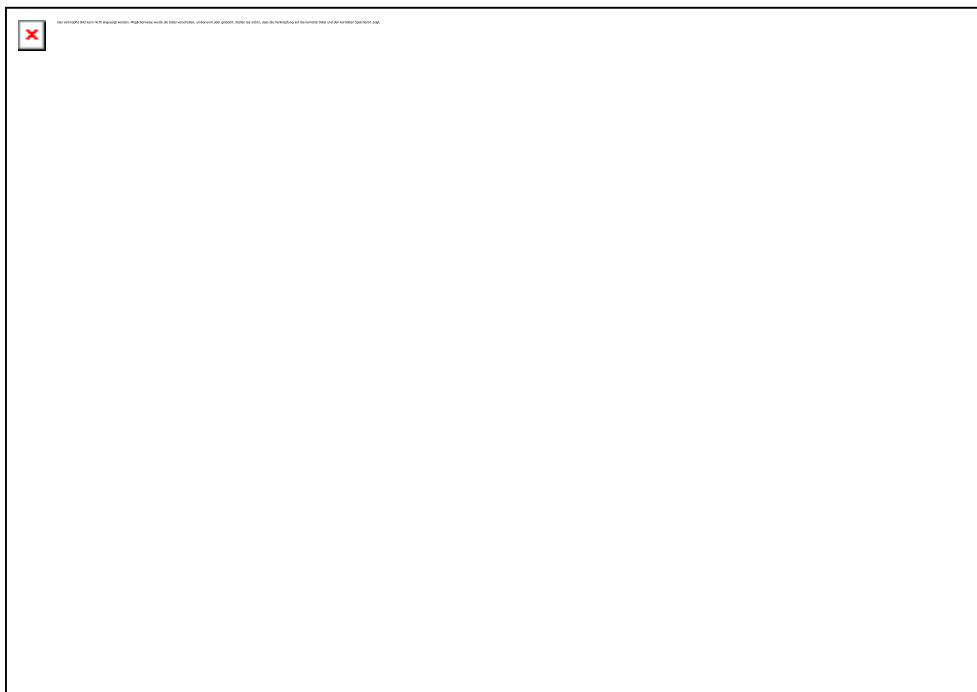

**Figure S41.**  $^{19}\text{F}$  NMR (471 MHz,  $\text{THF-}d_8$ , 25 °C):  $\delta$  -103.97 (s).

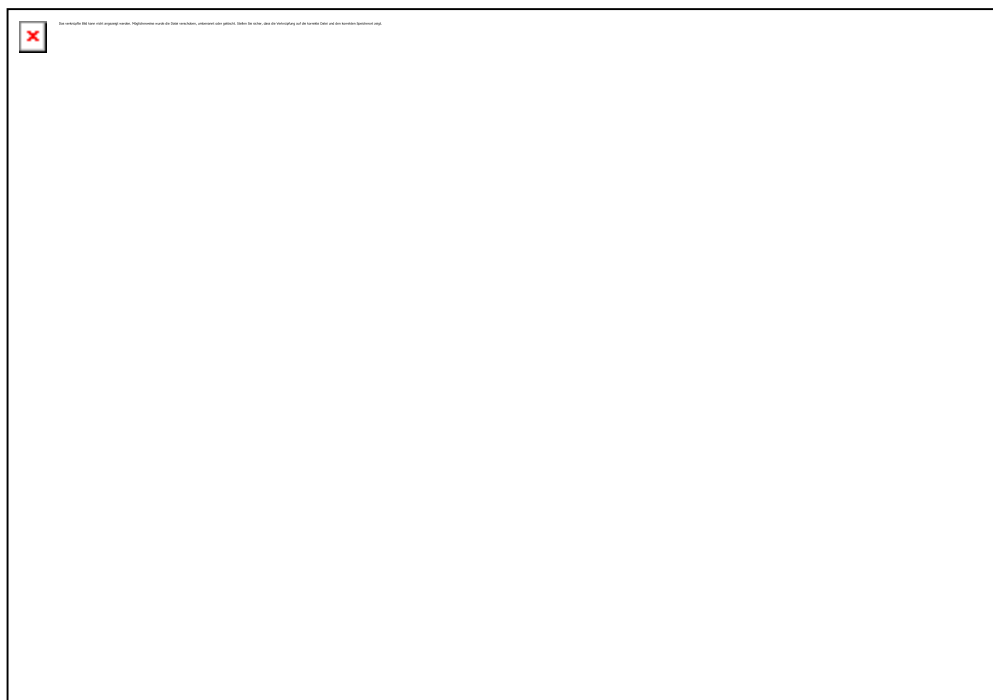

**Figure S42.**  $^1\text{H}$  NMR (500 MHz,  $\text{THF-}d_8$ , 25 °C) spectrum of complex **2f**. The peaks labelled with \* and # represent residual toluene and *n*-hexane, respectively.

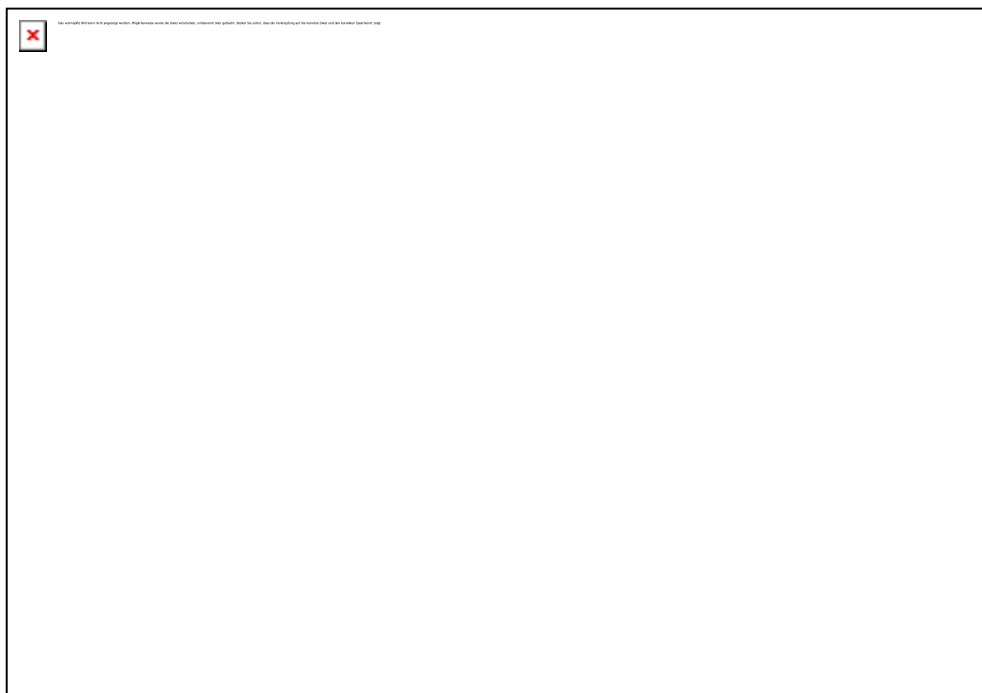

**Figure S43.**  $^{13}\text{C}\{^1\text{H}\}$  NMR (126 MHz,  $\text{THF-}d_8$ , 25 °C) spectrum of complex **2f**. The peaks labelled with \* and # represent residual toluene and *n*-hexane, respectively.

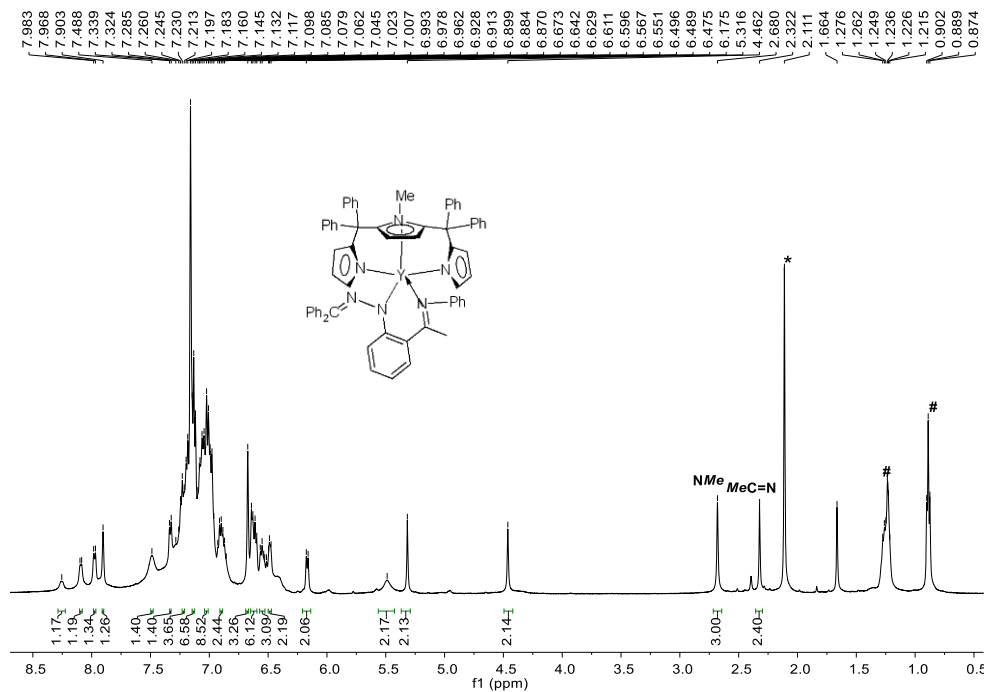

**Figure S44.**  $^1\text{H}$  NMR (500 MHz,  $\text{C}_6\text{D}_6$ , 25 °C) spectrum of complex **2g**. The peaks labelled with \* and # represent residual toluene and *n*-hexane, respectively

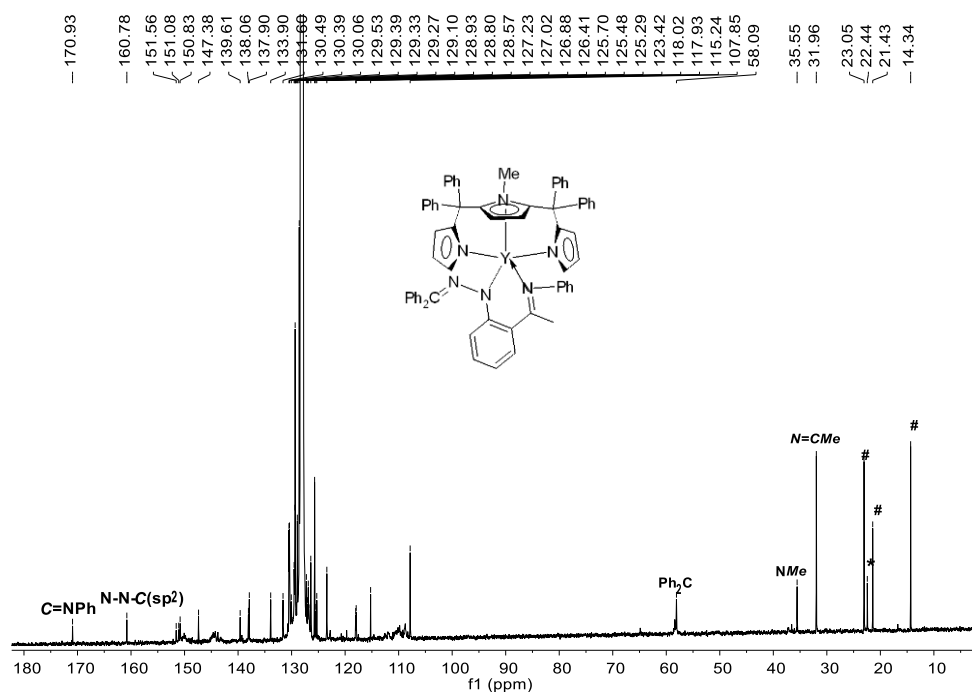

**Figure S45.**  $^{13}\text{C}\{^1\text{H}\}$  NMR (126 MHz, THF- $d_8$ , 25 °C) spectrum of complex **2g**. The peaks labelled with \* and # represent residual toluene and *n*-hexane, respectively.

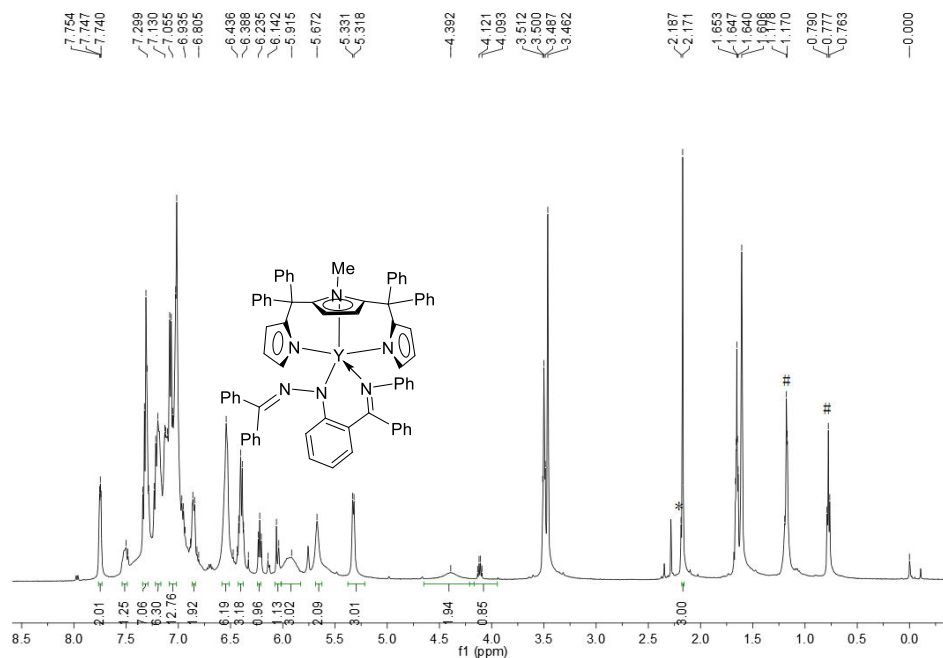

**Figure S46.**  $^1\text{H}$  NMR (500 MHz, THF- $d_8$ , 25 °C) spectrum of complex **2h**. The peaks labelled with \* and # represent residual toluene and *n*-hexane, respectively.

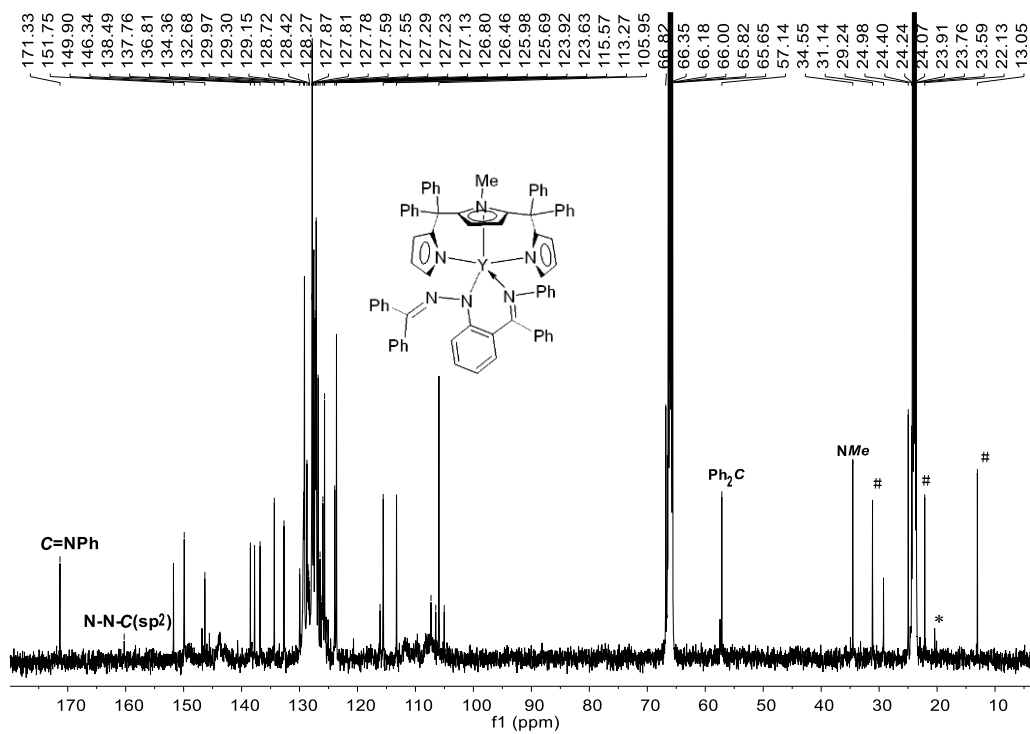

**Figure S47.**  $^{13}\text{C}\{^1\text{H}\}$  NMR (126 MHz, THF- $d_8$ , 25 °C) spectrum of complex **2h**. The peaks labelled with \* and # represent residual toluene and *n*-hexane, respectively.

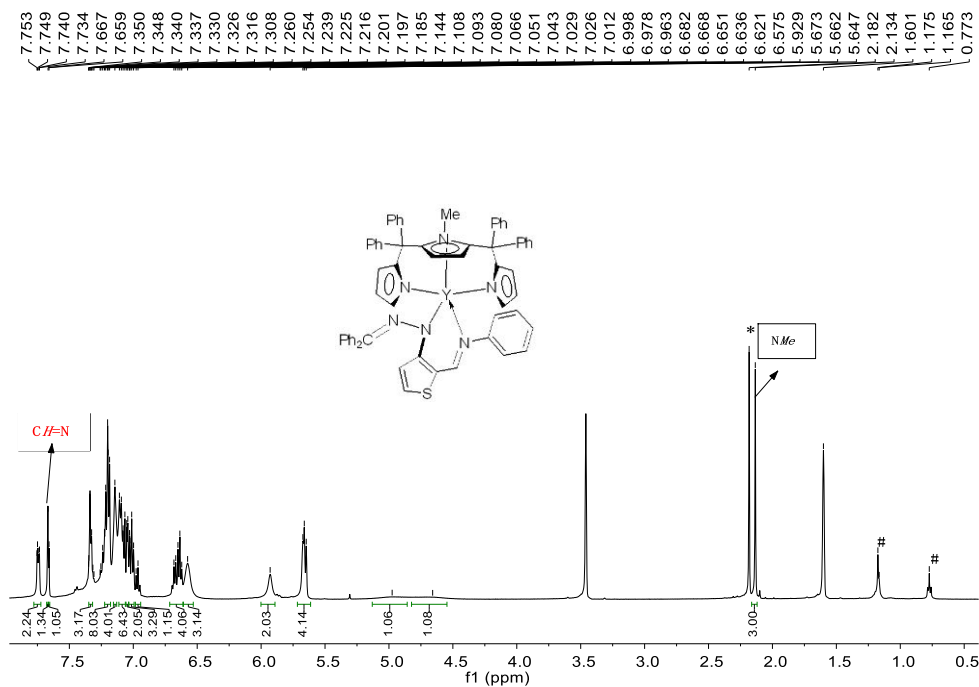

**Figure S48.**  $^1\text{H}$  NMR (500 MHz,  $\text{THF-}d_8$ , 25 °C) spectrum of complex **2i**. The peaks labelled with \* and # represent residual toluene and *n*-hexane, respectively

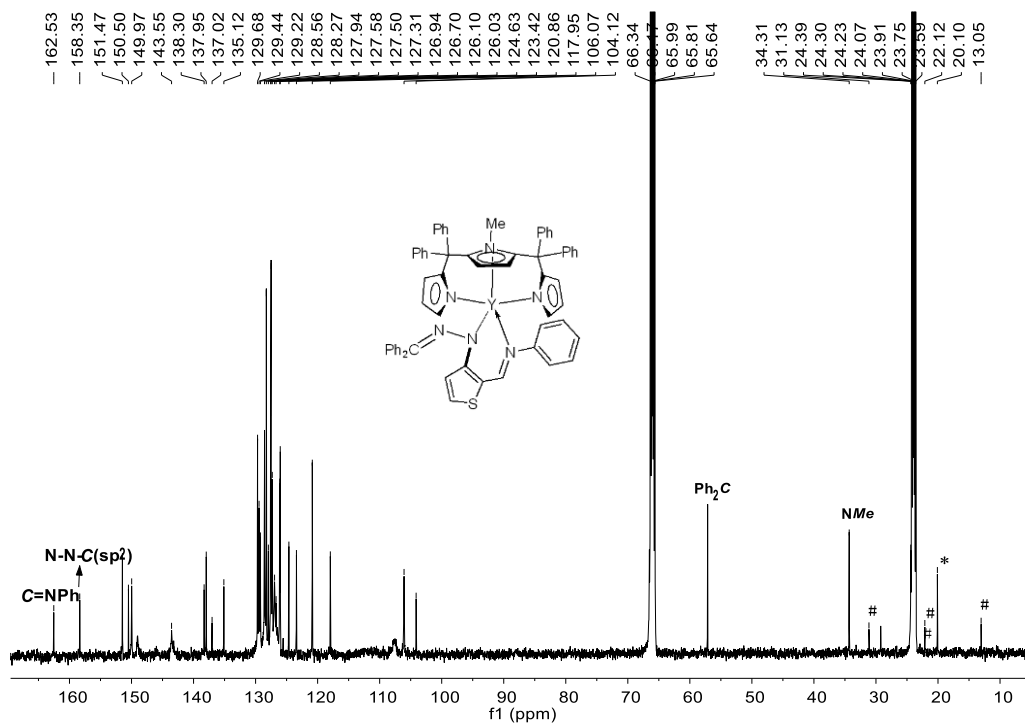

**Figure S49.**  $^{13}\text{C}\{^1\text{H}\}$  NMR (126 MHz,  $\text{THF-}d_8$ , 25 °C) spectrum of complex **2i**. The peaks labelled with \* and # represent residual toluene and *n*-hexane, respectively.

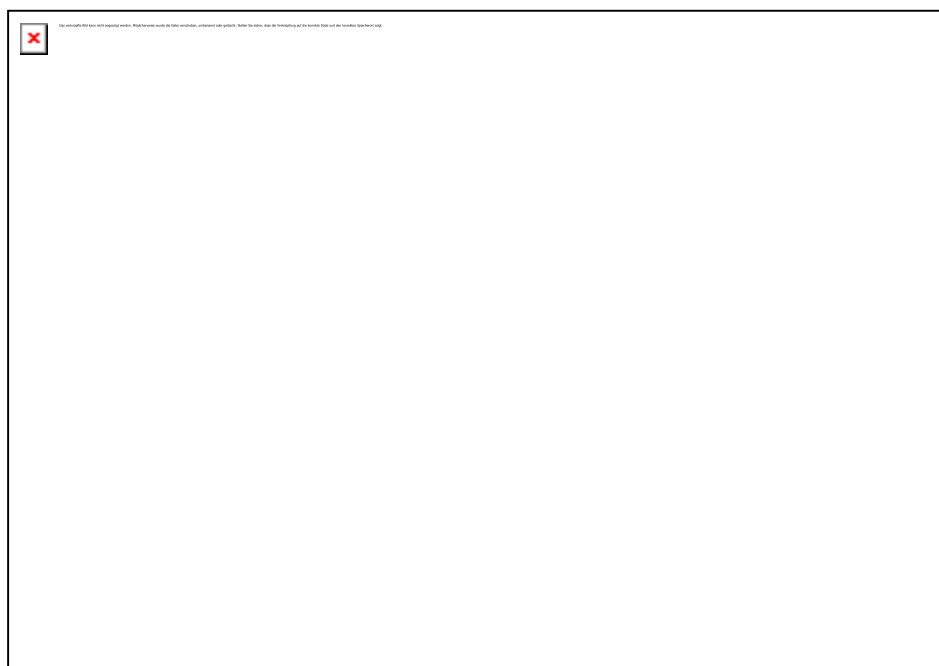



**Figure S50.**  $^1\text{H}$  NMR (500 MHz,  $\text{THF-}d_8$ , 25 °C) spectrum of complex **2j**. The peaks labelled with \* and # represent residual toluene and *n*-hexane, respectively

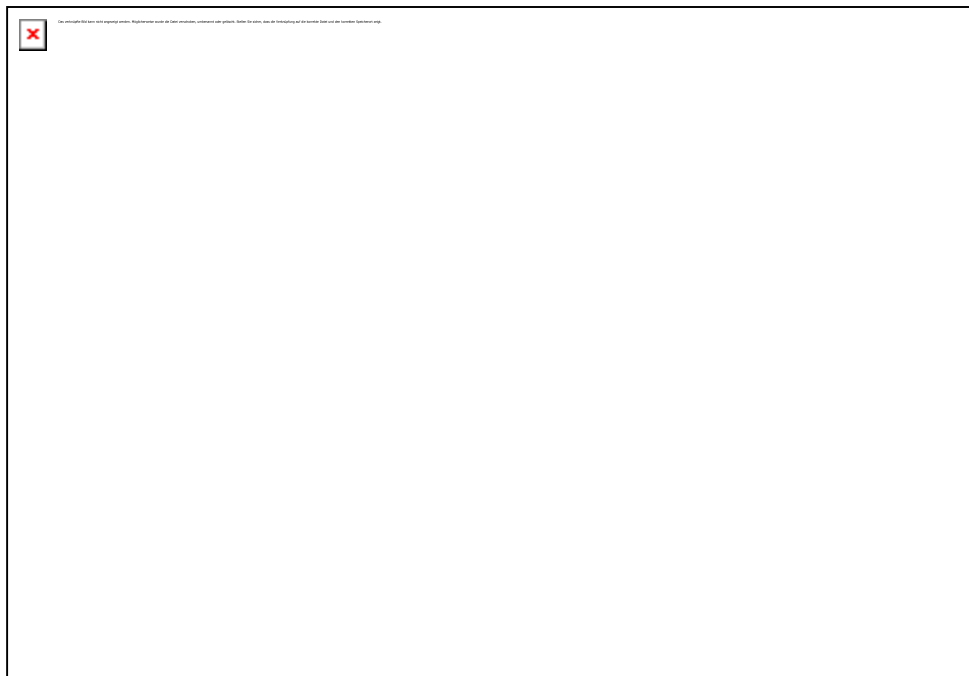

**Figure S51.**  $^{13}\text{C}\{^1\text{H}\}$  NMR (126 MHz,  $\text{THF-}d_8$ , 25 °C) spectrum of complex **2j**. The peaks labelled with \* and # represent residual toluene and *n*-hexane, respectively.

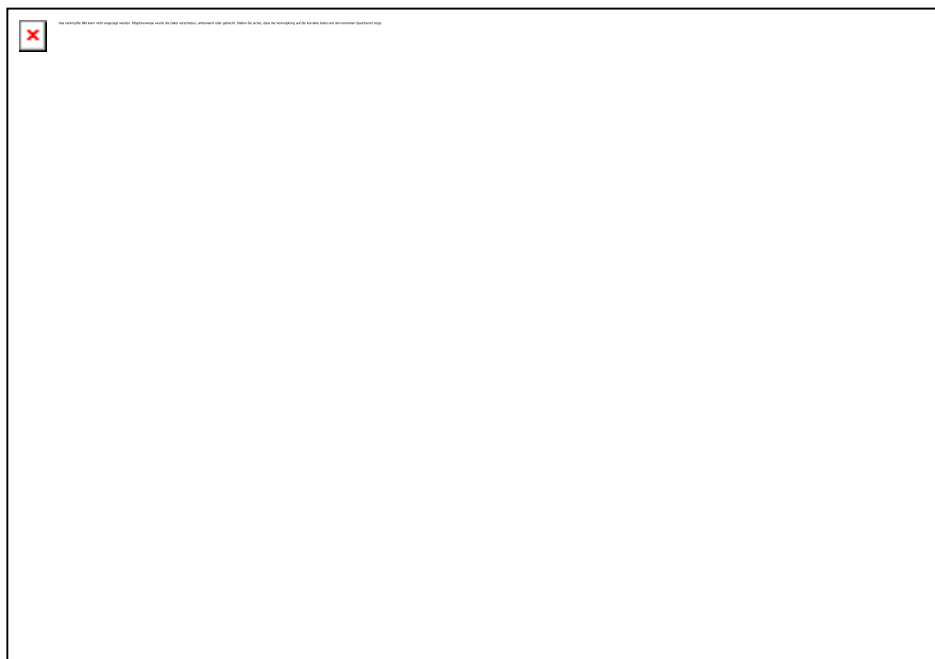

**Figure S52.**  $^1\text{H}$  NMR (500 MHz,  $\text{C}_6\text{D}_6$ , 25 °C) spectrum of complex **3a'**. The peaks labelled with \* and # represent residual toluene and *n*-hexane, respectively

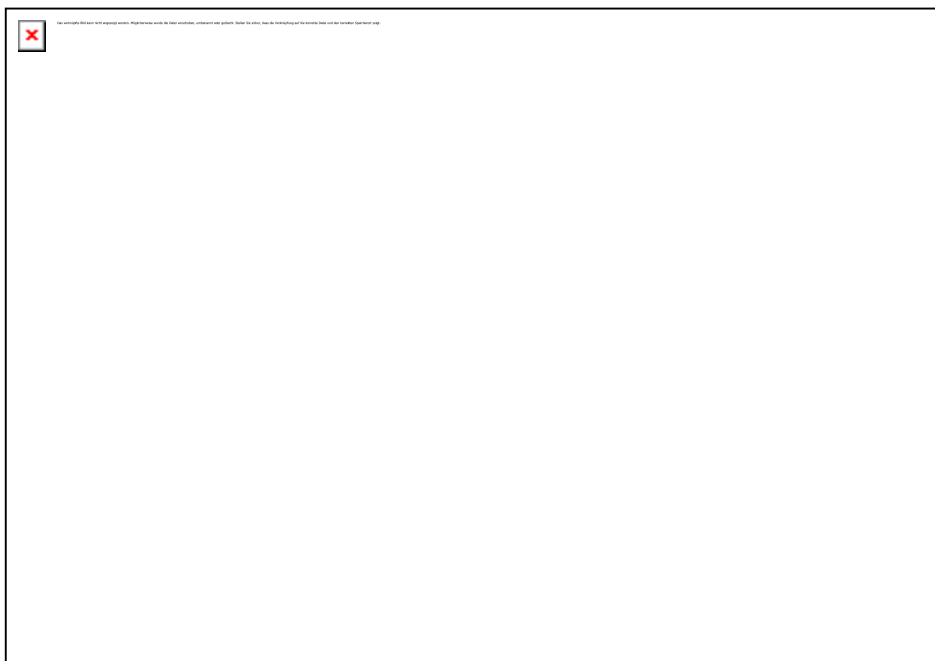

**Figure S53.**  $^{13}\text{C}\{^1\text{H}\}$  NMR (126 MHz,  $\text{C}_6\text{D}_6$ , 25 °C) spectrum of complex **3a'**. The peaks labelled with \* and # represent residual toluene and *n*-hexane, respectively.

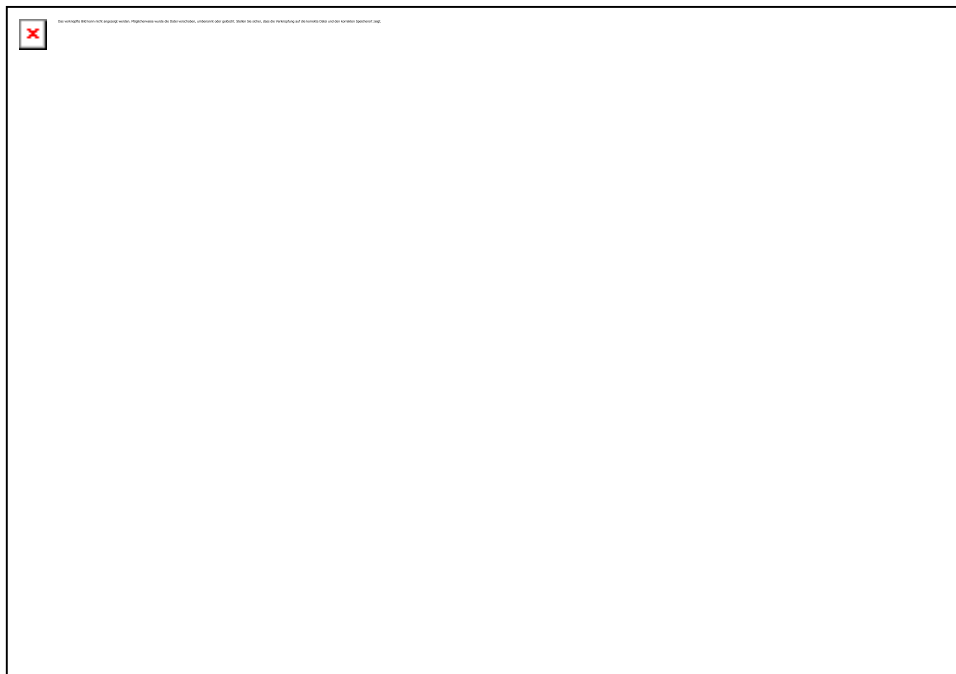

**Figure S54.**  $^1\text{H}$  NMR (500 MHz,  $\text{C}_6\text{D}_6$ , 25 °C) spectrum of complex **4a'**. The peaks labelled with \* and # represent residual toluene and *n*-hexane, respectively

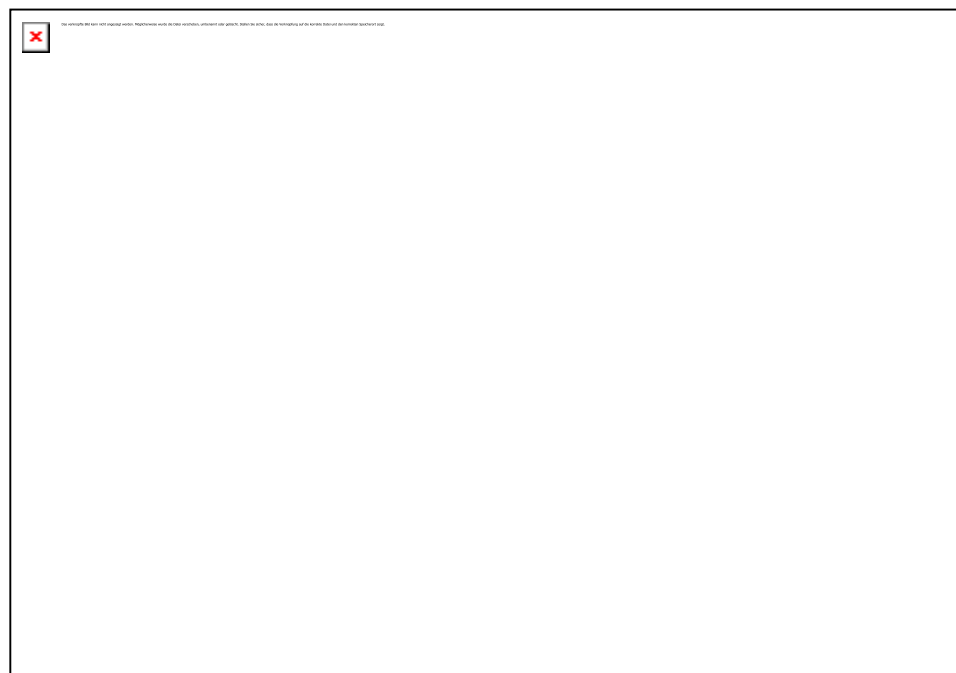

**Figure S55.**  $^{13}\text{C}\{^1\text{H}\}$  NMR (126 MHz,  $\text{C}_6\text{D}_6$ , 25 °C) spectrum of complex **4a'**. The peaks labelled with \* and # represent residual toluene and *n*-hexane, respectively.

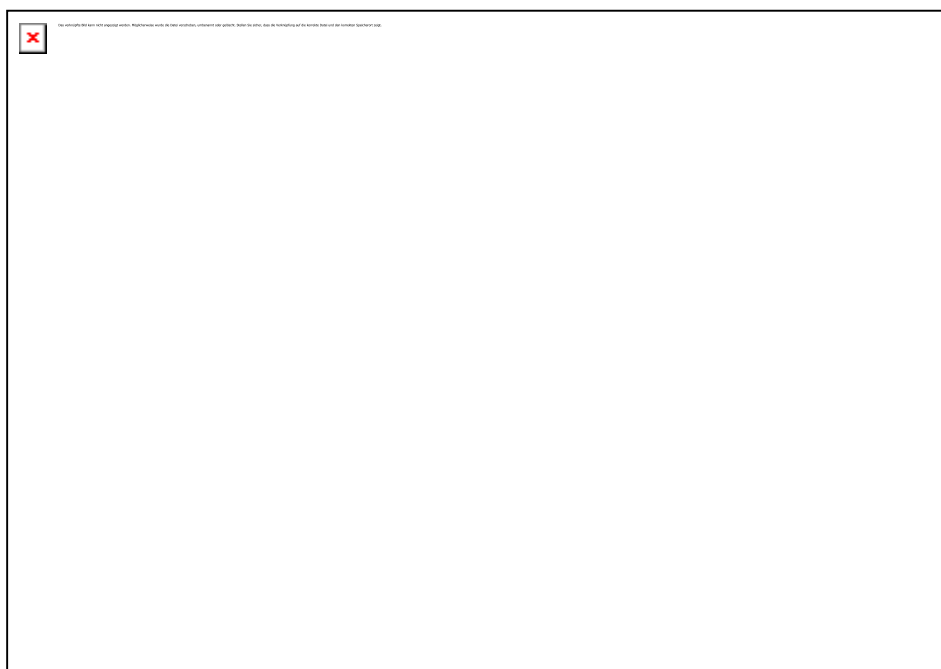

**Figure S56.**  $^1\text{H}$  NMR (500 MHz,  $\text{C}_6\text{D}_6$ , 25 °C) spectrum of complex **5c**. The peaks labelled with \* and # represent residual toluene and *n*-hexane, respectively.

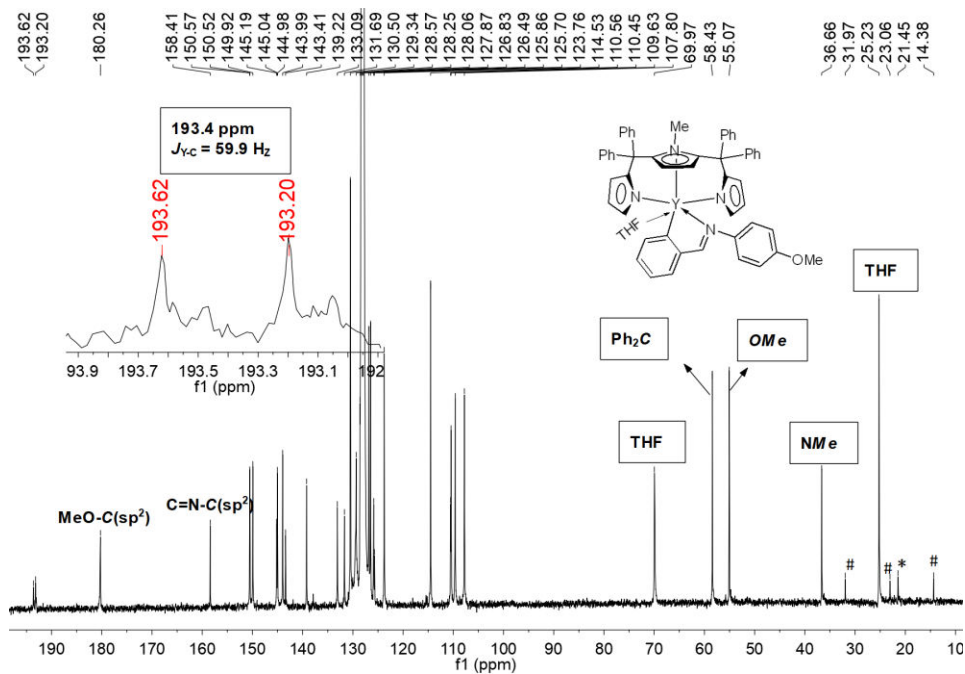

**Figure S57.**  $^{13}\text{C}\{^1\text{H}\}$  NMR (126 MHz,  $\text{C}_6\text{D}_6$ , 25 °C) spectrum of complex **5c**. The peaks labelled with \* and # represent residual toluene and *n*-hexane, respectively.

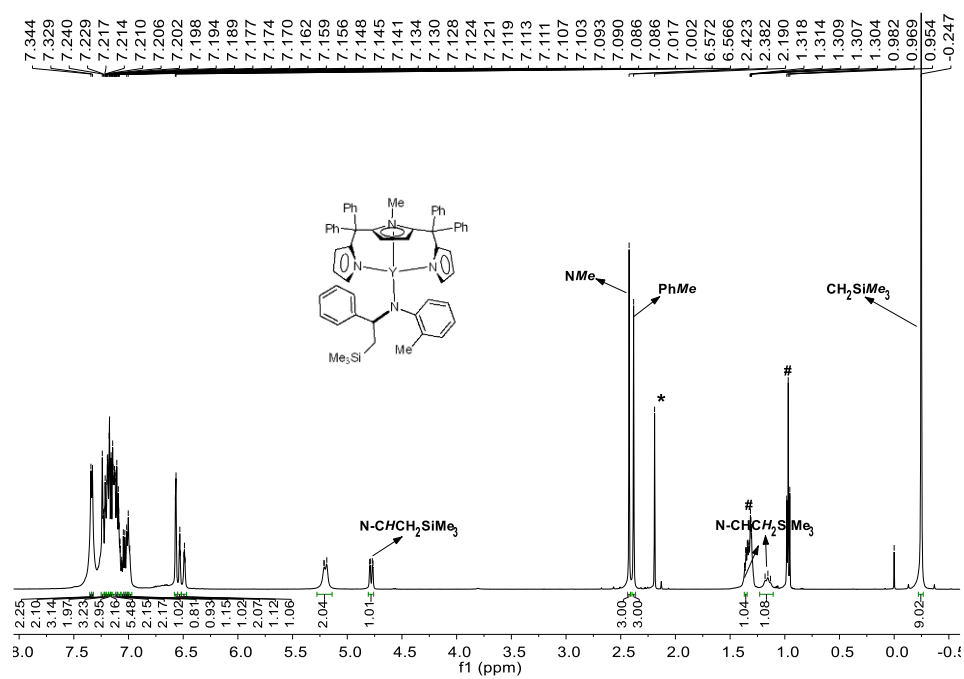

**Figure S58.**  $^1\text{H}$  NMR (500 MHz,  $\text{C}_6\text{D}_6$ , 25  $^\circ\text{C}$ ) spectrum of complex **6**. The peaks labelled with \* and # represent residual toluene and *n*-hexane, respectively.

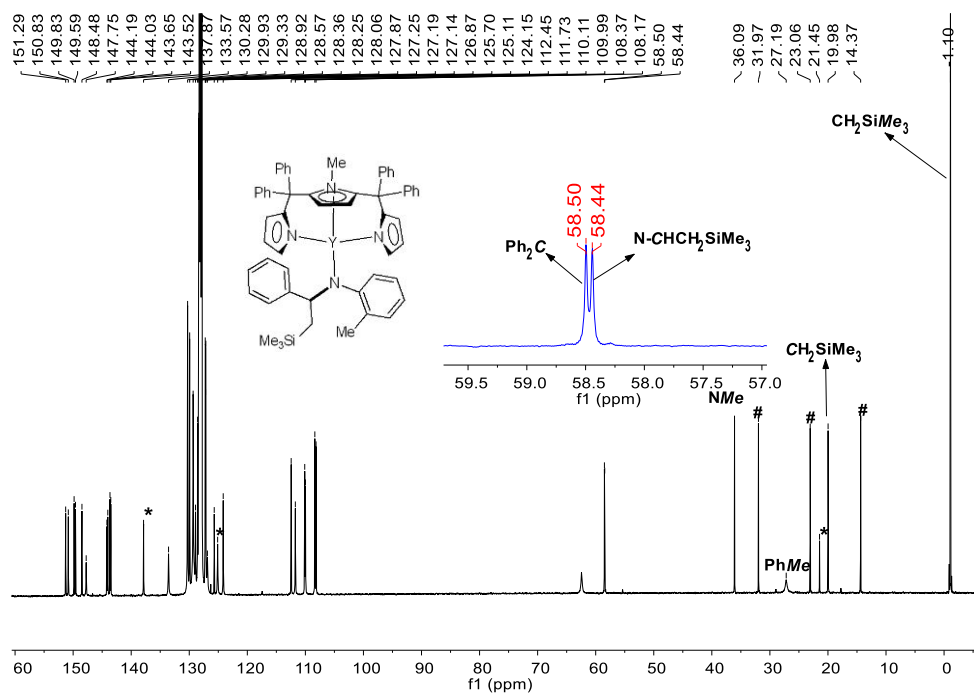

**Figure S59.**  $^{13}\text{C}\{^1\text{H}\}$  NMR (126 MHz,  $\text{C}_6\text{D}_6$ , 25  $^\circ\text{C}$ ) spectrum of complex **6**. The peaks labelled with \* and # represent residual toluene and *n*-hexane, respectively.

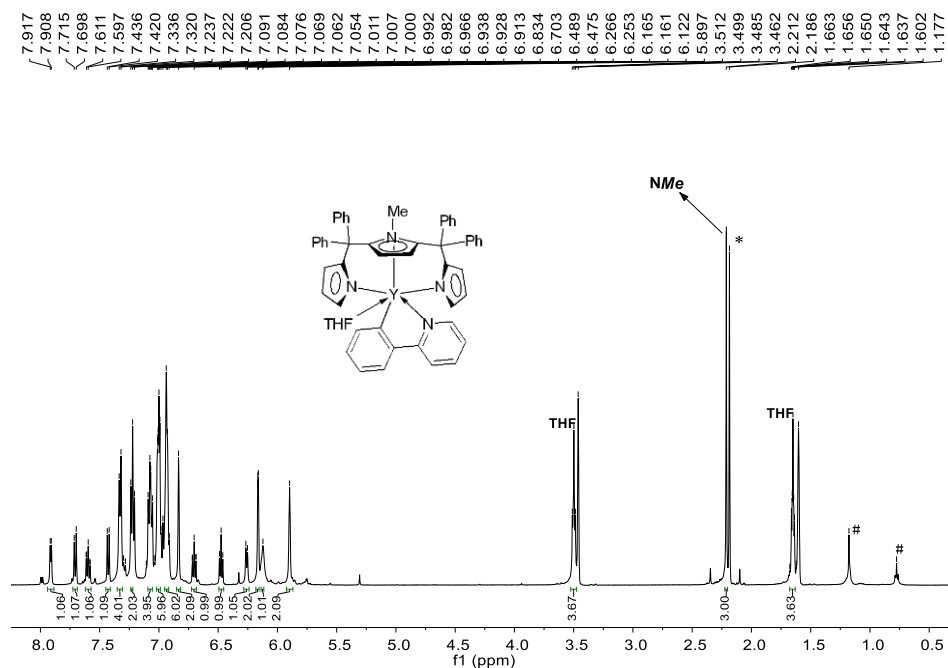

**Figure S60.**  $^1\text{H}$  NMR (500 MHz,  $\text{THF-}d_8$ , 25 °C) spectrum of complex **7j**. The peaks labelled with \* and # represent residual toluene and *n*-hexane, respectively.

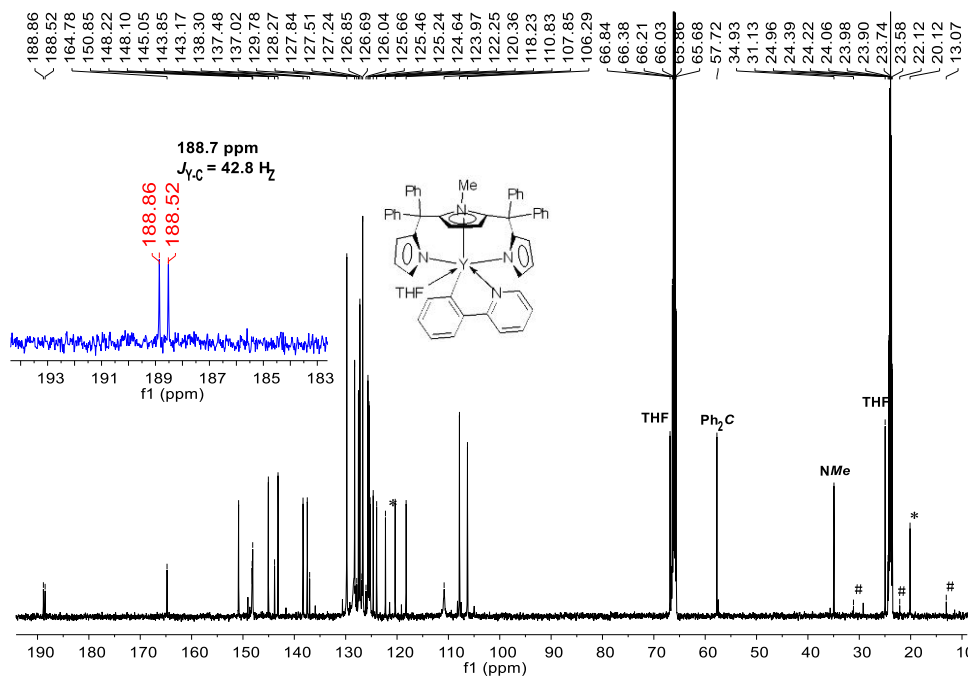

**Figure S61.**  $^{13}\text{C}\{^1\text{H}\}$  NMR (126 MHz,  $\text{THF-}d_8$ , 25 °C) spectrum of complex **7j**. The peaks labelled with \* and # represent residual toluene and *n*-hexane, respectively.

1. NMR monitoring the transformation of **3a'** to **2a'**

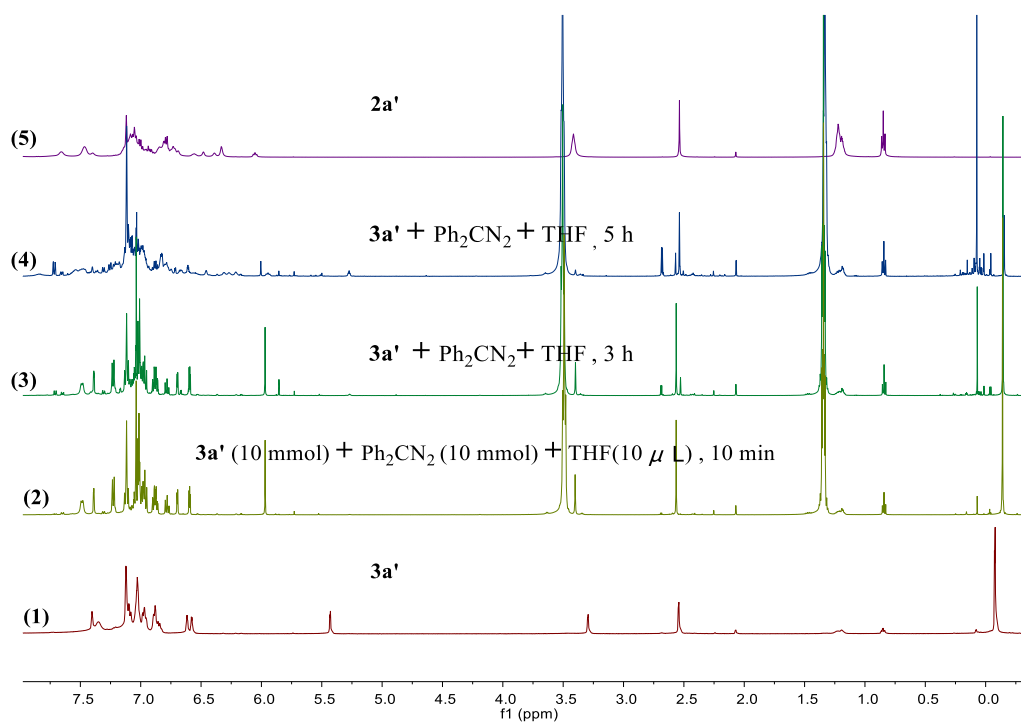

**Figure S62.**  $^1\text{H}$  NMR (500 MHz,  $\text{C}_6\text{D}_6$ ) monitoring the transformation of **3a'** to **2a'**.

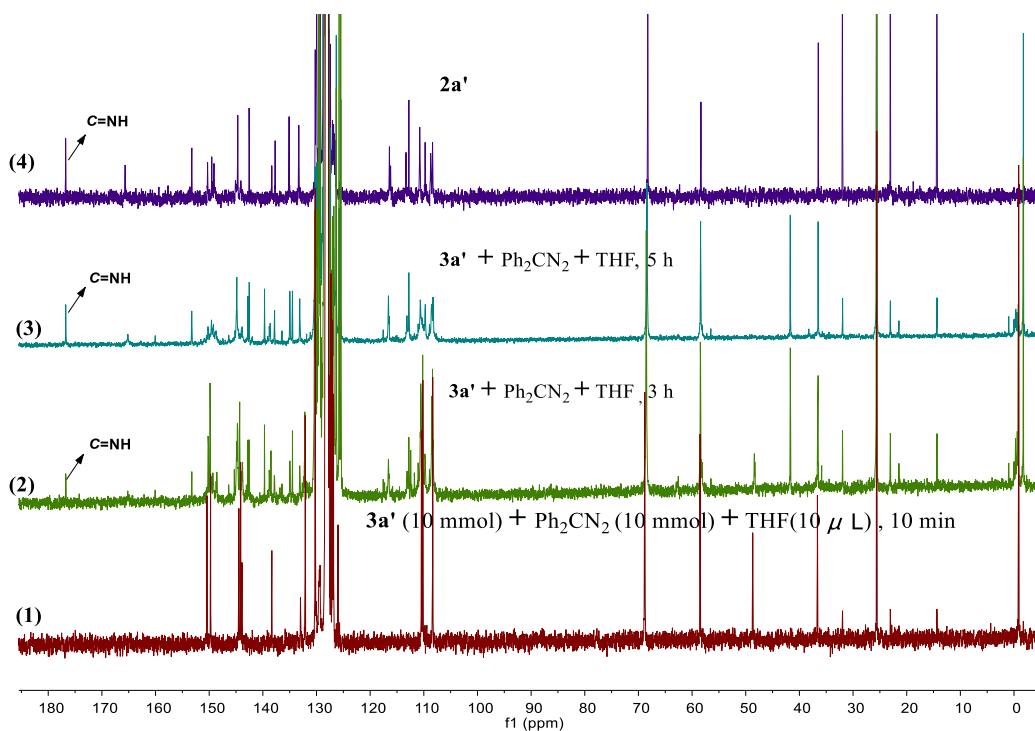

**Figure S63.**  $^{13}\text{C}\{^1\text{H}\}$  NMR (126 MHz,  $\text{C}_6\text{D}_6$ ) monitoring the transformation of **3a'** to **2a'**.

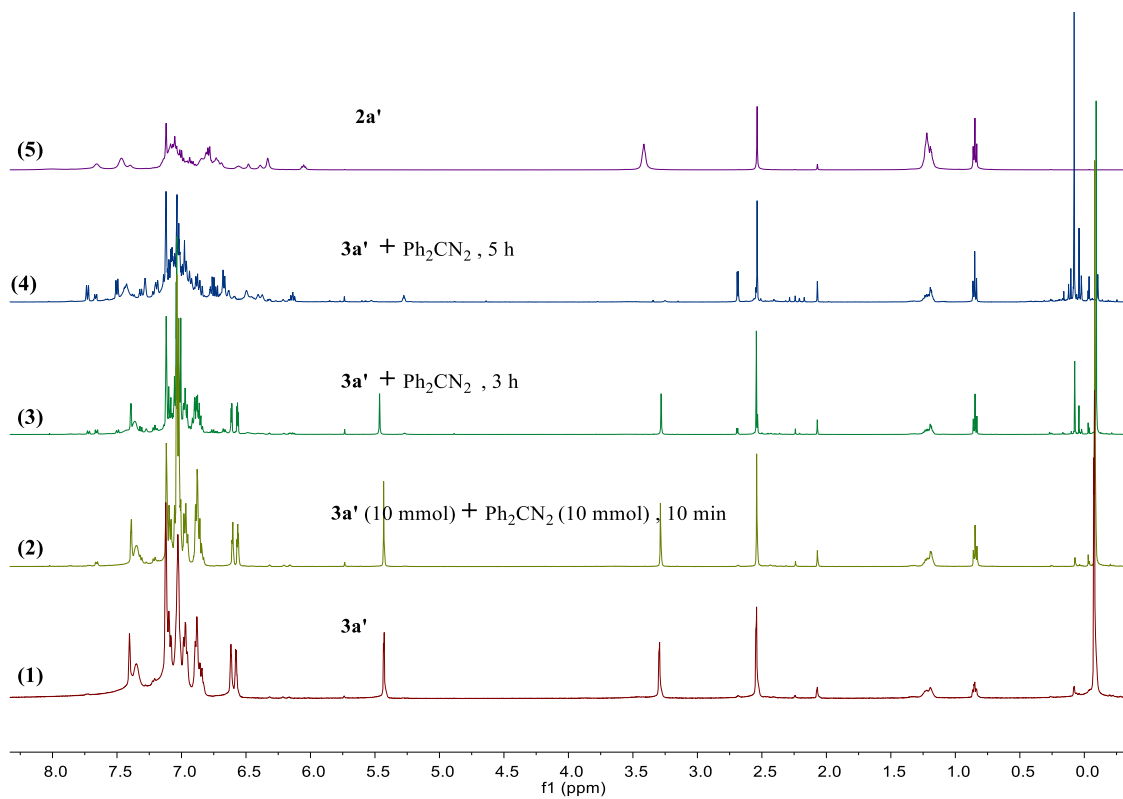

**Figure S64.**  $^1\text{H}$  NMR (500 MHz,  $\text{C}_6\text{D}_6$ ) monitoring the reaction of **3a'** with  $\text{Ph}_2\text{CN}_2$  in  $\text{C}_6\text{D}_6$ .

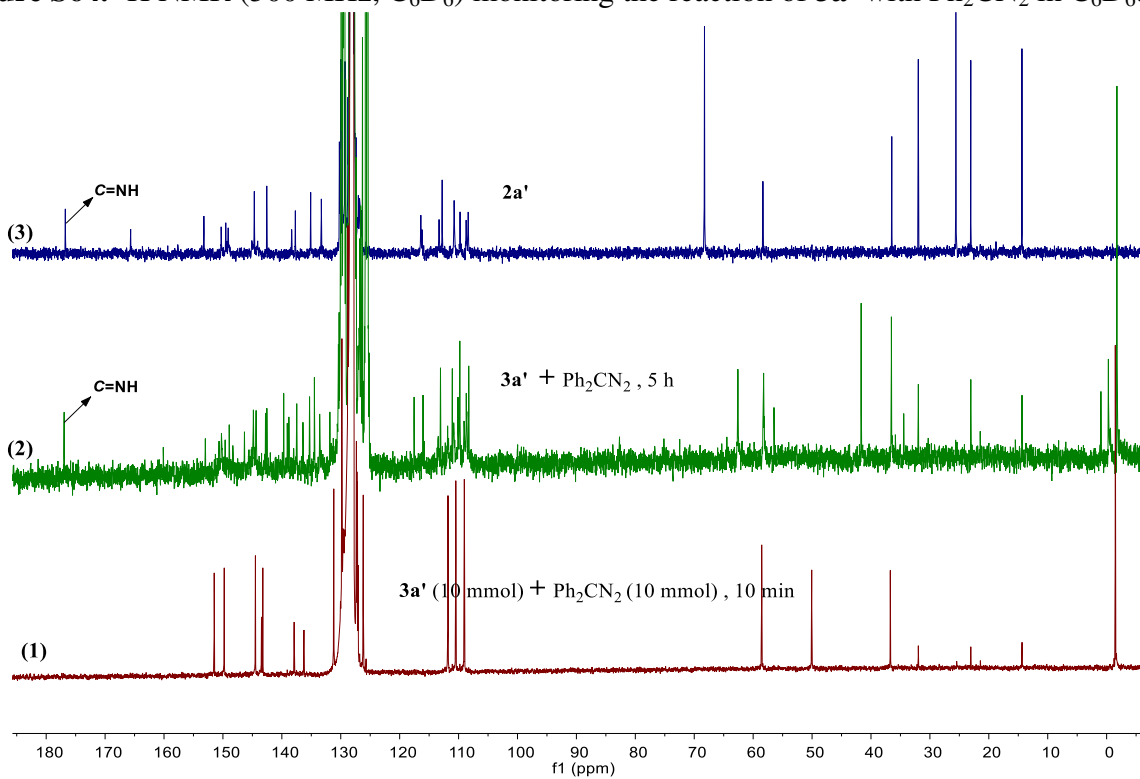

**Figure S65.**  $^{13}\text{C}\{^1\text{H}\}$  NMR (126 MHz) monitoring the reaction of **3a'** with  $\text{Ph}_2\text{CN}_2$  in  $\text{C}_6\text{D}_6$ .



## 2. NMR monitoring the transformation of 4a' to 2a'

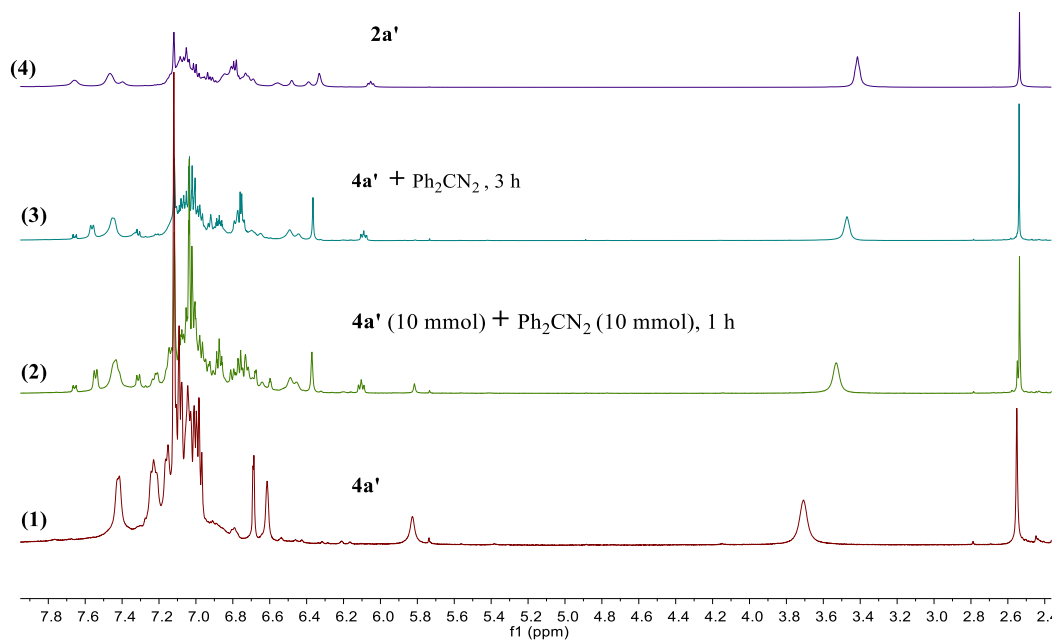

Figure S66.  $^1\text{H}$  NMR (500 MHz,  $\text{C}_6\text{D}_6$ ) monitoring the transformation of 4a' to 2a'.

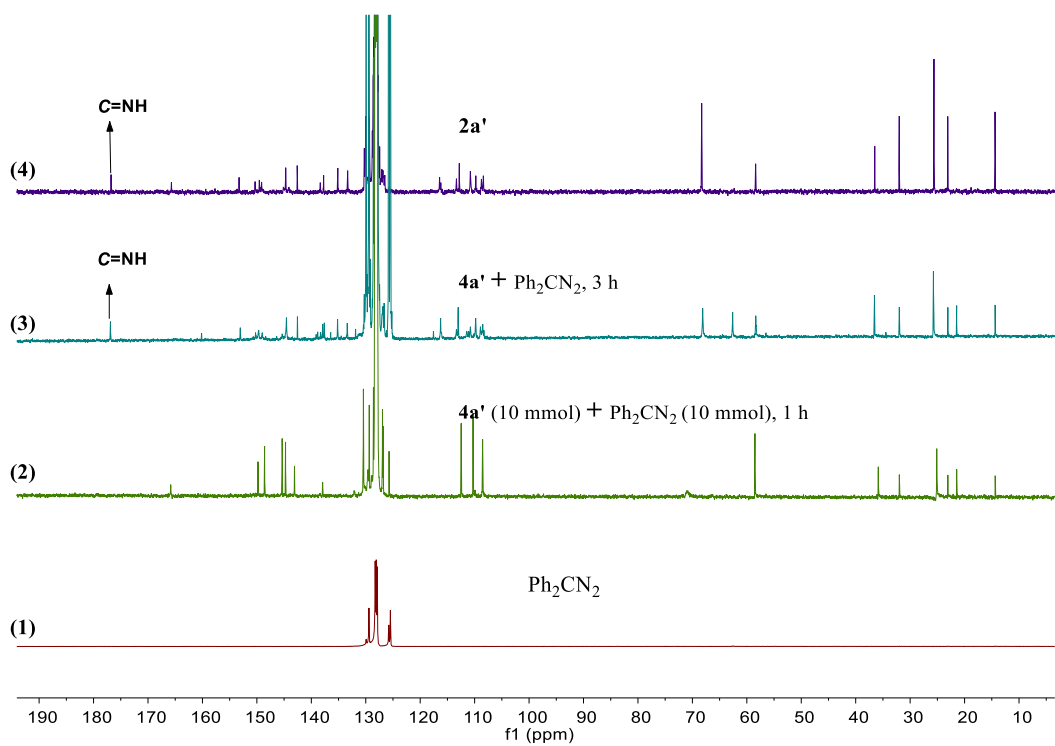

**Figure S67.**  $^{13}\text{C}\{^1\text{H}\}$  NMR (126 MHz,  $\text{C}_6\text{D}_6$ ) monitoring the transformation of **4a'** to **2a**

**Characterization of  $(\text{NHCH}_2\text{SiMe}_3)_2$ :** Under an argon atmosphere, to a clear colorless solution of **1a'** (1.50 g, 1.56 mmol) in 10 mL of toluene was added a brown solution of  $\text{Ph}_2\text{CN}_2$  (0.6 g, 3.13 mmol) in 8 mL of toluene at room temperature. The mixture was stirred for 5 h and the color of the solution gradually changed from red to dark red. Then,  $^{29}\text{Si}$  NMR (99 MHz,  $\text{C}_6\text{D}_6$ ) spectrum was performed, and a singlet -0.47 ppm was observed in the crude reaction. An aliquot (30  $\mu\text{L}$ ) from the mixture was diluted with  $\text{C}_6\text{D}_6$  to 0.5 mL and the crude mixture was performed by  $^1\text{H}$  NMR spectrum (Figure S67). Subsequently, the solvent of residual mixture was removed under vacuum, and 10 mL of *n*-hexane was added to extract organic compound. The volatiles of the extraction were removed under vacuum to give red oil. The red oil was performed by  $^1\text{H}$  NMR (Figure S68),  $^{13}\text{C}\{^1\text{H}\}$  NMR (Figure S69) and  $^1\text{H}$ - $^{13}\text{C}$  HSQC (Figure S70) spectra. It is failed to obtain a pure compound of  $(\text{NHCH}_2\text{SiMe}_3)_2$  by column chromatography or distillation, maybe probably because of its unstable nature.

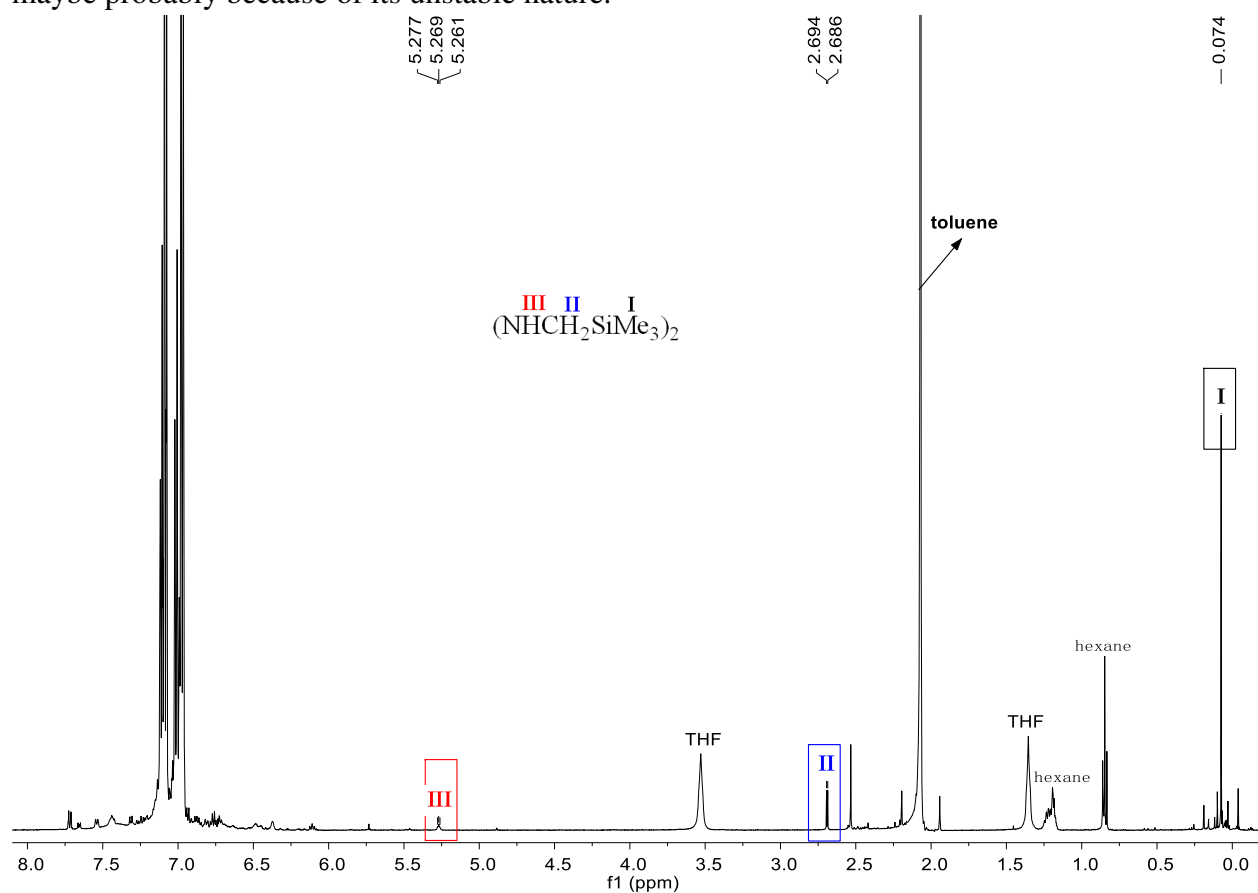

**Figure S68.**  $^1\text{H}$  NMR (500 MHz,  $\text{C}_6\text{D}_6$ , 25  $^\circ\text{C}$ ) spectrum of the crude mixture of **1a'** with  $\text{Ph}_2\text{CN}_2$  in toluene after 5 h at room temperature.

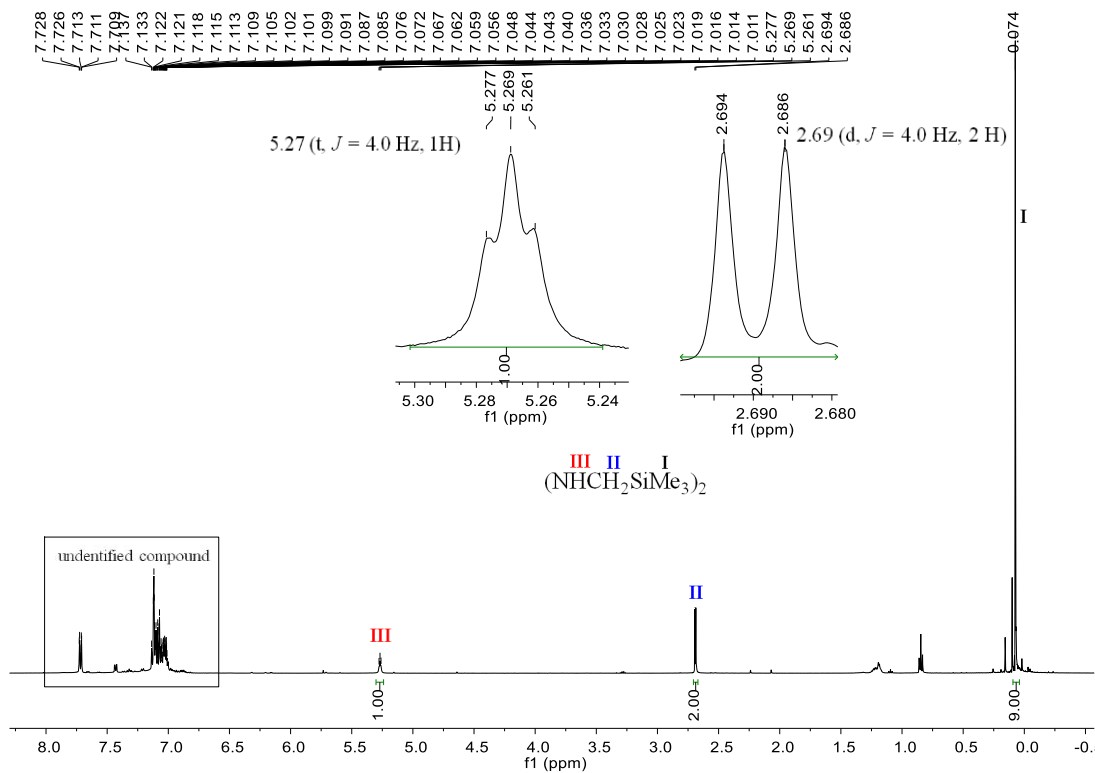

Figure S69. <sup>1</sup>H NMR (500 MHz, C<sub>6</sub>D<sub>6</sub>, 25 °C) spectrum of the red oil.

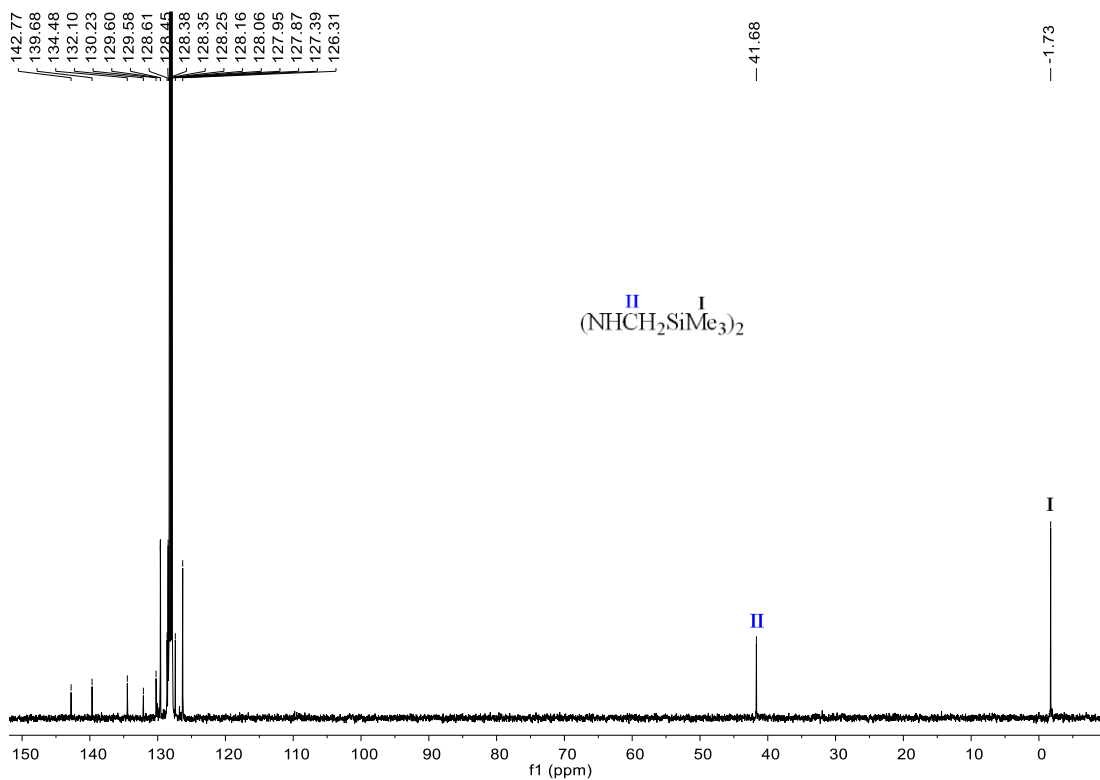

**Figure S70.**  $^{13}\text{C}\{^1\text{H}\}$  NMR (126 MHz,  $\text{C}_6\text{D}_6$ , 25 °C) spectrum of the red oil.

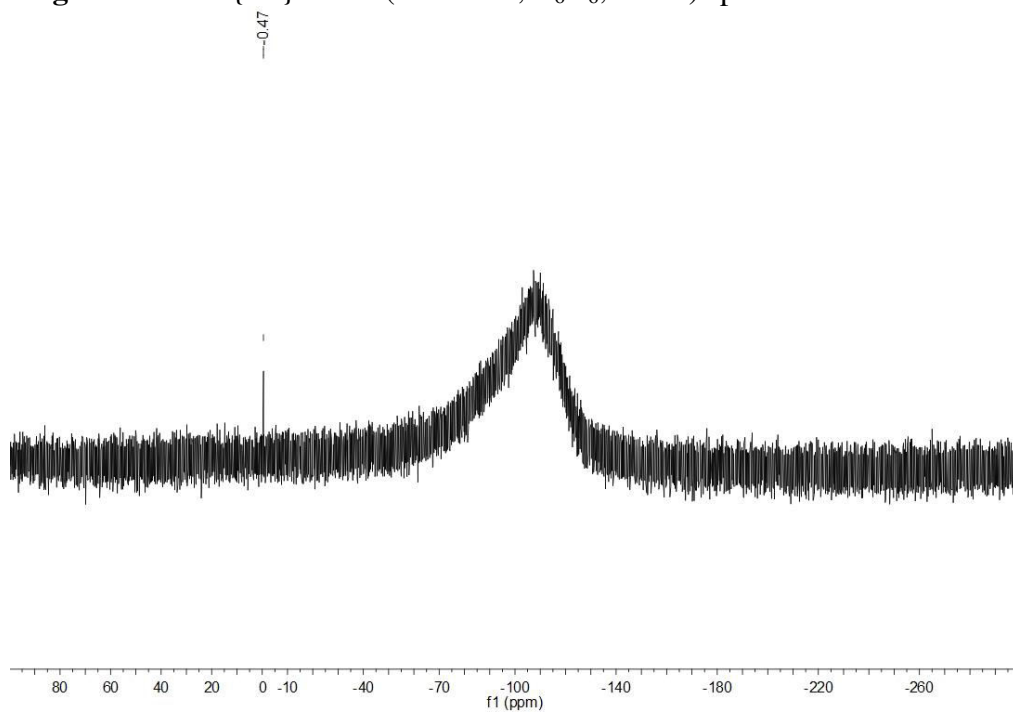

**Figure S71**  $^{29}\text{Si}$  NMR (99 MHz,  $\text{C}_6\text{D}_6$ ) spectrum of the crude reaction of **1a** with  $\text{Ph}_2\text{CN}_2$  after 5 h.

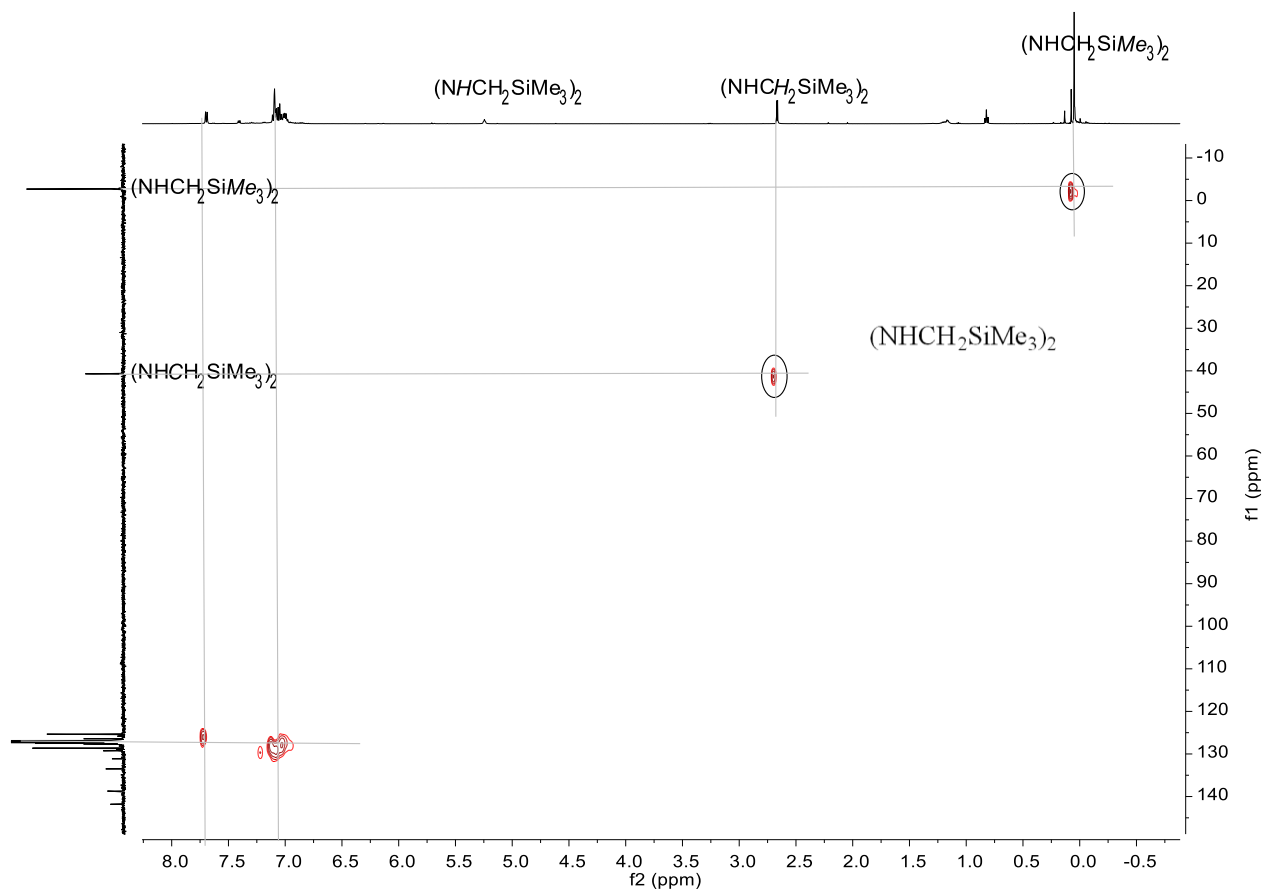

Figure S72.  $^1\text{H}$ - $^{13}\text{C}$  HSQC (500 MHz,  $\text{C}_6\text{D}_6$ , 25  $^\circ\text{C}$ ) spectrum of the red oil.

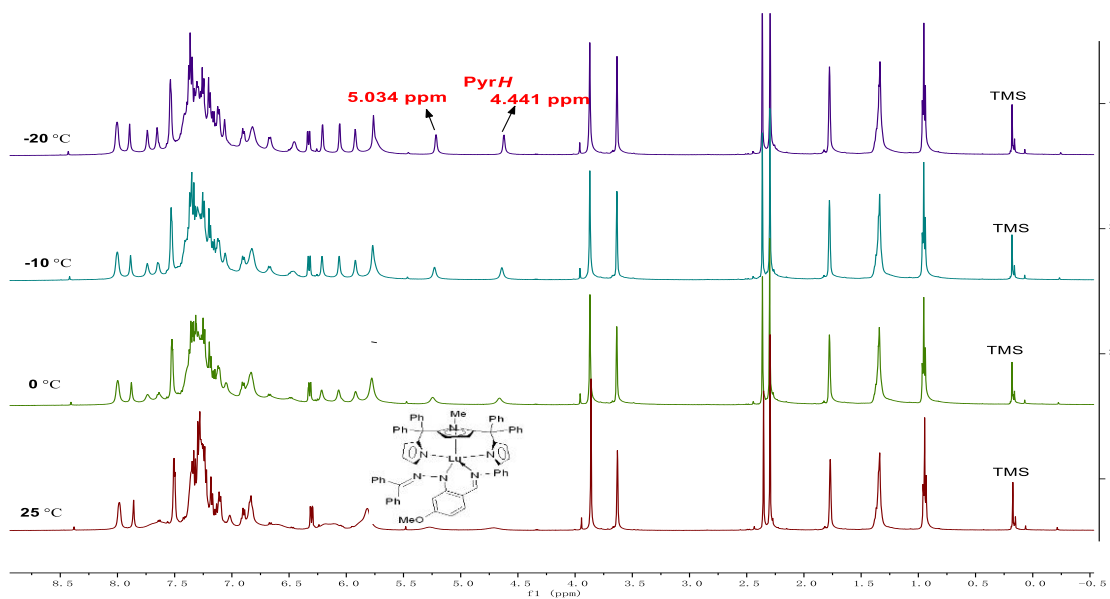

Figure S73.  $^1\text{H}$  NMR (500 MHz,  $\text{THF-}d_8$ , ppm) spectrum of **2d'** at different temperature.

## 7. DFT Study

## Computational Details

All the gas phase optimization calculations were performed using Gaussian 09 suite of programs.<sup>11</sup> For optimization, DFT hybrid functional (B3PW91)<sup>12</sup> along with small core pseudo potential Stuttgart basis set for yttrium, and silicon atoms with additional polarization functions<sup>13</sup> for silicon atoms and Pople style basis sets<sup>14</sup> (6-31G\*\*) for the rest of the atoms were employed. To locate the minima of the optimized structures for reactants, intermediates, products and maxima for transition state structures, frequency calculations were carried out on the optimized structures.

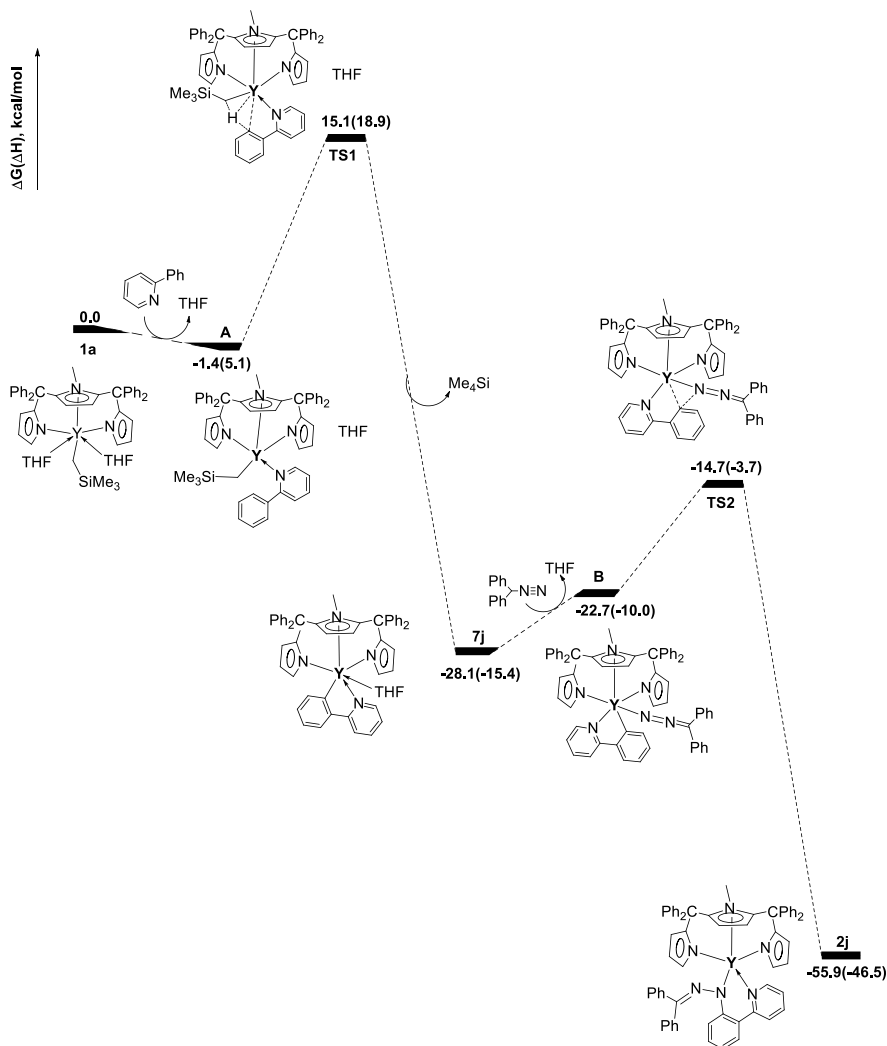

**Figure S74.** Energy (enthalpy between bracket) profiles for the reaction of **1a** with 2-phenylpyridine and  $\text{Ph}_2\text{CN}_2$ .

**Figure S75:** DFT computed MO's (a) HOMO-2 for **7j** (b) HOMO-2 for **B** (c) HOMO-3 for **TS2**. Isovalue=0.05

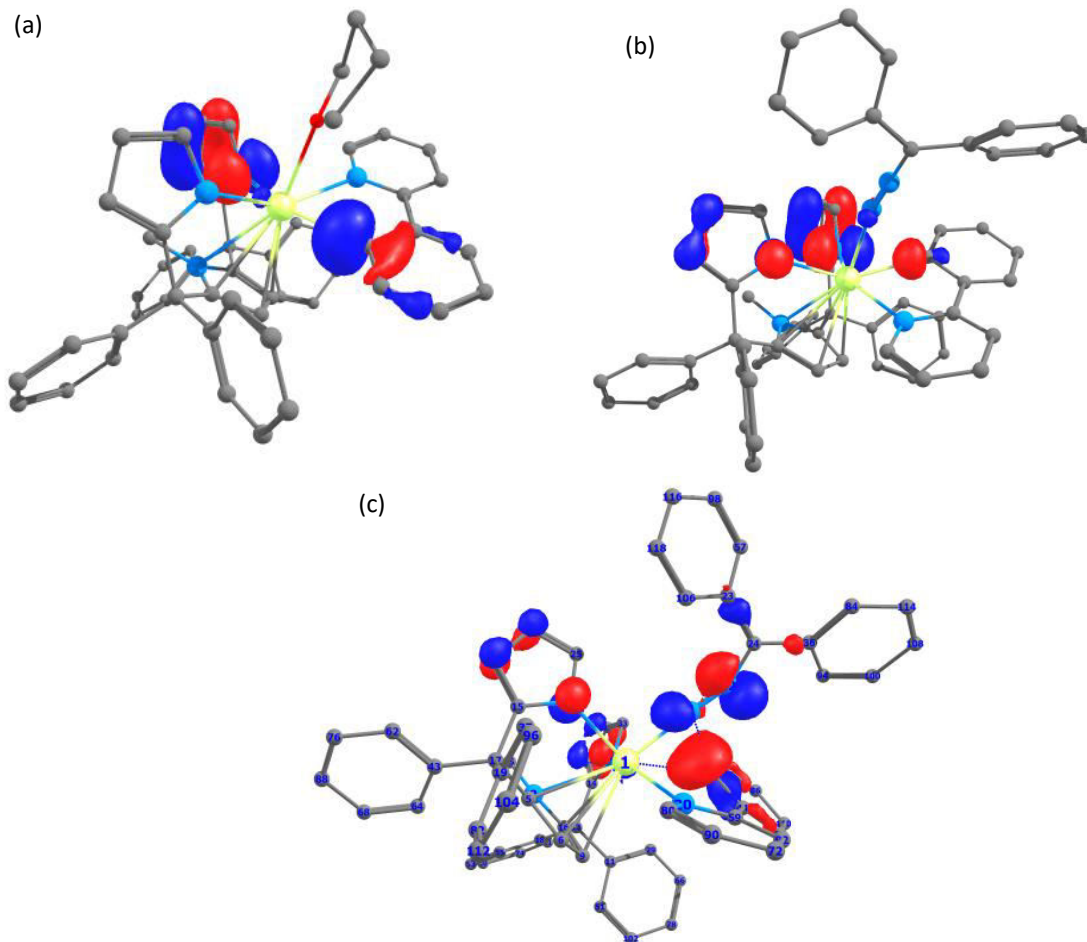

**Table S8:** DFT computed natural charges  
Atom Natural Charges

| Label | <b>1a</b> |
|-------|-----------|
| Y1    | 1.78313   |
| Si2   | 1.89939   |
| O3    | -0.62283  |
| O4    | -0.61072  |
| N5    | -0.74813  |
| N6    | -0.34988  |
| N7    | -0.74742  |
| C78   | -1.65307  |

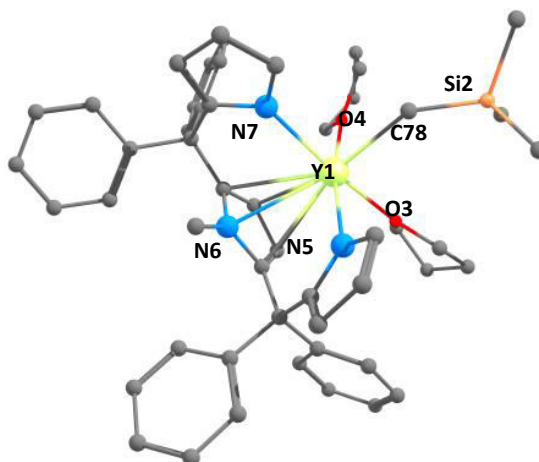

**Table S9: DFT computed NBO second order perturbation analysis**

| <b>1a</b><br>Donor NBO                                  | Acceptor NBO                                           | E(2)<br>kcal/mol |
|---------------------------------------------------------|--------------------------------------------------------|------------------|
| LP ( 1) C 78<br>s( 16.08%)p 5.22( 83.91%)d 0.00( 0.01%) | LP*( 1) Y 1<br>s( 10.27%)p 0.68( 6.97%)d 8.06( 82.76%) | 66.96            |
| LP ( 1) C 78<br>s( 16.08%)p 5.22( 83.91%)d 0.00( 0.01%) | LP*( 2) Y 1<br>s( 73.31%)p 0.01( 0.68%)d 0.35( 26.01%) | 8.92             |
| LP ( 2) O 3<br>s( 39.43%)p 1.54( 60.55%)d 0.00( 0.02%)  | LP*( 2) Y 1<br>s( 73.31%)p 0.01( 0.68%)d 0.35( 26.01%) | 8.23             |
| LP ( 2) O 3<br>s( 39.43%)p 1.54( 60.55%)d 0.00( 0.02%)  | LP*( 3) Y 1<br>s( 0.54%)p 6.67( 3.62%)d99.99( 95.84%)  | 15.38            |
| LP ( 2) O 3<br>s( 39.43%)p 1.54( 60.55%)d 0.00( 0.02%)  | LP*( 4) Y 1<br>s( 5.41%)p 0.38( 2.06%)d17.12( 92.54%)  | 7.24             |
| LP ( 2) O 3<br>s( 39.43%)p 1.54( 60.55%)d 0.00( 0.02%)  | LP*( 5) Y 1<br>s( 1.02%)p44.90( 45.76%)d52.22( 53.22%) | 11.24            |
| LP ( 2) O 3<br>s( 39.43%)p 1.54( 60.55%)d 0.00( 0.02%)  | LP*( 7) Y 1<br>s( 4.12%)p21.80( 89.74%)d 1.49( 6.15%)  | 8.00             |
| LP ( 2) O 4<br>s( 40.69%)p 1.46( 59.29%)d 0.00( 0.02%)  | LP*( 2) Y 1<br>s( 73.31%)p 0.01( 0.68%)d 0.35( 26.01%) | 11.23            |
| LP ( 2) O 4<br>s( 40.69%)p 1.46( 59.29%)d 0.00( 0.02%)  | LP*( 3) Y 1<br>s( 0.54%)p 6.67( 3.62%)d99.99( 95.84%)  | 10.67            |
| LP ( 2) O 4<br>s( 40.69%)p 1.46( 59.29%)d 0.00( 0.02%)  | LP*( 4) Y 1<br>s( 5.41%)p 0.38( 2.06%)d17.12( 92.54%)  | 12.21            |
| LP ( 2) O 4<br>s( 40.69%)p 1.46( 59.29%)d 0.00( 0.02%)  | LP*( 7) Y 1<br>s( 4.12%)p21.80( 89.74%)d 1.49( 6.15%)  | 9.48             |
| LP ( 1) N 5<br>s( 27.85%)p 2.59( 72.14%)d 0.00( 0.01%)  | LP*( 2) Y 1<br>s( 73.31%)p 0.01( 0.68%)d 0.35( 26.01%) | 25.70            |
| LP ( 1) N 5<br>s( 27.85%)p 2.59( 72.14%)d 0.00( 0.01%)  | LP*( 3) Y 1<br>s( 0.54%)p 6.67( 3.62%)d99.99( 95.84%)  | 19.65            |
| LP ( 1) N 7<br>s( 27.72%)p 2.61( 72.26%)d 0.00( 0.01%)  | LP*( 2) Y 1<br>s( 73.31%)p 0.01( 0.68%)d 0.35( 26.01%) | 17.68            |
| LP ( 1) N 7<br>s( 27.72%)p 2.61( 72.26%)d 0.00( 0.01%)  | LP*( 3) Y 1<br>s( 0.54%)p 6.67( 3.62%)d99.99( 95.84%)  | 28.50            |

**Table S10: DFT computed natural charges**

Atom Natural Charges

Label **7j**

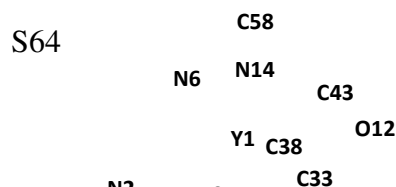



Y1 1.72205  
 N2 -0.35799  
 N6 -0.72544  
 N9 -0.73450  
 O12 -0.62110  
 N14 -0.53609  
 C33 -0.49650

**SD1: Bonding analysis from NBO computation for 7j**

**(1.97539) BD ( 1) N 14 - C 43**

( 60.13%) 0.7754\* N 14 s( 37.60%)p 1.66( 62.34%)d 0.00( 0.06%)

( 39.87%) 0.6314\* C 43 s( 28.74%)p 2.48( 71.15%)d 0.00( 0.11%)

**(1.71128) BD ( 2) N 14 - C 43**

( 64.79%) 0.8049\* N 14 s( 0.00%)p 1.00( 99.89%)d 0.00( 0.11%)

( 35.21%) 0.5934\* C 43 s( 0.00%)p 1.00( 99.88%)d 0.00( 0.12%)

**(1.95836) BD ( 1) C 33 - C 38**

( 47.01%) 0.6856\* C 33 s( 35.76%)p 1.79( 64.17%)d 0.00( 0.06%)

( 52.99%) 0.7280\* C 38 s( 35.47%)p 1.82( 64.50%)d 0.00( 0.03%)

**(1.55973) BD ( 2) C 33 - C 38**

( 42.52%) 0.6521\* C 33 s( 0.00%)p 1.00( 99.91%)d 0.00( 0.09%)

( 57.48%) 0.7581\* C 38 s( 0.00%)p 1.00( 99.99%)d 0.00( 0.01%)

**(1.97070) BD ( 1) C 38 - C 43**

( 49.16%) 0.7011\* C 38 s( 29.91%)p 2.34( 70.04%)d 0.00( 0.05%)

( 50.84%) 0.7130\* C 43 s( 35.04%)p 1.85( 64.93%)d 0.00( 0.04%)

**Table S11: DFT computed NBO second order perturbation analysis**

| 7j<br>Donor NBO            | Acceptor NBO        | E(2)<br>kcal/mol |
|----------------------------|---------------------|------------------|
| <u>BD ( 1) N 14 - C 43</u> | <u>LP* ( 2) Y 1</u> | 6.98             |

|                                                                |                                          |       |
|----------------------------------------------------------------|------------------------------------------|-------|
| ( 60.13%) 0.7754* N 14 s( 37.60%)p 1.66( 62.34%)d 0.00( 0.06%) | s( 31.98%)p 0.08( 2.54%)d 2.05( 65.48%)  |       |
| ( 39.87%) 0.6314* C 43 s( 28.74%)p 2.48( 71.15%)d 0.00( 0.11%) |                                          |       |
| <u>BD ( 1) N 14 - C 43</u>                                     | <u>LP*( 5) Y 1</u>                       | 8.32  |
| ( 60.13%) 0.7754* N 14 s( 37.60%)p 1.66( 62.34%)d 0.00( 0.06%) | s( 0.10%)p99.99( 44.83%)d99.99( 55.08%)  |       |
| ( 39.87%) 0.6314* C 43 s( 28.74%)p 2.48( 71.15%)d 0.00( 0.11%) |                                          |       |
| <u>BD ( 1) N 14 - C 58</u>                                     | <u>LP*( 2) Y 1</u>                       | 7.37  |
| ( 60.76%) 0.7795* N 14 s( 37.77%)p 1.65( 62.17%)d 0.00( 0.05%) | s( 31.98%)p 0.08( 2.54%)d 2.05( 65.48%)  |       |
| ( 39.24%) 0.6264* C 58 s( 29.53%)p 2.38( 70.35%)d 0.00( 0.12%) |                                          |       |
| <u>BD ( 1) N 14 - C 58</u>                                     | <u>LP*( 5) Y 1</u>                       | 8.18  |
| ( 60.76%) 0.7795* N 14 s( 37.77%)p 1.65( 62.17%)d 0.00( 0.05%) | s( 0.10%)p99.99( 44.83%)d99.99( 55.08%)  |       |
| ( 39.24%) 0.6264* C 58 s( 29.53%)p 2.38( 70.35%)d 0.00( 0.12%) |                                          |       |
| <u>BD ( 1) C 33 - C 38</u>                                     | <u>LP*( 1) Y 1</u>                       | 12.87 |
| ( 47.01%) 0.6856* C 33 s( 35.76%)p 1.79( 64.17%)d 0.00( 0.06%) | s( 30.32%)p 0.43( 13.10%)d 1.87( 56.58%) |       |
| ( 52.99%) 0.7280* C 38 s( 35.47%)p 1.82( 64.50%)d 0.00( 0.03%) |                                          |       |
| <u>BD ( 1) C 33 - C 56</u>                                     | <u>LP*( 1) Y 1</u>                       | 13.99 |
| ( 48.70%) 0.6979* C 33 s( 37.52%)p 1.66( 62.42%)d 0.00( 0.06%) | s( 30.32%)p 0.43( 13.10%)d 1.87( 56.58%) |       |
| ( 51.30%) 0.7162* C 56 s( 35.65%)p 1.80( 64.32%)d 0.00( 0.04%) |                                          |       |
| <u>LP ( 1) N 14</u>                                            | <u>LP*( 2) Y 1</u>                       | 27.56 |
| s( 24.56%)p 3.07( 75.41%)d 0.00( 0.03%)                        | s( 31.98%)p 0.08( 2.54%)d 2.05( 65.48%)  |       |
| <u>LP ( 1) N 14</u>                                            | <u>LP*( 5) Y 1</u>                       | 19.55 |
| s( 24.56%)p 3.07( 75.41%)d 0.00( 0.03%)                        | s( 0.10%)p99.99( 44.83%)d99.99( 55.08%)  |       |
| <u>LP ( 1) C 33</u>                                            | <u>LP*( 1) Y 1</u>                       | 83.78 |
| s( 26.48%)p 2.78( 73.51%)d 0.00( 0.01%)                        | s( 30.32%)p 0.43( 13.10%)d 1.87( 56.58%) |       |

**Table S12:** DFT computed natural charges

Atom Natural Charges

| Label | B        |
|-------|----------|
| Y1    | 1.59792  |
| N8    | -0.09408 |
| N12   | 0.09928  |
| N20   | -0.53473 |
| C35   | -0.41657 |
| C44   | -0.10562 |
| C59   | 0.25453  |

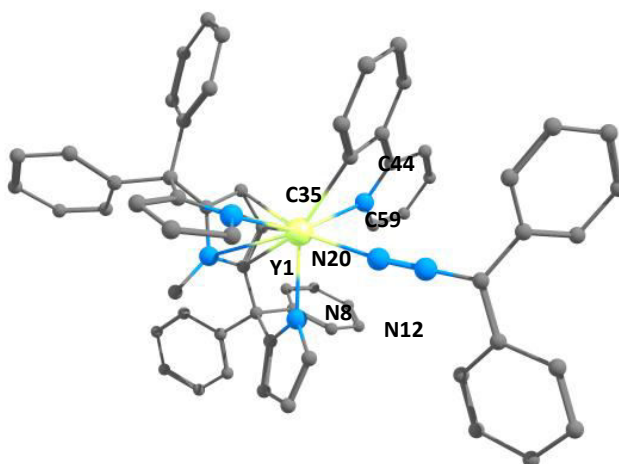

**SD2:** Bonding analysis from NBO computation for **B**

(1.97622) BD ( 1) N 20 - C 59

( 60.27%) 0.7763\* N 20 s( 37.86%)p 1.64( 62.09%)d 0.00( 0.06%)

( 39.73%) 0.6303\* C 59 s( 28.67%)p 2.48( 71.21%)d 0.00( 0.11%)  
(1.95822) BD ( 1) C 35 - C 44  
 ( 47.12%) 0.6865\* C 35 s( 35.50%)p 1.82( 64.44%)d 0.00( 0.06%)  
 ( 52.88%) 0.7272\* C 44 s( 35.34%)p 1.83( 64.63%)d 0.00( 0.03%)  
(1.56314) BD ( 2) C 35 - C 44  
 ( 43.09%) 0.6564\* C 35 s( 0.05%)p99.99( 99.87%)d 1.78( 0.09%)  
 ( 56.91%) 0.7544\* C 44 s( 0.01%)p 1.00( 99.98%)d 0.00( 0.01%)  
(1.97067) BD ( 1) C 44 - C 59  
 ( 49.25%) 0.7018\* C 44 s( 30.03%)p 2.33( 69.92%)d 0.00( 0.05%)  
 ( 50.75%) 0.7124\* C 59 s( 34.94%)p 1.86( 65.03%)d 0.00( 0.04%)

**Table S13: DFT computed NBO second order perturbation analysis**

| B<br>Donor NBO                                                                                                                                              | Acceptor NBO                                                   | E(2)<br>kcal/mol |
|-------------------------------------------------------------------------------------------------------------------------------------------------------------|----------------------------------------------------------------|------------------|
| <u>LP ( 1) N 8</u><br>s( 62.67%)p 0.60( 37.32%)d 0.00( 0.01%)                                                                                               | <u>LP*( 1) Y 1</u><br>s( 48.13%)p 0.31( 14.84%)d 0.77( 37.03%) | 22.32            |
| <u>LP ( 1) N 8</u><br>s( 62.67%)p 0.60( 37.32%)d 0.00( 0.01%)                                                                                               | <u>LP*( 2) Y 1</u><br>s( 6.24%)p 1.70( 10.58%)d13.33( 83.18%)  | 43.23            |
| <u>LP ( 1) N 8</u><br>s( 62.67%)p 0.60( 37.32%)d 0.00( 0.01%)                                                                                               | <u>LP*( 3) Y 1</u><br>s( 33.42%)p 0.23( 7.55%)d 1.77( 59.04%)  | 28.95            |
| 65. BD ( 1) C 35 - C 44<br>( 47.12%) 0.6865* C 35 s( 35.50%)p 1.82( 64.44%)d 0.00( 0.06%)<br>( 52.88%) 0.7272* C 44 s( 35.34%)p 1.83( 64.63%)d 0.00( 0.03%) | <u>LP*( 1) Y 1</u><br>s( 48.13%)p 0.31( 14.84%)d 0.77( 37.03%) | 11.06            |
| <u>LP ( 1) N 20</u><br>s( 24.50%)p 3.08( 75.47%)d 0.00( 0.03%)                                                                                              | <u>LP*( 2) Y 1</u><br>s( 6.24%)p 1.70( 10.58%)d13.33( 83.18%)  | 10.29            |
| <u>LP ( 1) N 20</u><br>s( 24.50%)p 3.08( 75.47%)d 0.00( 0.03%)                                                                                              | <u>LP*( 1) Y 1</u><br>s( 48.13%)p 0.31( 14.84%)d 0.77( 37.03%) | 7.20             |
| <u>LP ( 1) N 20</u><br>s( 24.50%)p 3.08( 75.47%)d 0.00( 0.03%)                                                                                              | <u>LP*( 6) Y 1</u><br>s( 0.24%)p99.99( 63.32%)d99.99( 36.44%)  | 14.03            |
| <u>LP ( 1) C 35</u><br>s( 26.23%)p 2.81( 73.76%)d 0.00( 0.01%)                                                                                              | <u>LP*( 1) Y 1</u><br>s( 48.13%)p 0.31( 14.84%)d 0.77( 37.03%) | 77.15            |

**Table S14: DFT computed natural charges**

Atom Natural Charges  
 Label TS2

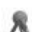

S67

C44

C35

C59

Y1 1.67650  
 N8 -0.32626  
 N12 -0.05994  
 N20 -0.52962  
 C35 -0.19446  
 C44 -0.09764  
 C59 0.24999

**SD3: Bonding analysis from NBO computation for TS2**

(1.97557) BD ( 1) N 20 - C 59

( 60.13%) 0.7754\* N 20 s( 37.71%)p 1.65( 62.24%)d 0.00( 0.06%)

( 39.87%) 0.6314\* C 59 s( 28.93%)p 2.45( 70.96%)d 0.00( 0.11%)

(1.82562) BD ( 1) N 8 - C 35

( 42.97%) 0.6555\* N 8 s( 3.03%)p31.99( 96.92%)d 0.01( 0.05%)

( 57.03%) 0.7552\* C 35 s( 21.08%)p 3.74( 78.91%)d 0.00( 0.00%)

(1.95667) BD ( 1) C 35 - C 44

( 47.85%) 0.6918\* C 35 s( 37.95%)p 1.63( 62.00%)d 0.00( 0.06%)

( 52.15%) 0.7221\* C 44 s( 34.72%)p 1.88( 65.24%)d 0.00( 0.03%)

(1.62397) BD ( 2) C 35 - C 44

( 50.60%) 0.7114\* C 35 s( 1.50%)p65.47( 98.45%)d 0.03( 0.05%)

( 49.40%) 0.7028\* C 44 s( 0.05%)p99.99( 99.93%)d 0.50( 0.02%)

(1.96808) BD ( 1) C 44 - C 59

( 49.86%) 0.7061\* C 44 s( 30.61%)p 2.27( 69.34%)d 0.00( 0.05%)

( 50.14%) 0.7081\* C 59 s( 34.29%)p 1.91( 65.67%)d 0.00( 0.04%)

**Table S15: DFT computed NBO second order perturbation analysis**

TS2  
 Donor NBO

Acceptor NBO

E(2)  
 kcal/mol

|                                                                |                                         |       |
|----------------------------------------------------------------|-----------------------------------------|-------|
| <u>244. LP ( 1) N 8</u>                                        | <u>LP*( 1) Y 1</u>                      | 36.50 |
| s( 58.93%)p 0.70( 41.06%)d 0.00( 0.00%)                        | s( 2.06%)p 1.80( 3.71%)d45.65( 94.23%)  |       |
| <u>244. LP ( 1) N 8</u>                                        | <u>LP*( 2) Y 1</u>                      | 25.09 |
| s( 58.93%)p 0.70( 41.06%)d 0.00( 0.00%)                        | s( 84.50%)p 0.04( 3.70%)d 0.14( 11.80%) |       |
| <u>244. LP ( 1) N 8</u>                                        | <u>LP*( 3) Y 1</u>                      | 10.07 |
| s( 58.93%)p 0.70( 41.06%)d 0.00( 0.00%)                        | s( 2.13%)p13.27( 28.24%)d32.72( 69.63%) |       |
| <u>244. LP ( 1) N 8</u>                                        | <u>LP*( 4) Y 1</u>                      | 27.22 |
| s( 58.93%)p 0.70( 41.06%)d 0.00( 0.00%)                        | s( 4.01%)p 5.92( 23.72%)d18.03( 72.27%) |       |
| <u>LP ( 1) N 20</u>                                            | <u>LP*( 2) Y 1</u>                      | 9.36  |
| s( 24.56%)p 3.07( 75.41%)d 0.00( 0.03%)                        | s( 84.50%)p 0.04( 3.70%)d 0.14( 11.80%) |       |
| <u>LP ( 1) N 20</u>                                            | <u>LP*( 6) Y 1</u>                      | 19.45 |
| s( 24.56%)p 3.07( 75.41%)d 0.00( 0.03%)                        | s( 0.30%)p99.99( 74.40%)d83.86( 25.30%) |       |
| <u>BD ( 1) N 8 - C 35</u>                                      | <u>LP*( 4) Y 1</u>                      | 34.92 |
| ( 42.97%) 0.6555* N 8 s( 3.03%)p31.99( 96.92%)d 0.01( 0.05%)   | s( 4.01%)p 5.92( 23.72%)d18.03( 72.27%) |       |
| ( 57.03%) 0.7552* C 35 s( 21.08%)p 3.74( 78.91%)d 0.00( 0.00%) |                                         |       |
| <u>BD ( 1) C 35 - C 44</u>                                     | <u>LP*( 4) Y 1</u>                      | 11.06 |
| ( 47.85%) 0.6918* C 35 s( 37.95%)p 1.63( 62.00%)d 0.00( 0.06%) | s( 4.01%)p 5.92( 23.72%)d18.03( 72.27%) |       |
| ( 52.15%) 0.7221* C 44 s( 34.72%)p 1.88( 65.24%)d 0.00( 0.03%) |                                         |       |

**Table S16:** DFT computed natural charges

| Atom  | Natural Charges |
|-------|-----------------|
| Label | 2j              |
| Y1    | 1.83470         |
| N8    | -0.60360        |
| N12   | -0.26720        |
| N20   | -0.58936        |
| C35   | 0.18268         |
| C44   | -0.16098        |
| C59   | 0.25422         |

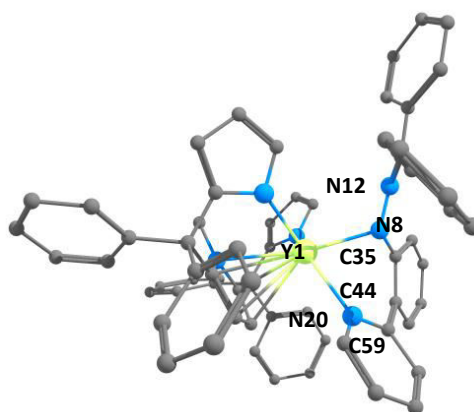

**SD4:** Bonding analysis from NBO computation for **2j**

(1.97432) BD ( 1) N 20 - C 59

( 60.28%) 0.7764\* N 20 s( 38.00%)p 1.63( 61.94%)d 0.00( 0.05%)

( 39.72%) 0.6302\* C 59 s( 28.80%)p 2.47( 71.08%)d 0.00( 0.11%)

(1.96388) BD ( 1) C 44 - C 59

( 49.70%) 0.7050\* C 44 s( 31.49%)p 2.17( 68.47%)d 0.00( 0.05%)

( 50.30%) 0.7092\* C 59 s( 34.98%)p 1.86( 64.98%)d 0.00( 0.04%)

(1.95273) BD ( 1) C 35 - C 44

( 49.36%) 0.7026\* C 35 s( 34.11%)p 1.93( 65.85%)d 0.00( 0.04%)

( 50.64%) 0.7116\* C 44 s( 34.16%)p 1.93( 65.80%)d 0.00( 0.04%)

(1.59746) BD ( 2) C 35 - C 44

( 42.62%) 0.6528\* C 35 s( 0.09%)p99.99( 99.87%)d 0.43( 0.04%)

( 57.38%) 0.7575\* C 44 s( 0.04%)p99.99( 99.95%)d 0.29( 0.01%)

(1.97057) BD ( 1) N 8 - C 35

( 58.81%) 0.7669\* N 8 s( 37.64%)p 1.66( 62.30%)d 0.00( 0.07%)

( 41.19%) 0.6418\* C 35 s( 29.49%)p 2.39( 70.40%)d 0.00( 0.10%)

### Table S17: DFT computed NBO second order perturbation analysis

| 2j                            | Donor NBO                                                                                                                        | Acceptor NBO                                           | E(2)<br>kcal/mol |
|-------------------------------|----------------------------------------------------------------------------------------------------------------------------------|--------------------------------------------------------|------------------|
| (1.97540) BD ( 1) N 8 - N 12  | ( 50.51%) 0.7107* N 8 s( 25.18%)p 2.97( 74.69%)d 0.01( 0.13%)<br>( 49.49%) 0.7035* N 12 s( 24.32%)p 3.11( 75.55%)d 0.01( 0.13%)  | LP*( 1) Y 1<br>s( 0.63%)p13.99( 8.80%)d99.99( 90.57%)  | 11.73            |
| (1.97057) BD ( 1) N 8 - C 35  | ( 58.81%) 0.7669* N 8 s( 37.64%)p 1.66( 62.30%)d 0.00( 0.07%)<br>( 41.19%) 0.6418* C 35 s( 29.49%)p 2.39( 70.40%)d 0.00( 0.10%)  | LP*( 1) Y 1<br>s( 0.63%)p13.99( 8.80%)d99.99( 90.57%)  | 15.03            |
| (1.97432) BD ( 1) N 20 - C 59 | ( 60.28%) 0.7764* N 20 s( 38.00%)p 1.63( 61.94%)d 0.00( 0.05%)<br>( 39.72%) 0.6302* C 59 s( 28.80%)p 2.47( 71.08%)d 0.00( 0.11%) | LP*( 6) Y 1<br>s( 2.29%)p30.01( 68.80%)d12.61( 28.91%) | 9.43             |
| LP ( 1) N 8                   | s( 37.12%)p 1.69( 62.84%)d 0.00( 0.03%)                                                                                          | LP*( 1) Y 1<br>s( 0.63%)p13.99( 8.80%)d99.99( 90.57%)  | 48.78            |
| LP ( 1) N 8                   | s( 37.12%)p 1.69( 62.84%)d 0.00( 0.03%)                                                                                          | LP*( 2) Y 1<br>s( 32.98%)p 0.30( 9.83%)d 1.73( 57.19%) | 10.50            |
| LP ( 1) N 20                  | s( 24.16%)p 3.14( 75.81%)d 0.00( 0.02%)                                                                                          | LP*( 6) Y 1<br>s( 2.29%)p30.01( 68.80%)d12.61( 28.91%) | 16.50            |

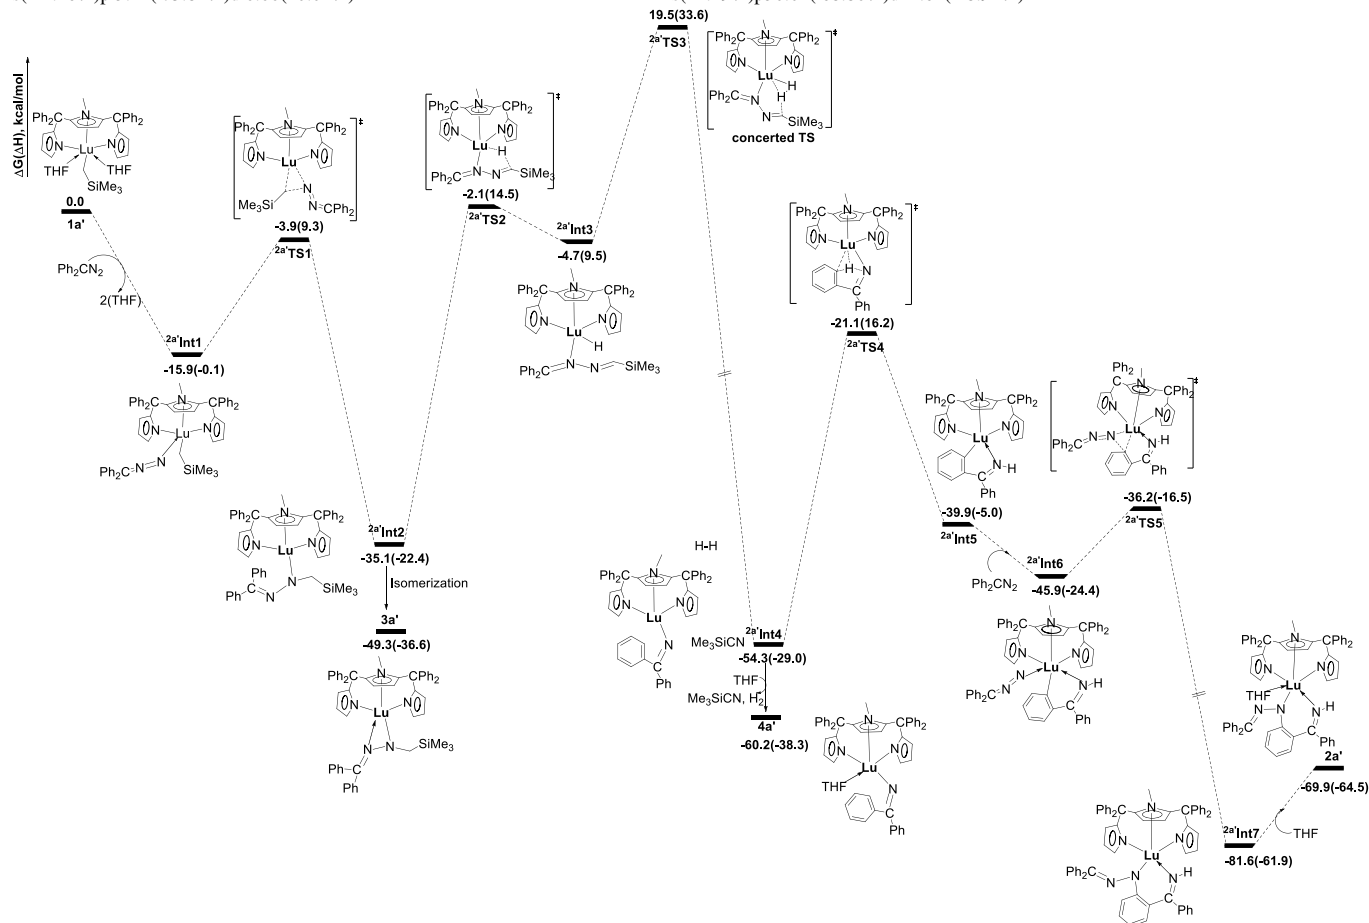

Figure S76. Energy (enthalpy between bracket) profiles for the reaction of 1a' with Ph<sub>2</sub>CN<sub>2</sub>.

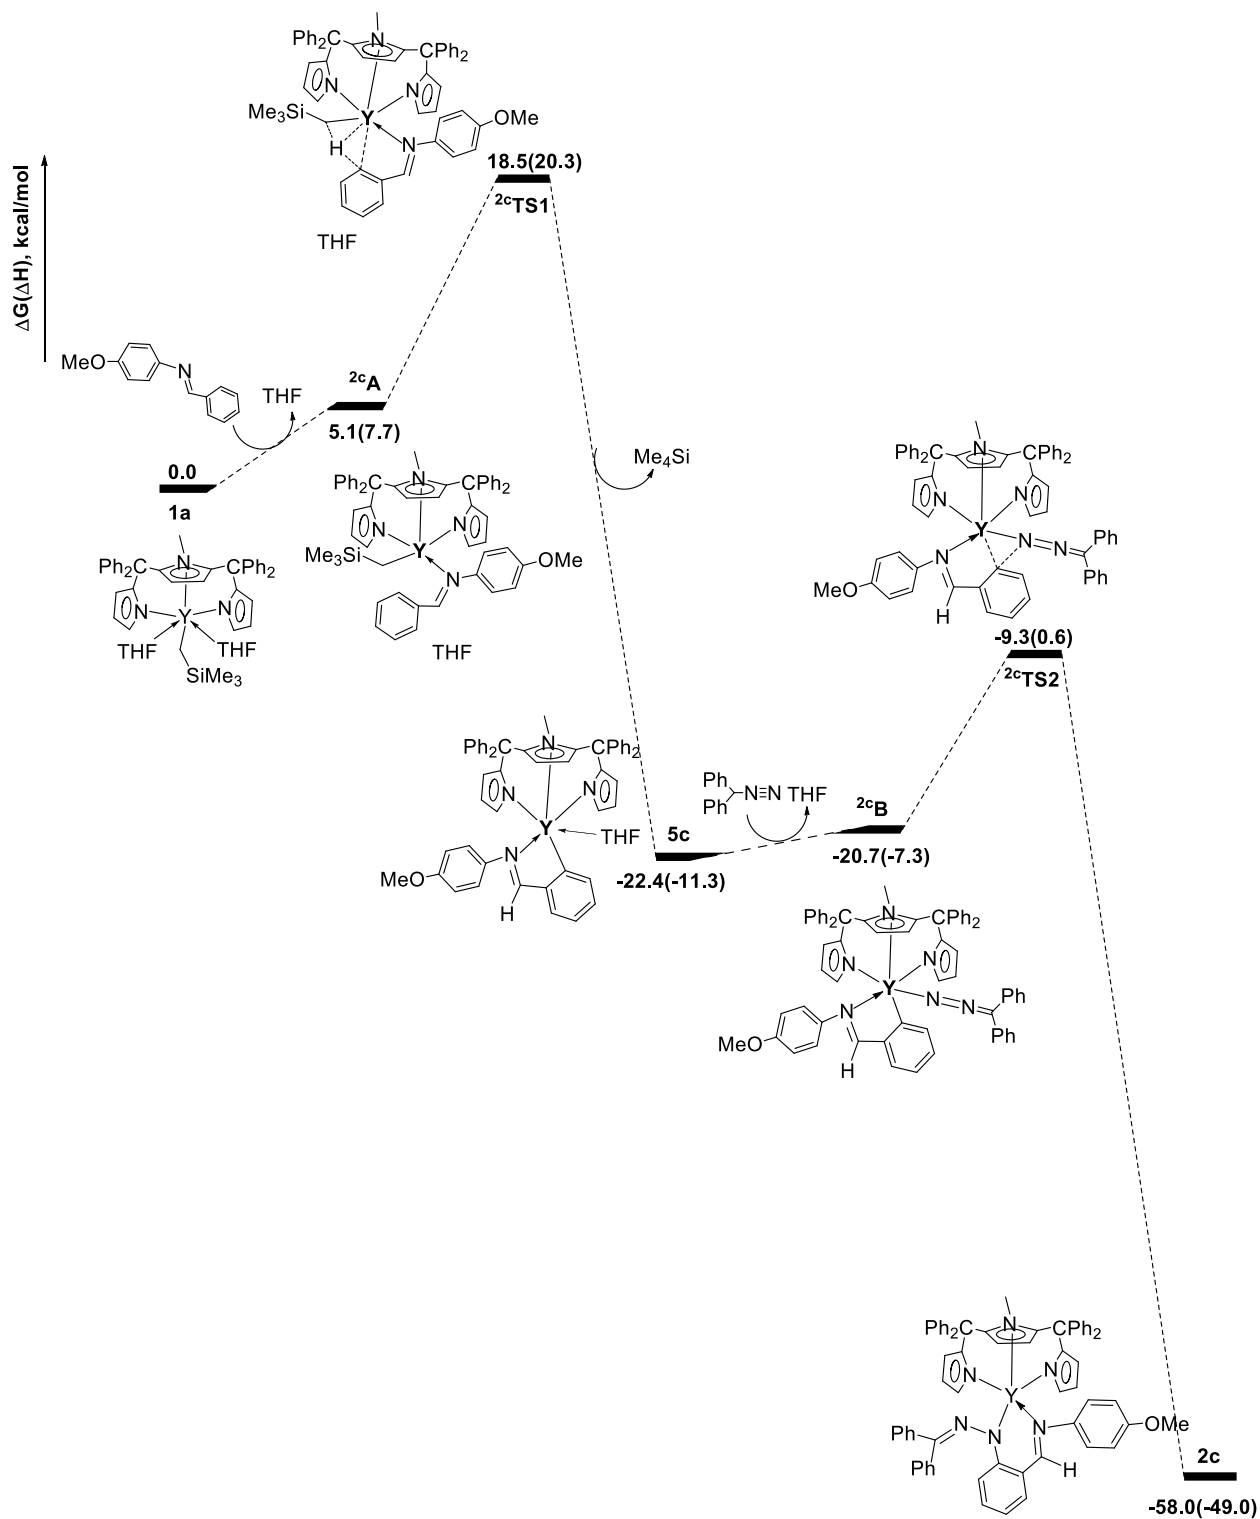

**Figure S77.** Energy (enthalpy between bracket) profiles for the formation of **2c**.

Optimized coordinates

**Ia**

Y -4.791592000 6.579289000 11.977041000  
 Si -7.571838000 4.031575000 10.502462000  
 O -4.968668000 7.105944000 9.543723000  
 O -3.188628000 4.859771000 10.930556000  
 N -6.315570000 8.350957000 12.336543000  
 N -3.494633000 8.696964000 13.609852000  
 N -4.235203000 5.747951000 14.126676000  
 C -7.599464000 8.023539000 12.718080000  
 H -7.980586000 7.023462000 12.567057000  
 C -8.242776000 9.108120000 13.279482000  
 H -9.249503000 9.130114000 13.677097000  
 C -7.316342000 10.178564000 13.246339000  
 H -7.483277000 11.174646000 13.629160000  
 C -6.156421000 9.689300000 12.657926000  
 C -4.860419000 10.400861000 12.268939000  
 C -4.576242000 11.676153000 13.098535000  
 C -5.500420000 12.731651000 13.089511000  
 H -6.414017000 12.637038000 12.512779000  
 C -5.250272000 13.914447000 13.777786000  
 H -5.989948000 14.710370000 13.758603000  
 C -4.052673000 14.088433000 14.471299000  
 H -3.855481000 15.013301000 15.006038000  
 C -3.104857000 13.070885000 14.448690000  
 H -2.154315000 13.197281000 14.960208000  
 C -3.364421000 11.882321000 13.764270000  
 H -2.598699000 11.113301000 13.738167000  
 C -4.917130000 10.913539000 10.803378000  
 C -6.113702000 10.901731000 10.082079000  
 H -7.001453000 10.484068000 10.548582000  
 C -6.182934000 11.448654000 8.798267000  
 H -7.129847000 11.440753000 8.264197000  
 C -5.053951000 12.013236000 8.210334000  
 H -5.108181000 12.442711000 7.213577000  
 C -3.857022000 12.047195000 8.928467000  
 H -2.973690000 12.509246000 8.495052000  
 C -3.795574000 11.516735000 10.214330000  
 H -2.870548000 11.594314000 10.779023000  
 C -3.754979000 9.365115000 12.416365000  
 C -2.916526000 8.824053000 11.454692000  
 H -2.874538000 9.140187000 10.424395000  
 C -2.120549000 7.827320000 12.077817000  
 H -1.336239000 7.246105000 11.621584000  
 C -2.480333000 7.763244000 13.416477000  
 C -4.162833000 8.969088000 14.884955000  
 H -3.642064000 9.763972000 15.422148000  
 H -4.159600000 8.058494000 15.483666000  
 H -5.189241000 9.276281000 14.682652000  
 C -1.993047000 6.816104000 14.505191000  
 C -1.233178000 7.559638000 15.627613000  
 C -0.979125000 8.932951000 15.586901000  
 H -1.342793000 9.523686000 14.752296000  
 C -0.244100000 9.564020000 16.592385000  
 H -0.066504000 10.634625000 16.533900000  
 C 0.262694000 8.827885000 17.657863000  
 H 0.832639000 9.316614000 18.443094000  
 C 0.047574000 7.449892000 17.694255000  
 H 0.458701000 6.854993000 18.505477000  
 C -0.678248000 6.824226000 16.686100000  
 H -0.799075000 5.746083000 16.706844000  
 C -0.955909000 5.826044000 13.909711000  
 C 0.267042000 6.295789000 13.406857000  
 H 0.470317000 7.363394000 13.407420000

C 1.238627000 5.413898000 12.939752000  
 H 2.179104000 5.802663000 12.557790000  
 C 1.019041000 4.036233000 12.992435000  
 H 1.785210000 3.345277000 12.651049000  
 C -0.182207000 3.558181000 13.510937000  
 H -0.354882000 2.487306000 13.586108000  
 C -1.165608000 4.445400000 13.956563000  
 H -2.096140000 4.070794000 14.371614000  
 C -3.227661000 6.078335000 15.016146000  
 C -3.534925000 5.608932000 16.286849000  
 H -2.953026000 5.739815000 17.187619000  
 C -4.783994000 4.949850000 16.185694000  
 H -5.334779000 4.470867000 16.985301000  
 C -5.171872000 5.055484000 14.864822000  
 H -6.075121000 4.684008000 14.401541000  
 C -6.460549000 4.841890000 11.777345000  
 H -5.902485000 4.009913000 12.241660000  
 H -7.162191000 5.147382000 12.575126000  
 C -8.165568000 2.310480000 11.079525000  
 H -7.317380000 1.637889000 11.252886000  
 H -8.822629000 1.835559000 10.341596000  
 H -8.719431000 2.388886000 12.021535000  
 C -6.715034000 3.733831000 8.817420000  
 H -6.226281000 4.637224000 8.440303000  
 H -7.438961000 3.397266000 8.066547000  
 H -5.949094000 2.953553000 8.898441000  
 C -9.156849000 5.051280000 10.205414000  
 H -9.748261000 5.088479000 11.127348000  
 H -9.779732000 4.585934000 9.433180000  
 H -8.965984000 6.085973000 9.904467000  
 C -6.283681000 7.502605000 9.053341000  
 H -6.537947000 8.445336000 9.539099000  
 H -6.995231000 6.735134000 9.358430000  
 C -6.138357000 7.641546000 7.542579000  
 H -6.379487000 6.699657000 7.037885000  
 H -6.795138000 8.418734000 7.143823000  
 C -4.654063000 7.973876000 7.378829000  
 H -4.474866000 9.033201000 7.589050000  
 H -4.264571000 7.744043000 6.383179000  
 C -4.025509000 7.106595000 8.458185000  
 H -3.876608000 6.074652000 8.114709000  
 H -3.075921000 7.498802000 8.831818000  
 C -1.884460000 4.948218000 10.322867000  
 H -1.121448000 5.031344000 11.105655000  
 H -1.863945000 5.843480000 9.699010000  
 C -1.730992000 3.651172000 9.548843000  
 H -0.686723000 3.426967000 9.315527000  
 H -2.295523000 3.694103000 8.610647000  
 C -2.359683000 2.652215000 10.522348000  
 H -2.721293000 1.743027000 10.034947000  
 H -1.627613000 2.365526000 11.282578000  
 C -3.501121000 3.453649000 11.150630000  
 H -4.459775000 3.263363000 10.666593000  
 H -3.601916000 3.288298000 12.226597000

**A**

Y -0.106046000 -0.542166000 -0.471502000  
 N -1.387351000 1.392483000 1.085866000  
 C -2.663642000 -0.415514000 0.749268000  
 H -3.146855000 -1.369744000 0.891927000  
 C -1.663977000 2.697741000 -1.124296000  
 N 0.560103000 1.569968000 -1.265017000



|   |              |              |              |            |              |              |              |
|---|--------------|--------------|--------------|------------|--------------|--------------|--------------|
| C | -1.819245000 | 0.196544000  | 1.662997000  | C          | -3.560275000 | 1.867478000  | -4.971081000 |
| C | -1.970807000 | 1.542081000  | -0.175318000 | H          | -4.036359000 | 1.665892000  | -5.926682000 |
| N | 0.804403000  | -0.642316000 | 1.677221000  | C          | -3.571989000 | 5.375153000  | 0.911362000  |
| C | -2.758183000 | 0.420861000  | -0.393280000 | H          | -4.144440000 | 5.439035000  | 1.832868000  |
| H | -3.326489000 | 0.223443000  | -1.288722000 | C          | -4.334790000 | 2.131703000  | -3.840710000 |
| O | 5.672317000  | 0.341724000  | -1.133799000 | H          | -5.419174000 | 2.141750000  | -3.912314000 |
| C | -1.841673000 | -1.785422000 | 3.173770000  | C          | 3.655100000  | -4.130402000 | 1.576550000  |
| N | 1.726833000  | -1.232682000 | -2.138418000 | H          | 3.860943000  | -4.695110000 | 2.481373000  |
| C | -1.816216000 | 0.466055000  | 4.200875000  | C          | 3.748722000  | -2.098422000 | -3.094780000 |
| C | -1.300372000 | -0.341198000 | 2.993156000  | H          | 4.640546000  | -2.700642000 | -2.964304000 |
| C | -3.202084000 | -1.994413000 | 3.443115000  | C          | 4.422582000  | -2.703967000 | -0.218261000 |
| H | -3.868059000 | -1.139998000 | 3.530175000  | H          | 5.206433000  | -2.113918000 | -0.685216000 |
| C | -2.325860000 | 2.389715000  | -2.494902000 | C          | -2.857924000 | -4.383137000 | 3.547159000  |
| C | -0.146004000 | 2.758057000  | -1.241738000 | H          | -3.248409000 | -5.386403000 | 3.694045000  |
| C | 0.219649000  | -0.313012000 | 2.887614000  | C          | -3.404721000 | 6.500648000  | 0.111768000  |
| C | -2.267472000 | 4.033394000  | -0.643401000 | H          | -3.839529000 | 7.452333000  | 0.404176000  |
| C | -2.702331000 | 1.539365000  | 4.076334000  | C          | -1.503073000 | -4.184685000 | 3.297195000  |
| H | -3.039940000 | 1.849525000  | 3.091767000  | H          | -0.829687000 | -5.036721000 | 3.252470000  |
| C | -0.449232000 | 2.337333000  | 1.705476000  | C          | 2.280739000  | -0.773343000 | -4.438031000 |
| H | 0.582387000  | 2.038178000  | 1.509188000  | H          | 2.001257000  | -0.291639000 | -5.368617000 |
| H | -0.622228000 | 2.353148000  | 2.779441000  | C          | 5.657696000  | 1.111558000  | 0.077684000  |
| H | -0.622811000 | 3.327321000  | 1.291675000  | H          | 5.908003000  | 0.456388000  | 0.920119000  |
| C | -1.454201000 | 0.058605000  | 5.493773000  | H          | 4.643064000  | 1.497959000  | 0.236104000  |
| H | -0.811138000 | -0.807278000 | 5.616321000  | C          | 4.679380000  | -3.424820000 | 0.944073000  |
| C | 2.026065000  | 3.293596000  | -1.453516000 | H          | 5.681818000  | -3.429984000 | 1.362967000  |
| H | 2.951858000  | 3.847511000  | -1.546353000 | C          | 3.462426000  | -1.498643000 | -4.311863000 |
| C | 2.098811000  | -3.372472000 | -0.106655000 | H          | 4.141488000  | -1.608029000 | -5.152698000 |
| C | 1.887282000  | 1.919587000  | -1.395218000 | C          | 6.512877000  | 0.972981000  | -2.096382000 |
| H | 2.664402000  | 1.166319000  | -1.430197000 | H          | 6.044300000  | 0.874994000  | -3.081307000 |
| C | 1.194992000  | 0.027360000  | 3.811540000  | H          | 7.492615000  | 0.468912000  | -2.131333000 |
| H | 1.038786000  | 0.353050000  | 4.830122000  | C          | 6.665932000  | 2.418322000  | -1.634649000 |
| C | 3.126133000  | -2.674447000 | -0.754287000 | H          | 7.570316000  | 2.896428000  | -2.021622000 |
| C | -1.559721000 | 2.141317000  | -3.636509000 | H          | 5.801251000  | 3.011493000  | -1.951962000 |
| H | -0.477410000 | 2.174003000  | -3.561070000 | C          | 6.667785000  | 2.244951000  | -0.113807000 |
| C | 2.442810000  | -0.095488000 | 3.150674000  | H          | 6.386704000  | 3.151267000  | 0.429119000  |
| H | 3.422564000  | 0.090992000  | 3.572045000  | H          | 7.662621000  | 1.939653000  | 0.230479000  |
| C | 2.857174000  | -1.963350000 | -2.022014000 | C          | -1.343626000 | -2.165317000 | -1.800835000 |
| C | 0.720026000  | 3.834635000  | -1.355219000 | H          | 1.098319000  | -3.374556000 | -0.534561000 |
| H | 0.457722000  | 4.883072000  | -1.347706000 | H          | -2.367168000 | -2.103330000 | -1.392428000 |
| C | 2.162141000  | -0.502119000 | 1.860616000  | Si         | -1.264656000 | -3.944078000 | -2.392394000 |
| H | 2.856783000  | -0.720169000 | 1.059492000  | C          | -1.386060000 | -5.162686000 | -0.931542000 |
| C | -3.708137000 | -3.279069000 | 3.619735000  | H          | -0.529450000 | -5.083614000 | -0.254543000 |
| H | -4.766002000 | -3.416805000 | 3.827676000  | H          | -2.288825000 | -4.968305000 | -0.342137000 |
| C | -0.997813000 | -2.896409000 | 3.108307000  | H          | -1.434783000 | -6.198151000 | -1.286834000 |
| H | 0.059196000  | -2.745682000 | 2.915195000  | C          | -2.735693000 | -4.339764000 | -3.546434000 |
| C | -3.011064000 | 4.153311000  | 0.533575000  | H          | -2.718997000 | -5.381211000 | -3.888573000 |
| H | -3.169240000 | 3.283990000  | 1.164442000  | H          | -3.689882000 | -4.170890000 | -3.034381000 |
| C | -1.923126000 | 0.733444000  | 6.615759000  | H          | -2.719796000 | -3.695424000 | -4.432987000 |
| H | -1.622537000 | 0.400451000  | 7.605579000  | C          | 0.307691000  | -4.353661000 | -3.390007000 |
| C | 2.365627000  | -4.100840000 | 1.050147000  | H          | 1.212973000  | -4.313999000 | -2.776902000 |
| H | 1.563549000  | -4.647814000 | 1.536214000  | H          | 0.238292000  | -5.362522000 | -3.812323000 |
| C | 1.456014000  | -0.666072000 | -3.327917000 | H          | 0.434206000  | -3.653521000 | -4.223327000 |
| H | 0.544237000  | -0.079650000 | -3.383592000 | H          | -1.397796000 | -1.562481000 | -2.732761000 |
| C | -2.785984000 | 1.821394000  | 6.475393000  |            |              |              |              |
| H | -3.155795000 | 2.345867000  | 7.352007000  |            |              |              |              |
| C | -2.134568000 | 5.169560000  | -1.456078000 | <b>TS1</b> |              |              |              |
| H | -1.606711000 | 5.087696000  | -2.401090000 | Y          | 7.985284000  | 3.644113000  | 12.601576000 |
| C | -3.722618000 | 2.399248000  | -2.619533000 | N          | 6.523984000  | 5.644817000  | 14.132354000 |
| H | -4.335385000 | 2.631862000  | -1.752596000 | C          | 5.472768000  | 3.679677000  | 13.941328000 |
| C | -3.180573000 | 2.215070000  | 5.201273000  | H          | 5.080215000  | 2.700998000  | 14.173217000 |
| H | -3.867648000 | 3.047404000  | 5.074093000  | C          | 6.138136000  | 6.733404000  | 11.834460000 |
| C | -2.172445000 | 1.883077000  | -4.864975000 | N          | 8.471574000  | 5.821358000  | 11.846708000 |
| H | -1.557773000 | 1.702594000  | -5.743246000 | C          | 6.234466000  | 4.459934000  | 14.800489000 |
| C | -2.685816000 | 6.389518000  | -1.079179000 | C          | 5.936032000  | 5.630161000  | 12.868456000 |
| H | -2.563336000 | 7.255013000  | -1.724844000 | N          | 8.867873000  | 3.757673000  | 14.752304000 |
|   |              |              |              | C          | 5.281582000  | 4.413192000  | 12.738016000 |

|   |              |              |              |          |              |              |              |
|---|--------------|--------------|--------------|----------|--------------|--------------|--------------|
| H | 4.720704000  | 4.097705000  | 11.872058000 | C        | 3.564264000  | 5.692176000  | 9.166138000  |
| O | 13.150391000 | 5.046328000  | 12.034968000 | H        | 2.487829000  | 5.557955000  | 9.099766000  |
| C | 6.363263000  | 2.658168000  | 16.524542000 | C        | 9.875799000  | -0.448357000 | 14.193290000 |
| N | 9.666150000  | 3.183992000  | 10.755094000 | H        | 9.693680000  | -1.123785000 | 15.025605000 |
| C | 6.317790000  | 4.991248000  | 17.301776000 | C        | 11.475885000 | 1.880487000  | 9.880604000  |
| C | 6.828481000  | 4.092835000  | 16.154498000 | H        | 12.138222000 | 1.028827000  | 9.983237000  |
| C | 5.006449000  | 2.403470000  | 16.773729000 | C        | 11.362807000 | 0.438647000  | 12.514405000 |
| H | 4.286377000  | 3.213858000  | 16.695436000 | H        | 12.350584000 | 0.472502000  | 12.061945000 |
| C | 5.521856000  | 6.270139000  | 10.488182000 | C        | 5.490986000  | 0.093283000  | 17.287044000 |
| C | 7.647704000  | 6.928965000  | 11.737979000 | H        | 5.155840000  | -0.896487000 | 17.585053000 |
| C | 8.342709000  | 4.157921000  | 15.965800000 | C        | 4.008214000  | 10.422314000 | 12.771353000 |
| C | 5.400838000  | 8.035533000  | 12.210525000 | H        | 3.475280000  | 11.343643000 | 12.988987000 |
| C | 5.350829000  | 5.984283000  | 17.119066000 | C        | 6.842141000  | 0.341802000  | 17.063447000 |
| H | 4.952756000  | 6.175119000  | 16.127090000 | H        | 7.570432000  | -0.454950000 | 17.191170000 |
| C | 7.384033000  | 6.714564000  | 14.651516000 | C        | 10.643747000 | 3.748351000  | 8.633568000  |
| H | 8.393331000  | 6.619101000  | 14.246685000 | H        | 10.649590000 | 4.405362000  | 7.770624000  |
| H | 7.421316000  | 6.641233000  | 15.734499000 | C        | 13.578671000 | 5.228510000  | 13.389904000 |
| H | 6.966121000  | 7.678074000  | 14.364935000 | H        | 14.048119000 | 4.301503000  | 13.739942000 |
| C | 6.761365000  | 4.741938000  | 18.609407000 | H        | 12.700005000 | 5.425557000  | 14.018234000 |
| H | 7.461897000  | 3.932699000  | 18.787756000 | C        | 11.134708000 | -0.412499000 | 13.589367000 |
| C | 9.766966000  | 7.673926000  | 11.645199000 | H        | 11.936402000 | -1.047342000 | 13.956695000 |
| H | 10.636296000 | 8.316335000  | 11.581790000 | C        | 11.541774000 | 2.690480000  | 8.757456000  |
| C | 9.066198000  | 1.279672000  | 12.668546000 | H        | 12.275682000 | 2.491627000  | 7.981436000  |
| C | 9.763319000  | 6.299169000  | 11.793557000 | C        | 13.597059000 | 6.139786000  | 11.234872000 |
| H | 10.613942000 | 5.632052000  | 11.876828000 | H        | 12.782940000 | 6.434396000  | 10.564107000 |
| C | 9.369078000  | 4.478941000  | 16.842808000 | H        | 14.453786000 | 5.823248000  | 10.618383000 |
| H | 9.271192000  | 4.839229000  | 17.856882000 | C        | 14.006318000 | 7.240419000  | 12.209997000 |
| C | 10.332202000 | 1.269098000  | 12.046112000 | H        | 14.742029000 | 7.931208000  | 11.788175000 |
| C | 6.311750000  | 6.076973000  | 9.353146000  | H        | 13.129228000 | 7.819343000  | 12.519458000 |
| H | 7.378077000  | 6.266416000  | 9.421483000  | C        | 14.539208000 | 6.417832000  | 13.385238000 |
| C | 10.584410000 | 4.257718000  | 16.146714000 | H        | 14.539654000 | 6.961249000  | 14.334149000 |
| H | 11.586956000 | 4.402749000  | 16.529172000 | H        | 15.564596000 | 6.086699000  | 13.183267000 |
| C | 10.518755000 | 2.139341000  | 10.871739000 | C        | 6.696651000  | 1.889897000  | 11.169932000 |
| C | 8.409507000  | 8.079787000  | 11.609759000 | H        | 7.944043000  | 1.587308000  | 11.918844000 |
| H | 8.045122000  | 9.094454000  | 11.534535000 | H        | 5.805284000  | 1.869101000  | 11.814149000 |
| C | 10.234804000 | 3.815939000  | 14.883816000 | Si       | 6.556919000  | 0.331183000  | 10.106955000 |
| H | 10.883894000 | 3.528804000  | 14.063965000 | C        | 6.426848000  | -1.200227000 | 11.221574000 |
| C | 4.571547000  | 1.133237000  | 17.140297000 | H        | 7.321996000  | -1.312690000 | 11.841027000 |
| H | 3.515103000  | 0.958997000  | 17.327089000 | H        | 5.561772000  | -1.126356000 | 11.890049000 |
| C | 7.276316000  | 1.613601000  | 16.680536000 | H        | 6.309747000  | -2.111588000 | 10.625150000 |
| H | 8.330870000  | 1.802483000  | 16.508037000 | C        | 4.988578000  | 0.425981000  | 9.032147000  |
| C | 4.607232000  | 8.154327000  | 13.354656000 | H        | 4.875092000  | -0.469079000 | 8.409938000  |
| H | 4.508447000  | 7.312167000  | 14.033157000 | H        | 4.091515000  | 0.516784000  | 9.654486000  |
| C | 6.295388000  | 5.494847000  | 19.681988000 | H        | 5.021042000  | 1.295862000  | 8.367083000  |
| H | 6.661560000  | 5.283582000  | 20.683110000 | C        | 8.051143000  | 0.138783000  | 8.952053000  |
| C | 8.861837000  | 0.388465000  | 13.731229000 | H        | 8.969465000  | -0.028603000 | 9.522749000  |
| H | 7.889042000  | 0.349518000  | 14.217149000 | H        | 7.913550000  | -0.713691000 | 8.277819000  |
| C | 9.732547000  | 3.956525000  | 9.659373000  | H        | 8.193037000  | 1.033441000  | 8.336350000  |
| H | 9.035170000  | 4.785448000  | 9.629912000  | H        | 6.570180000  | 2.736776000  | 10.471580000 |
| C | 5.351884000  | 6.502678000  | 19.479882000 |          |              |              |              |
| H | 4.984308000  | 7.087850000  | 20.318174000 | <b>2</b> |              |              |              |
| C | 5.453061000  | 9.126551000  | 11.330039000 | Y        | 8.773589000  | 3.798808000  | 13.313824000 |
| H | 6.018400000  | 9.038597000  | 10.407473000 | N        | 6.523613000  | 5.177756000  | 14.361361000 |
| C | 4.135339000  | 6.092137000  | 10.370680000 | C        | 6.122719000  | 3.055946000  | 13.772657000 |
| H | 3.496535000  | 6.284763000  | 11.228543000 | H        | 5.986995000  | 1.987247000  | 13.812410000 |
| C | 4.874565000  | 6.736431000  | 18.194671000 | C        | 6.419759000  | 6.430781000  | 12.117629000 |
| H | 4.125000000  | 7.503823000  | 18.020543000 | N        | 8.837187000  | 6.100345000  | 12.689793000 |
| C | 5.740275000  | 5.685438000  | 8.140133000  | C        | 6.411105000  | 3.875527000  | 14.854738000 |
| H | 6.374015000  | 5.549401000  | 7.267530000  | C        | 6.292304000  | 5.183173000  | 12.987462000 |
| C | 4.775485000  | 10.308161000 | 11.611283000 | N        | 9.037437000  | 4.042772000  | 15.656746000 |
| H | 4.837518000  | 11.140023000 | 10.914772000 | C        | 6.058206000  | 3.867429000  | 12.608160000 |
| C | 4.366896000  | 5.481195000  | 8.043755000  | H        | 5.859003000  | 3.529966000  | 11.602555000 |
| H | 3.921188000  | 5.176678000  | 7.100863000  | O        | 11.135508000 | 3.193756000  | 13.617844000 |
| C | 3.920152000  | 9.337043000  | 13.636560000 | C        | 6.675607000  | 1.962042000  | 16.456706000 |
| H | 3.311840000  | 9.401553000  | 14.534772000 | N        | 9.679841000  | 3.586793000  | 10.910710000 |

|   |              |              |              |
|---|--------------|--------------|--------------|
| C | 5.586466000  | 4.020688000  | 17.262803000 |
| C | 6.686989000  | 3.507158000  | 16.310634000 |
| C | 5.487649000  | 1.242781000  | 16.259609000 |
| H | 4.578519000  | 1.773816000  | 15.990297000 |
| C | 6.210321000  | 6.023919000  | 10.635216000 |
| C | 7.822599000  | 6.981737000  | 12.380458000 |
| C | 8.060089000  | 4.086536000  | 16.633327000 |
| C | 5.314062000  | 7.472682000  | 12.407484000 |
| C | 4.439441000  | 4.677952000  | 16.809460000 |
| H | 4.309972000  | 4.866058000  | 15.747742000 |
| C | 6.874920000  | 6.353884000  | 15.166324000 |
| H | 7.948091000  | 6.370910000  | 15.363358000 |
| H | 6.331931000  | 6.315151000  | 16.109363000 |
| H | 6.596605000  | 7.250422000  | 14.620005000 |
| C | 5.683534000  | 3.739728000  | 18.633977000 |
| H | 6.536392000  | 3.178432000  | 19.002222000 |
| C | 9.681295000  | 8.210005000  | 12.708517000 |
| H | 10.370574000 | 9.037659000  | 12.819964000 |
| C | 8.644471000  | 1.508949000  | 12.428275000 |
| C | 9.960430000  | 6.866379000  | 12.889707000 |
| H | 10.898511000 | 6.411536000  | 13.190287000 |
| C | 8.549908000  | 4.698553000  | 17.777696000 |
| H | 8.008976000  | 4.897773000  | 18.691800000 |
| C | 9.109901000  | 1.240122000  | 11.115284000 |
| C | 7.208730000  | 6.209737000  | 9.679352000  |
| H | 8.157045000  | 6.634846000  | 9.989487000  |
| C | 9.893994000  | 5.054016000  | 17.503679000 |
| H | 10.581444000 | 5.561602000  | 18.168781000 |
| C | 9.651326000  | 2.365226000  | 10.319026000 |
| C | 8.305134000  | 8.285711000  | 12.385503000 |
| H | 7.740461000  | 9.190303000  | 12.210919000 |
| C | 10.147528000 | 4.640874000  | 16.209192000 |
| H | 11.056279000 | 4.753028000  | 15.630571000 |
| C | 5.450485000  | -0.138482000 | 16.426944000 |
| H | 4.518960000  | -0.674789000 | 16.266156000 |
| C | 7.816976000  | 1.261995000  | 16.856073000 |
| H | 8.735945000  | 1.811129000  | 17.033119000 |
| C | 4.303848000  | 7.273790000  | 13.352443000 |
| H | 4.288726000  | 6.364663000  | 13.944963000 |
| C | 4.694124000  | 4.148508000  | 19.521890000 |
| H | 4.797792000  | 3.922835000  | 20.579886000 |
| C | 8.184617000  | 0.389716000  | 13.148686000 |
| H | 7.821551000  | 0.519502000  | 14.168379000 |
| C | 10.196839000 | 4.629137000  | 10.242346000 |
| H | 10.181994000 | 5.575747000  | 10.775544000 |
| C | 3.567651000  | 4.829595000  | 19.058690000 |
| H | 2.792722000  | 5.145123000  | 19.751673000 |
| C | 5.260445000  | 8.638334000  | 11.627865000 |
| H | 5.995115000  | 8.787414000  | 10.843053000 |
| C | 4.969324000  | 5.523363000  | 10.213120000 |
| H | 4.163068000  | 5.413950000  | 10.933566000 |
| C | 3.440540000  | 5.083396000  | 17.697227000 |
| H | 2.560433000  | 5.594277000  | 17.315822000 |
| C | 6.987387000  | 5.879942000  | 8.340365000  |
| H | 7.779735000  | 6.035934000  | 7.613142000  |
| C | 4.265800000  | 9.590126000  | 11.824481000 |
| H | 4.253362000  | 10.486193000 | 11.209719000 |
| C | 5.762244000  | 5.358033000  | 7.937081000  |
| H | 5.589706000  | 5.101228000  | 6.895408000  |
| C | 3.298548000  | 8.223223000  | 13.546941000 |
| H | 2.528284000  | 8.041179000  | 14.291646000 |
| C | 4.749528000  | 5.183694000  | 8.881942000  |
| H | 3.780921000  | 4.794764000  | 8.578933000  |
| C | 8.168582000  | -0.906067000 | 12.627656000 |
| H | 7.804085000  | -1.735178000 | 13.230665000 |

|   |              |              |              |
|---|--------------|--------------|--------------|
| C | 10.146771000 | 2.213510000  | 9.011122000  |
| H | 10.114441000 | 1.245497000  | 8.526963000  |
| C | 9.086071000  | -0.059431000 | 10.574655000 |
| H | 9.433409000  | -0.259473000 | 9.564552000  |
| C | 6.598488000  | -0.829025000 | 16.818779000 |
| H | 6.567901000  | -1.905742000 | 16.962170000 |
| C | 3.279787000  | 9.390494000  | 12.791386000 |
| H | 2.499546000  | 10.131262000 | 12.942307000 |
| C | 7.777273000  | -0.122186000 | 17.039371000 |
| H | 8.674857000  | -0.645477000 | 17.358776000 |
| C | 10.721614000 | 4.538444000  | 8.960197000  |
| H | 11.132841000 | 5.417149000  | 8.474746000  |
| C | 11.434585000 | 2.044571000  | 14.467190000 |
| H | 10.683704000 | 1.277001000  | 14.264923000 |
| H | 11.347925000 | 2.381836000  | 15.503840000 |
| C | 8.616426000  | -1.129616000 | 11.326461000 |
| H | 8.602417000  | -2.129042000 | 10.899305000 |
| C | 10.684588000 | 3.295912000  | 8.332338000  |
| H | 11.069890000 | 3.169723000  | 7.323876000  |
| C | 12.305799000 | 3.552310000  | 12.850597000 |
| H | 12.343545000 | 4.642277000  | 12.782513000 |
| H | 12.211291000 | 3.135155000  | 11.841759000 |
| C | 13.471124000 | 2.933517000  | 13.604523000 |
| H | 14.345859000 | 2.787157000  | 12.965277000 |
| H | 13.762649000 | 3.567406000  | 14.449089000 |
| C | 12.852634000 | 1.623858000  | 14.098781000 |
| H | 13.382735000 | 1.190370000  | 14.950737000 |
| H | 12.838270000 | 0.882471000  | 13.292641000 |

**B**

|   |              |              |              |
|---|--------------|--------------|--------------|
| Y | -0.225498000 | -0.305145000 | -0.043947000 |
| N | -0.433252000 | 0.758772000  | 2.595934000  |
| N | -0.678441000 | 2.018910000  | -0.246890000 |
| N | -2.175412000 | -1.082826000 | 0.961801000  |
| C | 0.712025000  | 1.358104000  | 2.073306000  |
| C | 1.660078000  | 0.353268000  | 1.921172000  |
| H | 2.663834000  | 0.491512000  | 1.551962000  |
| N | -0.850414000 | -0.127234000 | -2.391655000 |
| C | 1.084511000  | -0.870174000 | 2.361184000  |
| H | 1.559128000  | -1.840114000 | 2.383457000  |
| C | -0.668555000 | -3.012332000 | 3.181678000  |
| N | -0.751635000 | -0.031748000 | -3.541874000 |
| C | -1.284267000 | -1.588428000 | 3.245649000  |
| C | -2.451472000 | -1.424606000 | 2.269856000  |
| C | -0.372930000 | 3.026652000  | 0.652713000  |
| C | -0.210558000 | -0.603377000 | 2.789538000  |
| C | 0.770827000  | 2.822438000  | 1.645605000  |
| C | -1.709129000 | -1.361928000 | 4.710124000  |
| C | 2.142990000  | 3.112289000  | 0.980428000  |
| N | 2.027380000  | -0.754472000 | -1.168375000 |
| C | -3.823580000 | -1.566382000 | 2.441039000  |
| H | -4.346657000 | -1.799974000 | 3.356997000  |
| C | -0.929829000 | 1.392093000  | -5.423215000 |
| C | -0.649726000 | 0.066507000  | -4.828350000 |
| C | -1.707450000 | 2.507691000  | -1.020691000 |
| H | -2.162239000 | 1.897596000  | -1.790091000 |
| C | -4.420621000 | -1.309032000 | 1.181847000  |
| H | -5.478105000 | -1.320453000 | 0.950051000  |
| C | -1.035051000 | -3.921627000 | 2.188525000  |
| H | -1.767556000 | -3.628376000 | 1.445149000  |
| C | -2.655007000 | -2.224778000 | 5.283957000  |
| H | -3.069800000 | -3.030536000 | 4.686996000  |
| C | -3.384954000 | -1.019252000 | 0.312639000  |
| H | -3.436314000 | -0.753677000 | -0.737609000 |
| C | -0.179895000 | -2.434569000 | -1.301788000 |

|   |              |              |              |
|---|--------------|--------------|--------------|
| C | -0.269487000 | -1.145660000 | -5.585432000 |
| C | 2.225645000  | 3.577435000  | -0.335367000 |
| H | 1.312639000  | 3.694897000  | -0.910181000 |
| C | -1.245235000 | -3.348860000 | -1.365658000 |
| H | -2.234550000 | -3.033791000 | -1.036856000 |
| C | -1.200357000 | 4.122973000  | 0.441566000  |
| H | -1.214294000 | 5.045267000  | 1.004068000  |
| C | 0.701396000  | 3.780532000  | 2.855282000  |
| C | 1.076745000  | -2.899314000 | -1.756385000 |
| C | -1.676944000 | 1.459321000  | 2.928909000  |
| H | -1.821164000 | 2.275976000  | 2.221573000  |
| H | -1.620079000 | 1.859560000  | 3.942772000  |
| H | -2.504373000 | 0.753759000  | 2.856223000  |
| C | -2.056238000 | 3.787325000  | -0.635018000 |
| H | -2.841211000 | 4.400545000  | -1.058893000 |
| C | 0.277447000  | -3.410239000 | 4.137966000  |
| H | 0.557107000  | -2.724525000 | 4.933338000  |
| C | -1.509771000 | -0.252748000 | 6.867509000  |
| H | -1.039691000 | 0.510757000  | 7.481746000  |
| C | -1.126282000 | -0.394324000 | 5.532179000  |
| H | -0.346184000 | 0.250288000  | 5.138939000  |
| C | -1.446006000 | 1.488950000  | -6.725453000 |
| H | -1.633074000 | 0.586107000  | -7.298066000 |
| C | 2.196387000  | -1.936997000 | -1.811831000 |
| C | -2.480520000 | -1.087726000 | 7.410144000  |
| H | -2.782661000 | -0.978360000 | 8.447951000  |
| C | 0.766616000  | 5.165442000  | 2.640999000  |
| H | 0.849503000  | 5.544548000  | 1.627679000  |
| C | 0.688383000  | 3.325336000  | 4.176594000  |
| H | 0.699336000  | 2.258984000  | 4.381019000  |
| C | -0.464546000 | -5.195412000 | 2.144348000  |
| H | -0.761663000 | -5.883624000 | 1.358205000  |
| C | 0.684928000  | 4.218578000  | 5.249629000  |
| H | 0.671455000  | 3.834105000  | 6.265995000  |
| C | 1.259546000  | -4.231232000 | -2.171194000 |
| H | 2.240580000  | -4.599500000 | -2.460626000 |
| C | 4.374347000  | -1.218589000 | -2.588709000 |
| H | 5.284394000  | -1.408173000 | -3.151481000 |
| C | -3.045729000 | -2.082299000 | 6.611087000  |
| H | -3.785744000 | -2.760813000 | 7.026986000  |
| C | 0.755059000  | 6.058869000  | 3.707095000  |
| H | 0.798931000  | 7.126765000  | 3.510624000  |
| C | 0.480452000  | -5.578251000 | 3.091730000  |
| H | 0.921747000  | -6.570804000 | 3.057733000  |
| C | 2.993252000  | 0.174011000  | -1.240019000 |
| H | 2.799365000  | 1.110583000  | -0.725380000 |
| C | 3.329348000  | 2.992623000  | 1.720208000  |
| H | 3.282617000  | 2.677532000  | 2.759176000  |
| C | 0.483421000  | -1.033423000 | -6.765682000 |
| H | 0.781967000  | -0.052102000 | -7.121030000 |
| C | -1.081538000 | -4.661789000 | -1.813064000 |
| H | -1.932272000 | -5.339834000 | -1.845063000 |
| C | 0.705451000  | 5.590148000  | 5.020164000  |
| H | 0.700034000  | 6.287526000  | 5.853119000  |
| C | 4.183637000  | -0.005570000 | -1.930660000 |
| H | 4.923241000  | 0.786809000  | -1.950457000 |
| C | 3.377017000  | -2.180165000 | -2.533604000 |
| H | 3.495277000  | -3.111890000 | -3.073250000 |
| C | -0.619891000 | -2.424229000 | -5.125140000 |
| H | -1.191171000 | -2.535308000 | -4.207836000 |
| C | 3.461709000  | 3.898956000  | -0.902800000 |
| H | 3.500648000  | 4.268697000  | -1.924174000 |
| C | -1.734632000 | 2.733135000  | -7.278634000 |
| H | -2.135203000 | 2.788214000  | -8.287215000 |
| C | -0.232886000 | -3.557908000 | -5.833103000 |

|   |              |              |              |
|---|--------------|--------------|--------------|
| H | -0.510921000 | -4.537525000 | -5.456082000 |
| C | 0.850354000  | -4.678013000 | 4.092154000  |
| H | 1.578851000  | -4.966660000 | 4.845521000  |
| C | 4.634680000  | 3.752217000  | -0.166943000 |
| H | 5.595399000  | 4.006640000  | -0.606644000 |
| C | -0.729185000 | 2.571212000  | -4.687584000 |
| H | -0.347096000 | 2.521267000  | -3.671674000 |
| C | 0.500324000  | -3.438486000 | -7.013001000 |
| H | 0.793437000  | -4.325238000 | -7.567967000 |
| C | 0.183326000  | -5.110050000 | -2.198898000 |
| H | 0.330966000  | -6.138688000 | -2.517789000 |
| C | 4.562714000  | 3.296118000  | 1.150912000  |
| H | 5.468108000  | 3.194441000  | 1.743466000  |
| C | 0.857150000  | -2.171588000 | -7.474029000 |
| H | 1.437836000  | -2.066169000 | -8.386500000 |
| C | -1.528418000 | 3.899286000  | -6.542834000 |
| H | -1.758785000 | 4.868288000  | -6.976233000 |
| C | -1.031512000 | 3.810363000  | -5.242971000 |
| H | -0.875390000 | 4.709364000  | -4.653473000 |

**TS2**

|   |              |             |              |
|---|--------------|-------------|--------------|
| Y | 7.354196000  | 3.887387000 | 4.606530000  |
| N | 7.010278000  | 4.902028000 | 7.237231000  |
| N | 6.926806000  | 6.165465000 | 4.391425000  |
| N | 5.382806000  | 3.049483000 | 5.511656000  |
| C | 8.174488000  | 5.523799000 | 6.783965000  |
| C | 9.146319000  | 4.535771000 | 6.685994000  |
| H | 10.167398000 | 4.693532000 | 6.377220000  |
| N | 6.998686000  | 3.500612000 | 2.410723000  |
| C | 8.568003000  | 3.301338000 | 7.088227000  |
| H | 9.058650000  | 2.340502000 | 7.136947000  |
| C | 6.803097000  | 1.125271000 | 7.803726000  |
| N | 6.958434000  | 3.317314000 | 1.213783000  |
| C | 6.165966000  | 2.540266000 | 7.836406000  |
| C | 5.048698000  | 2.690648000 | 6.802376000  |
| C | 7.145155000  | 7.177986000 | 5.311025000  |
| C | 7.246424000  | 3.543758000 | 7.442194000  |
| C | 8.235922000  | 6.991047000 | 6.363231000  |
| C | 5.661598000  | 2.754058000 | 9.278155000  |
| C | 9.639198000  | 7.291963000 | 5.770544000  |
| N | 9.679896000  | 3.378011000 | 3.664690000  |
| C | 3.672305000  | 2.529753000 | 6.905766000  |
| H | 3.109361000  | 2.281013000 | 7.793664000  |
| C | 6.576685000  | 5.118594000 | -0.356208000 |
| C | 6.823207000  | 3.693841000 | -0.016295000 |
| C | 5.919748000  | 6.610644000 | 3.564139000  |
| H | 5.561326000  | 5.993790000 | 2.750618000  |
| C | 3.132379000  | 2.794367000 | 5.622338000  |
| H | 2.087153000  | 2.775120000 | 5.340963000  |
| C | 6.474479000  | 0.198736000 | 6.813177000  |
| H | 5.759928000  | 0.474697000 | 6.045455000  |
| C | 4.704061000  | 1.871884000 | 9.800963000  |
| H | 4.335611000  | 1.059999000 | 9.182231000  |
| C | 4.203504000  | 3.107497000 | 4.806642000  |
| H | 4.198546000  | 3.392463000 | 3.760491000  |
| C | 7.419097000  | 1.737588000 | 3.225544000  |
| C | 6.933457000  | 2.648158000 | -1.060593000 |
| C | 9.791184000  | 7.723960000 | 4.449623000  |
| H | 8.911399000  | 7.814258000 | 3.820813000  |
| C | 6.345178000  | 0.845093000 | 3.183263000  |
| H | 5.331448000  | 1.221385000 | 3.296366000  |
| C | 6.285332000  | 8.238605000 | 5.059488000  |
| H | 6.204269000  | 9.157540000 | 5.622175000  |
| C | 8.086018000  | 7.946710000 | 7.565262000  |
| C | 8.728487000  | 1.247202000 | 3.060375000  |

|   |              |              |              |
|---|--------------|--------------|--------------|
| C | 5.741138000  | 5.584214000  | 7.507610000  |
| H | 5.613592000  | 6.389412000  | 6.783759000  |
| H | 5.748565000  | 5.999547000  | 8.516994000  |
| H | 4.929646000  | 4.863724000  | 7.409658000  |
| C | 5.500048000  | 7.871718000  | 3.937604000  |
| H | 4.720410000  | 8.458835000  | 3.469687000  |
| C | 7.720608000  | 0.747982000  | 8.795589000  |
| H | 7.967710000  | 1.446877000  | 9.590271000  |
| C | 5.728297000  | 3.861263000  | 11.444506000 |
| H | 6.151099000  | 4.632238000  | 12.083235000 |
| C | 6.182594000  | 3.730725000  | 10.130472000 |
| H | 6.968518000  | 4.392090000  | 9.778971000  |
| C | 5.710707000  | 5.467063000  | -1.406336000 |
| H | 5.219724000  | 4.683102000  | -1.975285000 |
| C | 9.857887000  | 2.193711000  | 3.034438000  |
| C | 4.747243000  | 3.006423000  | 11.935123000 |
| H | 4.390053000  | 3.107299000  | 12.956140000 |
| C | 8.125738000  | 9.332265000  | 7.350161000  |
| H | 8.244676000  | 9.711381000  | 6.340339000  |
| C | 8.019612000  | 7.491957000  | 8.885043000  |
| H | 8.046340000  | 6.426014000  | 9.091245000  |
| C | 7.052947000  | -1.072427000 | 6.808555000  |
| H | 6.781210000  | -1.777603000 | 6.028373000  |
| C | 7.941897000  | 8.386025000  | 9.954578000  |
| H | 7.888127000  | 8.002838000  | 10.970095000 |
| C | 8.938309000  | -0.133360000 | 2.901628000  |
| H | 9.948350000  | -0.527694000 | 2.822170000  |
| C | 12.066710000 | 2.862518000  | 2.325702000  |
| H | 12.991498000 | 2.657192000  | 1.793884000  |
| C | 4.242877000  | 2.003430000  | 11.106435000 |
| H | 3.495428000  | 1.310024000  | 11.482516000 |
| C | 8.040785000  | 10.226150000 | 8.412608000  |
| H | 8.066450000  | 11.294640000 | 8.216289000  |
| C | 7.970760000  | -1.434083000 | 7.790267000  |
| H | 8.417273000  | -2.424860000 | 7.787113000  |
| C | 10.661841000 | 4.290790000  | 3.620188000  |
| H | 10.466632000 | 5.234962000  | 4.120551000  |
| C | 10.782839000 | 7.206020000  | 6.579074000  |
| H | 10.680544000 | 6.915993000  | 7.621390000  |
| C | 7.369615000  | 2.953453000  | -2.360094000 |
| H | 7.616188000  | 3.979727000  | -2.614771000 |
| C | 6.559693000  | -0.521631000 | 3.010323000  |
| H | 5.714841000  | -1.206034000 | 2.988225000  |
| C | 7.939882000  | 9.757455000  | 9.722809000  |
| H | 7.876697000  | 10.455405000 | 10.552885000 |
| C | 11.871066000 | 4.081791000  | 2.969746000  |
| H | 12.624556000 | 4.861383000  | 2.968360000  |
| C | 11.051349000 | 1.916767000  | 2.352832000  |
| H | 11.160529000 | 0.978162000  | 1.821889000  |
| C | 6.643927000  | 1.307188000  | -0.756899000 |
| H | 6.305088000  | 1.055599000  | 0.244348000  |
| C | 11.054030000 | 8.046330000  | 3.944841000  |
| H | 11.146814000 | 8.390972000  | 2.918175000  |
| C | 5.468631000  | 6.802725000  | -1.713982000 |
| H | 4.789125000  | 7.051554000  | -2.524930000 |
| C | 6.785129000  | 0.310864000  | -1.716216000 |
| H | 6.550537000  | -0.718534000 | -1.457579000 |
| C | 8.304028000  | -0.515600000 | 8.786974000  |
| H | 9.009875000  | -0.787746000 | 9.567491000  |
| C | 12.184908000 | 7.933405000  | 4.749470000  |
| H | 13.166067000 | 8.188994000  | 4.358274000  |
| C | 7.182677000  | 6.147686000  | 0.377960000  |
| H | 7.845326000  | 5.898280000  | 1.201505000  |
| C | 7.213049000  | 0.627667000  | -3.006378000 |
| H | 7.316097000  | -0.150477000 | -3.757650000 |

|   |              |              |              |
|---|--------------|--------------|--------------|
| C | 7.861277000  | -1.011406000 | 2.874104000  |
| H | 8.035991000  | -2.076456000 | 2.750022000  |
| C | 12.043229000 | 7.510669000  | 6.072775000  |
| H | 12.914458000 | 7.436199000  | 6.718244000  |
| C | 7.505113000  | 1.953682000  | -3.320527000 |
| H | 7.848488000  | 2.214217000  | -4.318415000 |
| C | 6.084392000  | 7.817199000  | -0.980825000 |
| H | 5.893354000  | 8.859503000  | -1.220622000 |
| C | 6.939139000  | 7.483222000  | 0.068424000  |
| H | 7.411966000  | 8.264174000  | 0.656812000  |

**3**

|   |             |             |              |
|---|-------------|-------------|--------------|
| Y | 7.407166000 | 3.888210000 | 4.306091000  |
| N | 6.836818000 | 4.916225000 | 6.869834000  |
| N | 6.375299000 | 5.935604000 | 6.053865000  |
| N | 5.827395000 | 2.497835000 | 5.232286000  |
| C | 7.825694000 | 5.777027000 | 6.388039000  |
| C | 9.007070000 | 5.049324000 | 6.345063000  |
| H | 9.963614000 | 5.437583000 | 6.034242000  |
| N | 7.298457000 | 2.851072000 | 2.231983000  |
| C | 8.737120000 | 3.732941000 | 6.803754000  |
| H | 9.442999000 | 2.922080000 | 6.904047000  |
| C | 7.558371000 | 1.242029000 | 7.684386000  |
| N | 6.167495000 | 2.992184000 | 1.445800000  |
| C | 6.589664000 | 2.454920000 | 7.608211000  |
| C | 5.508007000 | 2.240920000 | 6.552670000  |
| C | 6.440699000 | 7.071134000 | 4.842668000  |
| C | 7.392396000 | 3.667110000 | 7.145966000  |
| C | 7.563490000 | 7.190504000 | 5.870227000  |
| C | 6.015163000 | 2.636023000 | 9.026591000  |
| C | 8.877950000 | 7.704094000 | 5.222692000  |
| N | 9.712476000 | 3.473043000 | 3.544723000  |
| C | 4.204644000 | 1.772036000 | 6.637404000  |
| H | 3.664025000 | 1.507096000 | 7.534466000  |
| C | 7.308560000 | 4.853290000 | 0.274036000  |
| C | 6.145829000 | 3.973336000 | 0.598994000  |
| C | 5.258424000 | 6.081573000 | 3.260677000  |
| H | 4.968228000 | 5.307804000 | 2.561841000  |
| C | 3.698449000 | 1.728666000 | 5.313062000  |
| H | 2.709458000 | 1.411024000 | 5.007984000  |
| C | 7.489369000 | 0.191097000 | 6.767506000  |
| H | 6.754099000 | 0.223541000 | 5.970585000  |
| C | 5.255882000 | 1.600678000 | 9.591729000  |
| H | 5.079374000 | 0.696857000 | 9.017877000  |
| C | 4.713587000 | 2.173971000 | 4.489688000  |
| H | 4.727794000 | 2.271779000 | 3.410291000  |
| C | 7.650125000 | 1.533518000 | 2.445102000  |
| C | 4.875836000 | 4.172506000 | -0.144942000 |
| C | 9.013119000 | 7.824909000 | 3.836895000  |
| H | 8.180461000 | 7.559232000 | 3.193773000  |
| C | 6.818484000 | 0.445270000 | 2.063919000  |
| H | 5.886659000 | 0.679048000 | 1.564401000  |
| C | 5.383926000 | 7.917215000 | 4.540172000  |
| H | 5.154534000 | 8.862672000 | 5.010101000  |
| C | 7.208529000 | 8.176337000 | 6.999909000  |
| C | 8.927791000 | 1.213780000 | 3.019998000  |
| C | 5.435083000 | 5.277405000 | 7.102519000  |
| H | 5.150002000 | 6.056788000 | 6.396365000  |
| H | 5.307212000 | 5.641587000 | 8.123500000  |
| H | 4.818122000 | 4.390837000 | 6.951183000  |
| C | 4.627898000 | 7.281120000 | 3.522904000  |
| H | 3.724121000 | 7.651185000 | 3.056195000  |
| C | 8.515707000 | 1.176683000 | 8.707864000  |
| H | 8.566690000 | 1.972897000 | 9.445749000  |
| C | 5.809261000 | 3.846766000 | 11.128264000 |

|   |              |              |              |
|---|--------------|--------------|--------------|
| H | 6.049849000  | 4.721962000  | 11.725999000 |
| C | 6.304772000  | 3.744503000  | 9.826757000  |
| H | 6.943708000  | 4.535099000  | 9.444303000  |
| C | 7.181753000  | 6.248715000  | 0.284601000  |
| H | 6.245550000  | 6.697531000  | 0.602842000  |
| C | 10.000352000 | 2.208518000  | 3.149437000  |
| C | 5.020027000  | 2.832026000  | 11.658991000 |
| H | 4.630624000  | 2.909899000  | 12.670183000 |
| C | 7.011094000  | 9.529293000  | 6.685545000  |
| H | 7.108308000  | 9.855624000  | 5.654762000  |
| C | 7.153933000  | 7.801620000  | 8.344370000  |
| H | 7.357448000  | 6.773649000  | 8.628114000  |
| C | 8.356776000  | -0.898863000 | 6.871626000  |
| H | 8.280639000  | -1.705787000 | 6.148770000  |
| C | 6.863996000  | 8.734375000  | 9.342356000  |
| H | 6.826074000  | 8.414079000  | 10.380101000 |
| C | 9.241293000  | -0.137065000 | 3.282545000  |
| H | 10.192285000 | -0.361267000 | 3.758550000  |
| C | 12.319495000 | 2.830730000  | 2.821825000  |
| H | 13.336064000 | 2.570447000  | 2.539998000  |
| C | 4.753487000  | 1.702258000  | 10.884762000 |
| H | 4.162267000  | 0.887747000  | 11.294543000 |
| C | 6.715327000  | 10.459953000 | 7.675968000  |
| H | 6.560334000  | 11.500605000 | 7.404164000  |
| C | 9.309384000  | -0.950719000 | 7.884917000  |
| H | 9.980467000  | -1.801789000 | 7.965792000  |
| C | 10.678358000 | 4.410294000  | 3.520056000  |
| H | 10.376803000 | 5.418597000  | 3.790627000  |
| C | 9.962641000  | 8.070102000  | 6.033747000  |
| H | 9.866309000  | 8.009432000  | 7.114415000  |
| C | 4.859863000  | 4.797347000  | -1.401709000 |
| H | 5.787585000  | 5.161321000  | -1.831820000 |
| C | 7.166698000  | -0.861837000 | 2.332809000  |

|   |              |              |              |
|---|--------------|--------------|--------------|
| H | 6.484754000  | -1.659948000 | 2.049569000  |
| C | 6.632507000  | 10.065369000 | 9.011859000  |
| H | 6.404723000  | 10.792422000 | 9.786243000  |
| C | 11.990551000 | 4.142712000  | 3.171879000  |
| H | 12.726692000 | 4.938903000  | 3.173867000  |
| C | 11.322605000 | 1.871275000  | 2.796334000  |
| H | 11.536198000 | 0.863843000  | 2.458409000  |
| C | 3.661381000  | 3.702348000  | 0.382852000  |
| H | 3.665253000  | 3.225326000  | 1.357145000  |
| C | 10.205380000 | 8.290648000  | 3.275369000  |
| H | 10.283734000 | 8.377403000  | 2.195355000  |
| C | 8.248875000  | 7.060810000  | -0.099280000 |
| H | 8.131240000  | 8.141249000  | -0.089751000 |
| C | 2.473987000  | 3.850426000  | -0.324588000 |
| H | 1.544280000  | 3.487293000  | 0.105238000  |
| C | 9.387625000  | 0.096230000  | 8.804644000  |
| H | 10.118930000 | 0.065225000  | 9.608234000  |
| C | 11.280224000 | 8.638798000  | 4.089081000  |
| H | 12.204445000 | 9.006996000  | 3.651706000  |
| C | 8.526772000  | 4.288271000  | -0.131595000 |
| H | 8.630397000  | 3.208167000  | -0.151025000 |
| C | 2.471593000  | 4.470814000  | -1.574859000 |
| H | 1.542023000  | 4.590383000  | -2.124698000 |
| C | 8.379381000  | -1.170018000 | 2.969501000  |
| H | 8.645490000  | -2.198394000 | 3.193295000  |
| C | 11.153279000 | 8.526507000  | 5.474891000  |
| H | 11.978620000 | 8.807764000  | 6.123748000  |
| C | 3.669325000  | 4.940993000  | -2.109920000 |
| H | 3.679766000  | 5.421418000  | -3.084599000 |
| C | 9.452047000  | 6.489241000  | -0.509994000 |
| H | 10.277523000 | 7.120905000  | -0.827941000 |
| C | 9.587146000  | 5.099702000  | -0.524815000 |
| H | 10.518232000 | 4.646194000  | -0.854025000 |

<sup>2c</sup>A

|   |              |              |              |
|---|--------------|--------------|--------------|
| Y | -0.074179000 | -0.290426000 | -0.532096000 |
| N | -1.553031000 | 1.311057000  | 1.189256000  |
| C | -2.367958000 | -0.765050000 | 0.994468000  |
| H | -2.587075000 | -1.802540000 | 1.190394000  |
| C | -2.395254000 | 2.447598000  | -0.976940000 |
| N | 0.029289000  | 1.901667000  | -1.315341000 |
| C | -1.610411000 | 0.063324000  | 1.811276000  |
| C | -2.306199000 | 1.283813000  | 0.008322000  |
| N | 1.099142000  | -0.322314000 | 1.517617000  |
| C | -2.809013000 | -0.002705000 | -0.119323000 |
| H | -3.411294000 | -0.355974000 | -0.940977000 |
| O | 6.063212000  | -1.680236000 | -0.041973000 |
| C | -1.111103000 | -1.771871000 | 3.446175000  |
| N | 2.132871000  | -1.226110000 | -1.584343000 |
| C | -1.368398000 | 0.508235000  | 4.307774000  |
| C | -0.851310000 | -0.284133000 | 3.087225000  |
| C | -2.403483000 | -2.192670000 | 3.795997000  |
| H | -3.223375000 | -1.479723000 | 3.777433000  |
| C | -3.115972000 | 1.948648000  | -2.257490000 |
| C | -0.958781000 | 2.871016000  | -1.266823000 |
| C | 0.622739000  | -0.022679000 | 2.780406000  |
| C | -3.239237000 | 3.614823000  | -0.426941000 |
| C | -2.506578000 | 1.317485000  | 4.254020000  |
| H | -3.042576000 | 1.433727000  | 3.316760000  |
| C | -0.875277000 | 2.487990000  | 1.741354000  |
| H | -0.560518000 | 3.132301000  | 0.921046000  |
| H | -0.006930000 | 2.154324000  | 2.310110000  |
| H | -1.553583000 | 3.035675000  | 2.398346000  |
| C | -0.757965000 | 0.321347000  | 5.556820000  |
| H | 0.078947000  | -0.363705000 | 5.642910000  |
| C | 0.991074000  | 3.934272000  | -1.629341000 |
| H | 1.738278000  | 4.699621000  | -1.796243000 |
| C | 1.189208000  | -3.663212000 | -0.047509000 |
| C | 1.211104000  | 2.575213000  | -1.533145000 |
| H | 2.149684000  | 2.043135000  | -1.611074000 |

|   |              |              |              |
|---|--------------|--------------|--------------|
| C | 1.645642000  | 0.494091000  | 3.566857000  |
| H | 1.571186000  | 0.844186000  | 4.585977000  |
| C | 2.516602000  | -3.313215000 | -0.336478000 |
| C | -2.436933000 | 1.810007000  | -3.470211000 |
| H | -1.378349000 | 2.044744000  | -3.513100000 |
| C | 2.808318000  | 0.515082000  | 2.759403000  |
| H | 3.789926000  | 0.872039000  | 3.045210000  |
| C | -0.402348000 | 4.127378000  | -1.457134000 |
| H | -0.920915000 | 5.075203000  | -1.442447000 |
| C | 2.433254000  | 0.011619000  | 1.526836000  |
| H | 3.041420000  | -0.115851000 | 0.640661000  |
| C | -2.647693000 | -3.503128000 | 4.193516000  |
| H | -3.657298000 | -3.805640000 | 4.458665000  |
| C | -0.068176000 | -2.695949000 | 3.521007000  |
| H | 0.936824000  | -2.383786000 | 3.257219000  |
| C | -3.860092000 | 3.579557000  | 0.823683000  |
| H | -3.749039000 | 2.704864000  | 1.456958000  |
| C | -1.229428000 | 0.972822000  | 6.691819000  |
| H | -0.731816000 | 0.814407000  | 7.644862000  |
| C | 0.921268000  | -4.768934000 | 0.751014000  |
| H | -0.107091000 | -5.043023000 | 0.962317000  |
| C | -2.344179000 | 1.808097000  | 6.614758000  |
| H | -2.715062000 | 2.313779000  | 7.501856000  |
| C | -3.469770000 | 4.731789000  | -1.244013000 |
| H | -3.047774000 | 4.753963000  | -2.243898000 |
| C | -4.489142000 | 1.665770000  | -2.224397000 |
| H | -5.041665000 | 1.801059000  | -1.298255000 |
| C | -2.988810000 | 1.965917000  | 5.392533000  |
| H | -3.874954000 | 2.590624000  | 5.317944000  |
| C | -3.110007000 | 1.388065000  | -4.618891000 |
| H | -2.564315000 | 1.293168000  | -5.553989000 |
| C | -4.247894000 | 5.796064000  | -0.801237000 |
| H | -4.405668000 | 6.651697000  | -1.452388000 |
| C | -4.469845000 | 1.094616000  | -4.571911000 |
| H | -4.992397000 | 0.767065000  | -5.466389000 |



|    |              |              |              |
|----|--------------|--------------|--------------|
| H  | 12.766729000 | 3.252186000  | 14.175779000 |
| C  | 9.483003000  | -0.776609000 | 13.454245000 |
| H  | 9.945563000  | -1.660774000 | 13.884048000 |
| C  | 14.865428000 | 1.555195000  | 12.603465000 |
| H  | 15.086398000 | 1.696904000  | 11.541131000 |
| H  | 15.047158000 | 0.496928000  | 12.855002000 |
| C  | 15.646932000 | 2.473073000  | 13.534929000 |
| H  | 16.661543000 | 2.119161000  | 13.738614000 |
| H  | 15.713550000 | 3.476910000  | 13.101140000 |
| C  | 14.744765000 | 2.476105000  | 14.775006000 |
| H  | 14.841199000 | 3.386272000  | 15.372473000 |
| H  | 14.991232000 | 1.627478000  | 15.422048000 |
| C  | 6.954359000  | 2.809693000  | 10.107842000 |
| H  | 7.645683000  | 2.153877000  | 11.327883000 |
| H  | 5.906442000  | 3.077379000  | 10.312270000 |
| Si | 6.897647000  | 1.345023000  | 8.920284000  |
| C  | 5.839588000  | -0.054846000 | 9.651553000  |
| H  | 6.277706000  | -0.437410000 | 10.578568000 |
| H  | 4.825531000  | 0.296059000  | 9.873752000  |
| H  | 5.756152000  | -0.890798000 | 8.948517000  |
| C  | 6.120928000  | 1.858870000  | 7.259128000  |
| H  | 6.061954000  | 1.011758000  | 6.566011000  |
| H  | 5.108225000  | 2.247938000  | 7.406479000  |
| H  | 6.712815000  | 2.644584000  | 6.776309000  |
| C  | 8.637806000  | 0.673746000  | 8.551650000  |
| H  | 9.096292000  | 0.244867000  | 9.448103000  |
| H  | 8.597241000  | -0.110439000 | 7.787529000  |
| H  | 9.295440000  | 1.467470000  | 8.180906000  |
| H  | 7.366331000  | 3.649283000  | 9.523248000  |
| C  | 10.460072000 | 2.197215000  | 11.428680000 |
| H  | 11.466920000 | 1.858479000  | 11.170571000 |
| C  | 10.905870000 | 4.060859000  | 10.124457000 |
| C  | 12.275528000 | 4.180743000  | 10.384600000 |
| C  | 10.381712000 | 4.664084000  | 8.971382000  |
| H  | 12.698931000 | 3.724074000  | 11.276141000 |
| H  | 9.321677000  | 4.577222000  | 8.757057000  |
| C  | 13.107940000 | 4.882083000  | 9.513266000  |
| C  | 11.206859000 | 5.350162000  | 8.095089000  |
| H  | 14.162518000 | 4.968698000  | 9.749583000  |
| H  | 10.808388000 | 5.810643000  | 7.196897000  |
| C  | 12.578144000 | 5.468713000  | 8.359483000  |
| O  | 13.298291000 | 6.168286000  | 7.446464000  |
| C  | 14.684519000 | 6.324177000  | 7.670028000  |
| H  | 14.886421000 | 6.865368000  | 8.603566000  |
| H  | 15.202690000 | 5.356546000  | 7.695571000  |
| H  | 15.062028000 | 6.908867000  | 6.829884000  |

5c

|   |              |              |              |
|---|--------------|--------------|--------------|
| Y | -0.744852000 | 12.715560000 | 16.361957000 |
| N | -0.532622000 | 11.593296000 | 13.709320000 |
| O | 0.883864000  | 14.492587000 | 17.230394000 |
| N | -2.658507000 | 11.449937000 | 15.907669000 |
| N | -0.966081000 | 14.392323000 | 14.724664000 |
| C | -0.467419000 | 10.492729000 | 14.560787000 |
| C | 2.153134000  | 14.326354000 | 13.584015000 |
| C | -0.388155000 | 14.544857000 | 13.478955000 |
| C | 0.821308000  | 13.684726000 | 13.111252000 |
| C | 0.741444000  | 10.570752000 | 15.237997000 |
| H | 1.093116000  | 9.855037000  | 15.964925000 |
| C | 1.421355000  | 11.735488000 | 14.785125000 |
| H | 2.400666000  | 12.074000000 | 15.086250000 |
| N | 0.299680000  | 11.636757000 | 18.489634000 |
| C | 0.623822000  | 12.355648000 | 13.830640000 |
| C | 0.988023000  | 13.511418000 | 11.582969000 |
| C | -2.835142000 | 10.353444000 | 15.082811000 |
| C | -1.273220000 | 8.524067000  | 15.891982000 |
| C | 2.177299000  | 15.591328000 | 14.173517000 |
| H | 1.236630000  | 16.109495000 | 14.331616000 |
| C | -4.174412000 | 10.209809000 | 14.756508000 |
| H | -4.611271000 | 9.460580000  | 14.111650000 |
| C | -1.615312000 | 9.507662000  | 14.738595000 |
| C | -4.866587000 | 11.258982000 | 15.413041000 |
| H | -5.930708000 | 11.456338000 | 15.379959000 |
| C | -1.835075000 | 8.623819000  | 13.492631000 |
| C | -0.264436000 | 7.564356000  | 15.724763000 |

|   |              |              |              |
|---|--------------|--------------|--------------|
| H | 0.301666000  | 7.538970000  | 14.797182000 |
| C | -2.015796000 | 8.509972000  | 17.075716000 |
| H | -2.805677000 | 9.241040000  | 17.213369000 |
| C | -3.913990000 | 11.983407000 | 16.102159000 |
| H | -4.050292000 | 12.848269000 | 16.737161000 |
| C | 3.375944000  | 13.684716000 | 13.335948000 |
| H | 3.382102000  | 12.722903000 | 12.829848000 |
| C | 1.250533000  | 14.642362000 | 10.794692000 |
| H | 1.324495000  | 15.615869000 | 11.268426000 |
| C | -1.684985000 | 11.930198000 | 12.863335000 |
| H | -2.460873000 | 12.415168000 | 13.458408000 |
| H | -2.080991000 | 11.017177000 | 12.422819000 |
| H | -1.359772000 | 12.605275000 | 12.077268000 |
| C | -1.051430000 | 15.534385000 | 12.764889000 |
| H | -0.847553000 | 15.856922000 | 11.753860000 |
| C | 0.981540000  | 12.264245000 | 10.951672000 |
| H | 0.823632000  | 11.363062000 | 11.535679000 |
| C | -1.015864000 | 8.683919000  | 12.361843000 |
| H | -0.196139000 | 9.395383000  | 12.326667000 |
| C | 1.298278000  | 10.644767000 | 18.682712000 |
| C | -0.003815000 | 6.619117000  | 16.712777000 |
| H | 0.778276000  | 5.880412000  | 16.558141000 |
| C | 1.445051000  | 14.533140000 | 9.421996000  |
| H | 1.639480000  | 15.427586000 | 8.836214000  |
| C | -2.842278000 | 7.647347000  | 13.521664000 |
| H | -3.451937000 | 7.540984000  | 14.413082000 |
| C | 1.407569000  | 13.283984000 | 8.801613000  |
| H | 1.563589000  | 13.197328000 | 7.729972000  |
| C | -1.993775000 | 15.302347000 | 14.782000000 |
| H | -2.624426000 | 15.372478000 | 15.660222000 |
| C | 4.595072000  | 15.538034000 | 14.295013000 |
| H | 5.537080000  | 16.010191000 | 14.560728000 |
| C | -2.081563000 | 16.023445000 | 13.605679000 |
| H | -2.806420000 | 16.791813000 | 13.367939000 |
| C | -1.426721000 | 12.981315000 | 19.570503000 |
| C | 4.583111000  | 14.275126000 | 13.700285000 |
| H | 5.517716000  | 13.758781000 | 13.496710000 |
| C | -0.759750000 | 6.604949000  | 17.885331000 |
| H | -0.571529000 | 5.854451000  | 18.648498000 |
| C | 3.388392000  | 16.196251000 | 14.518283000 |
| H | 3.384585000  | 17.194023000 | 14.950344000 |
| C | 1.184552000  | 12.149902000 | 9.574984000  |
| H | 1.170100000  | 11.166643000 | 9.112372000  |
| C | -1.893313000 | 13.562701000 | 18.359832000 |
| O | 4.229695000  | 7.747439000  | 19.347481000 |
| C | -0.343839000 | 12.017810000 | 19.551257000 |
| H | -0.044325000 | 11.601606000 | 20.521821000 |
| C | -1.763943000 | 7.553131000  | 18.061261000 |
| H | -2.368732000 | 7.546611000  | 18.964812000 |
| C | -1.966192000 | 13.297834000 | 20.833573000 |
| H | -1.575670000 | 12.815625000 | 21.729034000 |
| C | 1.073113000  | 9.516764000  | 19.490249000 |
| H | 0.091994000  | 9.357971000  | 19.926200000 |
| C | -1.220504000 | 7.831322000  | 11.274660000 |
| H | -0.569077000 | 7.903471000  | 10.407698000 |
| C | -2.996188000 | 14.222376000 | 20.936555000 |
| H | -3.420282000 | 14.471945000 | 21.905104000 |
| C | 0.391306000  | 15.838228000 | 17.426060000 |
| H | 0.525398000  | 16.403398000 | 16.497779000 |
| H | -0.672324000 | 15.767398000 | 17.654889000 |
| C | -2.934695000 | 14.491136000 | 18.526302000 |
| H | -3.362583000 | 14.986210000 | 17.653814000 |
| C | 2.068293000  | 8.574109000  | 19.691438000 |
| H | 1.888610000  | 7.694615000  | 20.301205000 |
| C | 2.545185000  | 10.770912000 | 18.065131000 |
| H | 2.740745000  | 11.628134000 | 17.431086000 |
| C | 3.322910000  | 8.724427000  | 19.087300000 |
| C | -2.246566000 | 6.892970000  | 11.303294000 |
| H | -2.409126000 | 6.229789000  | 10.458242000 |
| C | -3.053614000 | 6.801635000  | 12.438056000 |
| H | -3.845406000 | 6.058760000  | 12.485279000 |
| C | -3.479505000 | 14.821675000 | 19.771951000 |
| H | -4.288834000 | 15.546399000 | 19.835075000 |
| C | 3.555689000  | 9.831106000  | 18.265205000 |
| H | 4.513021000  | 9.975246000  | 17.777000000 |



|   |             |              |              |
|---|-------------|--------------|--------------|
| C | 2.234597000 | 14.394511000 | 17.729758000 |
| H | 2.888951000 | 14.078262000 | 16.910529000 |
| H | 2.244492000 | 13.637010000 | 18.519731000 |
| C | 2.600167000 | 15.779280000 | 18.264393000 |
| H | 3.253058000 | 15.721472000 | 19.139621000 |
| H | 3.115307000 | 16.358091000 | 17.491703000 |
| C | 1.231028000 | 16.392469000 | 18.563665000 |
| H | 0.845001000 | 16.036269000 | 19.524933000 |
| H | 1.241975000 | 17.485729000 | 18.579839000 |
| C | 5.498364000 | 7.839902000  | 18.732958000 |
| H | 5.420310000 | 7.825149000  | 17.637945000 |
| H | 6.059126000 | 6.964121000  | 19.062826000 |
| H | 6.034724000 | 8.746492000  | 19.042698000 |

<sup>2c</sup>B

|   |              |              |              |
|---|--------------|--------------|--------------|
| Y | -0.676100000 | -0.481871000 | -0.046820000 |
| N | -0.848961000 | 0.786277000  | 2.563247000  |
| N | -1.421067000 | 1.725112000  | -0.353936000 |
| N | -2.512299000 | -1.231911000 | 1.179373000  |
| C | 0.153708000  | 1.502558000  | 1.917877000  |
| C | 1.220812000  | 0.635913000  | 1.727399000  |
| H | 2.158137000  | 0.891172000  | 1.258665000  |
| N | -0.619775000 | 0.003825000  | -2.505921000 |
| C | 0.858503000  | -0.629496000 | 2.265591000  |
| H | 1.468842000  | -1.519664000 | 2.288840000  |
| C | -0.560367000 | -2.973908000 | 3.180403000  |
| N | -0.559234000 | 0.145912000  | -3.648135000 |
| C | -1.321303000 | -1.630752000 | 3.341263000  |
| C | -2.599990000 | -1.601373000 | 2.506432000  |
| C | -1.246230000 | 2.846168000  | 0.437549000  |
| C | -0.427472000 | -0.524592000 | 2.782672000  |
| C | -0.035603000 | 2.913849000  | 1.369747000  |
| C | -1.611889000 | -1.448201000 | 4.842737000  |
| C | 1.246019000  | 3.324920000  | 0.594512000  |
| N | 1.574343000  | -1.550400000 | -0.800323000 |
| C | -3.925795000 | -1.838029000 | 2.846884000  |
| H | -4.309300000 | -2.110921000 | 3.819541000  |
| C | -0.575050000 | 1.686178000  | -5.447670000 |
| C | -0.504180000 | 0.301621000  | -4.934219000 |
| C | -2.544536000 | 1.963232000  | -1.112624000 |
| H | -2.902838000 | 1.223368000  | -1.819228000 |
| C | -4.692797000 | -1.602461000 | 1.678397000  |
| H | -5.768633000 | -1.674355000 | 1.581282000  |
| C | -0.924801000 | -3.903113000 | 2.202625000  |
| H | -1.762778000 | 3.687012000  | 1.547964000  |
| C | -2.356284000 | -2.428481000 | 5.516132000  |
| H | -2.712632000 | -3.295046000 | 4.967750000  |
| C | -3.795687000 | -1.234356000 | 0.693179000  |
| H | -4.004032000 | -0.936320000 | -0.327827000 |
| C | -1.051436000 | -2.530423000 | -1.395389000 |
| C | -0.380288000 | -0.915244000 | -5.763459000 |
| C | 1.218916000  | 3.574479000  | -0.780121000 |
| H | 0.284638000  | 3.451427000  | -1.318264000 |
| C | -2.254312000 | -3.161826000 | -1.752137000 |
| H | -3.203351000 | -2.681930000 | -1.522715000 |
| C | -2.254651000 | 3.767072000  | 0.180023000  |
| H | -2.399513000 | 4.723965000  | 0.660360000  |
| C | -0.191878000 | 3.964869000  | 2.487975000  |
| C | 0.122285000  | -3.261329000 | -1.711792000 |
| C | -2.140827000 | 1.341777000  | 2.971953000  |
| H | -2.465936000 | 2.062872000  | 2.221649000  |
| H | -2.043059000 | 1.839023000  | 3.938947000  |
| H | -2.866625000 | 0.533235000  | 3.044759000  |
| C | -3.087066000 | 3.197779000  | -0.815236000 |
| H | -3.975964000 | 3.637271000  | -1.249318000 |
| C | 0.515379000  | -3.279846000 | 4.026742000  |
| H | 0.795871000  | -2.579932000 | 4.809298000  |
| C | -1.367264000 | -0.270368000 | 6.957219000  |
| H | -0.961121000 | 0.570442000  | 7.513393000  |
| C | -1.105296000 | -0.382293000 | 5.590073000  |
| H | -0.482772000 | 0.366742000  | 5.110005000  |
| C | -1.173929000 | 1.947661000  | -6.690254000 |
| H | -1.577473000 | 1.126964000  | -7.274845000 |
| C | -2.136871000 | -1.231206000 | 7.604522000  |
| H | -2.343609000 | -1.145299000 | 8.667666000  |

|   |              |              |              |
|---|--------------|--------------|--------------|
| C | -0.373814000 | 5.313057000  | 2.145771000  |
| H | -0.420139000 | 5.594808000  | 1.098861000  |
| C | -0.042698000 | 3.649772000  | 3.841478000  |
| H | 0.162244000  | 2.624939000  | 4.136930000  |
| C | -0.226258000 | -5.105452000 | 2.068195000  |
| H | -0.531813000 | -5.815155000 | 1.304304000  |
| C | -0.127879000 | 4.634848000  | 4.827190000  |
| H | -0.011393000 | 4.358684000  | 5.871838000  |
| C | 0.099200000  | -4.528192000 | -2.325590000 |
| H | 1.031681000  | -5.048159000 | -2.540970000 |
| C | -2.625374000 | -2.316623000 | 6.876092000  |
| H | -3.209961000 | -3.087080000 | 7.371765000  |
| C | -0.466822000 | 6.296531000  | 3.125195000  |
| H | -0.615226000 | 7.332192000  | 2.831295000  |
| C | 0.846866000  | -5.395420000 | 2.906491000  |
| H | 1.384730000  | -6.334542000 | 2.805897000  |
| C | 2.450704000  | 3.524448000  | 1.283771000  |
| H | 2.484125000  | 3.368582000  | 2.358624000  |
| C | 0.298203000  | -0.862494000 | -6.992193000 |
| H | 0.727343000  | 0.075781000  | -7.329420000 |
| C | -2.297214000 | -4.420381000 | -2.362869000 |
| H | -3.257744000 | -4.869401000 | -2.608418000 |
| C | -0.353235000 | 5.961374000  | 4.474699000  |
| H | -0.422809000 | 6.729638000  | 5.239692000  |
| C | -0.901067000 | -2.144553000 | -5.329881000 |
| H | -1.427045000 | -2.212004000 | -4.381347000 |
| C | 2.367692000  | 4.003864000  | -1.449835000 |
| H | 2.323626000  | 4.204863000  | -2.517352000 |
| C | -1.266300000 | 3.251931000  | -7.166995000 |
| H | -1.734577000 | 3.435711000  | -8.130075000 |
| C | -0.750649000 | -3.286731000 | -6.110179000 |
| H | -1.159383000 | -4.227187000 | -5.753074000 |
| C | 1.215887000  | -4.475267000 | 3.889430000  |
| H | 2.042314000  | -4.694499000 | 4.560783000  |
| C | 3.561353000  | 4.188184000  | -0.756924000 |
| H | 4.451491000  | 4.532187000  | -1.276964000 |
| C | -0.086662000 | 2.764416000  | -4.694089000 |
| H | 0.380005000  | 2.580195000  | -3.730647000 |
| C | -0.089666000 | -3.224202000 | -7.336206000 |
| H | 0.019023000  | -4.116332000 | -7.946411000 |
| C | -1.117549000 | -5.112487000 | -2.650995000 |
| H | -1.151900000 | -6.093257000 | -3.117723000 |
| C | 3.597980000  | 3.944082000  | 0.616781000  |
| H | 4.518936000  | 4.094446000  | 1.173698000  |
| C | 0.433459000  | -2.007199000 | -7.771778000 |
| H | 0.960685000  | -1.947765000 | -8.720077000 |
| C | -0.778977000 | 4.317403000  | -6.411320000 |
| H | -0.858230000 | 5.334587000  | -6.783678000 |
| C | -0.194300000 | 4.066889000  | -5.170487000 |
| H | 0.183129000  | 4.889695000  | -4.569910000 |
| C | 1.415306000  | -2.695276000 | -1.386914000 |
| H | 2.305048000  | -3.270925000 | -1.671866000 |
| C | 2.912547000  | -1.164435000 | -0.525226000 |
| C | 3.793116000  | -2.015933000 | 0.147450000  |
| C | 3.370832000  | 0.101319000  | -0.921288000 |
| H | 3.439436000  | -2.983220000 | 0.494694000  |
| H | 2.697226000  | 0.781642000  | -1.433784000 |
| C | 5.109466000  | -1.632612000 | 0.408979000  |
| C | 4.679349000  | 0.484699000  | -0.675143000 |
| H | 5.761145000  | -2.315285000 | 0.942595000  |
| H | 5.038168000  | 1.460231000  | -0.984354000 |
| C | 5.561560000  | -0.378503000 | -0.009018000 |
| O | 6.818875000  | 0.097276000  | 0.186859000  |
| C | 7.746680000  | -0.735758000 | 0.850690000  |
| H | 7.423038000  | -0.970359000 | 1.873352000  |
| H | 7.914648000  | -1.672891000 | 0.303851000  |
| H | 8.681436000  | -0.174670000 | 0.892546000  |

<sup>2c</sup>TS2

|   |             |             |             |
|---|-------------|-------------|-------------|
| Y | 7.363935000 | 3.852072000 | 4.609822000 |
| N | 7.057199000 | 4.981163000 | 7.239525000 |
| N | 6.772767000 | 6.071471000 | 4.294256000 |
| N | 5.454748000 | 3.060024000 | 5.668579000 |
| C | 8.119454000 | 5.695507000 | 6.691525000 |
| C | 9.177495000 | 4.808949000 | 6.545440000 |

|   |              |              |              |
|---|--------------|--------------|--------------|
| H | 10.149889000 | 5.060584000  | 6.151012000  |
| N | 7.060026000  | 3.508254000  | 2.402508000  |
| C | 8.751397000  | 3.536596000  | 7.018336000  |
| H | 9.338088000  | 2.631110000  | 7.050316000  |
| C | 7.209865000  | 1.197898000  | 7.774162000  |
| N | 7.044475000  | 3.335646000  | 1.202080000  |
| C | 6.473466000  | 2.557341000  | 7.901994000  |
| C | 5.263794000  | 2.642876000  | 6.971353000  |
| C | 6.870823000  | 7.136714000  | 5.175492000  |
| C | 7.435034000  | 3.655037000  | 7.448027000  |
| C | 8.002041000  | 7.135544000  | 6.202843000  |
| C | 6.070444000  | 2.706521000  | 9.382482000  |
| C | 9.345317000  | 7.567138000  | 5.551321000  |
| N | 9.633072000  | 2.780554000  | 3.932159000  |
| C | 3.912084000  | 2.422829000  | 7.203225000  |
| H | 3.451805000  | 2.122624000  | 8.133568000  |
| C | 7.106132000  | 5.222812000  | -0.311612000 |
| C | 7.053464000  | 3.769567000  | -0.017215000 |
| C | 5.717251000  | 6.362739000  | 3.457114000  |
| H | 5.444679000  | 5.683518000  | 2.659984000  |
| C | 3.237071000  | 2.719306000  | 5.992219000  |
| H | 2.169726000  | 2.677341000  | 5.816079000  |
| C | 6.859214000  | 0.267478000  | 6.793252000  |
| H | 6.054597000  | 0.499782000  | 6.103078000  |
| C | 5.250668000  | 1.729322000  | 9.966728000  |
| H | 4.915524000  | 0.888672000  | 9.367214000  |
| C | 4.209797000  | 3.106146000  | 5.089918000  |
| H | 4.085252000  | 3.451484000  | 4.070066000  |
| C | 7.045510000  | 1.694208000  | 3.194890000  |
| C | 7.008842000  | 2.750656000  | -1.093775000 |
| C | 9.421994000  | 7.899013000  | 4.196142000  |
| H | 8.534304000  | 7.801522000  | 3.579748000  |
| C | 5.847126000  | 1.019377000  | 2.961544000  |
| H | 4.907907000  | 1.564777000  | 2.978370000  |
| C | 5.883809000  | 8.071956000  | 4.895378000  |
| H | 5.692567000  | 8.994341000  | 5.424526000  |
| C | 7.776969000  | 8.130260000  | 7.360224000  |
| C | 8.246332000  | 0.957116000  | 3.161604000  |
| C | 5.755854000  | 5.559571000  | 7.582439000  |
| H | 5.496134000  | 6.305814000  | 6.830786000  |
| H | 5.807434000  | 6.034795000  | 8.563751000  |
| H | 5.007474000  | 4.768754000  | 7.592994000  |
| C | 5.145497000  | 7.572822000  | 3.792963000  |
| H | 4.300874000  | 8.045964000  | 3.308860000  |
| C | 8.238270000  | 0.870914000  | 8.670453000  |
| H | 8.501860000  | 1.570745000  | 9.459015000  |
| C | 6.185463000  | 3.812929000  | 11.546053000 |
| H | 6.571295000  | 4.624364000  | 12.157505000 |
| C | 6.547878000  | 3.733745000  | 10.199757000 |
| H | 7.226432000  | 4.477411000  | 9.793279000  |
| C | 6.464075000  | 5.747474000  | -1.446254000 |
| H | 5.930238000  | 5.078898000  | -2.114646000 |
| C | 5.342048000  | 2.857335000  | 12.102617000 |
| H | 5.057014000  | 2.917969000  | 13.149216000 |
| C | 7.615217000  | 9.494242000  | 7.075995000  |
| H | 7.628671000  | 9.828216000  | 6.043806000  |
| C | 7.850510000  | 7.748088000  | 8.702876000  |
| H | 8.037796000  | 6.708816000  | 8.958219000  |
| C | 7.525547000  | -0.957348000 | 6.704572000  |
| H | 7.231340000  | -1.667891000 | 5.937389000  |
| C | 7.710523000  | 8.683046000  | 9.730142000  |
| H | 7.768205000  | 8.354949000  | 10.764634000 |
| C | 8.233307000  | -0.420897000 | 2.872419000  |
| H | 9.171771000  | -0.970959000 | 2.834200000  |
| C | 4.881197000  | 1.809028000  | 11.305164000 |
| H | 4.239849000  | 1.041663000  | 11.730402000 |
| C | 7.467786000  | 10.427990000 | 8.096602000  |
| H | 7.336364000  | 11.477342000 | 7.846574000  |
| C | 8.554241000  | -1.266794000 | 7.589937000  |
| H | 9.067311000  | -2.222686000 | 7.523865000  |
| C | 10.493851000 | 7.720561000  | 6.341386000  |
| H | 10.446994000 | 7.497649000  | 7.403913000  |
| C | 7.639585000  | 2.965361000  | -2.329721000 |
| H | 8.155507000  | 3.903376000  | -2.511453000 |
| C | 5.832651000  | -0.354805000 | 2.719673000  |

|   |              |              |              |
|---|--------------|--------------|--------------|
| H | 4.884553000  | -0.865196000 | 2.567367000  |
| C | 7.505477000  | 10.026147000 | 9.431995000  |
| H | 7.393179000  | 10.755648000 | 10.229152000 |
| C | 6.370731000  | 1.518163000  | -0.880127000 |
| H | 5.881613000  | 1.337514000  | 0.072930000  |
| C | 10.613863000 | 8.377058000  | 3.645728000  |
| H | 10.648372000 | 8.644930000  | 2.592699000  |
| C | 6.493061000  | 7.113133000  | -1.712675000 |
| H | 5.982520000  | 7.498246000  | -2.591437000 |
| C | 6.362731000  | 0.537339000  | -1.865907000 |
| H | 5.858884000  | -0.407329000 | -1.678213000 |
| C | 8.909282000  | -0.344973000 | 8.576543000  |
| H | 9.699354000  | -0.579901000 | 9.285239000  |
| C | 11.747780000 | 8.526199000  | 4.439882000  |
| H | 12.670586000 | 8.911543000  | 4.014217000  |
| C | 7.764989000  | 6.111311000  | 0.550468000  |
| H | 8.249830000  | 5.730176000  | 1.443942000  |
| C | 6.986847000  | 0.765071000  | -3.092950000 |
| H | 6.974723000  | 0.001056000  | -3.865348000 |
| C | 7.029401000  | -1.077066000 | 2.657972000  |
| H | 7.017174000  | -2.141348000 | 2.441565000  |
| C | 11.684000000 | 8.188420000  | 5.792617000  |
| H | 12.559122000 | 8.305448000  | 6.426176000  |
| C | 7.626016000  | 1.983207000  | -3.317230000 |
| H | 8.125673000  | 2.170048000  | -4.264241000 |
| C | 7.163395000  | 7.984202000  | -0.854699000 |
| H | 7.185068000  | 9.050314000  | -1.062338000 |
| C | 7.796044000  | 7.475827000  | 0.278579000  |
| H | 8.309685000  | 8.147480000  | 0.960209000  |
| C | 9.517737000  | 1.588663000  | 3.443271000  |
| H | 10.421371000 | 1.008494000  | 3.223011000  |
| C | 10.952872000 | 3.234910000  | 4.191129000  |
| C | 11.879010000 | 2.440451000  | 4.873273000  |
| C | 11.342474000 | 4.515263000  | 3.770590000  |
| H | 11.576950000 | 1.466252000  | 5.248537000  |
| H | 10.631422000 | 5.154654000  | 3.256643000  |
| C | 13.177104000 | 2.891432000  | 5.112451000  |
| C | 12.633678000 | 4.964217000  | 3.991981000  |
| H | 13.865645000 | 2.253762000  | 5.655296000  |
| H | 12.939758000 | 5.951140000  | 3.664291000  |
| C | 13.564349000 | 4.156559000  | 4.662010000  |
| O | 14.798397000 | 4.694509000  | 4.832572000  |
| C | 15.775905000 | 3.918439000  | 5.495297000  |
| H | 15.479406000 | 3.686885000  | 6.526736000  |
| H | 15.979999000 | 2.981437000  | 4.960920000  |
| H | 16.682676000 | 4.524690000  | 5.512390000  |

2c

|   |              |              |              |
|---|--------------|--------------|--------------|
| Y | 1.247490000  | 11.434131000 | 16.665002000 |
| N | 2.453561000  | 12.925793000 | 18.724484000 |
| N | -0.207260000 | 13.148878000 | 17.253484000 |
| N | 1.113432000  | 9.000697000  | 16.705718000 |
| N | 3.089636000  | 12.449019000 | 15.749792000 |
| N | 0.589341000  | 10.785675000 | 14.503061000 |
| N | -0.044080000 | 11.720614000 | 13.686157000 |
| O | -0.257540000 | 6.069031000  | 21.262827000 |
| C | 3.389938000  | 11.933083000 | 18.428694000 |
| C | 4.904941000  | 13.790323000 | 15.547829000 |
| H | 5.835391000  | 14.299243000 | 15.754653000 |
| C | 1.587926000  | 10.992350000 | 19.452186000 |
| H | 0.919496000  | 10.269022000 | 19.893191000 |
| C | 0.337422000  | 14.139589000 | 20.880960000 |
| C | 1.351737000  | 12.356588000 | 19.367371000 |
| C | 0.090547000  | 13.126472000 | 19.743767000 |
| C | 4.274239000  | 12.845267000 | 16.343226000 |
| C | 2.854139000  | 10.728294000 | 18.864835000 |
| H | 3.336438000  | 9.767117000  | 18.781984000 |
| C | 5.704076000  | 13.004356000 | 18.449733000 |
| C | -0.391518000 | 13.799643000 | 18.461507000 |
| C | 2.629005000  | 14.355261000 | 18.451450000 |
| H | 3.237746000  | 14.466841000 | 17.553750000 |
| H | 3.127254000  | 14.839125000 | 19.293511000 |
| H | 1.648428000  | 14.805873000 | 18.297947000 |
| C | 1.569650000  | 14.268031000 | 21.526709000 |
| H | 2.408290000  | 13.651120000 | 21.218764000 |

|   |              |              |              |            |              |              |              |
|---|--------------|--------------|--------------|------------|--------------|--------------|--------------|
| C | 4.682004000  | 12.173770000 | 17.651105000 | H          | 6.255435000  | 14.446503000 | 21.491264000 |
| C | 5.341558000  | 10.791062000 | 17.389001000 | C          | 7.922916000  | 13.993384000 | 18.571894000 |
| C | 1.435082000  | 9.977039000  | 13.809262000 | H          | 8.880571000  | 14.197094000 | 18.100420000 |
| C | -0.961502000 | 12.122559000 | 20.289468000 | C          | 2.549570000  | 9.335032000  | 11.724424000 |
| C | -1.007796000 | 15.024949000 | 18.250968000 | H          | 2.741350000  | 9.539368000  | 10.673713000 |
| H | -1.253280000 | 15.765934000 | 18.997634000 | C          | -3.944073000 | 9.105007000  | 15.842048000 |
| C | -1.968286000 | 12.838530000 | 12.890773000 | H          | -4.620472000 | 8.429629000  | 16.359117000 |
| C | 4.078758000  | 13.983773000 | 14.410368000 | C          | 6.540944000  | 8.850602000  | 18.231778000 |
| H | 4.264341000  | 14.655519000 | 13.581904000 | H          | 7.006465000  | 8.328249000  | 19.063621000 |
| C | -2.136921000 | 9.462862000  | 14.277333000 | C          | 3.168406000  | 8.229049000  | 12.343600000 |
| H | -1.407378000 | 9.068118000  | 13.577375000 | H          | 3.825551000  | 7.573321000  | 11.781719000 |
| C | -2.215178000 | 10.846980000 | 14.485507000 | C          | -4.022983000 | 10.479716000 | 16.061129000 |
| C | 5.365563000  | 10.223215000 | 16.112721000 | H          | -4.761784000 | 10.882268000 | 16.748882000 |
| H | 4.912352000  | 10.754933000 | 15.282927000 | C          | -3.096077000 | 10.979674000 | 20.117259000 |
| C | 5.945901000  | 10.091233000 | 18.443800000 | H          | -4.001546000 | 10.776332000 | 19.551928000 |
| H | 5.962304000  | 10.530115000 | 19.437864000 | C          | -1.749401000 | 10.690578000 | 22.090213000 |
| C | -1.216452000 | 15.144162000 | 16.854680000 | H          | -1.597713000 | 10.264581000 | 23.078665000 |
| H | -1.662890000 | 15.980004000 | 16.331556000 | C          | -2.915678000 | 10.411815000 | 21.375593000 |
| C | -0.738423000 | 14.898782000 | 21.365403000 | H          | -3.681704000 | 9.770371000  | 21.803889000 |
| H | -1.722897000 | 14.766434000 | 20.928177000 | C          | -1.537577000 | 6.197410000  | 21.847235000 |
| C | 1.670078000  | 7.370246000  | 18.486795000 | H          | -2.330856000 | 5.875664000  | 21.159626000 |
| H | 2.680447000  | 7.265878000  | 18.100227000 | H          | -1.735040000 | 7.229455000  | 22.163875000 |
| C | 1.691723000  | 10.158352000 | 12.416090000 | H          | -1.537546000 | 5.545661000  | 22.722290000 |
| H | 1.209755000  | 10.991413000 | 11.919862000 | C          | -3.878964000 | 13.711142000 | 11.727231000 |
| C | -1.335214000 | 11.779817000 | 13.720678000 | H          | -4.916644000 | 13.612761000 | 11.363392000 |
| C | 5.971143000  | 8.982895000  | 15.897456000 |            |              |              |              |
| H | 5.982474000  | 8.566023000  | 14.894193000 |            |              |              |              |
| C | 0.767275000  | 8.243588000  | 17.857544000 |            |              |              |              |
| C | -0.713837000 | 13.990924000 | 16.286931000 |            |              |              |              |
| H | -0.661330000 | 13.728494000 | 15.240180000 |            |              |              |              |
| C | 6.954641000  | 13.277909000 | 17.875569000 |            |              |              |              |
| H | 7.175047000  | 12.905812000 | 16.880245000 |            |              |              |              |
| C | 2.044900000  | 8.829984000  | 14.435800000 |            |              |              |              |
| C | 2.989470000  | 13.150610000 | 14.567775000 |            |              |              |              |
| H | 2.139691000  | 13.002372000 | 13.912180000 |            |              |              |              |
| C | -0.569630000 | 15.796443000 | 22.414288000 |            |              |              |              |
| H | -1.419129000 | 16.376877000 | 22.764077000 |            |              |              |              |
| C | 1.726703000  | 8.358232000  | 15.743037000 |            |              |              |              |
| H | 1.992083000  | 7.311110000  | 15.924709000 |            |              |              |              |
| C | -0.894041000 | 7.678386000  | 19.538304000 |            |              |              |              |
| H | -1.891555000 | 7.825542000  | 19.934245000 |            |              |              |              |
| C | 5.482826000  | 13.422160000 | 19.764539000 |            |              |              |              |
| H | 4.548739000  | 13.175400000 | 20.260320000 |            |              |              |              |
| C | -2.999176000 | 8.599500000  | 14.947836000 |            |              |              |              |
| H | -2.936725000 | 7.529826000  | 14.767875000 |            |              |              |              |
| C | 0.009325000  | 6.805426000  | 20.152602000 |            |              |              |              |
| C | 0.676094000  | 15.939867000 | 23.026263000 |            |              |              |              |
| H | 0.807793000  | 16.638063000 | 23.848061000 |            |              |              |              |
| C | -0.510170000 | 8.389837000  | 18.401981000 |            |              |              |              |
| H | -1.221249000 | 9.054696000  | 17.920018000 |            |              |              |              |
| C | -1.216553000 | 13.942354000 | 12.453632000 |            |              |              |              |
| H | -0.179501000 | 14.023393000 | 12.761936000 |            |              |              |              |
| C | -3.167638000 | 11.347619000 | 15.383451000 |            |              |              |              |
| H | -3.229723000 | 12.419023000 | 15.552074000 |            |              |              |              |
| C | 1.741462000  | 15.162205000 | 22.585486000 |            |              |              |              |
| H | 2.712607000  | 15.241952000 | 23.066673000 |            |              |              |              |
| C | -3.308060000 | 12.737840000 | 12.487197000 |            |              |              |              |
| H | -3.902863000 | 11.887305000 | 12.804406000 |            |              |              |              |
| C | -2.125902000 | 11.826809000 | 19.576704000 |            |              |              |              |
| H | -2.280814000 | 12.279328000 | 18.602683000 |            |              |              |              |
| C | 2.887851000  | 7.984829000  | 13.666157000 |            |              |              |              |
| H | 3.315474000  | 7.114775000  | 14.160023000 |            |              |              |              |
| C | 1.296198000  | 6.660073000  | 19.617638000 |            |              |              |              |
| H | 1.992508000  | 5.991500000  | 20.114170000 |            |              |              |              |
| C | -0.786332000 | 11.539637000 | 21.552954000 |            |              |              |              |
| H | 0.101574000  | 11.775475000 | 22.133319000 |            |              |              |              |
| C | 6.556094000  | 8.289707000  | 16.953612000 |            |              |              |              |
| H | 7.031852000  | 7.327384000  | 16.783714000 |            |              |              |              |
| C | -1.790478000 | 14.914086000 | 11.642948000 |            |              |              |              |
| H | -1.196006000 | 15.765165000 | 11.322064000 |            |              |              |              |
| C | 7.675499000  | 14.433142000 | 19.872755000 |            |              |              |              |
| H | 8.433016000  | 14.988689000 | 20.418463000 |            |              |              |              |
| C | -3.124898000 | 14.803523000 | 11.247659000 |            |              |              |              |
| H | -3.572922000 | 15.566086000 | 10.616428000 |            |              |              |              |
| C | 6.455641000  | 14.133578000 | 20.469942000 |            |              |              |              |
|   |              |              |              | <b>Ia'</b> |              |              |              |
|   |              |              |              | Lu         | -4.785002000 | 6.582730000  | 11.986092000 |
|   |              |              |              | Si         | -7.558980000 | 4.108396000  | 10.487730000 |
|   |              |              |              | O          | -4.939905000 | 7.108189000  | 9.619571000  |
|   |              |              |              | O          | -3.178166000 | 4.872251000  | 10.931541000 |
|   |              |              |              | N          | -6.284143000 | 8.292120000  | 12.359227000 |
|   |              |              |              | N          | -3.482586000 | 8.704365000  | 13.599642000 |
|   |              |              |              | N          | -4.254452000 | 5.769265000  | 14.086699000 |
|   |              |              |              | C          | -7.567007000 | 7.954755000  | 12.740304000 |
|   |              |              |              | H          | -7.932792000 | 6.947130000  | 12.611842000 |
|   |              |              |              | C          | -8.233124000 | 9.039152000  | 13.269315000 |
|   |              |              |              | H          | -9.243466000 | 9.051213000  | 13.657617000 |
|   |              |              |              | C          | -7.326226000 | 10.124325000 | 13.218028000 |
|   |              |              |              | H          | -7.512554000 | 11.125642000 | 13.577111000 |
|   |              |              |              | C          | -6.153478000 | 9.643746000  | 12.649883000 |
|   |              |              |              | C          | -4.872259000 | 10.379444000 | 12.255805000 |
|   |              |              |              | C          | -4.599888000 | 11.660589000 | 13.082040000 |
|   |              |              |              | C          | -5.535326000 | 12.706092000 | 13.079497000 |
|   |              |              |              | H          | -6.452237000 | 12.602124000 | 12.509960000 |
|   |              |              |              | C          | -5.291579000 | 13.893435000 | 13.762424000 |
|   |              |              |              | H          | -6.040222000 | 14.681027000 | 13.748295000 |
|   |              |              |              | C          | -4.089091000 | 14.082895000 | 14.443115000 |
|   |              |              |              | H          | -3.896801000 | 15.011422000 | 14.973285000 |
|   |              |              |              | C          | -3.130240000 | 13.075871000 | 14.413258000 |
|   |              |              |              | H          | -2.175798000 | 13.214440000 | 14.914278000 |
|   |              |              |              | C          | -3.383480000 | 11.882710000 | 13.734833000 |
|   |              |              |              | H          | -2.609776000 | 11.121973000 | 13.703039000 |
|   |              |              |              | C          | -4.939678000 | 10.893830000 | 10.791125000 |
|   |              |              |              | C          | -6.144719000 | 10.897655000 | 10.084293000 |
|   |              |              |              | H          | -7.031171000 | 10.489945000 | 10.561971000 |
|   |              |              |              | C          | -6.223296000 | 11.446613000 | 8.801987000  |
|   |              |              |              | H          | -7.176763000 | 11.450364000 | 8.279655000  |
|   |              |              |              | C          | -5.094909000 | 11.998069000 | 8.200739000  |
|   |              |              |              | H          | -5.155581000 | 12.427971000 | 7.204573000  |
|   |              |              |              | C          | -3.889263000 | 12.016966000 | 8.904646000  |
|   |              |              |              | H          | -3.005413000 | 12.467567000 | 8.460352000  |
|   |              |              |              | C          | -3.818374000 | 11.484607000 | 10.189307000 |
|   |              |              |              | H          | -2.885287000 | 11.548149000 | 10.742229000 |
|   |              |              |              | C          | -3.758300000 | 9.356258000  | 12.402005000 |
|   |              |              |              | C          | -2.944929000 | 8.795143000  | 11.432994000 |
|   |              |              |              | H          | -2.916221000 | 9.102324000  | 10.400022000 |
|   |              |              |              | C          | -2.149594000 | 7.797139000  | 12.053919000 |
|   |              |              |              | H          | -1.373293000 | 7.208177000  | 11.594995000 |
|   |              |              |              | C          | -2.484542000 | 7.757149000  | 13.398889000 |
|   |              |              |              | C          | -4.141955000 | 8.983630000  | 14.876677000 |
|   |              |              |              | H          | -3.619880000 | 9.782360000  | 15.406619000 |
|   |              |              |              | H          | -4.135827000 | 8.076468000  | 15.480461000 |
|   |              |              |              | H          | -5.170178000 | 9.287963000  | 14.679453000 |
|   |              |              |              | C          | -2.000613000 | 6.810542000  | 14.486051000 |

|   |              |              |              |
|---|--------------|--------------|--------------|
| C | -1.242063000 | 7.550061000  | 15.612501000 |
| C | -0.972974000 | 8.920626000  | 15.567883000 |
| H | -1.327089000 | 9.512093000  | 14.729612000 |
| C | -0.234633000 | 9.547377000  | 16.573614000 |
| H | -0.045265000 | 10.615776000 | 16.511694000 |
| C | 0.261100000  | 8.809762000  | 17.643313000 |
| H | 0.833709000  | 9.295236000  | 18.428638000 |
| C | 0.031700000  | 7.434249000  | 17.683384000 |
| H | 0.434797000  | 6.837671000  | 18.497396000 |
| C | -0.697416000 | 6.812898000  | 16.674910000 |
| H | -0.826490000 | 5.735888000  | 16.697265000 |
| C | -0.960325000 | 5.820435000  | 13.897369000 |
| C | 0.257960000  | 6.292041000  | 13.384887000 |
| H | 0.451655000  | 7.361228000  | 13.366737000 |
| C | 1.235704000  | 5.410867000  | 12.929783000 |
| H | 2.171737000  | 5.801098000  | 12.538520000 |
| C | 1.027224000  | 4.032518000  | 13.004171000 |
| H | 1.797880000  | 3.342373000  | 12.671383000 |
| C | -0.169920000 | 3.553177000  | 13.530784000 |
| H | -0.334833000 | 2.482201000  | 13.620620000 |
| C | -1.159584000 | 4.439344000  | 13.964466000 |
| H | -2.086992000 | 4.064165000  | 14.385773000 |
| C | -3.243142000 | 6.077153000  | 14.982960000 |
| C | -3.552604000 | 5.587735000  | 16.244851000 |
| H | -2.969073000 | 5.700344000  | 17.147008000 |
| C | -4.804569000 | 4.936933000  | 16.133085000 |
| H | -5.357338000 | 4.446038000  | 16.923873000 |
| C | -5.192660000 | 5.067973000  | 14.816491000 |
| H | -6.096552000 | 4.706128000  | 14.348583000 |
| C | -6.411120000 | 4.885931000  | 11.753575000 |
| H | -5.860962000 | 4.032601000  | 12.184933000 |
| H | -7.105595000 | 5.156645000  | 12.568894000 |
| C | -8.157192000 | 2.387370000  | 11.062591000 |
| H | -7.316502000 | 1.695834000  | 11.191317000 |
| H | -8.850141000 | 1.937769000  | 10.341837000 |
| H | -8.673985000 | 2.455990000  | 12.026034000 |
| C | -6.761675000 | 3.804262000  | 8.775454000  |
| H | -6.340443000 | 4.712947000  | 8.335676000  |
| H | -7.504938000 | 3.405312000  | 8.075664000  |
| H | -5.953271000 | 3.066598000  | 8.839957000  |
| C | -9.141865000 | 5.146746000  | 10.246872000 |
| H | -9.730789000 | 5.136188000  | 11.171009000 |
| H | -9.768232000 | 4.723660000  | 9.453626000  |
| H | -8.952034000 | 6.196264000  | 10.002656000 |
| C | -6.243915000 | 7.516818000  | 9.107395000  |
| H | -6.508015000 | 8.441761000  | 9.619437000  |
| H | -6.964124000 | 6.740917000  | 9.367327000  |
| C | -6.063870000 | 7.701796000  | 7.603771000  |
| H | -6.334505000 | 6.788453000  | 7.062937000  |
| H | -6.681762000 | 8.518094000  | 7.221824000  |
| C | -4.565377000 | 7.978587000  | 7.470823000  |
| H | -4.348174000 | 9.025272000  | 7.707220000  |
| H | -4.168702000 | 7.754972000  | 6.476686000  |
| C | -3.991583000 | 7.064776000  | 8.541068000  |
| H | -3.897300000 | 6.030000000  | 8.187471000  |
| H | -3.026023000 | 7.399375000  | 8.927234000  |
| C | -1.861178000 | 4.935843000  | 10.348903000 |
| H | -1.111090000 | 5.015561000  | 11.144214000 |
| H | -1.814040000 | 5.822990000  | 9.715712000  |
| C | -1.709186000 | 3.629594000  | 9.590150000  |
| H | -0.663386000 | 3.391681000  | 9.378409000  |
| H | -2.255261000 | 3.669412000  | 8.640953000  |
| C | -2.367693000 | 2.649176000  | 10.562078000 |
| H | -2.731346000 | 1.738642000  | 10.078870000 |
| H | -1.653501000 | 2.362769000  | 11.339104000 |
| C | -3.510466000 | 3.472319000  | 11.158316000 |
| H | -4.461047000 | 3.286588000  | 10.656616000 |
| H | -3.636032000 | 3.319260000  | 12.233396000 |

<sup>2a</sup>IntI

|    |              |              |              |
|----|--------------|--------------|--------------|
| Lu | 0.044731000  | -0.225563000 | -0.067838000 |
| N  | -0.050939000 | 0.650763000  | 2.413877000  |
| N  | -0.019714000 | 2.033605000  | -0.333740000 |
| N  | -1.964047000 | -0.929312000 | 0.627432000  |
| C  | 1.192615000  | 1.098532000  | 1.956645000  |

|   |              |              |              |
|---|--------------|--------------|--------------|
| C | 1.987688000  | -0.027478000 | 1.783818000  |
| H | 3.003505000  | -0.021093000 | 1.419866000  |
| N | -0.637799000 | -0.177228000 | -2.337806000 |
| C | 1.231754000  | -1.166570000 | 2.162970000  |
| H | 1.558166000  | -2.194659000 | 2.138612000  |
| C | -0.831437000 | -3.081785000 | 2.800113000  |
| N | -1.062954000 | -0.389179000 | -3.390910000 |
| C | -1.244860000 | -1.589336000 | 2.930055000  |
| C | -2.338837000 | -1.231797000 | 1.925392000  |
| C | 0.429301000  | 2.969128000  | 0.582800000  |
| C | -0.027609000 | -0.740822000 | 2.561507000  |
| C | 1.499270000  | 2.549300000  | 1.587152000  |
| C | -1.689342000 | -1.378415000 | 4.389938000  |
| C | 2.915634000  | 2.599629000  | 0.950855000  |
| C | -3.721353000 | -1.204513000 | 2.034758000  |
| H | -4.307617000 | -1.377849000 | 2.925381000  |
| C | -2.296650000 | 0.478651000  | -5.217574000 |
| C | -1.528941000 | -0.611076000 | -4.576612000 |
| C | -0.935722000 | 2.690491000  | -1.125126000 |
| H | -1.466802000 | -1.378415000 | -1.911052000 |
| C | -4.227487000 | -0.878292000 | 0.750925000  |
| H | -5.267398000 | -0.764626000 | 0.473299000  |
| C | -1.304722000 | -3.884154000 | 1.759326000  |
| H | -1.980242000 | -3.459090000 | 1.024604000  |
| C | -2.766764000 | -2.126275000 | 4.887947000  |
| H | -3.266320000 | -2.836925000 | 4.237676000  |
| C | -3.132705000 | -0.720154000 | -0.072218000 |
| H | -3.108396000 | -0.451740000 | -1.120808000 |
| C | -1.263703000 | -1.932369000 | -5.185887000 |
| C | 3.098001000  | 2.896010000  | -0.402212000 |
| H | 2.231765000  | 3.083921000  | -1.027688000 |
| C | -0.198609000 | 4.188000000  | 0.366545000  |
| H | -0.067440000 | 5.097640000  | 0.934378000  |
| C | 1.545415000  | 3.465313000  | 2.825575000  |
| C | -1.188747000 | 1.513548000  | 2.750822000  |
| H | -1.176986000 | 2.381331000  | 2.090311000  |
| H | -1.112966000 | 1.841576000  | 3.788819000  |
| H | -2.108447000 | 0.945921000  | 2.608271000  |
| C | -1.074457000 | 4.005637000  | -0.731748000 |
| H | -1.732842000 | 4.745928000  | -1.167730000 |
| C | 0.028182000  | -3.654032000 | 3.748802000  |
| H | 0.387749000  | -3.051208000 | 4.578413000  |
| C | -1.417021000 | -0.414411000 | 6.607774000  |
| H | -0.867842000 | 0.243646000  | 7.275844000  |
| C | -1.007662000 | -0.543602000 | 5.278985000  |
| H | -0.129424000 | 0.001301000  | 4.946060000  |
| C | -3.359104000 | 0.172913000  | -6.082027000 |
| H | -3.609795000 | -0.864958000 | -6.278064000 |
| C | -2.514456000 | -1.129194000 | 7.075531000  |
| H | -2.836492000 | -1.028793000 | 8.108171000  |
| C | 1.849839000  | 4.824520000  | 2.658660000  |
| H | 2.042243000  | 5.208085000  | 1.661968000  |
| C | 1.396671000  | 2.985117000  | 4.129338000  |
| H | 1.225623000  | 1.926481000  | 4.301347000  |
| C | -0.921060000 | -5.223354000 | 1.664456000  |
| H | -1.304278000 | -5.831678000 | 0.849549000  |
| C | 1.493633000  | 3.838708000  | 5.230186000  |
| H | 1.372364000  | 3.436137000  | 6.232282000  |
| C | -3.182822000 | -1.994256000 | 6.208506000  |
| H | -4.024581000 | -2.581289000 | 6.565783000  |
| C | 1.939159000  | 5.679623000  | 3.751980000  |
| H | 2.170250000  | 6.729404000  | 3.592636000  |
| C | -0.057764000 | -5.779300000 | 2.604120000  |
| H | 0.239334000  | -6.821714000 | 2.528354000  |
| C | 4.049638000  | 2.385192000  | 1.747628000  |
| H | 3.928437000  | 2.182394000  | 2.808432000  |
| C | -1.045158000 | -2.035447000 | -6.568380000 |
| H | -1.070636000 | -1.141106000 | -7.183245000 |
| C | 1.752780000  | 5.192587000  | 5.046189000  |
| H | 1.826848000  | 5.859528000  | 5.900482000  |
| C | -1.214719000 | -3.093887000 | -4.400384000 |
| H | -1.404594000 | -3.032555000 | -3.332349000 |
| C | 4.382030000  | 2.967872000  | -0.946954000 |
| H | 4.502239000  | 3.205489000  | -2.000463000 |
| C | -4.096036000 | 1.192950000  | -6.676024000 |

|    |              |              |              |
|----|--------------|--------------|--------------|
| H  | -4.917464000 | 0.940939000  | -7.340932000 |
| C  | -0.943448000 | -4.327757000 | -4.984230000 |
| H  | -0.908923000 | -5.217722000 | -4.362526000 |
| C  | 0.416903000  | -4.986955000 | 3.649897000  |
| H  | 1.084056000  | -5.409569000 | 4.396568000  |
| C  | 5.500633000  | 2.740520000  | -0.150578000 |
| H  | 6.498539000  | 2.796079000  | -0.576626000 |
| C  | -1.993747000 | 1.824925000  | -4.961638000 |
| H  | -1.162835000 | 2.080628000  | -4.309424000 |
| C  | -0.731463000 | -4.423723000 | -6.358967000 |
| H  | -0.525624000 | -5.388313000 | -6.813756000 |
| C  | 5.328914000  | 2.447060000  | 1.202717000  |
| H  | 6.193376000  | 2.276118000  | 1.838710000  |
| C  | -0.786770000 | -3.274284000 | -7.146978000 |
| H  | -0.617053000 | -3.339048000 | -8.218092000 |
| C  | -3.794764000 | 2.528625000  | -6.411034000 |
| H  | -4.375098000 | 3.321917000  | -6.873128000 |
| C  | -2.743259000 | 2.839186000  | -5.549660000 |
| H  | -2.495946000 | 3.875944000  | -5.340392000 |
| C  | 1.192520000  | -1.965728000 | -1.200045000 |
| H  | 0.492219000  | -2.482714000 | -1.875959000 |
| H  | 1.334374000  | -2.672175000 | -0.361764000 |
| Si | 2.818941000  | -1.862220000 | -2.131460000 |
| C  | 3.350646000  | -3.568243000 | -2.802781000 |
| H  | 3.485805000  | -4.287590000 | -1.987487000 |
| H  | 2.591891000  | -3.974325000 | -3.480675000 |
| H  | 4.295438000  | -3.506940000 | -3.355276000 |
| C  | 2.690547000  | -0.685508000 | -3.622994000 |
| H  | 3.648407000  | -0.622025000 | -4.151212000 |
| H  | 1.940895000  | -1.032344000 | -4.342484000 |
| H  | 2.414236000  | 0.326505000  | -3.308450000 |
| C  | 4.230926000  | -1.234072000 | -1.018578000 |
| H  | 4.311372000  | -1.826255000 | -0.099772000 |
| H  | 5.192675000  | -1.306575000 | -1.538567000 |
| H  | 4.090023000  | -0.183836000 | -0.742312000 |

2a<sup>+</sup> TSI

|    |             |             |              |
|----|-------------|-------------|--------------|
| Lu | 6.969594000 | 4.037833000 | 4.725525000  |
| N  | 6.924538000 | 4.882153000 | 7.272358000  |
| N  | 6.728259000 | 6.268520000 | 4.585229000  |
| N  | 5.044340000 | 3.252698000 | 5.480284000  |
| C  | 8.125906000 | 5.377688000 | 6.761890000  |
| C  | 8.949332000 | 4.281141000 | 6.530363000  |
| H  | 9.954506000 | 4.333360000 | 6.140460000  |
| N  | 6.929960000 | 3.625146000 | 2.613604000  |
| C  | 8.246502000 | 3.111011000 | 6.924082000  |
| H  | 8.610529000 | 2.095032000 | 6.893428000  |
| C  | 6.267633000 | 1.126221000 | 7.613391000  |
| N  | 6.667429000 | 3.201634000 | 1.499608000  |
| C  | 5.810592000 | 2.603468000 | 7.770076000  |
| C  | 4.692050000 | 2.939002000 | 6.782843000  |
| C  | 7.219071000 | 7.225756000 | 5.456745000  |
| C  | 6.993466000 | 3.492760000 | 7.387253000  |
| C  | 8.365603000 | 6.839698000 | 6.386410000  |
| C  | 5.388180000 | 2.782111000 | 9.240249000  |
| C  | 9.737537000 | 6.922464000 | 5.663324000  |
| C  | 3.310730000 | 2.911367000 | 6.897059000  |
| H  | 2.734483000 | 2.715154000 | 7.789391000  |
| C  | 5.464075000 | 4.744882000 | 0.054409000  |
| C  | 6.109447000 | 3.443482000 | 0.354012000  |
| C  | 5.716584000 | 6.876023000 | 3.876404000  |
| H  | 5.158664000 | 6.327247000 | 3.129648000  |
| C  | 2.784740000 | 3.212583000 | 5.613623000  |
| H  | 1.739444000 | 3.281542000 | 5.342198000  |
| C  | 5.792831000 | 0.318739000 | 6.576880000  |
| H  | 5.082369000 | 0.726961000 | 5.865894000  |
| C  | 4.327855000 | 2.013658000 | 9.743085000  |
| H  | 3.822834000 | 1.310453000 | 9.089117000  |
| C  | 3.865931000 | 3.410895000 | 4.782478000  |
| H  | 3.878490000 | 3.664698000 | 3.729055000  |
| C  | 6.160642000 | 2.359791000 | -0.655416000 |
| C  | 9.826976000 | 7.161246000 | 4.289413000  |
| H  | 8.917733000 | 7.299901000 | 3.714129000  |
| C  | 6.523983000 | 8.414905000 | 5.292325000  |
| H  | 6.665239000 | 9.331817000 | 5.846178000  |

|    |              |              |              |
|----|--------------|--------------|--------------|
| C  | 8.453556000  | 7.754722000  | 7.621566000  |
| C  | 5.773050000  | 5.699286000  | 7.671675000  |
| H  | 5.743244000  | 6.591239000  | 7.045628000  |
| H  | 5.869023000  | 5.988067000  | 8.719540000  |
| H  | 4.865023000  | 5.112170000  | 7.531866000  |
| C  | 5.561364000  | 8.187524000  | 4.276637000  |
| H  | 4.835353000  | 8.896118000  | 3.899668000  |
| C  | 7.170345000  | 0.573220000  | 8.533272000  |
| H  | 7.530430000  | 1.178444000  | 9.360959000  |
| C  | 5.695505000  | 3.702508000  | 11.472119000 |
| H  | 6.251606000  | 4.351743000  | 12.143042000 |
| C  | 6.080255000  | 3.604270000  | 10.133499000 |
| H  | 6.947264000  | 4.164183000  | 9.795295000  |
| C  | 4.310573000  | 4.808393000  | -0.745888000 |
| H  | 3.882717000  | 3.890910000  | -1.139004000 |
| C  | 4.613097000  | 2.968618000  | 11.945503000 |
| H  | 4.309610000  | 3.045359000  | 12.985716000 |
| C  | 8.719237000  | 9.119804000  | 7.438269000  |
| H  | 8.853946000  | 9.504855000  | 6.432439000  |
| C  | 8.368075000  | 7.274064000  | 8.930681000  |
| H  | 8.221973000  | 6.213018000  | 9.110867000  |
| C  | 6.217908000  | -1.006167000 | 6.457340000  |
| H  | 5.831849000  | -1.618970000 | 5.647200000  |
| C  | 8.493214000  | 8.132668000  | 10.024788000 |
| H  | 8.421098000  | 7.731102000  | 11.031960000 |
| C  | 3.936165000  | 2.115122000  | 11.073865000 |
| H  | 3.106734000  | 1.513163000  | 11.434952000 |
| C  | 8.837639000  | 9.979186000  | 8.525436000  |
| H  | 9.037616000  | 11.033566000 | 8.355062000  |
| C  | 7.124272000  | -1.542182000 | 7.367633000  |
| H  | 7.452670000  | -2.573593000 | 7.273331000  |
| C  | 10.924277000 | 6.774077000  | 6.395810000  |
| H  | 10.874032000 | 6.615391000  | 7.469794000  |
| C  | 6.238760000  | 2.647506000  | -2.027842000 |
| H  | 6.246665000  | 3.682306000  | -2.356669000 |
| C  | 8.717398000  | 9.490915000  | 9.827122000  |
| H  | 8.813640000  | 10.161445000 | 10.676343000 |
| C  | 6.168210000  | 1.011734000  | -0.260718000 |
| H  | 6.086958000  | 0.774871000  | 0.796392000  |
| C  | 11.072297000 | 7.237954000  | 3.661274000  |
| H  | 11.120595000 | 7.431614000  | 2.593052000  |
| C  | 3.708678000  | 6.030841000  | -1.028151000 |
| H  | 2.811754000  | 6.058227000  | -1.641303000 |
| C  | 6.261074000  | -0.009518000 | -1.200853000 |
| H  | 6.259775000  | -1.045138000 | -0.870864000 |
| C  | 7.600111000  | -0.744971000 | 8.409337000  |
| H  | 8.299473000  | -1.153054000 | 9.134288000  |
| C  | 12.244125000 | 7.075335000  | 4.395131000  |
| H  | 13.211733000 | 7.136741000  | 3.904814000  |
| C  | 5.989665000  | 5.940561000  | 0.563184000  |
| H  | 6.878558000  | 5.912736000  | 1.186744000  |
| C  | 6.337735000  | 0.290566000  | -2.561203000 |
| H  | 6.402824000  | -0.506957000 | -3.296064000 |
| C  | 12.165146000 | 6.843232000  | 5.768834000  |
| H  | 13.072067000 | 6.725727000  | 6.355947000  |
| C  | 6.325379000  | 1.623895000  | -2.967834000 |
| H  | 6.392477000  | 1.871642000  | -4.023943000 |
| C  | 4.245794000  | 7.214342000  | -0.520884000 |
| H  | 3.774330000  | 8.168034000  | -0.741288000 |
| C  | 5.387572000  | 7.163352000  | 0.277129000  |
| H  | 5.809739000  | 8.074890000  | 0.690270000  |
| C  | 7.968663000  | 2.054328000  | 3.529321000  |
| H  | 7.258709000  | 1.366124000  | 3.069766000  |
| H  | 8.000154000  | 1.788762000  | 4.604327000  |
| Si | 9.697159000  | 1.914251000  | 2.766610000  |
| C  | 10.190117000 | 0.076406000  | 2.747253000  |
| H  | 10.192406000 | -0.349154000 | 3.756054000  |
| H  | 9.493006000  | -0.508281000 | 2.138164000  |
| H  | 11.193064000 | -0.051379000 | 2.324581000  |
| C  | 9.770950000  | 2.585198000  | 0.998896000  |
| H  | 10.781609000 | 2.444961000  | 0.599289000  |
| H  | 9.069858000  | 2.071190000  | 0.335712000  |
| H  | 9.541145000  | 3.654259000  | 0.967567000  |
| C  | 10.972566000 | 2.854471000  | 3.815834000  |
| H  | 11.005027000 | 2.483398000  | 4.846020000  |

|   |              |             |             |
|---|--------------|-------------|-------------|
| H | 11.972844000 | 2.717210000 | 3.390473000 |
| H | 10.777478000 | 3.931939000 | 3.837354000 |

**2a<sup>+</sup>Int2**

|    |              |              |              |
|----|--------------|--------------|--------------|
| Lu | -0.187504000 | 0.434131000  | -0.420782000 |
| N  | -0.138288000 | 1.328713000  | 2.094795000  |
| N  | 0.222078000  | 2.589866000  | -0.768271000 |
| N  | -2.284619000 | 0.248747000  | 0.294387000  |
| C  | 1.148485000  | 1.580436000  | 1.615571000  |
| C  | 1.749662000  | 0.345399000  | 1.401778000  |
| H  | 2.752168000  | 0.202568000  | 1.028882000  |
| N  | 0.569979000  | -0.875349000 | -1.979757000 |
| C  | 0.819879000  | -0.668004000 | 1.757623000  |
| H  | 0.973562000  | -1.736228000 | 1.712104000  |
| C  | -1.526320000 | -2.226908000 | 2.307546000  |
| N  | 0.177230000  | -2.045553000 | -2.530715000 |
| C  | -1.689485000 | -0.699513000 | 2.534708000  |
| C  | -2.703857000 | -0.086388000 | 1.572516000  |
| C  | 0.705752000  | 3.492049000  | 0.166057000  |
| C  | -0.347238000 | -0.048519000 | 2.196041000  |
| C  | 1.664652000  | 2.968341000  | 1.236372000  |
| C  | -2.094826000 | -0.491674000 | 4.004613000  |
| C  | 3.102448000  | 2.816586000  | 0.665968000  |
| C  | -4.037981000 | 0.252058000  | 1.731292000  |
| H  | -4.633768000 | 0.134793000  | 2.625158000  |
| C  | -2.016379000 | -1.140341000 | -3.301662000 |
| C  | -1.002368000 | -2.206538000 | -3.058946000 |
| C  | -0.527125000 | 3.320304000  | -1.664859000 |
| H  | -1.022100000 | 2.831600000  | -2.496059000 |
| C  | -4.466071000 | 0.818672000  | 0.502657000  |
| H  | -5.452543000 | 1.200049000  | 0.273536000  |
| C  | -2.053963000 | -2.857620000 | 1.178136000  |
| H  | -2.615529000 | -2.275092000 | 0.455587000  |
| C  | -3.269472000 | -1.098566000 | 4.473250000  |
| H  | -3.863455000 | -1.700957000 | 3.792930000  |
| C  | -3.375031000 | 0.801929000  | -0.339443000 |
| H  | -3.300556000 | 1.153294000  | -1.360495000 |
| C  | -1.295568000 | -3.584422000 | -3.528828000 |
| C  | 3.400684000  | 3.137590000  | -0.660431000 |
| H  | 2.607430000  | 3.475187000  | -1.318649000 |
| C  | 0.255870000  | 4.767603000  | -0.142284000 |
| H  | 0.449166000  | 5.677321000  | 0.407068000  |
| C  | 1.795654000  | 3.899908000  | 2.456925000  |
| C  | -1.115055000 | 2.366506000  | 2.442017000  |
| H  | -0.973973000 | 3.213838000  | 1.769555000  |
| H  | -0.964436000 | 2.688287000  | 3.473548000  |
| H  | -2.118294000 | 1.957437000  | 2.323393000  |
| C  | -0.531939000 | 4.654404000  | -1.316430000 |
| H  | -1.042222000 | 5.456605000  | -1.833389000 |
| C  | -0.821708000 | -3.001524000 | 3.240297000  |
| H  | -0.422285000 | -2.531613000 | 4.135045000  |
| C  | -1.703427000 | 0.349934000  | 6.252624000  |
| H  | -1.073575000 | 0.904060000  | 6.943358000  |
| C  | -1.309670000 | 0.213013000  | 4.919810000  |
| H  | -0.366607000 | 0.648412000  | 4.603368000  |
| C  | -3.382832000 | -1.385071000 | -3.092900000 |
| H  | -3.690800000 | -2.331176000 | -2.657793000 |
| C  | -2.889331000 | -0.226140000 | 6.695276000  |
| H  | -3.198510000 | -0.119971000 | 7.731224000  |
| C  | 2.225135000  | 5.221653000  | 2.268767000  |
| H  | 2.446919000  | 5.572458000  | 1.266528000  |
| C  | 1.621699000  | 3.450605000  | 3.769207000  |
| H  | 1.355478000  | 2.414206000  | 3.957457000  |
| C  | -1.871659000 | -4.227613000 | 0.977911000  |
| H  | -2.283969000 | -4.696811000 | 0.089233000  |
| C  | 1.811084000  | 4.304545000  | 4.857299000  |
| H  | 1.666067000  | 3.927076000  | 5.865928000  |
| C  | -3.668118000 | -0.958685000 | 5.798294000  |
| H  | -4.585359000 | -1.434210000 | 6.134790000  |
| C  | 2.405777000  | 6.078203000  | 3.349831000  |
| H  | 2.732006000  | 7.099615000  | 3.173894000  |
| C  | -1.162165000 | -4.985996000 | 1.904794000  |
| H  | -1.021909000 | -6.052016000 | 1.748520000  |
| C  | 4.147057000  | 2.403256000  | 1.505906000  |
| H  | 3.940493000  | 2.179910000  | 2.549340000  |

|    |              |              |              |
|----|--------------|--------------|--------------|
| C  | -2.158280000 | -3.834840000 | -4.609352000 |
| H  | -2.644885000 | -3.003943000 | -5.111004000 |
| C  | 2.190095000  | 5.626963000  | 4.652085000  |
| H  | 2.334869000  | 6.294911000  | 5.496376000  |
| C  | -0.671038000 | -4.685556000 | -2.915895000 |
| H  | -0.006694000 | -4.499450000 | -2.078546000 |
| C  | 4.710866000  | 3.044057000  | -1.136088000 |
| H  | 4.924126000  | 3.312211000  | -2.167397000 |
| C  | -4.346956000 | -0.447708000 | -3.457937000 |
| H  | -5.397696000 | -0.663795000 | -3.286203000 |
| C  | -0.895805000 | -5.980986000 | -3.369886000 |
| H  | -0.402800000 | -6.815367000 | -2.877089000 |
| C  | -0.638403000 | -4.367102000 | 3.040449000  |
| H  | -0.091028000 | -4.949510000 | 3.776920000  |
| C  | 5.738000000  | 2.618169000  | -0.298646000 |
| H  | 6.755869000  | 2.545263000  | -0.671266000 |
| C  | -1.645815000 | 0.092197000  | -3.871603000 |
| H  | -0.595688000 | 0.294253000  | -4.055516000 |
| C  | -1.756400000 | -6.214264000 | -4.443428000 |
| H  | -1.937370000 | -7.227044000 | -4.793102000 |
| C  | 5.449547000  | 2.295571000  | 1.027968000  |
| H  | 6.242995000  | 1.972587000  | 1.696636000  |
| C  | -2.384094000 | -5.133156000 | -5.060004000 |
| H  | -3.049792000 | -5.298501000 | -5.903287000 |
| C  | -3.966957000 | 0.760630000  | -4.038634000 |
| H  | -4.717653000 | 1.488948000  | -4.332345000 |
| C  | -2.611085000 | 1.027693000  | -4.239433000 |
| H  | -2.304033000 | 1.960170000  | -4.706330000 |
| C  | 2.039099000  | -0.870029000 | -1.818141000 |
| H  | 2.375479000  | -1.565342000 | -1.027132000 |
| H  | 2.347608000  | 0.143205000  | -1.509203000 |
| Si | 3.079139000  | -1.259589000 | -3.395077000 |
| C  | 4.839270000  | -0.632260000 | -3.046807000 |
| H  | 4.852556000  | 0.441341000  | -2.834491000 |
| H  | 5.280042000  | -1.147003000 | -2.186036000 |
| H  | 5.491106000  | -0.815140000 | -3.908102000 |
| C  | 3.158797000  | -3.119258000 | -3.731100000 |
| H  | 3.785157000  | -3.330714000 | -4.604935000 |
| H  | 3.589801000  | -3.649492000 | -2.874904000 |
| H  | 2.158945000  | -3.522991000 | -3.907342000 |
| C  | 2.351104000  | -0.339614000 | -4.881529000 |
| H  | 2.227807000  | 0.727560000  | -4.669508000 |
| H  | 3.006962000  | -0.435256000 | -5.753511000 |
| H  | 1.374373000  | -0.752106000 | -5.150788000 |

**2a<sup>+</sup>TS2**

|    |              |              |              |
|----|--------------|--------------|--------------|
| Lu | 0.211476000  | 0.266499000  | -0.762079000 |
| N  | -0.240207000 | 1.581278000  | 1.509920000  |
| N  | 0.179609000  | 2.390340000  | -1.482493000 |
| N  | -1.854791000 | -0.341947000 | -0.069378000 |
| C  | 0.988193000  | 2.106547000  | 1.100674000  |
| C  | 1.919235000  | 1.083125000  | 1.187761000  |
| H  | 2.958621000  | 1.160901000  | 0.909289000  |
| N  | -0.051135000 | -0.832664000 | -2.996425000 |
| C  | 1.264331000  | -0.070466000 | 1.693051000  |
| H  | 1.708142000  | -1.039500000 | 1.856192000  |
| C  | -0.625117000 | -2.125243000 | 2.402985000  |
| N  | -1.171035000 | -1.662062000 | -3.121452000 |
| C  | -1.206272000 | -0.688489000 | 2.318816000  |
| C  | -2.268395000 | -0.565564000 | 1.232232000  |
| C  | 0.265615000  | 3.543302000  | -0.720527000 |
| C  | -0.068861000 | 0.243338000  | 1.901634000  |
| C  | 1.156265000  | 3.507712000  | 0.520640000  |
| C  | -1.773317000 | -0.340925000 | 3.707166000  |
| C  | 2.648852000  | 3.724240000  | 0.144349000  |
| C  | -3.653869000 | -0.553156000 | 1.299933000  |
| H  | -4.260737000 | -0.671933000 | 2.186026000  |
| C  | -2.012135000 | -0.151611000 | -4.893580000 |
| C  | -2.077026000 | -1.326699000 | -3.978373000 |
| C  | -0.583709000 | 2.708766000  | -2.585285000 |
| H  | -0.792821000 | 1.963358000  | -3.342470000 |
| C  | -4.122810000 | -0.304499000 | -0.014203000 |
| H  | -5.153954000 | -0.219021000 | -0.331784000 |
| C  | -0.879440000 | -3.074387000 | 1.410374000  |
| H  | -1.509545000 | -2.805996000 | 0.569152000  |



|                |              |              |              |   |              |              |              |
|----------------|--------------|--------------|--------------|---|--------------|--------------|--------------|
| H              | 1.292847000  | 3.985105000  | 5.750541000  | H | -4.012948000 | -1.135474000 | 3.455580000  |
| C              | -2.999349000 | -1.465686000 | 6.377754000  | C | -1.028179000 | -0.404100000 | -4.656788000 |
| H              | -3.816401000 | -2.026460000 | 6.823798000  | C | -1.135328000 | -0.869913000 | -3.239484000 |
| C              | 1.616325000  | 6.027254000  | 3.061768000  | C | -1.298008000 | 2.544666000  | -1.342832000 |
| H              | 1.751700000  | 7.073463000  | 2.800885000  | H | -1.783735000 | 1.872135000  | -2.038616000 |
| C              | -0.035718000 | -5.557763000 | 3.040991000  | C | -4.183946000 | -0.771101000 | 1.257580000  |
| H              | 0.252437000  | -6.605314000 | 3.058489000  | H | -5.249961000 | -0.692574000 | 1.088035000  |
| C              | 3.975231000  | 2.567856000  | 1.484547000  | C | -0.945706000 | -3.607428000 | 2.152800000  |
| H              | 3.811633000  | 2.335260000  | 2.533324000  | H | -1.721927000 | -3.290605000 | 1.464171000  |
| C              | -3.547784000 | -2.030900000 | -3.468709000 | C | -2.257732000 | -1.735230000 | 5.278237000  |
| H              | -3.725853000 | -1.302787000 | -4.254734000 | H | -2.753446000 | -2.529714000 | 4.729492000  |
| C              | 1.496311000  | 5.649554000  | 4.399353000  | C | -3.189834000 | -0.647379000 | 0.310898000  |
| H              | 1.525802000  | 6.397381000  | 5.186812000  | H | -3.290147000 | -0.464707000 | -0.750964000 |
| C              | -2.033390000 | -3.106132000 | -1.913567000 | C | -2.284145000 | -1.776348000 | -2.928245000 |
| H              | -1.032544000 | -3.214455000 | -1.502161000 | C | 2.703796000  | 3.266857000  | -0.885541000 |
| C              | 4.412542000  | 3.248741000  | -1.170281000 | H | 1.793212000  | 3.289596000  | -1.474427000 |
| H              | 4.574122000  | 3.530187000  | -2.207328000 | C | -0.650828000 | 4.292660000  | -0.098434000 |
| C              | -0.705672000 | 0.177134000  | -6.881408000 | H | -0.585712000 | 5.280696000  | 0.333553000  |
| H              | -0.504817000 | 1.147780000  | -7.326021000 | C | 1.274244000  | 4.018883000  | 2.358026000  |
| C              | -3.074262000 | -3.920037000 | -1.474435000 | C | -1.208307000 | 1.841105000  | 2.718544000  |
| H              | -2.886237000 | -4.668959000 | -0.711260000 | H | -1.308239000 | 2.660733000  | 2.006490000  |
| C              | 0.512585000  | -4.661730000 | 3.959329000  | H | -1.094064000 | 2.242880000  | 3.726987000  |
| H              | 1.228955000  | -5.008159000 | 4.699649000  | H | -2.090401000 | 1.201747000  | 2.676709000  |
| C              | 5.500488000  | 3.049941000  | -0.324679000 | C | -1.542950000 | 3.884727000  | -1.121912000 |
| H              | 6.514465000  | 3.172031000  | -0.695721000 | H | -2.278787000 | 4.499513000  | -1.624174000 |
| C              | -1.261591000 | -2.298961000 | -5.734589000 | C | 0.542159000  | -3.124934000 | 3.979902000  |
| H              | -1.492039000 | -3.260884000 | -5.286501000 | H | 0.925214000  | -2.434463000 | 4.726566000  |
| C              | -4.352186000 | -3.777471000 | -2.010888000 | C | -0.913962000 | 0.214041000  | 6.730499000  |
| H              | -5.163207000 | -4.408378000 | -1.658313000 | H | -0.368248000 | 0.967451000  | 7.292317000  |
| C              | 5.275789000  | 2.702499000  | 1.007973000  | C | -0.616954000 | 0.011756000  | 5.381231000  |
| H              | 6.114501000  | 2.552978000  | 1.682792000  | H | 0.172774000  | 0.598873000  | 4.922148000  |
| C              | -4.588923000 | -2.827525000 | -3.005154000 | C | -0.671203000 | 0.922657000  | -4.935262000 |
| H              | -5.584512000 | -2.712379000 | -3.424017000 | H | -0.448779000 | 1.590757000  | -4.109930000 |
| C              | -0.922755000 | -0.934756000 | -7.696760000 | C | -1.895716000 | -0.548961000 | 7.353518000  |
| H              | -0.882614000 | -0.833444000 | -8.777773000 | H | -2.130378000 | -0.392665000 | 8.402683000  |
| C              | -1.195306000 | -2.173754000 | -7.120133000 | C | 1.397688000  | 5.378241000  | 2.034473000  |
| H              | -1.365695000 | -3.043542000 | -7.748186000 | H | 1.470038000  | 5.672664000  | 0.992652000  |
| C              | 1.876048000  | -0.944469000 | -3.181723000 | C | 1.281930000  | 3.666941000  | 3.710457000  |
| H              | 1.791551000  | -2.001068000 | -2.894758000 | H | 1.250930000  | 2.620001000  | 3.997765000  |
| H              | 1.186739000  | -1.860821000 | -0.596127000 | C | -0.462121000 | -4.916841000 | 2.112252000  |
| Si             | 3.515891000  | -0.284575000 | -3.906911000 | H | -0.868165000 | -5.615156000 | 1.384943000  |
| C              | 4.848676000  | -0.380695000 | -2.570682000 | C | 1.354379000  | 4.638876000  | 4.710351000  |
| H              | 4.649461000  | 0.329886000  | -1.763968000 | H | 1.355892000  | 4.334610000  | 5.753657000  |
| H              | 4.896146000  | -1.386083000 | -2.140534000 | C | -2.561737000 | -1.531971000 | 6.620284000  |
| H              | 5.832232000  | -0.147308000 | -2.992761000 | H | -3.313581000 | -2.153508000 | 7.099194000  |
| C              | 3.946189000  | -1.467680000 | -5.324699000 | C | 1.461429000  | 6.350117000  | 3.027510000  |
| H              | 4.888601000  | -1.169902000 | -5.796904000 | H | 1.549334000  | 7.396395000  | 2.747392000  |
| H              | 4.065322000  | -2.493733000 | -4.961775000 | C | 0.528520000  | -5.331885000 | 2.997468000  |
| H              | 3.167930000  | -1.467131000 | -6.094014000 | H | 0.902733000  | -6.351519000 | 2.964938000  |
| C              | 3.243164000  | 1.469394000  | -4.542265000 | C | 3.810532000  | 3.082569000  | 1.242914000  |
| H              | 2.840137000  | 2.104254000  | -3.749119000 | H | 3.763665000  | 2.978589000  | 2.323582000  |
| H              | 4.180986000  | 1.907497000  | -4.899081000 | C | -3.564733000 | -1.536088000 | -3.447878000 |
| H              | 2.528304000  | 1.470776000  | -5.370273000 | H | -3.726601000 | -0.680816000 | -4.097524000 |
| <b>2a' TS3</b> |              |              |              | C | 1.431118000  | 5.986233000  | 4.374022000  |
| Lu             | -0.056992000 | -0.111000000 | -0.104017000 | H | 1.484170000  | 6.744729000  | 5.149939000  |
| N              | -0.032600000 | 1.045623000  | 2.354629000  | C | -2.081129000 | -2.888274000 | -2.099415000 |
| N              | -0.299294000 | 2.090062000  | -0.510601000 | H | -1.084292000 | -3.082646000 | -1.714134000 |
| N              | -1.947148000 | -0.800997000 | 0.886108000  | C | 3.944389000  | 3.417208000  | -1.509578000 |
| C              | 1.116393000  | 1.548162000  | 1.743084000  | H | 3.984662000  | 3.566135000  | -2.585443000 |
| C              | 1.991435000  | 0.483597000  | 1.580534000  | C | -0.613042000 | 1.372303000  | -6.250191000 |
| H              | 2.966173000  | 0.545020000  | 1.121324000  | H | -0.348331000 | 2.406161000  | -6.454246000 |
| N              | 1.415505000  | -0.150802000 | -3.218867000 | C | -3.137508000 | -3.741677000 | -1.795498000 |
| C              | 1.381220000  | -0.677068000 | 2.126215000  | H | -2.967898000 | -4.608741000 | -1.163613000 |
| H              | 1.797591000  | -1.671691000 | 2.148994000  | C | 1.029880000  | -4.427928000 | 3.934713000  |
| C              | -0.445870000 | -2.693457000 | 3.083369000  | H | 1.795980000  | -4.740335000 | 4.639553000  |
| N              | -0.316380000 | -0.536155000 | -2.314004000 | C | 5.119876000  | 3.390774000  | -0.763292000 |
| C              | -0.968761000 | -1.232540000 | 3.149690000  | H | 6.083356000  | 3.514894000  | -1.250404000 |
| C              | -2.172544000 | -1.027022000 | 2.235152000  | C | -1.319947000 | -1.269572000 | -5.720117000 |
| C              | 0.094800000  | 3.174654000  | 0.249196000  | H | -1.602459000 | -2.297709000 | -5.512243000 |
| C              | 0.131294000  | -0.321546000 | 2.608410000  | C | -4.412310000 | -3.483363000 | -2.297819000 |
| C              | 1.252908000  | 2.976587000  | 1.223553000  | H | -5.238553000 | -4.144054000 | -2.050616000 |
| C              | -1.298566000 | -0.946055000 | 4.626447000  | C | 5.047737000  | 3.217979000  | 0.620021000  |
| C              | 2.621729000  | 3.099307000  | 0.498790000  | H | 5.955656000  | 3.204687000  | 1.217299000  |
| C              | -3.534133000 | -1.013614000 | 2.494719000  | C | -4.625036000 | -2.376777000 | -3.120005000 |
|                |              |              |              | H | -5.617990000 | -2.170228000 | -3.509607000 |



|    |              |              |              |
|----|--------------|--------------|--------------|
| C  | -0.888824000 | 0.499724000  | -7.303893000 |
| H  | -0.837171000 | 0.852343000  | -8.330620000 |
| C  | -1.236258000 | -0.823872000 | -7.037087000 |
| H  | -1.450804000 | -1.507659000 | -7.853823000 |
| C  | 2.270917000  | -0.791067000 | -2.619066000 |
| H  | 1.941477000  | -1.269263000 | -1.480870000 |
| H  | 1.501001000  | -1.449258000 | -0.475988000 |
| Si | 4.059091000  | -0.971591000 | -3.285741000 |
| C  | 5.214342000  | -0.697067000 | -1.818424000 |
| H  | 5.128460000  | 0.323795000  | -1.434443000 |
| H  | 4.987028000  | -1.393331000 | -1.005333000 |
| H  | 6.254525000  | -0.859159000 | -2.121832000 |
| C  | 4.169090000  | -2.751493000 | -3.913047000 |
| H  | 5.180788000  | -2.961816000 | -4.276865000 |
| H  | 3.938559000  | -3.465819000 | -3.117048000 |
| H  | 3.469524000  | -2.920173000 | -4.737107000 |
| C  | 4.380271000  | 0.267320000  | -4.670461000 |
| H  | 4.298767000  | 1.292111000  | -4.297618000 |
| H  | 5.385358000  | 0.131669000  | -5.084201000 |
| H  | 3.653715000  | 0.142305000  | -5.478217000 |

2a<sup>+</sup>Int4

|    |              |              |              |
|----|--------------|--------------|--------------|
| Lu | -1.018947000 | 0.386676000  | -0.138480000 |
| N  | -0.280720000 | 1.275859000  | 2.244772000  |
| N  | -1.951875000 | 2.402141000  | -0.080712000 |
| N  | -2.152218000 | -0.974395000 | 1.222817000  |
| C  | 0.382643000  | 2.103840000  | 1.333343000  |
| C  | 1.322096000  | 1.313927000  | 0.677580000  |
| H  | 2.012562000  | 1.640660000  | -0.085730000 |
| N  | 3.847180000  | -0.308256000 | -0.996948000 |
| C  | 1.232732000  | -0.003310000 | 1.201257000  |
| H  | 1.839828000  | -0.844470000 | 0.902875000  |
| C  | 0.435342000  | -2.483424000 | 2.457650000  |
| N  | -1.076088000 | -0.334717000 | -2.088121000 |
| C  | -0.339637000 | -1.218924000 | 2.924438000  |
| C  | -1.813090000 | -1.301517000 | 2.524101000  |
| C  | -1.505739000 | 3.497599000  | 0.638450000  |
| C  | 0.241607000  | -0.017951000 | 2.177026000  |
| C  | -0.028837000 | 3.545845000  | 1.030480000  |
| C  | -0.137391000 | -1.117433000 | 4.447939000  |
| C  | 0.843621000  | 4.043333000  | -0.155864000 |
| C  | -2.941103000 | -1.732034000 | 3.208075000  |
| H  | -2.999001000 | -2.038223000 | 4.242504000  |
| C  | -0.104726000 | -0.648808000 | -4.285701000 |
| C  | -1.217839000 | -0.748087000 | -3.279630000 |
| C  | -3.272901000 | 2.644301000  | -0.385458000 |
| H  | -3.850180000 | 1.922441000  | -0.951716000 |
| C  | -4.022455000 | -1.674480000 | 2.291994000  |
| H  | -5.054224000 | -1.934049000 | 2.490831000  |
| C  | -0.161010000 | -3.448470000 | 1.641928000  |
| H  | -1.188017000 | -3.313355000 | 1.320089000  |
| C  | -0.599592000 | -2.156588000 | 5.269094000  |
| H  | -1.095684000 | -3.010026000 | 4.818587000  |
| C  | -3.503088000 | -1.211650000 | 1.100492000  |
| H  | -4.013402000 | -1.024224000 | 0.162842000  |
| C  | -2.514702000 | -1.352531000 | -3.741677000 |
| C  | 0.299677000  | 4.256845000  | -1.425223000 |
| H  | -0.756726000 | 4.075126000  | -1.591196000 |
| C  | -2.539559000 | 4.409916000  | 0.787580000  |
| H  | -2.505120000 | 5.352734000  | 1.314130000  |
| C  | 0.243525000  | 4.496730000  | 2.210674000  |
| C  | -1.358450000 | 1.702857000  | 3.143269000  |
| H  | -1.914585000 | 2.507812000  | 2.661676000  |
| H  | -0.940536000 | 2.057853000  | 4.086536000  |
| H  | -2.015943000 | 0.852458000  | 3.328857000  |
| C  | -3.670238000 | 3.860776000  | 0.128133000  |
| H  | -4.653846000 | 4.305520000  | 0.050441000  |
| C  | 1.758826000  | -2.685226000 | 2.874775000  |
| H  | 2.232218000  | -1.956465000 | 3.526927000  |
| C  | 0.785655000  | -0.048026000 | 6.429731000  |
| H  | 1.346580000  | 0.772650000  | 6.868791000  |
| C  | 0.580474000  | -0.080004000 | 5.048948000  |
| H  | 1.008697000  | 0.708382000  | 4.436919000  |
| C  | 0.818151000  | 0.401313000  | -4.190091000 |
| H  | 0.686465000  | 1.138316000  | -3.403620000 |

|    |              |              |              |
|----|--------------|--------------|--------------|
| C  | 0.282820000  | -1.063225000 | 7.236442000  |
| H  | 0.438391000  | -1.039489000 | 8.311315000  |
| C  | -0.049989000 | 5.861021000  | 2.067705000  |
| H  | -0.463617000 | 6.220307000  | 1.131012000  |
| C  | 0.861620000  | 4.081205000  | 3.392952000  |
| H  | 1.161069000  | 3.044072000  | 3.512078000  |
| C  | 0.549057000  | -4.585763000 | 1.250837000  |
| H  | 0.061885000  | -5.329884000 | 0.626245000  |
| C  | 1.130830000  | 4.984069000  | 4.423515000  |
| H  | 1.611703000  | 4.631932000  | 5.332210000  |
| C  | -0.404537000 | -2.124099000 | 6.645911000  |
| H  | -0.779594000 | -2.939213000 | 7.258876000  |
| C  | 0.209276000  | 6.761959000  | 3.095105000  |
| H  | -0.034151000 | 7.812356000  | 2.960069000  |
| C  | 1.864996000  | -4.774322000 | 1.665865000  |
| H  | 2.411531000  | -5.666143000 | 1.370661000  |
| C  | 2.207185000  | 4.302856000  | 0.041228000  |
| H  | 2.642340000  | 4.162701000  | 1.026990000  |
| C  | -3.033651000 | -1.099175000 | -5.018831000 |
| H  | -2.469969000 | -0.484199000 | -5.714626000 |
| C  | 0.794279000  | 6.326338000  | 4.284616000  |
| H  | 1.000466000  | 7.030620000  | 5.085635000  |
| C  | -3.264335000 | -2.135379000 | -2.852994000 |
| H  | -2.864976000 | -2.324493000 | -1.860590000 |
| C  | 1.102585000  | 4.710810000  | -2.473951000 |
| H  | 0.658285000  | 4.877768000  | -3.451644000 |
| C  | 1.873906000  | 0.504148000  | -5.089733000 |
| H  | 2.569911000  | 1.334805000  | -5.010984000 |
| C  | -4.495038000 | -2.660978000 | -3.234039000 |
| H  | -5.058405000 | -3.276413000 | -2.537635000 |
| C  | 2.469484000  | -3.815153000 | 2.480149000  |
| H  | 3.491765000  | -3.953208000 | 2.822392000  |
| C  | 2.458175000  | 4.953482000  | -2.271234000 |
| H  | 3.081093000  | 5.307275000  | -3.088314000 |
| C  | 0.067080000  | -1.606428000 | -5.296061000 |
| H  | -0.635163000 | -2.430959000 | -5.378171000 |
| C  | -5.007112000 | -2.395163000 | -4.505586000 |
| H  | -5.971663000 | -2.799278000 | -4.800830000 |
| C  | 3.009080000  | 4.746907000  | -1.006159000 |
| H  | 4.064379000  | 4.938193000  | -0.831403000 |
| C  | -4.276567000 | -1.607523000 | -5.393242000 |
| H  | -4.674259000 | -1.386544000 | -6.380181000 |
| C  | 2.036654000  | -0.454825000 | -6.092276000 |
| H  | 2.857668000  | -0.371428000 | -6.799763000 |
| C  | 1.135775000  | -1.515055000 | -6.187026000 |
| H  | 1.259666000  | -2.269057000 | -6.959981000 |
| C  | 4.037026000  | -1.318685000 | -1.542722000 |
| H  | -2.729913000 | -5.725028000 | -3.691698000 |
| H  | -2.501670000 | -6.431431000 | -3.734803000 |
| Si | 4.342987000  | -2.966833000 | -2.418853000 |
| C  | 5.516752000  | -3.934532000 | -1.305143000 |
| H  | 6.462063000  | -3.401696000 | -1.167741000 |
| H  | 5.069502000  | -4.100998000 | -0.321105000 |
| H  | 5.737241000  | -4.911008000 | -1.749399000 |
| C  | 2.665926000  | -3.800329000 | -2.591568000 |
| H  | 2.778966000  | -4.773743000 | -3.081015000 |
| H  | 2.205914000  | -3.960611000 | -1.612193000 |
| H  | 1.989372000  | -3.189591000 | -3.195966000 |
| C  | 5.119905000  | -2.546419000 | -4.081806000 |
| H  | 6.056011000  | -1.995377000 | -3.953500000 |
| H  | 5.337493000  | -3.464437000 | -4.638062000 |
| H  | 4.436652000  | -1.937249000 | -4.680159000 |

2a<sup>+</sup>TS4

|    |              |             |             |
|----|--------------|-------------|-------------|
| Lu | 7.876856000  | 4.095284000 | 4.881140000 |
| N  | 7.291077000  | 4.990904000 | 7.313806000 |
| N  | 6.801989000  | 6.031297000 | 4.550452000 |
| N  | 6.388857000  | 2.592870000 | 5.545941000 |
| C  | 8.276266000  | 5.864938000 | 6.838033000 |
| C  | 9.457855000  | 5.138606000 | 6.764377000 |
| H  | 10.400578000 | 5.517021000 | 6.399827000 |
| C  | 9.195745000  | 3.818751000 | 7.213446000 |
| H  | 9.904272000  | 3.007236000 | 7.265952000 |
| C  | 8.018098000  | 1.286704000 | 8.018589000 |
| C  | 7.047456000  | 2.499646000 | 7.953861000 |

|   |              |              |              |
|---|--------------|--------------|--------------|
| C | 6.009209000  | 2.309376000  | 6.848788000  |
| C | 6.871746000  | 7.172798000  | 5.329803000  |
| C | 7.854521000  | 3.736032000  | 7.561880000  |
| C | 8.005422000  | 7.287250000  | 6.345025000  |
| C | 6.429309000  | 2.619616000  | 9.360210000  |
| C | 9.311226000  | 7.806651000  | 5.684336000  |
| N | 9.836955000  | 3.366578000  | 3.969434000  |
| C | 4.717917000  | 1.804533000  | 6.858087000  |
| H | 4.140032000  | 1.509912000  | 7.721897000  |
| C | 5.693522000  | 6.181760000  | 3.746308000  |
| H | 5.391946000  | 5.394160000  | 3.068821000  |
| C | 4.280916000  | 1.764936000  | 5.508732000  |
| H | 3.317919000  | 1.425601000  | 5.149899000  |
| C | 7.921842000  | 0.224045000  | 7.117030000  |
| H | 7.170654000  | 0.253369000  | 6.335174000  |
| C | 5.644486000  | 1.568343000  | 9.856103000  |
| H | 5.476514000  | 0.692372000  | 9.238447000  |
| C | 5.320378000  | 2.248509000  | 4.743751000  |
| H | 5.377418000  | 2.371777000  | 3.668903000  |
| C | 7.908286000  | 3.425867000  | 2.319177000  |
| C | 9.435665000  | 7.910778000  | 4.296633000  |
| H | 8.596085000  | 7.641764000  | 3.664162000  |
| C | 6.887414000  | 3.614636000  | 1.387907000  |
| H | 6.291348000  | 4.524161000  | 1.392281000  |
| C | 5.826546000  | 8.026137000  | 5.012444000  |
| H | 5.606455000  | 8.980958000  | 5.467564000  |
| C | 7.656962000  | 8.251492000  | 7.493282000  |
| C | 8.682101000  | 2.253831000  | 2.219728000  |
| C | 5.889909000  | 5.343972000  | 7.566279000  |
| H | 5.615006000  | 6.173504000  | 6.915412000  |
| H | 5.760328000  | 5.633923000  | 8.610167000  |
| H | 5.267163000  | 4.475214000  | 7.348346000  |
| C | 5.072839000  | 7.387508000  | 3.994729000  |
| H | 4.177315000  | 7.763522000  | 3.517345000  |
| C | 8.987387000  | 1.221019000  | 9.030351000  |
| H | 9.057931000  | 2.025389000  | 9.757604000  |
| C | 6.181861000  | 3.733989000  | 11.509959000 |
| H | 6.416477000  | 4.577117000  | 12.154159000 |
| C | 6.711187000  | 3.685825000  | 10.218949000 |
| H | 7.370282000  | 4.484788000  | 9.891457000  |
| C | 9.797440000  | 2.296187000  | 3.251728000  |
| C | 5.366313000  | 2.706018000  | 11.971211000 |
| H | 4.950344000  | 2.742008000  | 12.974062000 |
| C | 7.453624000  | 9.608102000  | 7.199553000  |
| H | 7.549864000  | 9.949816000  | 6.173770000  |
| C | 7.606241000  | 7.855901000  | 8.831916000  |
| H | 7.815499000  | 6.824952000  | 9.101288000  |
| C | 8.774737000  | -0.876974000 | 7.223414000  |
| H | 8.678809000  | -1.695846000 | 6.515833000  |
| C | 7.315080000  | 8.772576000  | 9.844479000  |
| H | 7.281536000  | 8.437002000  | 10.877546000 |
| C | 8.393195000  | 1.244049000  | 1.304191000  |
| H | 8.958614000  | 0.316776000  | 1.285471000  |
| C | 5.108320000  | 1.616600000  | 11.138752000 |
| H | 4.497787000  | 0.791180000  | 11.494674000 |
| C | 7.156550000  | 10.522502000 | 8.204418000  |
| H | 6.997675000  | 11.566613000 | 7.948768000  |
| C | 9.739651000  | -0.928584000 | 8.225425000  |
| H | 10.398126000 | -1.788902000 | 8.309965000  |
| C | 10.399717000 | 8.181840000  | 6.484601000  |
| H | 10.312607000 | 8.129308000  | 7.566530000  |
| C | 6.616808000  | 2.633557000  | 0.423665000  |
| H | 5.823906000  | 2.792266000  | -0.303490000 |
| C | 7.078146000  | 10.107542000 | 9.534399000  |
| H | 6.849855000  | 10.822039000 | 10.320213000 |
| C | 10.623575000 | 8.367365000  | 3.722015000  |
| H | 10.698356000 | 8.443496000  | 2.640666000  |
| C | 9.845286000  | 0.129657000  | 9.129394000  |
| H | 10.587312000 | 0.099075000  | 9.922878000  |
| C | 11.702896000 | 8.725792000  | 4.524355000  |
| H | 12.626421000 | 9.081194000  | 4.075723000  |
| C | 7.349832000  | 1.447899000  | 0.397106000  |
| H | 7.116916000  | 0.682690000  | -0.338530000 |
| C | 11.585726000 | 8.632212000  | 5.911562000  |
| H | 12.417089000 | 8.918043000  | 6.550536000  |

|   |              |              |             |
|---|--------------|--------------|-------------|
| C | 10.771260000 | 1.189193000  | 3.410592000 |
| C | 11.111670000 | 0.726267000  | 4.687473000 |
| C | 11.413810000 | 0.639232000  | 2.292352000 |
| C | 12.057374000 | -0.281771000 | 4.842194000 |
| C | 12.378716000 | -0.353262000 | 2.451713000 |
| C | 12.696130000 | -0.821885000 | 3.725270000 |
| H | 10.614569000 | 1.150765000  | 5.553018000 |
| H | 11.184380000 | 1.016293000  | 1.300220000 |
| H | 12.297441000 | -0.643505000 | 5.837821000 |
| H | 12.883488000 | -0.758746000 | 1.579227000 |
| H | 13.441681000 | -1.602762000 | 3.848053000 |
| H | 8.942077000  | 3.912982000  | 3.172089000 |

### 2a<sup>+</sup>Int5

|    |              |              |              |
|----|--------------|--------------|--------------|
| Lu | -0.383305000 | -0.130837000 | -1.053294000 |
| N  | -0.713411000 | 0.858977000  | 1.448077000  |
| N  | -1.244469000 | 1.885173000  | -1.397291000 |
| N  | -1.931834000 | -1.471670000 | -0.158206000 |
| C  | 0.261416000  | 1.683521000  | 0.876930000  |
| C  | 1.398385000  | 0.907992000  | 0.703966000  |
| H  | 2.318625000  | 1.242382000  | 0.252175000  |
| C  | 1.119179000  | -0.399457000 | 1.181739000  |
| H  | 1.795541000  | -1.241271000 | 1.192181000  |
| C  | -0.086611000 | -2.861240000 | 2.116117000  |
| C  | -1.001236000 | -1.606002000 | 2.154340000  |
| C  | -2.166829000 | -1.748994000 | 1.178440000  |
| C  | -1.165389000 | 3.009751000  | -0.592098000 |
| C  | -0.186110000 | -0.415580000 | 1.657992000  |
| C  | 0.000672000  | 3.107186000  | 0.388966000  |
| C  | -1.455978000 | -1.444025000 | 3.617183000  |
| C  | 1.286630000  | 3.605571000  | -0.327255000 |
| N  | 1.922040000  | -0.238349000 | -2.166019000 |
| C  | -3.467226000 | -2.199590000 | 1.344131000  |
| H  | -3.946891000 | -2.475740000 | 2.271944000  |
| C  | -2.314751000 | 2.087099000  | -2.243190000 |
| H  | -2.575859000 | 1.343681000  | -2.984746000 |
| C  | -4.063378000 | -2.211687000 | 0.056544000  |
| H  | -5.075796000 | -2.507611000 | -0.186243000 |
| C  | -0.296815000 | -3.891954000 | 1.196935000  |
| H  | -1.113694000 | -3.814804000 | 0.487378000  |
| C  | -2.200983000 | -2.469344000 | 4.218329000  |
| H  | -2.449723000 | -3.354505000 | 3.642014000  |
| C  | -3.101458000 | -1.767194000 | -0.825262000 |
| H  | -3.164736000 | -1.647767000 | -1.898803000 |
| C  | -0.562462000 | -0.992567000 | -3.293817000 |
| C  | 1.328326000  | 3.796742000  | -1.710637000 |
| H  | 0.441972000  | 3.597387000  | -2.303531000 |
| C  | -1.629998000 | -1.154494000 | -4.196311000 |
| H  | -2.606739000 | -0.730716000 | -3.962295000 |
| C  | -2.177258000 | 3.895793000  | -0.924822000 |
| H  | -2.384948000 | 4.849453000  | -0.461565000 |
| C  | -0.269250000 | 4.090090000  | 1.543605000  |
| C  | 0.654507000  | -1.604196000 | -3.701079000 |
| C  | -2.073903000 | 1.277454000  | 1.797597000  |
| H  | -2.379658000 | 2.071918000  | 1.116277000  |
| H  | -2.103963000 | 1.641875000  | 2.825758000  |
| H  | -2.739310000 | 0.419723000  | 1.692342000  |
| C  | -2.911166000 | 3.302013000  | -1.985177000 |
| H  | -3.774016000 | 3.718246000  | -2.488736000 |
| C  | 0.961964000  | -2.990407000 | 3.038397000  |
| H  | 1.124314000  | -2.210934000 | 3.778076000  |
| C  | -1.460897000 | -0.276074000 | 5.752570000  |
| H  | -1.147957000 | 0.577997000  | 6.347250000  |
| C  | -1.071785000 | -0.362597000 | 4.414379000  |
| H  | -0.442495000 | 0.418982000  | 3.999043000  |
| C  | 1.765262000  | -1.403478000 | -2.746956000 |
| C  | -2.236976000 | -1.279575000 | 6.322683000  |
| H  | -2.543663000 | -1.213802000 | 7.362761000  |
| C  | -0.496094000 | 5.442946000  | 1.250108000  |
| H  | -0.481105000 | 5.772737000  | 0.216330000  |
| C  | -0.202927000 | 3.714878000  | 2.887935000  |
| H  | 0.033039000  | 2.688192000  | 3.151338000  |
| C  | 0.526586000  | -5.019690000 | 1.194383000  |
| H  | 0.341366000  | -5.813152000 | 0.475405000  |
| C  | -0.408178000 | 4.645124000  | 3.908752000  |

|   |              |              |              |
|---|--------------|--------------|--------------|
| H | -0.352209000 | 4.324107000  | 4.945487000  |
| C | 0.799665000  | -2.329040000 | -4.895215000 |
| H | 1.755970000  | -2.775671000 | -5.157736000 |
| C | -2.598031000 | -2.382820000 | 5.548591000  |
| H | -3.180547000 | -3.188833000 | 5.986602000  |
| C | -0.708387000 | 6.371241000  | 2.263947000  |
| H | -0.888018000 | 7.411931000  | 2.007985000  |
| C | 1.572293000  | -5.133067000 | 2.105564000  |
| H | 2.210955000  | -6.012147000 | 2.102700000  |
| C | 2.435092000  | 3.895814000  | 0.422987000  |
| H | 2.412588000  | 3.778348000  | 1.503109000  |
| C | -1.500883000 | -1.840793000 | -5.404552000 |
| H | -2.352735000 | -1.923896000 | -6.076131000 |
| C | -0.674200000 | 5.975239000  | 3.601419000  |
| H | -0.836553000 | 6.700684000  | 4.393593000  |
| C | 2.493371000  | 4.254409000  | -2.329959000 |
| H | 2.502600000  | 4.402085000  | -3.406641000 |
| C | 1.787796000  | -4.110678000 | 3.030167000  |
| H | 2.594057000  | -4.189858000 | 3.754706000  |
| C | 3.632737000  | 4.525637000  | -1.578078000 |
| H | 4.537923000  | 4.882586000  | -2.061695000 |
| C | -0.283752000 | -2.429664000 | -5.758855000 |
| H | -0.184110000 | -2.958761000 | -6.702724000 |
| C | 3.598641000  | 4.344780000  | -0.194972000 |
| H | 4.477102000  | 4.563474000  | 0.406478000  |
| C | 2.652558000  | -2.511336000 | -2.336901000 |
| C | 2.284014000  | -3.854727000 | -2.511058000 |
| C | 3.897724000  | -2.212489000 | -1.758143000 |
| C | 3.144281000  | -4.874775000 | -2.114939000 |
| C | 4.754056000  | -3.233799000 | -1.366482000 |
| C | 4.379228000  | -4.567033000 | -1.545736000 |
| H | 1.316473000  | -4.093433000 | -2.940699000 |
| H | 4.173896000  | -1.169671000 | -1.639916000 |
| H | 2.848575000  | -5.911446000 | -2.247581000 |
| H | 5.718821000  | -2.993929000 | -0.928466000 |
| H | 5.051395000  | -5.365275000 | -1.242709000 |
| H | 1.401540000  | 0.452170000  | -2.724190000 |

2a<sup>1</sup> Int6

|    |              |              |              |
|----|--------------|--------------|--------------|
| Lu | -0.428703000 | -0.197611000 | 0.162620000  |
| N  | -0.610300000 | 0.811519000  | 2.689806000  |
| N  | -0.722948000 | 2.077545000  | -0.074733000 |
| N  | -2.440152000 | -0.936101000 | 0.963133000  |
| C  | 0.616501000  | 1.269903000  | 2.200984000  |
| C  | 1.441118000  | 0.159376000  | 2.082885000  |
| H  | 2.454244000  | 0.174046000  | 1.714528000  |
| N  | -1.195349000 | -0.150834000 | -2.101872000 |
| C  | 0.710601000  | -0.985395000 | 2.497449000  |
| H  | 1.061310000  | -2.006104000 | 2.520746000  |
| C  | -1.323428000 | -2.898155000 | 3.348572000  |
| N  | -1.111797000 | -0.056420000 | -3.251464000 |
| C  | -1.752648000 | -1.405580000 | 3.320942000  |
| C  | -2.834786000 | -1.152483000 | 2.269849000  |
| C  | -0.238402000 | 3.061219000  | 0.767884000  |
| C  | -0.553902000 | -0.565629000 | 2.892646000  |
| C  | 0.871311000  | 2.710188000  | 1.757261000  |
| C  | -2.207926000 | -1.084698000 | 4.760053000  |
| C  | 2.268017000  | 2.775461000  | 1.083161000  |
| N  | 1.709692000  | -0.202351000 | -0.958546000 |
| C  | -4.222501000 | -1.173139000 | 2.349067000  |
| H  | -4.824995000 | -1.297330000 | 3.237066000  |
| C  | -1.464282000 | 1.298963000  | -5.161249000 |
| C  | -1.028599000 | 0.026370000  | -4.541292000 |
| C  | -1.690837000 | 2.682348000  | -0.842089000 |
| H  | -2.270468000 | 2.110740000  | -1.555147000 |
| C  | -4.708163000 | -0.973132000 | 1.033432000  |
| H  | -5.744620000 | -0.923638000 | 0.724670000  |
| C  | -1.903044000 | -3.837696000 | 2.495174000  |
| H  | -2.652095000 | -3.510848000 | 1.782124000  |
| C  | -3.303404000 | -1.773197000 | 5.301814000  |
| H  | -3.817605000 | -2.512880000 | 4.697644000  |
| C  | -3.596408000 | -0.836059000 | 0.225421000  |
| H  | -3.551570000 | -0.659879000 | -0.842489000 |
| C  | -0.026294000 | -2.298063000 | -0.993712000 |
| C  | -0.513153000 | -1.144075000 | -5.280305000 |

|   |              |              |              |
|---|--------------|--------------|--------------|
| C | 2.408966000  | 3.077195000  | -0.274548000 |
| H | 1.518805000  | 3.254982000  | -0.869889000 |
| C | -0.834479000 | -3.443958000 | -0.982016000 |
| H | -1.847099000 | -3.374208000 | -0.589263000 |
| C | -0.891864000 | 4.263432000  | 0.525653000  |
| H | -0.745471000 | 5.199677000  | 1.044686000  |
| C | 0.926737000  | 3.686912000  | 2.950060000  |
| C | 1.267708000  | -2.456450000 | -1.554788000 |
| C | -1.772836000 | 1.652279000  | 2.991822000  |
| H | -1.765684000 | 2.515024000  | 2.326320000  |
| H | -1.732005000 | 1.986224000  | 4.030024000  |
| H | -2.676570000 | 1.063610000  | 2.830365000  |
| C | -1.824115000 | 4.017038000  | -0.511040000 |
| H | -2.523381000 | 4.723771000  | -0.939265000 |
| C | -0.376225000 | -3.339540000 | 4.284337000  |
| H | 0.060740000  | -2.628960000 | 4.981136000  |
| C | -1.910246000 | 0.002226000  | 6.918720000  |
| H | -1.343372000 | 0.684145000  | 7.547100000  |
| C | -1.504125000 | -0.218223000 | 5.601217000  |
| H | -0.611145000 | 0.281247000  | 5.237166000  |
| C | -2.103755000 | 1.292333000  | -6.411194000 |
| H | -2.271524000 | 0.350161000  | -6.923761000 |
| C | 2.109618000  | -1.246627000 | -1.616817000 |
| C | -3.027775000 | -0.651885000 | 7.426126000  |
| H | -3.348482000 | -0.480128000 | 8.449796000  |
| C | 1.224261000  | 5.037858000  | 2.716084000  |
| H | 1.404502000  | 5.375082000  | 1.700363000  |
| C | 0.782494000  | 3.270078000  | 4.275706000  |
| H | 0.608235000  | 2.221555000  | 4.496385000  |
| C | -1.537319000 | -5.183351000 | 2.565176000  |
| H | -2.004567000 | -5.899096000 | 1.894123000  |
| C | 0.881230000  | 4.176297000  | 5.333307000  |
| H | 0.761964000  | 3.822969000  | 6.354046000  |
| C | 1.745394000  | -3.701027000 | -1.998526000 |
| H | 2.759605000  | -3.802509000 | -2.374875000 |
| C | -3.717294000 | -1.549831000 | 6.610836000  |
| H | -4.574238000 | -2.092633000 | 7.000651000  |
| C | 1.316494000  | 5.945117000  | 3.766332000  |
| H | 1.541821000  | 6.987095000  | 3.555473000  |
| C | -0.583823000 | -5.609058000 | 3.484806000  |
| H | -0.299683000 | -6.656605000 | 3.537300000  |
| C | 3.428328000  | 2.584440000  | 1.847127000  |
| H | 3.340152000  | 2.387183000  | 2.912197000  |
| C | 0.137258000  | -0.965753000 | -6.512807000 |
| H | 0.256048000  | 0.034364000  | -6.917180000 |
| C | -0.381309000 | -4.684046000 | -1.446089000 |
| H | -1.036945000 | -5.552104000 | -1.410788000 |
| C | 1.137818000  | 5.520113000  | 5.083310000  |
| H | 1.213416000  | 6.227688000  | 5.904184000  |
| C | -0.630861000 | -2.443150000 | -4.760206000 |
| H | -1.120951000 | -2.606771000 | -3.804595000 |
| C | 3.675766000  | 3.166635000  | -0.857710000 |
| H | 3.763141000  | 3.410967000  | -1.913125000 |
| C | -2.536343000 | 2.483330000  | -6.986729000 |
| H | -3.031316000 | 2.460137000  | -7.953761000 |
| C | -0.116784000 | -3.531082000 | -5.459590000 |
| H | -0.215202000 | -4.525725000 | -5.035524000 |
| C | -0.002372000 | -4.678483000 | 4.347045000  |
| H | 0.734529000  | -4.997837000 | 5.079482000  |
| C | 4.820762000  | 2.956108000  | -0.092746000 |
| H | 5.805266000  | 3.032688000  | -0.546097000 |
| C | -1.282510000 | 2.523265000  | -4.500406000 |
| H | -0.798132000 | 2.552253000  | -3.528198000 |
| C | 0.514274000  | -3.348043000 | -6.689931000 |
| H | 0.906083000  | -4.200880000 | -7.236968000 |
| C | 0.917399000  | -4.817934000 | -1.938428000 |
| H | 1.283414000  | -5.785263000 | -2.272376000 |
| C | 4.691228000  | 2.664687000  | 1.265942000  |
| H | 5.575954000  | 2.514820000  | 1.879241000  |
| C | 0.638502000  | -2.060322000 | -7.211089000 |
| H | 1.135555000  | -1.902777000 | -8.164560000 |
| C | -2.353071000 | 3.696122000  | -6.322891000 |
| H | -2.696382000 | 4.623210000  | -6.772967000 |
| C | -1.730775000 | 3.708633000  | -5.075487000 |
| H | -1.585785000 | 4.644679000  | -4.543794000 |

|   |             |              |              |
|---|-------------|--------------|--------------|
| C | 3.360747000 | -1.203275000 | -2.421372000 |
| C | 4.529343000 | -0.658926000 | -1.870215000 |
| C | 3.374985000 | -1.645093000 | -3.752700000 |
| C | 5.692109000 | -0.569477000 | -2.630303000 |
| C | 4.535067000 | -1.534650000 | -4.515071000 |
| C | 5.696787000 | -1.004252000 | -3.955224000 |
| H | 4.529190000 | -0.319435000 | -0.838067000 |
| H | 2.470725000 | -2.053363000 | -4.193773000 |
| H | 6.595563000 | -0.160643000 | -2.186751000 |
| H | 4.528864000 | -1.864547000 | -5.549981000 |
| H | 6.603261000 | -0.929540000 | -4.549538000 |
| H | 2.316306000 | 0.607474000  | -1.084849000 |

2a<sup>+</sup>TSS

|    |              |             |              |
|----|--------------|-------------|--------------|
| Lu | 7.396048000  | 3.923257000 | 4.605330000  |
| N  | 7.043665000  | 4.822032000 | 7.163403000  |
| N  | 7.120607000  | 6.159962000 | 4.434165000  |
| N  | 5.368878000  | 3.103615000 | 5.261595000  |
| C  | 8.295974000  | 5.311616000 | 6.777725000  |
| C  | 9.141830000  | 4.216171000 | 6.681970000  |
| H  | 10.179971000 | 4.255727000 | 6.394414000  |
| N  | 7.049284000  | 3.430284000 | 2.486242000  |
| C  | 8.399373000  | 3.048562000 | 7.000772000  |
| H  | 8.763345000  | 2.032320000 | 7.023404000  |
| C  | 6.332617000  | 1.084764000 | 7.660075000  |
| N  | 6.866708000  | 3.145902000 | 1.323982000  |
| C  | 5.892534000  | 2.574324000 | 7.645221000  |
| C  | 4.883624000  | 2.847483000 | 6.529727000  |
| C  | 7.512649000  | 7.129337000 | 5.341661000  |
| C  | 7.105543000  | 3.440090000 | 7.322891000  |
| C  | 8.558131000  | 6.768008000 | 6.393920000  |
| C  | 5.337992000  | 2.848824000 | 9.058948000  |
| C  | 9.994795000  | 6.864674000 | 5.812407000  |
| N  | 9.646330000  | 3.844391000 | 3.714413000  |
| C  | 3.494281000  | 2.813112000 | 6.507821000  |
| H  | 2.830117000  | 2.657242000 | 7.345544000  |
| C  | 6.053389000  | 4.790605000 | -0.254970000 |
| C  | 6.513719000  | 3.424793000 | 0.109277000  |
| C  | 6.193691000  | 6.756915000 | 3.611125000  |
| H  | 5.715204000  | 6.194017000 | 2.821245000  |
| C  | 3.102669000  | 3.047845000 | 5.166669000  |
| H  | 2.090780000  | 3.099106000 | 4.785456000  |
| C  | 5.801000000  | 0.161343000 | 6.758728000  |
| H  | 5.089120000  | 0.501297000 | 6.014174000  |
| C  | 4.212580000  | 2.138932000 | 9.502552000  |
| H  | 3.745881000  | 1.415868000 | 8.842365000  |
| C  | 4.267529000  | 3.216916000 | 4.444206000  |
| H  | 4.386823000  | 3.428907000 | 3.388678000  |
| C  | 7.842483000  | 1.815388000 | 3.322656000  |
| C  | 6.606198000  | 2.339945000 | -0.893250000 |
| C  | 10.215440000 | 7.171011000 | 4.466117000  |
| H  | 9.361758000  | 7.337482000 | 3.816671000  |
| C  | 6.986957000  | 0.714043000 | 3.354553000  |
| H  | 5.920303000  | 0.872182000 | 3.495893000  |
| C  | 6.841368000  | 8.316584000 | 5.084204000  |
| H  | 6.919573000  | 9.241124000 | 5.638041000  |
| C  | 8.519407000  | 7.711577000 | 7.612097000  |
| C  | 9.221009000  | 1.609654000 | 3.102397000  |
| C  | 5.853525000  | 5.640762000 | 7.414657000  |
| H  | 5.892594000  | 6.522561000 | 6.775326000  |
| H  | 5.824346000  | 5.945502000 | 8.462207000  |
| H  | 4.968926000  | 5.047922000 | 7.179649000  |
| C  | 5.996147000  | 8.074205000 | 3.972028000  |
| H  | 5.315056000  | 8.775871000 | 3.508173000  |
| C  | 7.229980000  | 0.625774000 | 8.635702000  |
| H  | 7.626397000  | 1.322782000 | 9.369381000  |
| C  | 5.480118000  | 3.868529000 | 11.265578000 |
| H  | 5.997849000  | 4.533191000 | 11.952112000 |
| C  | 5.977447000  | 3.691192000 | 9.973049000  |
| H  | 6.889929000  | 4.206240000 | 9.687165000  |
| C  | 4.956996000  | 4.973835000 | -1.113898000 |
| H  | 4.441129000  | 4.105287000 | -1.512873000 |
| C  | 10.098954000 | 2.793171000 | 3.110207000  |
| C  | 4.334635000  | 3.194010000 | 11.674440000 |
| H  | 3.943136000  | 3.332536000 | 12.678302000 |

|   |              |              |              |
|---|--------------|--------------|--------------|
| C | 8.795249000  | 9.074992000  | 7.430371000  |
| H | 9.024349000  | 9.443768000  | 6.435646000  |
| C | 8.309616000  | 7.254788000  | 8.915521000  |
| H | 8.150378000  | 6.196445000  | 9.098592000  |
| C | 6.162144000  | -1.185895000 | 6.824708000  |
| H | 5.726794000  | -1.890676000 | 6.121186000  |
| C | 8.324434000  | 8.133869000  | 10.000260000 |
| H | 8.155645000  | 7.750229000  | 11.002913000 |
| C | 9.722535000  | 0.307147000  | 2.945325000  |
| H | 10.787456000 | 0.148561000  | 2.798704000  |
| C | 3.708595000  | 2.319014000  | 10.786407000 |
| H | 2.830305000  | 1.760758000  | 11.099255000 |
| C | 8.803908000  | 9.955018000  | 8.507491000  |
| H | 9.013917000  | 11.007550000 | 8.337281000  |
| C | 7.066705000  | -1.628750000 | 7.784790000  |
| H | 7.346380000  | -2.677624000 | 7.834828000  |
| C | 11.107596000 | 6.685432000  | 6.646441000  |
| H | 10.955314000 | 6.482743000  | 7.703168000  |
| C | 6.734974000  | 2.619129000  | -2.263916000 |
| H | 6.752163000  | 3.650843000  | -2.601020000 |
| C | 7.493074000  | -0.579052000 | 3.214328000  |
| H | 6.822190000  | -1.432933000 | 3.267818000  |
| C | 8.560635000  | 9.489841000  | 9.800312000  |
| H | 8.570516000  | 10.176361000 | 10.642200000 |
| C | 6.612755000  | 0.993197000  | -0.490570000 |
| H | 6.515061000  | 0.759480000  | 0.565891000  |
| C | 11.514698000 | 7.278116000  | 3.962699000  |
| H | 11.663981000 | 7.528254000  | 2.915557000  |
| C | 4.521087000  | 6.253358000  | -1.445592000 |
| H | 3.665612000  | 6.374580000  | -2.104946000 |
| C | 6.741125000  | -0.031166000 | -1.421291000 |
| H | 6.739150000  | -1.064427000 | -1.083447000 |
| C | 7.602335000  | -0.713878000 | 8.692414000  |
| H | 8.299659000  | -1.046823000 | 9.456810000  |
| C | 12.612864000 | 7.080223000  | 4.796946000  |
| H | 13.622603000 | 7.172120000  | 4.406129000  |
| C | 6.692505000  | 5.925019000  | 0.262783000  |
| H | 7.539566000  | 5.802518000  | 0.931637000  |
| C | 6.859846000  | 0.259160000  | -2.781577000 |
| H | 6.952228000  | -0.542614000 | -3.508980000 |
| C | 8.859790000  | -0.782112000 | 3.007099000  |
| H | 9.251880000  | -1.789151000 | 2.897686000  |
| C | 12.403166000 | 6.783299000  | 6.144494000  |
| H | 13.250117000 | 6.643449000  | 6.811187000  |
| C | 6.857255000  | 1.589960000  | -3.194565000 |
| H | 6.958576000  | 1.833287000  | -4.249149000 |
| C | 5.168119000  | 7.374639000  | -0.925771000 |
| H | 4.824714000  | 8.372845000  | -1.182854000 |
| C | 6.253131000  | 7.204792000  | -0.067436000 |
| H | 6.757316000  | 8.068604000  | 0.356118000  |
| C | 11.421299000 | 2.778850000  | 2.436826000  |
| C | 12.522266000 | 3.407851000  | 3.036309000  |
| C | 11.575484000 | 2.187791000  | 1.173725000  |
| C | 13.753614000 | 3.438181000  | 2.389148000  |
| C | 12.805030000 | 2.235864000  | 0.522516000  |
| C | 13.896863000 | 2.854834000  | 1.130326000  |
| H | 12.416831000 | 3.858995000  | 4.019301000  |
| H | 10.723120000 | 1.714926000  | 0.695351000  |
| H | 14.603155000 | 3.915162000  | 2.869341000  |
| H | 12.909087000 | 1.790180000  | -0.462499000 |
| H | 14.857786000 | 2.882411000  | 0.624267000  |
| H | 10.261585000 | 4.654878000  | 3.638263000  |

2a<sup>+</sup>Int7

|    |              |              |              |
|----|--------------|--------------|--------------|
| Lu | -0.155849000 | -0.270174000 | -0.148480000 |
| N  | -0.795611000 | 0.831191000  | 2.271547000  |
| N  | -1.119158000 | 1.732641000  | -0.567271000 |
| N  | -1.726256000 | -1.649532000 | 0.660825000  |
| C  | 0.236381000  | 1.652661000  | 1.807900000  |
| C  | 1.400686000  | 0.902698000  | 1.851825000  |
| H  | 2.374382000  | 1.266675000  | 1.561222000  |
| N  | -0.156551000 | -1.277817000 | -2.198260000 |
| C  | 1.082004000  | -0.385765000 | 2.350341000  |
| H  | 1.759326000  | -1.210863000 | 2.506835000  |
| C  | -0.151318000 | -2.819660000 | 3.235759000  |

|   |              |              |              |            |              |              |              |
|---|--------------|--------------|--------------|------------|--------------|--------------|--------------|
| N | -1.318174000 | -1.088957000 | -2.964118000 | H          | -3.783235000 | -0.821368000 | -3.139635000 |
| C | -1.114457000 | -1.607512000 | 3.078487000  | C          | 2.909014000  | 3.757219000  | -1.273725000 |
| C | -2.131107000 | -1.857266000 | 1.968501000  | H          | 3.076322000  | 3.690034000  | -2.345084000 |
| C | -1.026440000 | 2.916901000  | 0.145271000  | C          | 1.157636000  | 2.558872000  | -4.769964000 |
| C | -0.276592000 | -0.416452000 | 2.623890000  | H          | 1.186212000  | 3.644557000  | -4.731656000 |
| C | 0.048157000  | 3.049131000  | 1.219906000  | C          | -4.944252000 | -0.163692000 | -4.830118000 |
| C | -1.765549000 | -1.379678000 | 4.455022000  | H          | -5.891956000 | -0.457659000 | -4.387447000 |
| C | 1.415308000  | 3.476134000  | 0.618722000  | C          | 1.599199000  | -3.950469000 | 4.488903000  |
| N | 2.036819000  | -0.801066000 | -0.607653000 | H          | 2.260780000  | -3.981000000 | 5.350862000  |
| C | -3.418661000 | -2.372830000 | 1.985535000  | C          | 3.928683000  | 4.187597000  | -0.428972000 |
| H | -4.011499000 | -2.619101000 | 2.854386000  | H          | 4.898436000  | 4.463608000  | -0.834291000 |
| C | -0.029814000 | 0.484730000  | -4.367113000 | C          | 1.066528000  | -0.225427000 | -4.872250000 |
| C | -1.264268000 | -0.234863000 | -3.930544000 | H          | 1.024824000  | -1.309657000 | -4.920833000 |
| C | -2.188093000 | 1.887869000  | -1.422829000 | C          | -4.915187000 | 0.422980000  | -6.096842000 |
| H | -2.499085000 | 1.080675000  | -2.069285000 | H          | -5.839182000 | 0.584645000  | -6.645331000 |
| C | -3.825827000 | -2.500063000 | 0.633351000  | C          | 1.517137000  | -5.120235000 | -2.723171000 |
| H | -4.778649000 | -2.869928000 | 0.276522000  | H          | 1.922874000  | -6.120701000 | -2.833147000 |
| C | -0.121131000 | -3.857701000 | 2.300909000  | C          | 3.691019000  | 4.268869000  | 0.943465000  |
| H | -0.791416000 | -3.827422000 | 1.448945000  | H          | 4.474248000  | 4.612140000  | 1.614396000  |
| C | -2.563517000 | -2.390483000 | 5.011150000  | C          | -3.695407000 | 0.803307000  | -6.651397000 |
| H | -2.714101000 | -3.312317000 | 4.459252000  | H          | -3.662247000 | 1.257237000  | -7.638020000 |
| C | -2.773401000 | -2.055620000 | -0.139706000 | C          | 2.244563000  | 1.845961000  | -5.275288000 |
| H | -2.687301000 | -1.998806000 | -1.217998000 | H          | 3.124045000  | 2.373550000  | -5.634784000 |
| C | 0.398062000  | -2.508305000 | -2.366568000 | C          | 2.194845000  | 0.453178000  | -5.326905000 |
| C | -2.528478000 | 0.014970000  | -4.672652000 | H          | 3.035435000  | -0.107191000 | -5.727190000 |
| C | 1.661006000  | 3.406232000  | -0.755008000 | C          | 4.021212000  | -2.031578000 | -1.193766000 |
| H | 0.870423000  | 3.079493000  | -1.422463000 | C          | 4.754346000  | -1.807966000 | -0.019540000 |
| C | -0.246564000 | -3.511887000 | -3.154848000 | C          | 4.711709000  | -2.339632000 | -2.374738000 |
| H | -1.203552000 | -3.265501000 | -3.598291000 | C          | 6.144052000  | -1.894575000 | -0.023550000 |
| C | -2.015328000 | 3.797779000  | -0.266001000 | C          | 6.101820000  | -2.410612000 | -2.380265000 |
| H | -2.209110000 | 4.785090000  | 0.127305000  | C          | 6.821178000  | -2.191540000 | -1.205398000 |
| C | -0.332077000 | 4.092577000  | 2.286486000  | H          | 4.227407000  | -1.595680000 | 0.907033000  |
| C | 1.699808000  | -2.843806000 | -1.832947000 | H          | 4.150303000  | -2.506976000 | -3.288539000 |
| C | -2.199533000 | 1.226274000  | 2.418910000  | H          | 6.697372000  | -1.736024000 | 0.897767000  |
| H | -2.421120000 | 2.009439000  | 1.694395000  | H          | 6.625303000  | -2.636291000 | -3.305076000 |
| H | -2.381473000 | 1.596788000  | 3.429313000  | H          | 7.905699000  | -2.255131000 | -1.210582000 |
| H | -2.827561000 | 0.353765000  | 2.232666000  | H          | 2.777076000  | -0.167898000 | -0.312757000 |
| C | -2.757788000 | 3.135782000  | -1.274818000 |            |              |              |              |
| H | -3.617307000 | 3.519249000  | -1.809227000 |            |              |              |              |
| C | 0.717120000  | -2.884387000 | 4.334987000  |            |              |              |              |
| H | 0.694212000  | -2.096793000 | 5.083174000  |            |              |              |              |
| C | -2.077928000 | -0.098021000 | 6.501240000  |            |              |              |              |
| H | -1.863153000 | 0.794758000  | 7.082565000  |            |              |              |              |
| C | -1.510218000 | -0.247947000 | 5.234366000  |            |              |              |              |
| H | -0.840878000 | 0.523131000  | 4.864192000  |            |              |              |              |
| C | 0.021986000  | 1.884085000  | -4.324522000 |            |              |              |              |
| H | -0.824793000 | 2.438381000  | -3.929009000 |            |              |              |              |
| C | 2.538440000  | -1.867618000 | -1.186314000 |            |              |              |              |
| C | -2.905541000 | -1.088431000 | 7.019434000  |            |              |              |              |
| H | -3.351282000 | -0.973556000 | 8.003488000  |            |              |              |              |
| C | -0.454116000 | 5.438665000  | 1.910143000  |            |              |              |              |
| H | -0.276086000 | 5.719755000  | 0.876846000  |            |              |              |              |
| C | -0.488042000 | 3.774723000  | 3.637590000  |            |              |              |              |
| H | -0.344021000 | 2.752397000  | 3.973352000  |            |              |              |              |
| C | 0.760295000  | -4.929382000 | 2.457547000  |            |              |              |              |
| H | 0.764842000  | -5.726357000 | 1.718897000  |            |              |              |              |
| C | -0.803266000 | 4.756620000  | 4.579211000  |            |              |              |              |
| H | -0.920045000 | 4.479319000  | 5.623463000  |            |              |              |              |
| C | 2.205015000  | -4.155539000 | -2.024038000 |            |              |              |              |
| H | 3.166633000  | -4.398322000 | -1.583097000 |            |              |              |              |
| C | -3.137175000 | -2.241991000 | 6.269692000  |            |              |              |              |
| H | -3.757236000 | -3.038430000 | 6.672294000  |            |              |              |              |
| C | -0.774608000 | 6.418639000  | 2.843722000  |            |              |              |              |
| H | -0.868953000 | 7.452861000  | 2.523721000  |            |              |              |              |
| C | 1.624615000  | -4.980152000 | 3.547751000  |            |              |              |              |
| H | 2.307658000  | -5.816678000 | 3.668916000  |            |              |              |              |
| C | 2.446151000  | 3.918420000  | 1.460253000  |            |              |              |              |
| H | 2.267852000  | 3.995340000  | 2.529204000  |            |              |              |              |
| C | -2.511080000 | 0.604338000  | -5.945174000 |            |              |              |              |
| H | -1.565314000 | 0.900109000  | -6.387525000 |            |              |              |              |
| C | 0.282095000  | -4.773062000 | -3.303017000 |            |              |              |              |
| H | -0.273589000 | -5.512713000 | -3.874765000 |            |              |              |              |
| C | -0.958821000 | 6.081256000  | 4.185267000  |            |              |              |              |
| H | -1.205843000 | 6.846818000  | 4.915399000  |            |              |              |              |
| C | -3.764535000 | -0.368650000 | -4.125380000 |            |              |              |              |
|   |              |              |              | <b>2a'</b> |              |              |              |
|   |              |              |              | Lu         | 8.362058000  | 5.877346000  | 4.529646000  |
|   |              |              |              | O          | 8.382439000  | 6.368948000  | 2.125007000  |
|   |              |              |              | N          | 6.184683000  | 5.181965000  | 4.170907000  |
|   |              |              |              | N          | 8.145926000  | 3.044285000  | 5.243907000  |
|   |              |              |              | N          | 10.551804000 | 6.749361000  | 4.309901000  |
|   |              |              |              | H          | 11.296729000 | 6.221074000  | 4.765438000  |
|   |              |              |              | N          | 8.590446000  | 5.595392000  | 6.787909000  |
|   |              |              |              | N          | 8.178951000  | 8.166457000  | 4.601783000  |
|   |              |              |              | C          | 9.195803000  | 4.612000000  | 7.548860000  |
|   |              |              |              | C          | 7.164419000  | 2.730536000  | 6.284135000  |
|   |              |              |              | H          | 6.182016000  | 3.060943000  | 5.945087000  |
|   |              |              |              | H          | 7.437378000  | 3.261102000  | 7.195773000  |
|   |              |              |              | H          | 7.144966000  | 1.655699000  | 6.473525000  |
|   |              |              |              | C          | 9.475568000  | 3.389191000  | 5.467607000  |
|   |              |              |              | C          | 10.078753000 | 3.578529000  | 6.853685000  |
|   |              |              |              | C          | 10.128522000 | 8.896950000  | 3.297440000  |
|   |              |              |              | C          | 8.773248000  | 9.059211000  | 3.754485000  |
|   |              |              |              | C          | 9.045399000  | 3.444404000  | 3.238423000  |
|   |              |              |              | H          | 9.157991000  | 3.532523000  | 2.170355000  |
|   |              |              |              | C          | 6.489706000  | 2.845016000  | 3.296349000  |
|   |              |              |              | C          | 7.878905000  | 3.059903000  | 3.879446000  |
|   |              |              |              | N          | 7.041939000  | 8.576755000  | 5.281817000  |
|   |              |              |              | C          | 5.620186000  | 3.944490000  | 3.907368000  |
|   |              |              |              | C          | 8.856308000  | 4.767295000  | 8.886704000  |
|   |              |              |              | H          | 9.153182000  | 4.135434000  | 9.711240000  |
|   |              |              |              | C          | 12.478179000 | 8.139206000  | 3.867567000  |
|   |              |              |              | C          | 11.008435000 | 7.877963000  | 3.837011000  |
|   |              |              |              | C          | 7.647109000  | 7.533476000  | 0.198351000  |
|   |              |              |              | H          | 8.088291000  | 8.531543000  | 0.290706000  |
|   |              |              |              | H          | 6.812158000  | 7.587850000  | -0.505414000 |
|   |              |              |              | C          | 8.004506000  | 5.895726000  | 8.962027000  |
|   |              |              |              | H          | 7.533429000  | 6.298004000  | 9.849698000  |
|   |              |              |              | C          | 5.963682000  | 1.413221000  | 3.553602000  |
|   |              |              |              | C          | 5.796727000  | 9.969750000  | 6.730055000  |
|   |              |              |              | C          | 4.577016000  | 9.690955000  | 6.092220000  |
|   |              |              |              | H          | 4.594042000  | 9.223644000  | 5.113051000  |

|   |              |              |              |
|---|--------------|--------------|--------------|
| C | 3.368867000  | 10.013766000 | 6.699986000  |
| H | 2.434800000  | 9.793313000  | 6.190490000  |
| C | 3.354457000  | 10.624918000 | 7.954393000  |
| H | 2.409878000  | 10.879406000 | 8.427372000  |
| C | 4.558811000  | 10.911403000 | 8.595287000  |
| H | 4.556695000  | 11.382067000 | 9.574661000  |
| C | 5.770225000  | 10.592439000 | 7.987802000  |
| H | 6.703687000  | 10.811306000 | 8.496890000  |
| C | 10.180290000 | 2.255486000  | 7.642280000  |
| C | 8.303357000  | 10.364663000 | 6.458987000  |
| C | 5.680971000  | 3.800261000  | 1.053521000  |
| H | 4.998589000  | 4.426846000  | 1.620787000  |
| C | 10.043055000 | 3.648331000  | 4.227691000  |
| H | 11.075576000 | 3.911192000  | 4.059377000  |
| C | 11.919895000 | 5.351455000  | 7.141654000  |
| H | 11.169985000 | 6.000367000  | 7.583008000  |
| C | 11.537343000 | 4.083207000  | 6.696578000  |
| C | 3.983141000  | 5.257337000  | 4.726872000  |
| H | 3.209849000  | 5.618056000  | 5.092006000  |
| C | 9.425965000  | 9.708777000  | 6.981836000  |
| H | 9.407821000  | 8.628794000  | 7.093477000  |
| C | 13.249057000 | 5.771278000  | 7.041766000  |
| H | 13.526571000 | 6.759739000  | 7.397279000  |
| C | 4.271234000  | 3.958142000  | 4.243945000  |
| H | 3.574969000  | 3.134413000  | 4.184373000  |
| C | 9.809481000  | 1.020567000  | 7.103939000  |
| H | 9.411749000  | 0.968216000  | 6.095260000  |
| C | 6.543725000  | 2.949446000  | 1.747655000  |
| C | 12.520544000 | 3.241219000  | 6.155834000  |
| H | 12.247341000 | 2.239555000  | 5.834917000  |
| C | 7.081594000  | 9.589456000  | 6.092698000  |
| C | 7.866890000  | 6.365589000  | 7.671377000  |
| H | 7.256794000  | 7.183740000  | 7.313831000  |
| C | 10.649263000 | 9.801640000  | 2.340190000  |
| H | 11.668328000 | 9.650576000  | 1.997180000  |
| C | 5.166477000  | 5.965397000  | 4.667069000  |
| H | 5.372673000  | 6.982467000  | 4.975444000  |
| C | 13.375272000 | 7.148933000  | 3.445995000  |
| H | 12.990914000 | 6.210106000  | 3.056387000  |
| C | 8.057903000  | 10.180708000 | 3.238663000  |
| H | 7.038134000  | 10.335490000 | 3.571543000  |
| C | 6.766720000  | 0.406144000  | 4.097657000  |
| H | 7.787035000  | 0.631256000  | 4.393496000  |
| C | 9.414816000  | 6.269638000  | 1.122391000  |
| H | 9.880067000  | 5.284506000  | 1.203444000  |
| H | 10.169156000 | 7.038836000  | 1.319634000  |
| C | 10.761984000 | 2.263725000  | 8.919116000  |
| H | 11.124266000 | 3.199088000  | 9.333180000  |
| C | 12.985026000 | 9.353309000  | 4.354337000  |
| H | 12.293668000 | 10.119299000 | 4.691950000  |
| C | 7.207425000  | 7.017341000  | 1.561009000  |
| H | 6.419830000  | 6.264862000  | 1.490117000  |
| H | 6.894968000  | 7.804382000  | 2.250041000  |
| C | 7.377132000  | 2.100614000  | 1.004090000  |
| H | 8.016485000  | 1.390368000  | 1.521272000  |
| C | 10.909040000 | 1.089763000  | 9.650301000  |
| H | 11.356493000 | 1.128040000  | 10.639933000 |
| C | 10.501388000 | -0.131652000 | 9.113136000  |
| H | 10.618831000 | -1.049479000 | 9.682457000  |
| C | 4.682518000  | 1.053527000  | 3.109915000  |
| H | 4.065918000  | 1.789846000  | 2.606247000  |
| C | 6.523545000  | 3.000261000  | -1.070692000 |
| H | 6.512182000  | 3.016521000  | -2.157218000 |
| C | 8.321378000  | 11.760839000 | 6.343619000  |
| H | 7.448631000  | 12.275715000 | 5.951643000  |
| C | 14.214433000 | 4.930923000  | 6.494510000  |
| H | 15.247491000 | 5.258478000  | 6.420275000  |
| C | 8.598612000  | 11.028352000 | 2.297047000  |
| H | 7.991683000  | 11.843953000 | 1.910685000  |
| C | 13.843487000 | 3.661110000  | 6.049580000  |
| H | 14.589057000 | 2.989387000  | 5.631720000  |
| C | 9.445378000  | 12.488861000 | 6.726522000  |
| H | 9.448091000  | 13.570795000 | 6.625662000  |
| C | 8.710650000  | 6.510515000  | -0.204036000 |
| H | 8.240314000  | 5.588614000  | -0.561458000 |

|   |              |              |              |
|---|--------------|--------------|--------------|
| H | 9.396938000  | 6.874850000  | -0.973545000 |
| C | 9.909200000  | 10.843646000 | 1.823306000  |
| H | 10.332311000 | 11.508092000 | 1.076803000  |
| C | 9.961904000  | -0.161415000 | 7.831705000  |
| H | 9.660752000  | -1.106198000 | 7.386903000  |
| C | 6.291846000  | -0.897452000 | 4.251503000  |
| H | 6.940407000  | -1.655764000 | 4.682338000  |
| C | 5.001004000  | -1.225816000 | 3.851005000  |
| H | 4.627143000  | -2.238577000 | 3.972733000  |
| C | 10.558380000 | 11.830581000 | 7.247640000  |
| H | 11.431010000 | 12.398395000 | 7.559665000  |
| C | 14.359304000 | 9.563137000  | 4.424381000  |
| H | 14.740866000 | 10.501896000 | 4.816309000  |
| C | 10.541927000 | 10.441387000 | 7.379807000  |
| H | 11.399068000 | 9.924762000  | 7.803122000  |
| C | 5.668122000  | 3.823906000  | -0.343244000 |
| H | 4.978037000  | 4.485777000  | -0.860616000 |
| C | 7.379327000  | 2.134425000  | -0.387490000 |
| H | 8.036638000  | 1.468206000  | -0.940409000 |
| C | 4.201500000  | -0.242022000 | 3.269294000  |
| H | 3.201089000  | -0.486839000 | 2.922480000  |
| C | 14.749451000 | 7.368963000  | 3.498283000  |
| H | 15.432631000 | 6.598577000  | 3.152210000  |
| C | 15.244373000 | 8.575532000  | 3.990407000  |
| H | 16.316372000 | 8.747182000  | 4.034525000  |

### 3a'

|    |              |              |              |
|----|--------------|--------------|--------------|
| Lu | 3.777311000  | 7.078210000  | 4.749662000  |
| Si | 8.000429000  | 9.231190000  | 4.482796000  |
| N  | 1.582974000  | 6.068168000  | 5.901384000  |
| N  | 4.645370000  | 8.700177000  | 3.400865000  |
| N  | 4.355184000  | 6.940542000  | 6.905152000  |
| N  | 3.661023000  | 5.019374000  | 3.899864000  |
| N  | 5.574176000  | 7.814183000  | 3.783164000  |
| C  | 1.257779000  | 6.145940000  | 4.544660000  |
| C  | 1.689479000  | 7.353930000  | 6.437692000  |
| C  | 1.456587000  | 8.245655000  | 5.398096000  |
| H  | 1.473928000  | 9.321150000  | 5.481049000  |
| C  | 2.163080000  | 7.657706000  | 7.859552000  |
| C  | 1.185372000  | 4.940387000  | 3.607792000  |
| C  | 1.763547000  | 4.822304000  | 6.654037000  |
| H  | 2.127704000  | 4.054127000  | 5.971064000  |
| H  | 0.814507000  | 4.507044000  | 7.090519000  |
| H  | 2.493139000  | 4.994931000  | 7.446360000  |
| C  | 1.191895000  | 7.496367000  | 4.220633000  |
| H  | 0.970611000  | 7.894090000  | 3.241389000  |
| C  | 3.522851000  | 6.976826000  | 8.008843000  |
| C  | 2.536305000  | 4.235339000  | 3.718635000  |
| C  | 0.953499000  | 5.480223000  | 2.168915000  |
| C  | 1.150239000  | 7.207666000  | 8.928311000  |
| C  | 4.649822000  | 9.666411000  | 2.505888000  |
| C  | 5.637119000  | 9.847804000  | 1.417052000  |
| C  | 2.292201000  | 9.200696000  | 7.988946000  |
| C  | 4.161944000  | 6.401003000  | 9.097895000  |
| H  | 3.761647000  | 6.266334000  | 10.092197000 |
| C  | 3.489600000  | 10.585974000 | 2.545917000  |
| C  | -0.095107000 | 6.659806000  | 8.609749000  |
| H  | -0.377295000 | 6.523624000  | 7.569918000  |
| C  | 3.538920000  | 9.827274000  | 8.068810000  |
| H  | 4.440564000  | 9.224317000  | 8.046803000  |
| C  | 1.138975000  | 9.996297000  | 8.043370000  |
| H  | 0.160834000  | 9.524302000  | 8.008227000  |
| C  | 1.229428000  | 11.381046000 | 8.157236000  |
| H  | 0.321815000  | 11.977306000 | 8.202116000  |
| C  | 5.522504000  | 6.338213000  | 7.317266000  |
| H  | 6.335448000  | 6.176516000  | 6.619624000  |
| C  | 6.133004000  | 11.125124000 | 1.101068000  |
| H  | 5.824557000  | 11.975881000 | 1.702339000  |
| C  | 1.437295000  | 7.443280000  | 10.281040000 |
| H  | 2.367099000  | 7.934202000  | 10.549545000 |
| C  | -0.000545000 | 4.010970000  | 3.927390000  |
| C  | 6.986467000  | 7.912624000  | 3.479108000  |
| H  | 7.193185000  | 8.055189000  | 2.411536000  |
| H  | 7.418819000  | 6.940677000  | 3.748475000  |
| C  | -0.292236000 | 6.020108000  | 1.818363000  |

|     |              |              |              |   |              |              |              |
|-----|--------------|--------------|--------------|---|--------------|--------------|--------------|
| H   | -1.092045000 | 6.043068000  | 2.553730000  | N | 7.293443000  | 1.540025000  | 5.110252000  |
| C   | 2.479088000  | 11.998295000 | 8.229519000  | C | 3.348347000  | 4.145711000  | 4.935040000  |
| H   | 2.552364000  | 13.077993000 | 8.327052000  | C | 6.691885000  | 4.426473000  | 2.377598000  |
| C   | -0.688628000 | 6.505163000  | 10.947419000 | C | 5.568460000  | 4.939107000  | 4.303292000  |
| H   | -1.393820000 | 6.228378000  | 11.725997000 | C | 5.888598000  | 3.015368000  | 0.553082000  |
| C   | 3.630065000  | 11.215867000 | 8.189062000  | C | 6.911604000  | 4.093345000  | 0.902739000  |
| H   | 4.609010000  | 11.682698000 | 8.256605000  | C | 4.878523000  | 5.152814000  | 6.699416000  |
| C   | 5.444782000  | 5.993612000  | 8.651350000  | C | 7.575764000  | 4.304528000  | 3.440337000  |
| H   | 6.208616000  | 5.499672000  | 9.237803000  | H | 8.607357000  | 3.996042000  | 3.365015000  |
| C   | 4.740181000  | 4.165297000  | 3.876894000  | C | 8.212212000  | 1.129214000  | 5.879058000  |
| H   | 5.747154000  | 4.546446000  | 3.999988000  | C | 8.362019000  | 3.569150000  | 0.718818000  |
| C   | 2.907879000  | 2.904672000  | 3.592007000  | C | 4.240902000  | 5.067828000  | 2.137514000  |
| H   | 2.253898000  | 2.052530000  | 3.457071000  | H | 4.253208000  | 4.441425000  | 1.245129000  |
| C   | -1.005341000 | 6.306125000  | 9.607866000  | H | 4.204819000  | 6.119483000  | 1.847663000  |
| H   | -1.965939000 | 5.880443000  | 9.330412000  | H | 3.372201000  | 4.826850000  | 2.750705000  |
| C   | 0.536493000  | 7.085095000  | 11.278491000 | C | 6.794049000  | 5.339110000  | 0.001202000  |
| H   | 0.787372000  | 7.272720000  | 12.318987000 | C | 1.960161000  | 4.169442000  | 4.951363000  |
| C   | 6.018443000  | 8.769345000  | 0.599330000  | H | 1.325356000  | 5.020270000  | 5.151680000  |
| H   | 5.605339000  | 7.783533000  | 0.795082000  | C | 6.877453000  | 4.621871000  | 4.635517000  |
| C   | 1.957015000  | 5.432538000  | 1.198017000  | H | 7.277826000  | 4.597016000  | 5.636935000  |
| H   | 2.921079000  | 5.002956000  | 1.448724000  | C | 9.448031000  | 4.446884000  | 0.846762000  |
| C   | -2.026934000 | 3.444303000  | 5.149731000  | H | 9.267299000  | 5.487574000  | 1.101778000  |
| H   | -2.740786000 | 3.686886000  | 5.932384000  | C | 3.834625000  | 6.654744000  | 5.042131000  |
| C   | 2.975349000  | 11.040679000 | 3.771950000  | C | 8.615928000  | 2.243390000  | 0.358698000  |
| H   | 3.467951000  | 10.744798000 | 4.693602000  | H | 7.782863000  | 1.557807000  | 0.243866000  |
| C   | 2.881538000  | 11.044346000 | 1.363899000  | C | 10.750530000 | 4.011614000  | 0.622294000  |
| H   | 3.267008000  | 10.710895000 | 0.404793000  | H | 11.576281000 | 4.711014000  | 0.721798000  |
| C   | -0.939795000 | 4.290872000  | 4.923223000  | C | 9.674671000  | 1.259498000  | 5.537578000  |
| H   | -0.841499000 | 5.191073000  | 5.522477000  | C | 4.395799000  | 4.182269000  | 7.580147000  |
| C   | 7.007065000  | 11.310463000 | 0.034295000  | H | 3.682819000  | 3.447842000  | 7.219978000  |
| H   | 7.388541000  | 12.304708000 | -0.182452000 | C | 6.990258000  | 5.203218000  | -1.381261000 |
| C   | -0.522346000 | 6.515379000  | 0.538078000  | H | 7.214269000  | 4.224369000  | -1.792660000 |
| H   | -1.495385000 | 6.930262000  | 0.288727000  | C | 7.888380000  | 0.468423000  | 7.197191000  |
| C   | 4.322508000  | 2.863504000  | 3.692892000  | C | 5.172112000  | 2.767689000  | -0.610179000 |
| H   | 4.950129000  | 1.983121000  | 3.642955000  | H | 5.187391000  | 3.348059000  | -1.521217000 |
| C   | 0.487879000  | 6.468670000  | -0.423196000 | C | 5.778244000  | 6.110732000  | 7.188593000  |
| H   | 0.308617000  | 6.849231000  | -1.425016000 | H | 6.138740000  | 6.893769000  | 6.526822000  |
| C   | 1.876802000  | 11.896723000 | 3.817329000  | C | 1.525274000  | 2.863173000  | 4.616251000  |
| H   | 1.507409000  | 12.241731000 | 4.779495000  | H | 0.501838000  | 2.523129000  | 4.523583000  |
| C   | 9.456925000  | 9.760168000  | 3.388791000  | C | 6.200943000  | 6.085114000  | 8.514386000  |
| H   | 10.068617000 | 8.897461000  | 3.103890000  | H | 6.900994000  | 6.836326000  | 8.870424000  |
| H   | 10.105735000 | 10.467909000 | 3.915902000  | C | 6.600849000  | 6.626324000  | 0.509265000  |
| H   | 9.103473000  | 10.241246000 | 2.471286000  | H | 6.508710000  | 6.777605000  | 1.580670000  |
| C   | -0.212296000 | 2.880249000  | 3.124821000  | C | 10.992843000 | 2.688440000  | 0.250315000  |
| H   | 0.462811000  | 2.681560000  | 2.298909000  | H | 12.007255000 | 2.352400000  | 0.052114000  |
| C   | 7.391434000  | 10.225914000 | -0.756525000 | C | 2.666109000  | 2.115001000  | 4.409819000  |
| H   | 8.070921000  | 10.371241000 | -1.591661000 | H | 2.746074000  | 1.081652000  | 4.097508000  |
| C   | 1.723574000  | 5.922480000  | -0.088606000 | C | 10.085295000 | 1.264411000  | 4.198426000  |
| H   | 2.515583000  | 5.871461000  | -0.831027000 | H | 9.336684000  | 1.136109000  | 3.421758000  |
| C   | 6.961937000  | 10.734658000 | 4.975694000  | C | 2.757961000  | 7.081157000  | 5.833926000  |
| H   | 6.639841000  | 11.309205000 | 4.103881000  | H | 2.327217000  | 6.398634000  | 6.559251000  |
| H   | 7.549796000  | 11.395849000 | 5.622166000  | C | 10.643543000 | 1.450296000  | 6.533770000  |
| H   | 6.071611000  | 10.428091000 | 5.533021000  | H | 10.342585000 | 1.463799000  | 7.577264000  |
| C   | 6.887865000  | 8.957585000  | -0.473839000 | C | 6.932231000  | 6.306057000  | -2.226750000 |
| H   | 7.166009000  | 8.109904000  | -1.094411000 | H | 7.080765000  | 6.170104000  | -3.294639000 |
| C   | 1.786268000  | 11.901173000 | 1.410018000  | C | 4.426901000  | 7.589619000  | 4.189054000  |
| H   | 1.324949000  | 12.232417000 | 0.483301000  | H | 5.302416000  | 7.313878000  | 3.608787000  |
| C   | -2.200085000 | 2.303244000  | 4.373621000  | C | 5.714352000  | 5.110602000  | 9.386401000  |
| H   | -3.043736000 | 1.641749000  | 4.549076000  | H | 6.034356000  | 5.095209000  | 10.424607000 |
| C   | 1.275081000  | 12.329063000 | 2.636249000  | C | 9.921831000  | 1.807790000  | 0.122676000  |
| H   | 0.423169000  | 13.002670000 | 2.669419000  | H | 10.096255000 | 0.776820000  | -0.174357000 |
| C   | 8.664245000  | 8.411410000  | 6.058584000  | C | 4.378157000  | 1.620981000  | -0.361554000 |
| H   | 7.849715000  | 8.087696000  | 6.714200000  | H | 3.681422000  | 1.152826000  | -1.045135000 |
| H   | 9.287851000  | 9.113866000  | 6.622509000  | C | 4.648112000  | 1.233751000  | 0.935245000  |
| H   | 9.280128000  | 7.536133000  | 5.824891000  | H | 4.204324000  | 0.428897000  | 1.507382000  |
| C   | -1.289360000 | 2.030242000  | 3.352300000  | C | 4.806731000  | 4.166530000  | 8.915049000  |
| H   | -1.425698000 | 1.157687000  | 2.719172000  | H | 4.406249000  | 3.413004000  | 9.588251000  |
|     |              |              |              | C | 4.822330000  | -0.642773000 | 4.980251000  |
|     |              |              |              | H | 3.740568000  | -0.775737000 | 4.883542000  |
|     |              |              |              | H | 5.040427000  | 0.031604000  | 5.811471000  |
|     |              |              |              | C | 3.930477000  | 8.890513000  | 4.084677000  |
|     |              |              |              | H | 4.411108000  | 9.594602000  | 3.410664000  |
|     |              |              |              | C | 2.255399000  | 8.373665000  | 5.727327000  |
|     |              |              |              | H | 1.416072000  | 8.674302000  | 6.348673000  |
|     |              |              |              | C | 11.983107000 | 1.640928000  | 6.198876000  |
| 4a' |              |              |              |   |              |              |              |
| Lu  | 5.820103000  | 2.300899000  | 3.774521000  |   |              |              |              |
| O   | 5.291014000  | -0.013136000 | 3.749767000  |   |              |              |              |
| N   | 5.454540000  | 4.801418000  | 2.916105000  |   |              |              |              |
| N   | 5.575802000  | 2.071901000  | 1.514154000  |   |              |              |              |
| N   | 3.794034000  | 2.879107000  | 4.602697000  |   |              |              |              |
| C   | 4.386736000  | 5.226753000  | 5.228635000  |   |              |              |              |

|   |              |              |              |   |              |              |              |
|---|--------------|--------------|--------------|---|--------------|--------------|--------------|
| H | 12.717416000 | 1.801091000  | 6.984074000  | H | 6.482580000  | -1.849023000 | 5.656374000  |
| C | 2.834046000  | 9.285267000  | 4.843763000  | C | 6.550200000  | 7.737240000  | -0.335230000 |
| H | 2.444102000  | 10.296008000 | 4.762919000  | H | 6.396769000  | 8.725839000  | 0.089220000  |
| C | 8.584757000  | -0.669584000 | 7.630226000  | C | 12.379059000 | 1.626476000  | 4.862925000  |
| H | 9.417762000  | -1.043135000 | 7.040717000  | H | 13.424610000 | 1.765944000  | 4.601092000  |
| C | 6.702997000  | 7.581160000  | -1.708685000 | C | 6.820400000  | 0.937508000  | 7.972780000  |
| H | 6.661277000  | 8.443290000  | -2.368374000 | H | 6.281789000  | 1.819848000  | 7.639042000  |
| C | 6.218107000  | -0.904562000 | 3.072650000  | C | 11.424350000 | 1.436019000  | 3.862635000  |
| H | 7.239936000  | -0.606819000 | 3.336877000  | H | 11.719350000 | 1.429593000  | 2.817611000  |
| H | 6.064011000  | -0.777433000 | 1.999949000  | C | 8.212949000  | -1.329864000 | 8.800865000  |
| C | 5.887719000  | -2.283783000 | 3.613944000  | H | 8.753723000  | -2.219160000 | 9.114302000  |
| H | 6.720495000  | -2.982116000 | 3.496448000  | C | 7.155039000  | -0.847411000 | 9.569362000  |
| H | 5.014838000  | -2.698812000 | 3.097758000  | H | 6.871577000  | -1.353715000 | 10.488231000 |
| C | 5.562937000  | -1.971337000 | 5.076321000  | C | 6.464225000  | 0.292287000  | 9.153684000  |
| H | 4.955579000  | -2.741378000 | 5.559051000  | H | 5.645341000  | 0.679874000  | 9.754096000  |

## 8. References

1. M. Hu, C. Ni, L. Li, Y. Han and J. Hu, *gem*-Difluoroolefination of Diazo Compounds with  $\text{TMSCF}_3$  or  $\text{TMSCF}_2\text{Br}$ : Transition-Metal-Free Cross-Coupling of Two Carbene Precursors, *J. Am. Chem. Soc.*, 2015, **137**, 14496–14501.
2. X. Zhu, D. Guo, Z. Huang, T. Sheng, S. Wang, M. Pan, L. Zha and S. Zhou, Dehydrogenative Coupling of Terminal Alkynes with O/N-Based Monohydrosilanes Catalyzed by Rare-Earth Metal Complexes, *Inorg. Chem.*, 2020, **22**, 1212–1222.
3. S. Perrone, A. Salomone, A. Caroli, A. Falcicchio, C. Citti, G. Cannazza and L. Troisi, Stereoselective Synthesis of  $\alpha$ -Alkylidene  $\beta$ -Oxo Amides by Palladium-Catalyzed Carbonylation, *Eur. J. Org. Chem.*, 2014, **27**, 5932–5938.
4. (a) G. M. Sheldrick, SADABS: Program for Empirical Absorption Correction of Area Detector Data; University of Göttingen: Germany, 1996. (b) O. V. L. Dolomanov, J. R. Gildea, J. Bourhis, J. A. K. Howard and H. Puschmann, *J. Appl. Crystallogr.*, 2009, **42**, 339–341.
5. A. L. Spek, PLATON SQUEEZE: a tool for the calculation of the disordered solvent contribution to the calculated structure factors, *Acta Crystallogr., Sect. C: Struct. Chem.*, 2015, **71**, 9–18.
6. C. C. Bories, M. Barbazanges, E. Derat and M. Petit, Implication of a Silyl Cobalt Dihydride Complex as a Useful Catalyst for the Hydrosilylation of Imines, *ACS Catal.*, 2021, **11**, 14262–14273.
7. B. Peng, J. Ma, J. Guo, Y. Gong, R. Wang, Y. Zhang, J. Zeng, W. Chen, K. Ding and B. Zhao, A Powerful Chiral Super Brønsted C–H Acid for Asymmetric Catalysis, *J. Am. Chem. Soc.*, 2022, **144**, 2853–2860.
8. E. Y. Schmidt, I. A. Bidusenko, N. I. Protsuk, Y. V. Demyanov, I. A. Ushakov, A. V. Vashchenko and B. A. Trofimov, Transition-Metal-Free Superbase-Catalyzed C–H Vinylation of Aldimines with Acetylenes to 1Azadienes, *J. Org. Chem.*, 2020, **85**, 3417–3425.



9. H. Montes-Andrés, P. Leo, A. Muñoz, A. Rodríguez-Dieguez, G. Orcajo, D. Choquesillo-Lazarte, C. Martos, F. Martínez, J. Botas and G. Calleja, Two Isostructural URJC-4 Materials: From Hydrogen Physisorption to Heterogeneous Reductive Amination through Hydrogen Molecule Activation at Low Pressure, *Inorg. Chem.*, 2020, **59**, 15733–15740.
10. H. Lyu, Y. Quan, B. Cheng and Z. Xie, Rhodium catalyzed multicomponent dehydrogenative annulation: one-step construction of isoindole derivatives, *Chem. Commun.*, 2021, **57**, 7930–7933.
11. Gaussian 16, B. Revision, M. J. Frisch, G. W. Trucks, H. B. Schlegel, G. E. Scuseria, M. A. Robb, J. R. Cheeseman, G. Scalmani, V. Barone, G. A. Petersson, H. Nakatsuji, X. Li, M. Caricato, A. V. Marenich, J. Bloino, B. G. Janesko, R. Gomperts, B. Mennucci, H. P. Hratchian, J. V. Ortiz, A. F. Izmaylov, J. L. Sonnenberg, D. Williams-Young, F. Ding, F. Lipparini, F. Egidi, J. Goings, B. Peng, A. Petrone, T. Henderson, D. Ranasinghe, V. G. Zakrzewski, J. Gao, N. Rega, G. Zheng, W. Liang, M. Hada, M. Ehara, K. Toyota, R. Fukuda, J. Hasegawa, M. Ishida, T. Nakajima, Y. Honda, O. Kitao, H. Nakai, T. Vreven, K. Throssell, J. J. A. Montgomery, J. E. Peralta, F. Ogliaro, M. J. Bearpark, J. J. Heyd, E. N. Brothers, K. N. Kudin, V. N. Staroverov, T. A. Keith, R. Kobayashi, J. Normand, K. Raghavachari, A. P. Rendell, J. C. Burant, S. S. Iyengar, J. Tomasi, M. Cossi, J. M. Millam, M. Klene, C. Adamo, R. Cammi, J. W. Ochterski, R. L. Martin, K. Morokuma, O. Farkas, J. B. Foresman and D. J. Fox, Gaussian, Inc., Wallingford CT, 2016.
12. (a) A. D. Becke, *J. Chem. Phys.*, 1993, **98**, 5648; (b) K. Burke, J. P. Perdew, W. Yang, in *Electronic Density Functional Theory: Recent Progress and New Directions*, Eds: J. F. Dobson, G. Vignale and M. P. Das, Plenum, New York., 1998.
13. (a) A. Moritz, X. Cao and M. Dolg, *Theor. Chem. Acc.*, 2007, **118**, 845–854; (b) A. Höllwarth, M. Böhme, S. Dapprich, A.W. Ehlers, A. Gobbi, V. Jonas, K.F. Kohler, R. Stegmann, A. Veldkamp and G. Frenking, *J. Chem. Phys.*, 1993, **208**, 237.
14. (a) P. C. Hariharan and J. A. Pople, *Theor. Chim. Acta* 1973, **28**, 213; (b) W. J. Hehre, Ditchfield, R. and J. A. Pople, *J. Chem. Phys.*, 1972, **56**, 2257.
